# Supplementary material for: Protective activities of polysaccharides from Cipangopaludina chinensis against high-fat-diet-induced atherosclerosis via regulating gut microbiota in ApoE-deficient mice
Source: Royal Society of Chemistry journal article supplement (doi:10.1039/c9fo01530b), 2019-01-01
Supplement: c9fo01530b1.xlsx [file c9fo01530b1.xlsx]

## Sheet: Sheet1
OTU_id	Kingdom	Phylum	Class	Order	Family	Genus	Species	N1	N2	N3	N4	N5	N6	N7	N8	M1	M2	M3	M4	M5	M6	M7	M8	PDG1	PDG2	PDG3	PDG4	PDG5	PDG6	PDG7	PDG8	CLG1	CLG2	CLG3	CLG4	CLG5	CLG6	CLG7	CLG8	CHG1	CHG2	CHG3	CHG4	CHG5	CHG6	CHG7	CHG8
OTU_1	k__Bacteria	p__Firmicutes	c__Erysipelotrichia	o__Erysipelotrichales	f__Erysipelotrichaceae	g__Dubosiella	s__	65	94	116	216	1506	2699	1974	1820	18002	8023	4629	4995	187	1590	3366	29	1122	119	2110	5116	1512	1184	2617	3144	5	13548	4922	26	24	408	19305	2012	1741	5128	1430	6963	1748	791	2512	705
OTU_2	k__Bacteria	p__Firmicutes	c__Erysipelotrichia	o__Erysipelotrichales	f__Erysipelotrichaceae	g__Dubosiella	s__	3391	500	6883	3184	16280	8356	17317	10002	117	5706	2528	1795	63	1310	213	6682	9905	779	5312	555	2735	7212	5223	2317	39	350	156	2489	2275	324	139	184	59	8631	22	3030	2547	2944	391	3816
OTU_3	k__Bacteria	p__Bacteroidetes	c__Bacteroidia	o__Bacteroidales	f__Bacteroidaceae	g__Bacteroides	s__Bacteroides_acidifaciens	1915	43	154	75	14	4	1024	307	6	8	212	61	170	60	126	240	302	75	135	167	240	41	149	49	2543	183	8	101	128	3	2	49	309	63	892	26	102	286	361	148
OTU_4	k__Bacteria	p__Firmicutes	c__Erysipelotrichia	o__Erysipelotrichales	f__Erysipelotrichaceae	g__Ileibacterium	s__Ileibacterium_valens	5927	2418	10120	19571	3314	1657	22	3170	2200	4485	491	69	27	10184	2578	26	3409	6087	660	5847	11485	11358	41	6752	7	2263	541	67	12	11	2594	329	17	3840	6	2	1856	9179	2946	10
OTU_5	k__Bacteria	p__unidentified_Bacteria	c__unidentified_Bacteria	o__Campylobacterales	f__Helicobacteraceae	g__Helicobacter	Others	0	0	0	0	0	0	0	0	0	0	0	0	0	0	0	0	0	0	0	0	0	0	0	3	0	0	0	0	0	0	1	0	0	1	0	0	0	0	0	0
OTU_6	k__Bacteria	p__unidentified_Bacteria	c__unidentified_Bacteria	o__Campylobacterales	f__Helicobacteraceae	g__Helicobacter	Others	228	1017	5465	1374	330	449	516	569	93	99	2404	5647	671	79	2637	143	1781	105	154	32	340	132	3963	103	217	1139	346	1432	34	199	103	1014	5817	254	14	3146	1246	1163	352	3719
OTU_7	k__Bacteria	p__unidentified_Bacteria	c__unidentified_Bacteria	o__Campylobacterales	f__Helicobacteraceae	g__Helicobacter	s__Helicobacter_ganmani	0	1	0	0	0	0	0	60	0	0	0	2	0	0	0	0	5	0	0	0	0	0	2	0	0	0	0	0	0	0	0	3	0	0	0	0	0	0	0	0
OTU_8	k__Bacteria	p__Firmicutes	c__Bacilli	o__Lactobacillales	f__Lactobacillaceae	g__Lactobacillus	s__Lactobacillus_gasseri	36	66	164	74	571	134	341	683	168	519	1184	2041	3286	2071	41	1223	1160	25	981	420	246	2214	762	42	5032	2527	214	442	1583	4482	437	3262	288	362	28	116	255	1028	426	1642
OTU_9	k__Bacteria	p__Bacteroidetes	c__Bacteroidia	o__Bacteroidales	f__Muribaculaceae	g__	s__	358	109	451	84	362	418	247	427	224	29	547	102	378	233	51	1641	555	1242	2542	629	68	113	1266	282	2173	1890	485	715	506	84	132	1761	2114	596	2589	374	1923	817	2211	217
OTU_10	k__Bacteria	p__Proteobacteria	c__Deltaproteobacteria	o__Desulfovibrionales	f__Desulfovibrionaceae	g__Desulfovibrio	Others	29	80	307	473	1045	1232	127	296	192	587	100	1156	137	707	320	51	978	234	415	426	1715	1854	780	229	11	99	71	2203	2474	618	714	772	290	270	779	199	625	801	275	1021
OTU_11	k__Bacteria	p__Firmicutes	c__Erysipelotrichia	o__Erysipelotrichales	f__Erysipelotrichaceae	g__Erysipelatoclostridium	Others	247	99	120	219	10	5	1107	26	68	5	2448	84	1330	54	2	192	23	14	13	9	73	60	935	130	81	16	79	1284	18	1	1	7	438	426	73	38	2	4	59	124
OTU_12	k__Bacteria	p__Bacteroidetes	c__Bacteroidia	o__Bacteroidales	f__Muribaculaceae	g__	s__	1246	247	606	380	33	34	285	381	14	6	249	36	60	15	166	247	344	76	1047	294	137	37	887	21	52	31	199	1324	504	40	10	475	665	366	96	248	192	47	975	85
OTU_13	k__Bacteria	p__Firmicutes	c__Clostridia	o__Clostridiales	f__Lachnospiraceae	Others	Others	32	26	1	8	37	11	1654	5	1	1	238	699	9	45	777	5	323	6	2	3	30	42	50	7	4	2	4	7	10	3	3	0	2	25	2877	1751	324	775	1	23
OTU_14	k__Bacteria	p__Bacteroidetes	c__Bacteroidia	o__Bacteroidales	f__Muribaculaceae	g__	s__	1146	195	300	207	259	79	349	401	8	5	853	813	84	29	962	610	103	154	207	46	898	124	1502	31	1666	198	35	912	402	25	9	257	992	64	2974	871	510	319	98	1343
OTU_15	k__Bacteria	p__Firmicutes	c__Clostridia	o__Clostridiales	f__Lachnospiraceae	Others	Others	0	16	23	0	11	4	1	3	7	3	0	1	1489	997	1	3	0	19	3	0	0	254	0	1141	0	7	14	4	378	0	0	3	2	3	409	7	4	2	3	0
OTU_16	k__Bacteria	p__Firmicutes	c__Erysipelotrichia	o__Erysipelotrichales	f__Erysipelotrichaceae	g__Faecalibaculum	s__	2	11	9	2	16	22	10	12	182	660	212	111	10	13	2	73	123	8	222	649	6	30	139	15	0	76	215	8	6	9325	194	689	13	46	7	23	2984	1096	455	7
OTU_17	k__Bacteria	p__Firmicutes	c__Bacilli	o__Lactobacillales	f__Lactobacillaceae	g__Lactobacillus	s__Lactobacillus_reuteri	99	60	138	116	494	154	69	479	195	246	408	772	884	441	11	589	210	14	1060	84	61	810	127	51	855	2115	909	285	2005	3298	351	1046	164	210	3	54	126	144	68	585
OTU_18	k__Bacteria	p__Bacteroidetes	c__Bacteroidia	o__Bacteroidales	f__Muribaculaceae	g__	s__	62	40	28	10	122	129	649	171	2	19	110	426	43	33	751	344	53	428	347	1	464	47	292	52	235	643	19	967	83	13	5	61	1503	80	1724	632	2	3	2	860
OTU_19	k__Bacteria	p__Bacteroidetes	c__Bacteroidia	o__Bacteroidales	f__Bacteroidaceae	g__Bacteroides	s__Bacteroides_sartorii	86	4	9	3	2	3	10	8	2	0	20	0	27	1	22	14	5	4	47	8	5	0	4	10	172	8	0	6	4	0	0	10	18	4	9	3	0	3	9	2
OTU_20	k__Bacteria	p__Bacteroidetes	c__Bacteroidia	o__Bacteroidales	f__Muribaculaceae	g__	s__	104	18	36	13	21	15	137	253	14	10	63	56	88	9	984	878	67	20	1033	153	200	17	467	63	1188	323	41	127	267	14	13	264	998	247	611	262	288	119	425	110
OTU_21	k__Bacteria	p__Firmicutes	c__Bacilli	o__Lactobacillales	f__Lactobacillaceae	g__Lactobacillus	Others	12	14	50	16	224	194	54	319	238	375	903	747	268	1210	127	447	127	65	420	222	144	606	440	100	229	463	2988	458	810	2938	458	6431	219	253	27	34	152	367	160	426
OTU_22	k__Bacteria	p__Firmicutes	c__Clostridia	o__Clostridiales	f__Lachnospiraceae	Others	Others	5	5	69	4	10	7	721	14	202	208	27	4	361	93	26	3	293	1469	804	13	86	663	12	13	156	176	38	59	611	19	189	994	1469	56	15	89	17	894	23	7
OTU_23	k__Bacteria	p__Bacteroidetes	c__Bacteroidia	o__Bacteroidales	f__Muribaculaceae	g__	s__	1969	656	1037	523	91	16	153	98	22	6	17	6	2	8	982	17	217	0	70	34	769	20	14	192	21	79	14	44	120	0	9	27	63	98	1132	605	6	14	91	2
OTU_24	k__Bacteria	p__Bacteroidetes	c__Bacteroidia	o__Bacteroidales	f__Muribaculaceae	g__	s__	796	18	98	83	30	17	212	66	1	33	127	396	120	18	404	921	65	24	182	36	267	28	149	72	890	64	17	221	222	15	2	84	436	48	849	167	192	92	99	99
OTU_25	k__Bacteria	p__Proteobacteria	c__Deltaproteobacteria	o__Desulfovibrionales	f__Desulfovibrionaceae	g__	s__	0	0	0	0	0	0	0	16	0	0	0	2	0	0	0	0	0	0	0	0	0	0	0	0	0	0	0	0	0	0	0	0	0	0	0	0	0	0	0	0
OTU_26	k__Bacteria	p__Bacteroidetes	c__Bacteroidia	o__Bacteroidales	f__Muribaculaceae	g__	s__	929	216	429	154	34	34	79	446	0	15	49	72	96	26	34	44	192	30	591	25	368	132	17	25	264	122	34	32	96	64	13	106	121	18	891	293	207	61	20	392
OTU_27	k__Bacteria	p__Firmicutes	c__Erysipelotrichia	o__Erysipelotrichales	f__Erysipelotrichaceae	g__Turicibacter	s__	3	6	0	2	2	0	552	226	1	3	49	4	4	98	0	7	42	154	10	3	3	83	9	81	0	1	1	5	2	6	3	14	0	1	0	6	3	3	3	762
OTU_28	k__Bacteria	p__Bacteroidetes	c__Bacteroidia	o__Bacteroidales	f__Muribaculaceae	g__	s__	224	28	115	74	223	74	289	507	4	36	81	23	192	32	713	1072	367	219	258	182	1307	57	643	152	916	64	64	738	374	9	11	200	601	150	172	137	82	20	674	12
OTU_29	k__Bacteria	p__Firmicutes	c__Clostridia	o__Clostridiales	f__Lachnospiraceae	Others	Others	1	1	4	3	0	3	0	1	40	2	59	7	1018	0	2	0	4	4	1	0	0	89	2	0	99	2	0	3	506	0	2	4	7	1	8	0	0	1	3	0
OTU_30	k__Bacteria	p__Firmicutes	c__Clostridia	o__Clostridiales	f__Lachnospiraceae	g__unidentified_Lachnospiraceae	s__Lachnospiraceae_bacterium_M18-1	52	114	30	129	114	38	174	25	103	505	727	1784	755	139	937	25	344	40	90	30	129	188	476	123	217	30	15	603	185	42	989	370	42	156	149	53	9	145	41	178
OTU_31	k__Bacteria	p__Deferribacteres	c__unidentified_Deferribacteres	o__Deferribacterales	f__Deferribacteraceae	g__Mucispirillum	s__Mucispirillum_schaedleri	22	89	157	79	85	32	97	55	7	34	18	134	257	37	182	208	157	49	56	21	12	8	119	56	46	88	23	100	151	32	8	146	608	20	386	223	161	48	82	178
OTU_32	k__Bacteria	p__Bacteroidetes	c__Bacteroidia	o__Bacteroidales	f__Muribaculaceae	g__	s__	1724	96	434	278	33	29	431	223	8	11	264	69	238	41	415	699	115	104	264	147	298	86	449	151	2017	162	18	443	397	11	5	85	670	59	519	280	162	113	216	222
OTU_33	k__Bacteria	p__Bacteroidetes	c__Bacteroidia	o__Bacteroidales	f__Muribaculaceae	g__	s__	780	74	129	174	50	28	120	69	14	28	447	224	78	10	302	297	73	56	633	165	538	19	240	38	509	64	23	556	149	12	14	187	333	39	499	224	239	184	180	373
OTU_34	k__Bacteria	p__Bacteroidetes	c__Bacteroidia	o__Bacteroidales	f__Bacteroidaceae	g__Bacteroides	Others	80	17	45	13	6	4	27	344	1	4	21	0	23	9	14	10	100	56	76	9	13	3	88	32	88	65	13	10	17	3	1	24	68	15	4	6	129	8	37	20
OTU_35	k__Bacteria	p__Bacteroidetes	c__Bacteroidia	o__Bacteroidales	f__Muribaculaceae	g__	s__	858	17	123	58	9	12	147	72	5	3	33	13	4	7	131	103	52	95	152	76	264	16	172	21	1137	32	5	47	164	0	4	35	227	16	388	43	164	58	104	87
OTU_36	k__Bacteria	p__Bacteroidetes	c__Bacteroidia	o__Bacteroidales	f__Muribaculaceae	g__	s__	383	109	81	177	73	41	222	650	4	31	278	68	33	10	273	49	139	48	238	138	292	19	114	8	244	338	16	16	76	17	12	253	596	28	139	133	122	42	284	87
OTU_37	k__Bacteria	p__Firmicutes	c__Clostridia	o__Clostridiales	f__Lachnospiraceae	Others	Others	2	78	30	4	401	68	142	91	12	10	37	13	1548	624	236	4	688	462	3	8	309	10	7	264	2	13	179	1130	1201	5	4	19	3	1378	20	1197	7	28	8	7
OTU_38	k__Bacteria	p__Firmicutes	c__Clostridia	o__Clostridiales	f__Lachnospiraceae	g__Lachnoclostridium	s__[Clostridium]_scindens	36	169	29	135	103	109	272	74	104	83	974	3499	554	695	303	69	990	29	77	42	339	477	729	125	79	108	63	529	363	155	360	140	70	204	184	70	227	74	49	160
OTU_39	k__Bacteria	p__Bacteroidetes	c__Bacteroidia	o__Bacteroidales	f__Muribaculaceae	g__	s__	61	17	43	11	12	6	16	24	4	0	72	79	61	4	332	169	5	15	92	1	104	30	41	9	19	124	3	347	152	0	5	80	97	3	155	1901	10	1	3	24
OTU_40	k__Bacteria	p__Firmicutes	c__Clostridia	o__Clostridiales	f__Lachnospiraceae	Others	Others	10	9	1	16	3	1	1	3	0	0	9	6	7	10	5	7	0	1	0	9	1	4	5	4	15	1	0	11	8	19	0	16	2	24	1	16	11	0	13	5
OTU_41	k__Bacteria	p__Bacteroidetes	c__Bacteroidia	o__Bacteroidales	f__Tannerellaceae	g__Parabacteroides	s__Parabacteroides_distasonis	29	1	8	2	0	0	0	6	2	0	4	0	0	0	3	7	3	1	4	3	8	0	3	2	257	1	1	1	12	0	0	1	8	1	2	2	0	0	3	0
OTU_42	k__Bacteria	p__Firmicutes	c__Clostridia	o__Clostridiales	f__Lachnospiraceae	Others	Others	0	0	0	0	0	0	0	0	0	0	0	0	0	1	0	0	0	0	0	0	0	0	0	2	0	1	0	0	0	0	0	0	0	0	0	0	0	0	3	0
OTU_43	k__Bacteria	p__Bacteroidetes	c__Bacteroidia	o__Bacteroidales	f__Muribaculaceae	g__	s__	453	10	21	11	0	0	30	94	0	4	7	17	7	0	6	7	0	11	337	22	0	1	20	0	491	10	1	0	18	4	0	11	29	3	2	11	9	13	4	2
OTU_44	k__Bacteria	p__Bacteroidetes	c__Bacteroidia	o__Bacteroidales	f__Muribaculaceae	g__	s__	417	90	123	69	3	2	158	60	2	3	93	48	61	8	287	138	367	45	302	105	167	48	322	6	855	53	8	145	154	14	5	116	568	4	736	235	51	104	357	38
OTU_45	k__Bacteria	p__Bacteroidetes	c__Bacteroidia	o__Bacteroidales	f__Muribaculaceae	g__	s__	202	64	95	45	47	32	178	755	3	8	197	239	40	6	714	176	67	34	346	70	259	40	239	5	1019	129	31	504	583	47	15	146	926	81	648	1259	197	18	264	177
OTU_46	k__Bacteria	p__Bacteroidetes	c__Bacteroidia	o__Bacteroidales	f__Muribaculaceae	g__	s__	57	11	25	15	42	17	103	691	7	4	66	35	11	20	374	263	37	98	221	18	122	31	325	75	319	229	28	91	61	9	14	279	352	115	574	194	138	51	110	63
OTU_47	k__Bacteria	p__Firmicutes	c__Clostridia	o__Clostridiales	f__Lachnospiraceae	Others	Others	0	3	3	0	4	2	15	3	567	3	134	0	23	7	76	632	36	5	7	15	2	2	1	12	1	4	142	69	2	626	108	10	7	7	262	153	5	293	6	60
OTU_48	k__Bacteria	p__Firmicutes	c__Clostridia	o__Clostridiales	f__Lachnospiraceae	g__Lachnoclostridium	Others	36	142	5	166	15	21	25	8	104	119	573	24	459	221	22	298	99	5	24	88	17	109	96	302	0	12	23	122	467	65	106	13	16	22	127	79	2	494	93	1580
OTU_49	k__Bacteria	p__Firmicutes	c__Clostridia	o__Clostridiales	f__Ruminococcaceae	g__Intestinimonas	Others	0	0	0	1	2	5	514	9	60	3	27	599	4	635	22	3	77	723	0	5	33	56	1	1271	3	2	150	5	20	9	83	1	2	6	233	2	9	227	9	3
OTU_50	k__Bacteria	p__Bacteroidetes	c__Bacteroidia	o__Bacteroidales	f__Muribaculaceae	g__	s__	126	5	13	12	15	4	144	278	1	0	145	16	6	4	628	76	4	39	64	26	306	4	197	5	49	23	11	21	15	4	1	35	1020	53	1413	188	26	5	74	16
OTU_51	k__Bacteria	p__Firmicutes	c__Clostridia	o__Clostridiales	f__Ruminococcaceae	Others	Others	0	1	1	2	3	8	0	0	1	0	0	5	0	0	0	0	13	3	18	55	0	0	2	0	0	0	80	2	2	1	50	0	11	0	139	45	0	0	252	7
OTU_52	k__Bacteria	p__Bacteroidetes	c__Bacteroidia	o__Bacteroidales	f__Muribaculaceae	g__	s__	112	25	53	49	20	20	103	32	1	2	63	63	61	30	423	106	131	29	63	46	150	11	203	16	178	86	15	202	173	7	9	168	232	25	571	284	33	19	95	269
OTU_53	k__Bacteria	p__Actinobacteria	c__unidentified_Actinobacteria	o__Bifidobacteriales	f__Bifidobacteriaceae	g__Bifidobacterium	Others	11	35	8	20	4	4	54	37	66	341	18	20	5	78	0	0	2	16	151	94	3	9	44	274	0	22	10177	2	3	163	20	111	7	6	0	15	40	58	368	22
OTU_54	k__Bacteria	p__Firmicutes	c__Clostridia	o__Clostridiales	f__Ruminococcaceae	g__unidentified_Ruminococcaceae	Others	102	154	123	19	90	23	108	41	4	33	29	39	647	23	185	302	58	42	233	61	20	32	150	76	39	29	19	30	158	16	47	49	34	112	245	198	154	91	177	18
OTU_55	k__Bacteria	p__Bacteroidetes	c__Bacteroidia	o__Bacteroidales	f__Tannerellaceae	g__Parabacteroides	Others	0	0	0	0	0	0	0	40	0	0	9	17	0	0	0	0	0	0	0	0	0	0	0	0	0	0	0	0	0	0	0	0	0	0	0	1	0	0	0	0
OTU_56	k__Bacteria	p__Bacteroidetes	c__Bacteroidia	o__Bacteroidales	f__Marinifilaceae	g__Odoribacter	s__	0	0	0	0	0	0	0	5	0	0	0	0	0	0	0	0	0	0	1	0	0	0	0	0	0	0	0	0	1	0	0	0	0	0	1	3	0	0	0	0
OTU_57	k__Bacteria	p__Actinobacteria	c__Coriobacteriia	o__Coriobacteriales	f__Atopobiaceae	g__	s__	147	304	291	417	4	4	60	7	1	53	24	2	6	353	2	0	49	23	6	1097	54	75	6	720	1	2	3	11	68	5	2	4	3	5	2	4	411	641	1451	9
OTU_58	k__Bacteria	p__Firmicutes	c__Clostridia	o__Clostridiales	f__Lachnospiraceae	g__Roseburia	Others	50	3	2	45	5	0	5	198	0	0	1	4	28	63	1627	163	2206	5	0	212	622	13	4	26	5	0	0	1946	14	2	0	27	3	104	99	20	7	13	235	21
OTU_59	k__Bacteria	p__Bacteroidetes	c__Bacteroidia	o__Bacteroidales	f__Muribaculaceae	g__	s__	162	17	8	29	72	30	54	849	2	8	88	105	21	14	124	516	1	19	424	42	73	16	142	81	54	125	58	116	105	16	5	183	168	62	96	9	212	36	86	24
OTU_60	k__Bacteria	p__Firmicutes	c__Erysipelotrichia	o__Erysipelotrichales	f__Erysipelotrichaceae	Others	Others	255	20	61	97	49	22	94	74	20	43	393	71	149	138	162	265	622	7	5	170	619	382	18	264	84	71	48	1294	167	84	22	784	1845	384	2	42	2	7	469	981
OTU_61	k__Bacteria	p__Bacteroidetes	c__Bacteroidia	o__Bacteroidales	f__Muribaculaceae	g__	s__	137	4	12	17	0	2	19	64	0	0	4	27	0	0	39	62	3	15	76	6	25	1	23	2	185	6	4	32	31	2	0	27	20	8	123	13	20	5	11	4
OTU_62	k__Bacteria	p__Firmicutes	c__Clostridia	o__Clostridiales	f__Lachnospiraceae	Others	Others	0	0	0	0	0	0	0	0	0	0	0	0	0	0	0	0	22	0	0	0	0	0	0	0	0	0	0	0	1	0	0	0	0	0	0	0	0	0	0	0
OTU_63	k__Bacteria	p__unidentified_Bacteria	c__unidentified_Bacteria	o__Campylobacterales	f__Helicobacteraceae	g__Helicobacter	s__Helicobacter_hepaticus	0	0	0	0	0	0	0	2	0	0	0	0	0	0	0	0	0	0	0	0	0	0	0	0	0	0	0	0	0	0	0	0	0	0	0	0	0	0	0	0
OTU_64	k__Bacteria	p__Proteobacteria	c__Alphaproteobacteria	o__Rhodospirillales	f__	g__	s__	0	0	0	0	0	0	2	0	0	0	0	0	0	0	0	8	0	0	0	0	0	0	2	0	28	0	0	0	0	0	0	0	0	0	0	0	0	0	0	0
OTU_65	k__Bacteria	p__Firmicutes	c__Clostridia	o__Clostridiales	f__Lachnospiraceae	g__unidentified_Lachnospiraceae	s__Lachnospiraceae_bacterium_DW17	59	82	23	74	95	37	69	60	19	31	99	2190	75	39	133	24	61	1	51	49	15	121	103	16	47	137	2	655	391	13	38	154	114	89	10	7	28	21	84	93
OTU_66	k__Bacteria	p__Firmicutes	c__Clostridia	o__Clostridiales	f__Lachnospiraceae	Others	Others	7	28	24	19	41	83	11	49	24	73	11	52	268	6	79	137	698	1	2	5	12	20	39	7	27	27	29	2339	396	730	28	39	17	120	24	113	507	5	8	131
OTU_67	k__Bacteria	p__Bacteroidetes	c__Bacteroidia	o__Bacteroidales	f__Muribaculaceae	g__	s__	219	38	51	28	16	9	47	71	1	1	14	78	7	3	41	32	38	14	254	25	35	19	123	12	199	78	18	31	108	9	5	44	133	18	139	102	58	39	72	27
OTU_68	k__Bacteria	p__Bacteroidetes	c__Bacteroidia	o__Bacteroidales	f__Muribaculaceae	g__	s__	61	9	28	10	1	2	138	97	4	2	41	9	18	15	269	305	23	213	348	22	62	20	141	88	574	107	34	112	144	10	22	59	247	8	831	116	134	49	94	82
OTU_69	k__Bacteria	p__Firmicutes	c__Clostridia	o__Clostridiales	f__Lachnospiraceae	Others	Others	12	0	9	7	15	8	26	5	0	3	0	4	69	113	30	9	8	1	0	2	1	0	0	0	17	0	0	24	6	4	11	3	7	7	24	8	0	0	2	3
OTU_70	k__Bacteria	p__Bacteroidetes	c__Bacteroidia	o__Bacteroidales	f__Bacteroidaceae	g__Bacteroides	Others	192	42	63	6	2	2	33	547	2	4	24	15	19	1	10	35	4	21	267	7	2	1	74	6	2906	12	1	10	19	3	0	13	88	19	8	7	16	20	8	10
OTU_71	k__Bacteria	p__Firmicutes	c__Clostridia	o__Clostridiales	f__Lachnospiraceae	g__unidentified_Lachnospiraceae	s__Clostridium_sp_Culture-41	44	42	13	30	7	5	21	14	3	38	23	12	201	29	149	9	169	5	33	28	47	6	579	24	7	69	7	981	249	17	11	275	295	24	264	49	19	7	49	19
OTU_72	k__Bacteria	p__Actinobacteria	c__Coriobacteriia	o__Coriobacteriales	f__Eggerthellaceae	g__Enterorhabdus	Others	56	44	54	146	128	88	74	88	71	54	357	314	226	75	63	260	97	39	40	102	68	289	243	32	66	227	8	567	123	149	103	323	78	119	58	5	48	135	84	149
OTU_73	k__Bacteria	p__Firmicutes	c__Clostridia	o__Clostridiales	f__Ruminococcaceae	g__unidentified_Ruminococcaceae	Others	76	30	41	44	32	34	29	38	14	4	63	58	49	31	54	122	24	41	76	45	68	17	18	52	217	55	22	79	108	30	45	120	159	64	81	46	139	120	142	262
OTU_74	k__Bacteria	p__Firmicutes	c__Clostridia	o__Clostridiales	f__Lachnospiraceae	Others	Others	4	21	6	8	27	17	3	21	0	9	18	184	255	10	20	4	208	0	0	2	9	5	2	11	1	7	7	53	24	24	3	112	24	49	0	0	11	47	0	10
OTU_75	k__Bacteria	p__Proteobacteria	c__Gammaproteobacteria	o__unidentified_Gammaproteobacteria	f__Burkholderiaceae	g__Parasutterella	s__	325	29	244	150	69	21	88	45	7	8	294	9	109	7	199	12	75	51	13	73	265	18	73	12	72	93	3	64	4	0	4	51	182	132	40	5	29	25	127	12
OTU_76	k__Bacteria	p__Firmicutes	c__Clostridia	o__Clostridiales	f__Ruminococcaceae	g__unidentified_Ruminococcaceae	Others	3	0	5	0	113	13	20	37	8	60	66	0	276	23	6	16	56	0	107	9	3	57	411	18	17	90	25	39	39	11	53	28	2	6	10	32	12	58	29	11
OTU_77	k__Bacteria	p__Firmicutes	c__Bacilli	o__Bacillales	f__Staphylococcaceae	g__Staphylococcus	s__Staphylococcus_lentus	3	59	4	3	27	6	1	6	6	7	6	3	8	49	1	8	4	9	9	6	11	35	25	14	556	6	0	14	12	12	5	6	0	9	4	0	0	1	8	3
OTU_78	k__Bacteria	p__Firmicutes	c__Clostridia	o__Clostridiales	f__Ruminococcaceae	Others	Others	16	6	40	8	128	66	46	11	17	128	64	7	357	33	55	8	47	54	41	0	8	91	264	91	18	14	11	10	84	59	86	21	8	50	39	13	24	403	0	29
OTU_79	k__Bacteria	p__Firmicutes	c__Clostridia	o__Clostridiales	f__Lachnospiraceae	g__Roseburia	Others	5	2	10	0	37	10	2093	5	244	8	354	10	3691	6	2	19	3	7	5	2	0	3	2908	6	0	524	12	6	591	3	3	12	0	4	5	42	7	4	3	11
OTU_80	k__Bacteria	p__Bacteroidetes	c__Bacteroidia	o__Bacteroidales	f__Muribaculaceae	Others	Others	123	6	34	6	13	8	2	317	2	14	4	5	1	1	48	9	5	20	282	113	20	10	20	7	49	10	16	2	8	6	2	20	192	68	153	28	129	37	227	5
OTU_81	k__Bacteria	p__Firmicutes	c__Clostridia	o__Clostridiales	f__Ruminococcaceae	Others	Others	0	99	2	0	0	0	0	0	0	0	0	3	0	2	292	0	3	0	1	0	129	0	122	0	0	2	0	0	0	3	0	0	0	0	2	0	0	0	2	0
OTU_82	k__Bacteria	p__Firmicutes	c__Clostridia	o__Clostridiales	f__Ruminococcaceae	g__unidentified_Ruminococcaceae	Others	0	2	5	3	3	1	34	6	3	963	73	8	27	6	696	30	18	4	9	345	43	9	2	16	1322	6	3	13	16	5	1	2	39	2	212	29	0	71	279	4
OTU_83	k__Bacteria	p__Verrucomicrobia	c__Verrucomicrobiae	o__Verrucomicrobiales	f__Akkermansiaceae	g__Akkermansia	s__Akkermansia_muciniphila	3	0	34	16	4	7	192	458	51	2	672	142	1	2	6	0	38	0	4	3	760	122	473	17	0	377	144	1135	64	4	124	0	271	1	0	4	377	20	12	1
OTU_84	k__Bacteria	p__Bacteroidetes	c__Bacteroidia	o__Bacteroidales	f__Prevotellaceae	g__Alloprevotella	s__	0	0	5	0	0	0	2	102	0	11	195	1	0	0	16	0	0	0	304	0	219	0	84	1	0	1	2	0	1	36	0	64	1387	0	0	11	0	0	0	0
OTU_85	k__Bacteria	p__Firmicutes	c__Clostridia	o__Clostridiales	f__Lachnospiraceae	g__Lachnoclostridium	s__	48	103	19	53	5	10	143	14	23	40	82	18	135	19	296	120	35	34	12	127	74	22	25	28	169	99	39	45	352	18	64	173	310	42	264	142	81	133	101	353
OTU_86	k__Bacteria	p__Firmicutes	c__Clostridia	o__Clostridiales	f__Lachnospiraceae	g__Blautia	s__Lachnospiraceae_bacterium_609	46	51	12	94	2	2	42	3	1	38	11	5	426	0	521	40	44	149	3	4	45	3	2	4	22	3	0	7	102	38	274	25	172	45	8	68	533	110	3	11
OTU_87	k__Bacteria	p__Firmicutes	c__Clostridia	o__Clostridiales	f__Lachnospiraceae	Others	Others	2	2	1	2	2	2	18	6	1	6	15	243	5	36	177	0	11	69	1	4	0	3	28	148	91	3	4	700	23	5	9	1193	151	2	139	41	5	11	22	22
OTU_88	k__Bacteria	p__Firmicutes	c__Clostridia	o__Clostridiales	f__Ruminococcaceae	Others	Others	52	9	78	74	52	18	81	81	6	45	283	119	1024	43	262	63	56	38	109	48	9	11	17	93	4	69	59	183	204	282	56	139	102	22	65	132	16	80	89	137
OTU_89	k__Bacteria	p__Firmicutes	c__Clostridia	o__Clostridiales	f__Ruminococcaceae	g__unidentified_Ruminococcaceae	Others	0	12	8	0	0	0	0	7	34	0	0	0	0	0	1215	2	0	1	0	23	17	0	0	0	0	15	41	1	22	143	4	242	2	0	1	0	63	0	26	0
OTU_90	k__Bacteria	p__Bacteroidetes	c__Bacteroidia	o__Bacteroidales	f__	g__	s__	0	0	0	0	1	4042	0	14	0	0	0	0	2	1	0	0	0	0	1	0	0	3	0	1	0	0	1	0	0	3	2	2	0	1	0	0	1	5	0	0
OTU_91	k__Bacteria	p__Bacteroidetes	c__Bacteroidia	o__Bacteroidales	f__Marinifilaceae	g__Odoribacter	s__	2	0	0	0	15	11	29	49	12	2	12	0	0	2	0	0	0	0	531	94	0	0	37	0	0	47	16	1	0	8	6	63	118	19	0	0	174	85	58	1
OTU_92	k__Bacteria	p__Firmicutes	c__Clostridia	o__Clostridiales	f__Lachnospiraceae	Others	Others	8	0	1	2	83	64	71	41	53	20	123	5	334	997	0	1	114	66	6	17	29	11	2	262	0	39	28	70	24	1	4	5	41	71	354	10	2	78	52	44
OTU_93	k__Bacteria	p__Firmicutes	c__Clostridia	o__Clostridiales	f__Lachnospiraceae	g__unidentified_Lachnospiraceae	s__Lachnospiraceae_bacterium_DW67	434	112	212	124	42	7	42	42	4	12	47	28	140	110	41	47	45	15	14	8	3	7	56	105	158	9	6	46	45	15	27	22	13	28	558	14	30	14	4	8
OTU_94	k__Bacteria	p__unidentified_Bacteria	c__unidentified_Bacteria	o__unidentified_Bacteria	f__unidentified_Bacteria	g__Candidatus_Saccharimonas	s__	112	7	25	64	64	88	9	39	29	13	10	24	144	134	27	53	10	19	134	9	18	179	125	18	14	71	43	248	508	64	14	9	3	1	28	9	242	41	9	172
OTU_95	k__Bacteria	p__Firmicutes	c__Erysipelotrichia	o__Erysipelotrichales	f__Erysipelotrichaceae	g__Erysipelatoclostridium	s__	31	1	6	21	10	7	24	11	4	1	14	0	294	49	141	186	3	4	1	4	35	40	22	4	4	36	4	32	25	37	4	160	104	6	52	8	25	1	6	99
OTU_96	k__Bacteria	p__Firmicutes	c__Clostridia	o__Clostridiales	f__Ruminococcaceae	g__Caproiciproducens	Others	39	17	14	25	58	45	35	50	26	20	55	86	158	171	29	54	42	33	26	64	9	24	91	60	19	51	18	74	103	53	69	192	31	40	45	28	41	55	45	40
OTU_97	k__Bacteria	p__Proteobacteria	c__Alphaproteobacteria	o__Rhizobiales	f__Rhizobiaceae	g__Phyllobacterium	Others	10	4	5	1	3	0	6	4	0	6	5	49	19	95	32	5	34	8	4	1	5	1716	23	13	13	22	34	61	37	10	4	323	17	0	6	65	8	56	226	30
OTU_98	k__Bacteria	p__Firmicutes	c__Clostridia	o__Clostridiales	f__Lachnospiraceae	Others	Others	61	0	1	41	0	3	0	0	0	0	1	0	0	23	58	0	129	0	0	0	12	31	0	0	2	0	0	0	505	0	0	0	0	0	4	0	2	0	0	4
OTU_99	k__Bacteria	p__Firmicutes	c__Clostridia	o__Clostridiales	f__Ruminococcaceae	Others	Others	4	2	1	2	2	3	69	14	44	9	35	9	40	105	3	237	4	14	144	3	27	265	207	123	0	89	6	151	48	0	3	14	42	0	13	5	0	7	0	453
OTU_100	k__Bacteria	p__Firmicutes	c__Clostridia	o__Clostridiales	f__Lachnospiraceae	Others	Others	28	46	23	33	9	7	69	8	13	18	27	33	119	134	29	51	35	14	11	6	4	3	48	131	23	12	7	60	36	6	11	38	27	41	56	2	19	21	11	27
OTU_101	k__Bacteria	p__Bacteroidetes	c__Bacteroidia	o__Bacteroidales	f__Muribaculaceae	g__	s__	6	4	2	4	4	3	7	79	0	10	24	68	0	1	105	17	5	4	250	8	43	3	34	0	260	6	1	8	21	19	0	116	62	1	41	14	34	8	13	11
OTU_102	k__Bacteria	p__Firmicutes	c__Clostridia	o__Clostridiales	f__Ruminococcaceae	g__unidentified_Ruminococcaceae	s__[Clostridium]_papyrosolvens	0	0	0	0	2	3	5	3	14	1	174	0	26	21	1	30	6	6	121	2	0	64	34	10	0	1	0	8	16	0	0	0	0	0	14	12	1	26	3	112
OTU_103	k__Bacteria	p__Bacteroidetes	c__Bacteroidia	o__Bacteroidales	f__Muribaculaceae	g__	s__	0	0	0	0	0	0	0	0	2	3	0	0	0	0	0	0	0	0	0	0	0	0	0	0	0	0	0	0	0	0	0	0	0	0	0	0	0	0	0	0
OTU_104	k__Bacteria	p__Firmicutes	c__Clostridia	o__Clostridiales	f__Lachnospiraceae	g__unidentified_Lachnospiraceae	s__Clostridium_sp_Culture-54	5	26	11	21	2	0	15	0	3	19	23	61	15	12	3	39	12	9	2	1	3	7	5	9	19	20	0	51	13	7	56	38	13	4	2	2	0	3	1	11
OTU_105	k__Bacteria	p__Firmicutes	c__Clostridia	o__Clostridiales	f__Lachnospiraceae	Others	Others	3	1	0	0	55	26	50	14	166	34	54	32	3	5	64	157	491	33	54	1	66	4	1	10	1	655	38	118	138	103	2	724	0	3	30	58	2	6	3	7
OTU_106	k__Bacteria	p__Proteobacteria	c__Gammaproteobacteria	o__Enterobacteriales	f__Enterobacteriaceae	g__unidentified_Enterobacteriaceae	s__Escherichia_coli	2	3	15	1	2	1	26	139	2	0	4	5	0	15	1	0	0	5	0	1	1	0	27	0	5	20	36	2	2	0	0	2	0	1	2	0	0	2	59	2
OTU_108	k__Bacteria	p__Firmicutes	c__Clostridia	o__Clostridiales	f__Lachnospiraceae	g__Roseburia	s__	42	18	25	37	3	0	7	14	6	0	10	2	76	3	229	49	27	11	5	31	10	0	3	20	73	79	12	32	44	0	9	163	15	88	51	36	3	5	152	4
OTU_109	k__Bacteria	p__Firmicutes	c__Clostridia	o__Clostridiales	f__Lachnospiraceae	Others	Others	2	297	23	14	3	60	9	48	2	78	8	3	217	72	436	3	8	1	4	142	91	4	0	9	1	1	0	381	255	0	9	109	67	83	18	138	2	3	253	0
OTU_110	k__Bacteria	p__Firmicutes	c__Clostridia	o__Clostridiales	f__Ruminococcaceae	g__unidentified_Ruminococcaceae	s__Firmicutes_bacterium_ASF500	178	74	68	47	108	50	94	76	0	13	44	80	167	78	63	126	59	16	26	13	3	17	11	88	35	23	23	53	99	73	31	89	27	275	226	238	27	27	51	49
OTU_111	k__Bacteria	p__Actinobacteria	c__Coriobacteriia	o__Coriobacteriales	f__Eggerthellaceae	g__Gordonibacter	s__	8	58	26	20	27	38	23	12	15	83	13	4	20	15	80	99	108	28	16	71	177	399	18	10	3	5	7	74	51	0	27	7	0	19	9	83	19	93	57	111
OTU_112	k__Bacteria	p__Firmicutes	c__Clostridia	o__Clostridiales	f__Lachnospiraceae	g__Roseburia	Others	12	1	2	13	0	0	58	5	2	0	12	2	78	0	39	24	27	1	0	16	7	49	5	0	0	2	5	32	7	9	0	13	11	2	9	0	5	2	13	3283
OTU_113	k__Bacteria	p__Firmicutes	c__Clostridia	o__Clostridiales	f__Lachnospiraceae	Others	Others	6	33	11	2	3	0	193	10	3	0	233	3	140	17	0	108	2	3	10	9	0	49	36	71	2	84	14	0	4	1	2	13	1	34	2	49	3	91	26	51
OTU_114	k__Bacteria	p__Bacteroidetes	c__Bacteroidia	o__Bacteroidales	f__Muribaculaceae	g__	s__	86	5	20	17	8	4	6	45	0	4	13	25	27	0	93	131	24	14	64	32	68	8	126	8	248	34	9	47	61	6	3	58	197	13	129	83	159	15	110	40
OTU_115	k__Bacteria	p__Firmicutes	c__Clostridia	o__Clostridiales	f__unidentified_Clostridiales	g__Candidatus_Arthromitus	Others	9	7	7	9	6	0	11	0	0	7	72	615	131	25	6	313	6	0	7	2	0	119	43	0	1	2	0	125	27	1	4	0	0	0	57	13	0	3	1	10
OTU_116	k__Bacteria	p__Actinobacteria	c__unidentified_Actinobacteria	o__Corynebacteriales	f__Corynebacteriaceae	g__unidentified_Corynebacteriaceae	s__Corynebacterium_stationis	0	1	0	0	11	0	0	1	2	4	0	0	0	0	0	0	3	0	0	0	8	26	1	0	67	0	0	2	0	0	0	0	0	0	0	0	0	0	0	0
OTU_117	k__Bacteria	p__Tenericutes	c__Mollicutes	o__	f__	g__	s__	8	6	11	2	5	11	2	6	36	8	18	0	461	14	10	242	1	16	18	0	0	93	79	9	135	303	3	12	71	1	7	0	3	0	10	5	0	36	2	223
OTU_118	k__Bacteria	p__Bacteroidetes	c__Bacteroidia	o__Bacteroidales	f__Rikenellaceae	g__Alistipes	s__	117	13	14	9	25	27	2	63	3	2	4	63	17	16	79	2	41	11	312	5	11	22	24	8	3	16	7	39	79	3	0	182	2	5	58	96	40	50	2	2
OTU_119	k__Bacteria	p__Firmicutes	c__Clostridia	o__Clostridiales	f__Lachnospiraceae	Others	Others	20	37	11	28	72	20	35	19	4	0	14	4	312	37	58	4	34	32	21	34	5	20	2	119	17	9	2	89	12	27	32	15	21	10	13	24	4	30	52	83
OTU_120	k__Bacteria	p__Actinobacteria	c__Coriobacteriia	o__Coriobacteriales	f__Eggerthellaceae	g__Enterorhabdus	s__	9	28	22	65	17	49	14	16	10	26	53	565	5	71	76	9	42	13	30	21	101	94	31	35	1	20	5	160	176	96	27	103	23	15	9	7	63	45	10	92
OTU_121	k__Bacteria	p__Firmicutes	c__Clostridia	o__Clostridiales	f__Ruminococcaceae	g__unidentified_Ruminococcaceae	s__Clostridium_sp_MC_40	0	0	0	0	3	0	4	3	1	0	0	0	0	4	3	3	5	0	0	0	0	0	0	0	11	0	0	0	15	2	0	0	0	0	1	10	2	1443	0	0
OTU_122	k__Bacteria	p__Firmicutes	c__Bacilli	o__Lactobacillales	f__Streptococcaceae	g__Streptococcus	s__Streptococcus_danieliae	9	20	10	16	5	8	37	7	8	37	111	45	174	44	12	70	33	5	26	37	22	65	74	14	12	16	21	129	35	86	12	78	5	33	12	20	8	3	14	68
OTU_123	k__Bacteria	p__Firmicutes	c__Clostridia	o__Clostridiales	f__Lachnospiraceae	Others	Others	8	3	3	29	4	9	166	5	3	1	57	273	18	65	32	6	97	11	7	61	20	27	161	73	23	5	0	244	173	131	21	74	29	5	75	4	1	17	23	1
OTU_124	k__Bacteria	p__Firmicutes	c__Clostridia	o__Clostridiales	f__Lachnospiraceae	Others	Others	5	0	1	21	5	8	7	10	0	19	26	16	16	2755	0	0	0	39	0	3	0	94	3	449	0	2	2	0	0	3	0	5	0	4	0	3	0	411	2	17
OTU_125	k__Bacteria	p__Firmicutes	c__Clostridia	o__Clostridiales	f__unidentified_Clostridiales	g__unidentified_Clostridiales	Others	8	6	2	1	9	9	16	3	2	5	119	5	96	13	27	31	2	7	20	4	2	6	20	7	17	5	7	35	22	22	11	27	10	7	25	8	13	4	7	24
OTU_126	k__Bacteria	p__Firmicutes	c__Clostridia	o__Clostridiales	f__Lachnospiraceae	g__Marvinbryantia	s__	64	49	8	52	10	11	0	19	3	2	210	11	34	26	26	453	3	0	2	2	6	31	63	9	6	1	3	55	28	19	20	10	171	359	108	123	10	0	10	79
OTU_127	k__Bacteria	p__Firmicutes	c__Clostridia	o__Clostridiales	f__Lachnospiraceae	Others	Others	2	11	9	25	36	27	25	4	26	50	2	51	48	55	38	43	8	27	44	36	7	4	5	80	0	16	24	21	95	11	62	60	8	65	89	114	3	0	33	85
OTU_128	k__Bacteria	p__Firmicutes	c__Clostridia	o__Clostridiales	f__Lachnospiraceae	g__	s__	0	27	6	0	2	0	16	3	0	1	0	3	4	2	0	16	0	0	0	0	1	1	0	2	29	0	0	0	1	26	0	0	5	0	0	149	0	0	0	2
OTU_129	k__Bacteria	p__Firmicutes	c__Clostridia	o__Clostridiales	f__Lachnospiraceae	g__unidentified_Lachnospiraceae	s__Lachnospiraceae_bacterium_A4	8	3	7	5	0	0	92	27	3	1	7	7	97	46	413	251	5	8	3	0	59	6	5	7	94	41	14	85	88	1	3	333	98	27	224	252	2	28	3	26
OTU_130	k__Bacteria	p__Firmicutes	c__Clostridia	o__Clostridiales	f__Ruminococcaceae	Others	Others	3	0	17	4	12	17	22	14	19	14	98	40	102	101	28	84	42	27	241	14	13	30	20	24	353	31	5	35	193	163	5	96	21	31	29	14	8	50	17	614
OTU_131	k__Bacteria	p__Bacteroidetes	c__Bacteroidia	o__Bacteroidales	f__Muribaculaceae	g__	s__	52	9	46	11	9	5	13	16	2	0	6	8	4	0	31	8	2	8	101	24	12	1	13	1	68	24	5	26	18	0	0	39	109	5	8	26	16	3	32	1
OTU_132	k__Bacteria	p__Actinobacteria	c__Coriobacteriia	o__Coriobacteriales	f__Eggerthellaceae	g__Enterorhabdus	s__	25	11	8	37	3	7	7	8	23	28	36	81	70	14	18	4	28	3	20	5	60	63	38	4	17	13	3	28	94	6	29	18	32	5	18	16	8	16	16	39
OTU_133	k__Bacteria	p__Firmicutes	c__Clostridia	o__Clostridiales	f__Ruminococcaceae	g__unidentified_Ruminococcaceae	Others	47	8	14	16	30	13	98	21	14	9	30	0	64	15	26	45	4	25	26	0	2	96	19	43	10	8	6	47	89	5	0	23	12	6	22	10	2	43	2	29
OTU_134	k__Bacteria	p__Firmicutes	c__Clostridia	o__Clostridiales	f__Ruminococcaceae	Others	Others	9	3	15	4	6	72	3	2	0	19	79	98	17	18	1	12	2	0	88	2	1	6	136	7	2	26	1	32	10	82	43	203	209	1	0	0	16	0	3	30
OTU_135	k__Bacteria	p__Bacteroidetes	c__Bacteroidia	o__Bacteroidales	f__Prevotellaceae	g__Paraprevotella	Others	0	0	0	0	0	0	0	4	0	0	0	0	0	0	0	0	0	0	0	0	0	0	0	0	0	0	0	0	0	0	0	0	0	0	0	0	0	0	0	0
OTU_136	k__Bacteria	p__Firmicutes	c__Clostridia	o__Clostridiales	f__Lachnospiraceae	Others	Others	24	14	18	54	13	7	51	2	36	0	15	20	133	130	18	99	20	12	9	17	9	39	34	34	26	15	2	65	93	24	78	13	3	11	30	22	7	48	37	28
OTU_138	k__Bacteria	p__Firmicutes	c__Bacilli	o__Lactobacillales	f__Enterococcaceae	g__Enterococcus	s__Enterococcus_durans	0	0	3	0	0	0	4	4	0	18	2	13	1	5	0	2	0	0	2	4	0	1	10	0	9	6	5	1	11	32	0	26	0	1	0	0	0	0	1	4
OTU_139	k__Bacteria	p__Bacteroidetes	c__Bacteroidia	o__Bacteroidales	f__Rikenellaceae	g__Alistipes	Others	26	8	10	1	9	1	7	4	2	3	7	19	3	7	14	15	18	1	39	5	30	6	15	4	95	13	2	7	54	4	0	33	20	3	79	12	27	41	15	30
OTU_140	k__Bacteria	p__Firmicutes	c__Clostridia	o__Clostridiales	f__Ruminococcaceae	Others	Others	74	37	19	13	9	0	29	5	0	1	5	22	10	1	26	46	1	3	23	5	5	0	8	3	4	0	3	6	6	3	1	15	29	72	24	42	8	4	12	2
OTU_141	k__Bacteria	p__Actinobacteria	c__Coriobacteriia	o__Coriobacteriales	f__Eggerthellaceae	g__Enterorhabdus	s__	2	1	2	0	18	6	9	21	3	15	6	17	33	16	40	26	118	5	1	21	47	98	4	4	6	6	2	81	39	7	3	45	17	16	63	11	12	19	18	16
OTU_142	k__Bacteria	p__Firmicutes	c__Clostridia	o__Clostridiales	f__Ruminococcaceae	Others	Others	0	1	72	3	45	14	20	32	1	25	2	30	15	6	29	26	16	18	34	6	7	7	3	10	33	8	10	8	83	22	3	63	145	22	124	25	53	6	11	11
OTU_143	k__Bacteria	p__Firmicutes	c__Clostridia	o__Clostridiales	f__unidentified_Clostridiales	g__unidentified_Clostridiales	Others	26	11	20	17	20	13	3	17	5	5	84	22	504	12	27	63	15	15	17	47	16	11	1	11	48	48	10	75	131	29	20	59	58	26	81	76	50	19	132	99
OTU_144	k__Bacteria	p__Bacteroidetes	c__Bacteroidia	o__Bacteroidales	f__Muribaculaceae	g__	s__	39	12	26	8	15	17	4	716	0	12	102	22	0	3	49	40	11	122	125	1	5	0	233	21	109	6	3	8	21	9	0	29	166	12	100	118	0	0	4	0
OTU_145	k__Bacteria	p__Bacteroidetes	c__Bacteroidia	o__Bacteroidales	f__Marinifilaceae	g__Odoribacter	s__	167	18	29	24	0	1	3	3	0	2	0	71	11	1	45	2	8	1	68	3	2	10	4	0	0	6	0	6	1	0	0	11	10	2	31	44	12	10	2	6
OTU_146	k__Bacteria	p__Bacteroidetes	c__Bacteroidia	o__Bacteroidales	f__Muribaculaceae	g__	s__	55	10	16	13	40	8	9	40	0	0	29	17	11	2	15	19	8	32	119	13	40	4	64	0	41	6	10	13	24	3	4	10	30	12	24	14	75	25	27	25
OTU_147	k__Bacteria	p__Firmicutes	c__Clostridia	o__Clostridiales	f__Lachnospiraceae	Others	Others	3	1	0	0	0	0	20	7	0	0	0	1	12	6	1	7	3	9	0	0	0	2	0	2	2	0	0	3	2	0	0	0	5	0	1226	12	4	0	1	3
OTU_148	k__Bacteria	p__Firmicutes	c__Clostridia	o__Clostridiales	f__Lachnospiraceae	Others	Others	16	7	3	30	5	5	125	5	32	47	342	0	73	113	13	125	63	31	8	1	36	91	20	44	3	15	0	21	40	5	6	24	83	14	24	5	0	73	0	674
OTU_149	k__Bacteria	p__Firmicutes	c__Clostridia	o__Clostridiales	f__Ruminococcaceae	Others	Others	515	91	58	606	144	49	104	2	14	12	1	0	0	27	4	24	1	1	8	0	0	30	14	1	2	2	4	9	20	0	0	0	0	0	5	4	0	1	0	36
OTU_150	k__Bacteria	p__Proteobacteria	c__Deltaproteobacteria	o__Desulfovibrionales	f__Desulfovibrionaceae	g__Desulfovibrio	Others	0	0	0	8	2	7	3	6	8	15	23	174	643	14	11	4	63	3	163	11	2	1	6	8	3	59	17	9	37	10	25	21	3	3	9	367	282	8	12	102
OTU_151	k__Bacteria	p__Firmicutes	c__Clostridia	o__Clostridiales	f__Ruminococcaceae	g__unidentified_Ruminococcaceae	s__[Clostridium]_papyrosolvens	0	4	22	2	1	0	47	0	4	2	163	4	3	5	0	0	3	25	415	0	3	76	4	36	0	0	0	1	5	0	0	2	0	2	36	44	4	4	4	521
OTU_152	k__Bacteria	p__Firmicutes	c__Clostridia	o__Clostridiales	f__Lachnospiraceae	g__Roseburia	Others	2	0	0	2	0	0	0	0	7	1	6	0	5	14	0	13	0	13	0	4	0	12	0	7	0	12	34	0	0	0	0	0	19	0	0	0	0	30	0	0
OTU_153	k__Bacteria	p__Firmicutes	c__Erysipelotrichia	o__Erysipelotrichales	f__Erysipelotrichaceae	g__Candidatus_Stoquefichus	s__	2	0	10	3	3	3	9	2	3	5	26	3	72	52	104	42	0	3	6	17	12	4	44	35	13	9	1	132	8	57	0	8	26	1	2	0	2	2	38	0
OTU_154	k__Bacteria	p__Firmicutes	c__Clostridia	o__Clostridiales	f__Lachnospiraceae	Others	Others	0	0	0	0	0	2	1	4	20	41	0	0	1	5	1	0	2	0	0	0	0	0	0	4	0	4	3	0	95	1	0	2	0	0	0	2	5	11	0	196
OTU_155	k__Bacteria	p__Firmicutes	c__Clostridia	o__Clostridiales	f__Lachnospiraceae	Others	Others	6	9	1	18	16	11	5	13	7	15	232	378	57	26	33	34	10	16	26	17	23	26	64	9	26	6	13	128	67	84	211	188	10	13	62	40	16	53	30	76
OTU_156	k__Bacteria	p__Bacteroidetes	c__Bacteroidia	o__Bacteroidales	f__Rikenellaceae	g__Rikenella	s__	194	3	5	8	6	1	6	0	0	1	6	10	2	0	16	1	10	1	46	13	8	2	17	0	0	9	1	9	40	1	1	17	10	3	14	41	18	46	11	11
OTU_157	k__Bacteria	p__Firmicutes	c__Clostridia	o__Clostridiales	f__Lachnospiraceae	g__Acetatifactor	Others	4	6	9	0	0	0	1	0	0	0	0	14	2	8	75	11	0	0	0	0	0	0	1	0	6	0	0	10	3	0	0	0	0	10	3	16	2	0	0	5
OTU_158	k__Bacteria	p__Firmicutes	c__Clostridia	o__Clostridiales	Others	Others	Others	0	0	0	0	0	0	2	0	0	0	0	0	0	0	2	0	19	0	0	0	0	1	2	10	0	0	0	13	0	0	0	0	4	0	0	0	0	13	0	6
OTU_159	k__Bacteria	p__Firmicutes	c__Clostridia	o__Clostridiales	f__Christensenellaceae	g__	s__	0	2	49	4	22	8	9	4	8	25	51	59	51	6	36	31	16	6	63	0	13	22	23	7	0	41	5	54	45	0	7	5	0	8	38	11	19	28	0	71
OTU_160	k__Bacteria	p__Firmicutes	c__Clostridia	o__Clostridiales	f__Lachnospiraceae	Others	Others	4	2	7	4	2	9	25	8	1	13	1	3	12	14	10	0	17	0	0	0	0	4	2	14	19	2	1	5	3	3	0	10	0	25	33	0	0	10	2	1
OTU_161	k__Bacteria	p__Firmicutes	c__Clostridia	o__Clostridiales	f__Lachnospiraceae	g__unidentified_Lachnospiraceae	s__Lachnospiraceae_bacterium_COE1	15	3	2	5	21	18	20	11	1	3	4	0	254	27	114	193	4	49	4	22	3	0	20	81	0	8	11	7	6	23	52	29	136	61	14	24	36	15	150	14
OTU_162	k__Bacteria	p__Actinobacteria	c__Coriobacteriia	o__Coriobacteriales	f__Atopobiaceae	Others	Others	5	2	4	0	58	24	1	41	6	102	392	173	1	1	2	8	0	3	51	155	1	0	84	0	4	12	28	8	3	11	17	7	202	49	4	4	73	27	419	3
OTU_163	k__Bacteria	p__Firmicutes	c__Clostridia	o__Clostridiales	f__Ruminococcaceae	Others	Others	0	3	53	0	10	2	44	7	1	14	9	30	18	15	11	5	9	90	9	5	5	0	1	54	61	15	5	3	49	2	19	11	35	23	15	5	8	12	12	2
OTU_164	k__Bacteria	p__Bacteroidetes	c__Bacteroidia	o__Bacteroidales	f__Rikenellaceae	g__Alistipes	s__	3	0	0	0	0	0	0	0	0	0	0	0	0	0	0	0	0	0	1	0	0	1	3	0	0	0	0	4	0	0	0	0	0	0	1	2	0	0	0	0
OTU_165	k__Bacteria	p__Firmicutes	c__Clostridia	o__Clostridiales	f__Ruminococcaceae	g__unidentified_Ruminococcaceae	s__Ruminococcus_flavefaciens	0	0	0	0	0	0	0	0	0	21	0	0	1	0	3	564	58	0	0	0	0	18	0	0	155	0	0	118	8	0	0	1	191	0	3	56	0	0	0	79
OTU_166	k__Bacteria	p__Bacteroidetes	c__Bacteroidia	o__Bacteroidales	f__Muribaculaceae	g__	s__	45	6	12	6	0	0	149	0	0	7	1	0	0	1	18	7	22	0	8	0	25	5	7	93	237	0	0	1	14	0	0	0	20	7	166	8	1	0	4	8
OTU_167	k__Bacteria	p__Firmicutes	c__Clostridia	o__Clostridiales	f__Ruminococcaceae	g__Ruminiclostridium	s__[Clostridium]_leptum	28	0	11	18	8	2	28	11	0	1	0	12	18	1	59	11	6	5	4	3	0	0	9	20	57	2	12	4	37	9	2	4	0	6	31	342	15	12	15	9
OTU_168	k__Bacteria	p__Firmicutes	c__Clostridia	o__Clostridiales	f__Lachnospiraceae	Others	Others	2	2	0	13	4	6	2	1	11	16	10	74	15	4	52	37	5	2	12	3	18	9	12	2	0	7	1	16	25	1	8	69	0	11	17	54	4	20	3	72
OTU_169	k__Bacteria	p__Firmicutes	c__Clostridia	o__Clostridiales	f__Lachnospiraceae	Others	Others	161	399	145	154	66	49	10	6	6	40	25	107	14	152	35	2	176	12	6	4	6	22	64	183	37	9	61	276	235	2	5	21	4	174	18	30	9	17	15	0
OTU_171	k__Bacteria	p__Firmicutes	c__Clostridia	o__Clostridiales	f__Ruminococcaceae	g__unidentified_Ruminococcaceae	Others	0	0	0	0	0	0	0	0	0	0	0	0	0	0	2	0	7	0	0	0	0	3	0	0	0	0	0	0	0	0	0	0	0	0	0	0	0	0	0	0
OTU_172	k__Bacteria	p__Firmicutes	c__Clostridia	o__Clostridiales	f__Lachnospiraceae	Others	Others	13	2	3	4	0	0	4	0	0	0	4	169	84	0	0	91	0	0	2	0	0	0	0	2	12	5	3	16	3	84	3	2	0	2	3	0	0	0	0	1
OTU_173	k__Bacteria	p__Firmicutes	c__Clostridia	o__Clostridiales	f__Ruminococcaceae	Others	Others	12	8	0	12	0	0	128	0	0	0	0	3	0	0	1	15	6	0	0	61	0	214	326	3	2	1	0	3	1	0	0	0	0	0	9	0	0	25	144	2
OTU_174	k__Bacteria	p__Firmicutes	c__Clostridia	o__Clostridiales	f__Ruminococcaceae	g__Ruminiclostridium	s__	16	2	19	3	0	2	4	10	0	3	0	1	60	1	12	24	8	4	9	4	1	2	5	7	6	0	3	4	23	0	5	1	4	10	16	163	15	110	8	0
OTU_175	k__Bacteria	p__Firmicutes	c__Clostridia	o__Clostridiales	f__Ruminococcaceae	g__Ruminiclostridium	s__	77	5	3	15	4	0	13	13	0	2	10	0	86	3	42	60	4	16	2	14	4	1	5	6	1	3	6	4	5	0	4	5	23	19	8	23	35	0	21	1
OTU_176	k__Bacteria	p__Firmicutes	c__Clostridia	o__Clostridiales	f__Lachnospiraceae	Others	Others	0	0	2	0	0	0	55	0	47	1	3	0	0	7	0	0	0	0	0	0	0	138	0	11	0	0	0	0	64	0	3	1	0	0	61	17	7	4	0	6
OTU_177	k__Bacteria	p__Firmicutes	c__Clostridia	o__Clostridiales	f__Ruminococcaceae	g__unidentified_Ruminococcaceae	Others	0	0	0	0	0	0	0	0	0	0	0	0	1	0	0	0	0	0	0	0	0	0	0	0	0	0	0	1	0	0	0	0	0	1	0	0	0	0	0	0
OTU_178	k__Bacteria	p__Firmicutes	c__Clostridia	o__Clostridiales	f__Lachnospiraceae	Others	Others	24	0	3	25	2	0	15	8	0	0	0	2	84	19	1	49	11	2	3	4	2	3	0	59	0	0	6	40	154	37	14	4	104	39	23	20	0	6	4	157
OTU_179	k__Bacteria	p__Firmicutes	c__Clostridia	o__Clostridiales	f__Peptostreptococcaceae	g__Romboutsia	s__	0	0	1	6	3	0	0	305	1	0	0	4	1	0	0	1	96	1	0	0	0	1	2	2	2	0	0	4	7	0	0	0	3	0	0	0	1	2	0	1
OTU_180	k__Bacteria	p__Firmicutes	c__Clostridia	o__Clostridiales	f__Lachnospiraceae	Others	Others	31	8	5	4	5	4	45	10	0	3	24	67	24	25	60	27	164	0	11	32	12	5	15	81	5	5	0	13	11	7	1	42	41	16	16	0	2	11	32	40
OTU_181	k__Bacteria	p__Tenericutes	c__Mollicutes	o__	f__	g__	s__	1	0	0	0	0	0	1	15	2	0	0	0	0	0	0	337	0	0	0	0	0	0	2	0	4	29	5	304	139	0	0	0	0	0	0	7	0	0	0	36
OTU_182	k__Bacteria	p__Firmicutes	c__Clostridia	o__Clostridiales	Others	Others	Others	43	3	11	13	28	29	45	43	26	19	2	6	102	209	21	88	26	30	248	9	11	62	59	111	71	20	5	15	108	23	27	17	16	12	43	5	4	34	17	33
OTU_183	k__Bacteria	p__Bacteroidetes	c__Bacteroidia	o__Bacteroidales	f__Prevotellaceae	g__unidentified_Prevotellaceae	s__Prevotella_copri	3	307	0	8	1	2	9	38	0	0	0	0	10	2	0	0	0	0	0	1	3	1	3	0	0	3	0	0	1307	0	0	3	0	0	2	3	2	0	1	2
OTU_184	k__Bacteria	p__Firmicutes	c__Clostridia	o__Clostridiales	f__Ruminococcaceae	g__unidentified_Ruminococcaceae	Others	0	0	0	0	0	0	93	0	0	0	13	0	0	0	2	0	2	0	11	0	0	0	0	0	0	0	0	1	0	0	0	0	0	0	444	0	28	210	0	1
OTU_185	k__Bacteria	p__Firmicutes	c__Clostridia	o__Clostridiales	f__Ruminococcaceae	g__Oscillibacter	Others	38	9	2	18	7	0	59	23	0	1	4	3	42	2	75	35	7	5	2	6	2	4	3	23	6	4	4	5	13	2	1	12	11	23	16	89	30	12	34	8
OTU_186	k__Bacteria	p__Bacteroidetes	c__Bacteroidia	o__Bacteroidales	f__Muribaculaceae	g__	s__	168	10	15	12	3	3	15	43	1	0	21	14	4	0	33	16	5	7	72	11	44	4	62	2	57	5	1	17	26	0	0	18	23	2	64	42	36	5	2	7
OTU_187	k__Bacteria	p__Firmicutes	c__Clostridia	o__Clostridiales	f__unidentified_Clostridiales	g__unidentified_Clostridiales	Others	0	2	5	1	9	7	22	2	7	6	4	6	30	10	19	3	8	4	5	12	8	12	23	6	4	14	13	17	36	83	17	33	1	5	5	49	37	29	13	49
OTU_188	k__Bacteria	p__Firmicutes	c__Clostridia	o__Clostridiales	f__unidentified_Clostridiales	g__Anaerovorax	s__	0	2	3	0	7	1	14	0	0	8	3	16	0	0	14	2	19	0	45	0	0	2	13	3	0	0	0	32	10	0	0	0	16	0	46	9	0	19	0	15
OTU_189	k__Bacteria	p__Firmicutes	c__Clostridia	o__Clostridiales	f__Lachnospiraceae	Others	Others	4	5	6	2	3	5	1	0	0	3	0	4	0	2	264	24	3	0	2	12	4	1	10	3	0	1	6	0	3	1	3	1110	1620	6	12	3	5	2	12	9
OTU_190	k__Bacteria	p__Bacteroidetes	c__Bacteroidia	o__Bacteroidales	f__Rikenellaceae	g__Alistipes	s__	41	5	8	4	4	0	10	7	0	3	4	17	2	0	13	1	0	3	83	6	5	0	23	1	5	0	6	5	16	0	0	6	9	3	34	12	8	7	17	7
OTU_191	k__Bacteria	p__Firmicutes	c__Clostridia	o__Clostridiales	f__Lachnospiraceae	Others	Others	0	0	0	0	0	0	84	84	0	0	0	1	3	1	0	0	0	0	0	0	2	5	0	13	0	0	0	2	4	0	0	0	0	0	10	0	0	0	0	0
OTU_192	k__Bacteria	p__Firmicutes	c__Clostridia	o__Clostridiales	f__Peptococcaceae	g__	s__	64	11	33	29	25	34	5	26	4	2	59	28	30	41	34	36	16	4	39	12	54	25	16	7	16	22	1	95	34	2	17	46	53	28	21	0	4	22	32	48
OTU_193	k__Bacteria	p__Firmicutes	c__Clostridia	o__Clostridiales	f__Ruminococcaceae	Others	Others	2	7	15	0	2	0	1	1	0	0	0	7	13	3	8	20	0	0	2	2	0	0	2	2	12	1	0	0	7	2	0	0	9	3	12	9	3	0	3	4
OTU_194	k__Bacteria	p__Firmicutes	c__Bacilli	o__Lactobacillales	f__Lactobacillaceae	g__Lactobacillus	s__Lactobacillus_intestinalis	0	3	34	0	3	0	0	1	7	0	0	0	0	0	0	0	40	0	0	1	2	0	4	0	2	3	1	0	0	0	0	0	0	0	2	0	3	8	0	752
OTU_195	k__Bacteria	p__Firmicutes	c__Clostridia	o__Clostridiales	f__unidentified_Clostridiales	g__unidentified_Clostridiales	Others	0	0	3	2	1	0	5	56	0	1	0	0	0	0	0	0	4	0	0	0	0	0	0	0	0	0	0	0	0	0	0	2	9	0	0	0	0	0	0	9
OTU_196	k__Archaea	p__Euryarchaeota	c__Methanobacteria	o__Methanobacteriales	f__Methanobacteriaceae	g__Methanobacterium	s__Methanobacterium_beijingense	0	0	0	0	0	1682	0	4	3	1	0	0	0	0	0	0	0	0	0	0	0	0	0	0	0	0	0	0	0	0	0	1	0	3	0	0	2	0	0	0
OTU_197	k__Bacteria	p__Bacteroidetes	c__Bacteroidia	o__Bacteroidales	f__Muribaculaceae	g__	s__	14	0	2	0	0	2	3	8	0	0	0	0	2	0	26	4	6	0	15	7	12	2	40	0	60	1	0	14	14	0	0	0	26	3	28	9	3	5	7	0
OTU_198	k__Bacteria	p__Firmicutes	c__Erysipelotrichia	o__Erysipelotrichales	f__Erysipelotrichaceae	g__Faecalibaculum	Others	5	6	27	32	30	33	6	29	264	1185	367	244	14	29	0	79	514	13	329	1279	21	163	214	19	0	143	36	23	3	4304	255	1611	40	61	14	0	1548	2651	750	2
OTU_199	k__Bacteria	p__Firmicutes	c__Clostridia	o__Clostridiales	f__Lachnospiraceae	g__unidentified_Lachnospiraceae	s__Lachnospiraceae_bacterium_A2	2	3	0	3	3	1	2	84	1	5	136	5	2	2	218	1249	14	8	0	0	44	2	0	12	0	0	0	12	240	4	0	134	3	6	1	0	68	0	2	584
OTU_200	k__Bacteria	p__Firmicutes	c__Erysipelotrichia	o__Erysipelotrichales	f__Erysipelotrichaceae	Others	Others	0	2	0	0	0	0	0	0	1	0	34	20	62	0	25	69	0	0	6	0	1	3	17	0	14	0	2	40	35	0	3	17	3	0	47	0	0	0	0	703
OTU_201	k__Bacteria	p__Firmicutes	c__Clostridia	o__Clostridiales	f__Ruminococcaceae	g__Anaerotruncus	s__	144	55	11	60	7	3	3	6	1	2	6	1	34	8	26	46	5	0	5	12	6	0	38	1	1	6	1	78	5	7	4	17	4	16	0	8	13	2	22	56
OTU_202	k__Bacteria	p__Firmicutes	c__Erysipelotrichia	o__Erysipelotrichales	f__Erysipelotrichaceae	g__Candidatus_Stoquefichus	s__	0	0	0	2	0	0	0	0	0	2	63	2	0	0	0	13	0	0	0	0	5	0	5	0	2	0	0	22	4	0	0	68	6	0	0	0	0	0	0	874
OTU_203	k__Bacteria	p__Firmicutes	c__Clostridia	o__Clostridiales	f__Ruminococcaceae	Others	Others	0	0	0	0	3	1	0	0	9	1	4	0	68	63	6	3	0	11	8	11	0	3	2	1	88	23	7	7	58	0	0	0	1	4	1	0	0	0	34	578
OTU_204	k__Bacteria	p__Firmicutes	c__Clostridia	o__Clostridiales	f__Lachnospiraceae	g__	s__	14	1	9	30	0	2	44	0	0	0	13	0	2	1	34	0	17	0	0	0	0	2	2	1	5	1	2	13	2	0	0	11	184	8	14	0	0	0	0	4
OTU_205	k__Bacteria	p__Firmicutes	c__Bacilli	o__Bacillales	f__Staphylococcaceae	g__Nosocomiicoccus	s__	0	0	0	0	0	0	0	3	0	0	0	0	0	0	0	0	0	0	0	0	0	0	0	0	0	0	0	0	0	0	0	0	0	0	0	0	0	0	0	0
OTU_206	k__Bacteria	p__Tenericutes	c__Mollicutes	o__	f__	g__	s__	0	0	8	0	0	0	0	0	0	1	0	1	0	0	1	16	15	0	0	0	1	0	0	0	1105	0	0	1	37	0	0	0	2	0	0	2	0	0	0	2
OTU_207	k__Bacteria	p__Bacteroidetes	c__Bacteroidia	o__Bacteroidales	f__Prevotellaceae	g__	s__	0	1	0	0	2	0	3	40	0	1	0	3	45	2	18	3	0	29	28	1	0	0	8	15	39	20	7	4	5	1	6	24	32	3	16	13	12	1	21	13
OTU_208	k__Bacteria	p__Firmicutes	c__Clostridia	o__Clostridiales	f__Lachnospiraceae	Others	Others	0	0	2	0	2	0	4	0	0	0	0	0	0	0	0	118	3	0	0	0	0	0	0	0	9	2	0	0	3	0	0	0	0	0	84	0	0	0	1	0
OTU_209	k__Bacteria	p__Tenericutes	c__Mollicutes	o__	f__	g__	s__	13	2	6	3	3	2	1	2	3	1	15	0	0	7	4	24	2	1	43	5	0	5	18	11	6	6	3	1	27	8	0	0	10	1	4	0	1	15	13	88
OTU_210	k__Bacteria	p__Firmicutes	c__Clostridia	o__Clostridiales	f__Peptococcaceae	g__	s__	22	19	16	21	11	4	19	11	1	4	1	6	53	12	87	27	11	5	4	1	2	1	2	20	9	7	0	8	18	5	5	30	27	17	58	18	23	13	21	16
OTU_211	k__Bacteria	p__Firmicutes	c__Clostridia	o__Clostridiales	f__Ruminococcaceae	Others	Others	0	0	32	0	0	1	11	0	4	0	0	0	1	247	0	0	0	5	1	0	0	23	0	13	0	0	0	0	0	0	0	0	3	0	56	1	0	20	0	0
OTU_212	k__Bacteria	p__Bacteroidetes	c__Bacteroidia	o__Bacteroidales	f__Rikenellaceae	g__	s__	0	0	2	0	0	0	0	210	0	0	0	0	0	0	0	0	0	0	0	0	0	0	0	0	0	0	0	0	0	0	0	0	0	0	0	0	2	0	0	0
OTU_213	k__Bacteria	p__Firmicutes	c__Clostridia	o__Clostridiales	f__Lachnospiraceae	Others	Others	4	16	3	13	0	0	6	0	0	0	0	0	5	3	0	22	1	0	0	0	0	1	0	7	0	9	2	7	7	0	1	0	1	5	4	0	0	0	0	0
OTU_214	k__Bacteria	p__Firmicutes	c__Clostridia	o__Clostridiales	f__Lachnospiraceae	Others	Others	19	26	4	13	4	1	5	0	4	7	21	10	42	8	6	33	3	1	0	13	1	0	11	13	6	0	2	20	0	44	0	33	2	0	16	10	11	1	17	3
OTU_215	k__Bacteria	p__Firmicutes	c__Clostridia	o__Clostridiales	Others	Others	Others	0	7	2	4	6	6	0	1	0	2	35	23	16	2	1	26	8	0	0	5	5	8	0	2	22	1	0	22	7	44	18	19	2	3	6	11	6	4	15	1
OTU_216	k__Bacteria	p__Firmicutes	c__Erysipelotrichia	o__Erysipelotrichales	f__Erysipelotrichaceae	Others	Others	2	16	0	0	0	0	0	3	2	0	8	2	0	66	0	0	0	1	0	0	31	0	67	0	2	134	0	22	0	10	1	0	0	0	190	0	45	0	0	0
OTU_217	k__Bacteria	p__Bacteroidetes	c__Bacteroidia	o__Bacteroidales	f__Muribaculaceae	g__	s__	0	0	0	0	0	0	0	2	0	4	0	0	0	0	1	2	75	1	58	27	5	1	0	63	0	2	0	0	0	0	0	2	9	0	0	0	0	4	30	0
OTU_218	k__Bacteria	p__Firmicutes	c__Bacilli	o__Bacillales	f__Staphylococcaceae	g__Jeotgalicoccus	s__	0	2	0	0	9	3	0	1	5	4	0	0	4	1	1	1	5	0	7	0	14	50	2	0	97	2	0	0	1	0	3	1	0	0	0	0	0	0	3	0
OTU_219	k__Bacteria	p__Firmicutes	c__Clostridia	o__Clostridiales	f__Ruminococcaceae	g__Subdoligranulum	s__	0	0	0	0	4	1	0	871	3	0	0	0	0	2	0	0	0	0	0	0	0	0	8	0	0	0	0	0	7	0	0	0	0	1	0	0	2	0	0	0
OTU_220	k__Bacteria	p__Firmicutes	c__Clostridia	o__Clostridiales	f__Lachnospiraceae	Others	Others	0	0	0	0	0	0	20	0	0	0	0	0	0	0	246	0	13	0	0	0	0	1	0	0	0	0	0	1	0	0	0	0	58	0	0	2	1	223	7	0
OTU_221	k__Bacteria	p__Firmicutes	c__Clostridia	o__Clostridiales	f__Lachnospiraceae	Others	Others	0	0	0	2	0	0	0	0	0	0	0	0	0	0	2	0	4	0	0	0	0	0	3	0	0	0	0	0	0	0	0	7	0	0	1	10	0	0	4	0
OTU_222	k__Bacteria	p__Tenericutes	c__Mollicutes	o__	f__	g__	s__	23	6	0	29	8	9	6	1	3	4	3	2	28	7	46	62	2	12	21	3	6	16	9	9	3	6	4	35	64	0	2	0	1	6	14	20	0	21	3	108
OTU_223	k__Bacteria	p__Firmicutes	c__Clostridia	o__Clostridiales	f__Lachnospiraceae	Others	Others	0	0	0	0	146	68	3	13	6	7	2	4	33	33	57	129	4	35	2	7	28	26	29	119	19	12	3	9	33	49	151	74	15	13	0	10	10	41	82	74
OTU_224	k__Bacteria	p__Actinobacteria	c__Coriobacteriia	o__Coriobacteriales	f__Eggerthellaceae	g__Enterorhabdus	s__	0	0	0	5	3	3	0	1	0	7	3	16	6	4	4	0	43	1	9	3	9	13	15	0	0	1	0	7	3	10	1	13	10	2	1	5	7	7	2	2
OTU_225	k__Bacteria	p__Firmicutes	c__Clostridia	o__Clostridiales	f__Ruminococcaceae	Others	Others	0	0	0	0	0	0	0	0	0	2	0	0	1	0	0	0	0	0	0	0	0	3	2	0	5	0	0	23	5	0	0	0	0	0	0	0	0	0	3	0
OTU_226	k__Bacteria	p__Firmicutes	c__Bacilli	o__Lactobacillales	f__Streptococcaceae	g__Streptococcus	s__Streptococcus_salivarius_subsp_thermophilus	1	3	3	0	0	0	0	65	0	5	1	0	1	0	0	4	2	0	0	0	0	0	0	0	0	3	1812	7	0	0	0	0	1	0	0	0	0	0	3	5
OTU_227	k__Bacteria	p__Firmicutes	c__Clostridia	o__Clostridiales	f__Lachnospiraceae	Others	Others	4	0	0	3	0	0	2	0	0	0	0	2	33	1	6	153	0	3	1	4	0	0	0	1	615	19	4	0	4	0	0	0	2	0	41	4	1	1	12	0
OTU_228	k__Bacteria	p__Tenericutes	c__Mollicutes	o__	f__	g__	s__	0	0	3	0	0	0	6	0	0	0	0	0	0	0	0	100	2	0	0	1	0	29	24	0	22	5	4	4	70	0	0	0	0	0	28	16	0	6	0	22
OTU_229	k__Bacteria	p__Tenericutes	c__Mollicutes	o__	f__	g__	s__	0	0	0	0	0	0	0	0	0	0	1	0	0	7	0	0	0	19	0	0	0	10	0	86	0	0	0	0	173	0	0	0	0	0	50	47	0	0	0	0
OTU_230	k__Bacteria	p__Firmicutes	c__Clostridia	o__Clostridiales	f__Lachnospiraceae	Others	Others	19	4	8	25	2	6	20	0	0	0	11	3	26	1	14	21	8	0	5	16	1	9	5	3	2	2	3	11	15	3	6	2	15	12	115	3	35	5	11	22
OTU_231	k__Bacteria	p__Firmicutes	c__Clostridia	o__Clostridiales	f__Ruminococcaceae	g__Butyricicoccus	s__	0	0	0	0	0	2	0	7	0	0	1	48	26	20	7	1	2	0	0	0	0	0	28	23	7	1	5	12	3	37	5	3	2	12	0	5	11	0	1	0
OTU_232	k__Bacteria	p__Firmicutes	c__Clostridia	o__Clostridiales	f__Lachnospiraceae	Others	Others	32	12	5	73	1	0	12	18	3	0	49	61	34	34	7	23	8	0	1	35	5	4	12	18	11	8	1	7	9	49	33	92	38	51	9	4	37	2	55	21
OTU_233	k__Bacteria	p__Firmicutes	c__Erysipelotrichia	o__Erysipelotrichales	f__Erysipelotrichaceae	Others	Others	8	4	7	8	12	8	16	17	1	6	86	0	36	15	0	22	2	12	4	0	5	16	7	27	0	1	1	15	27	0	3	3	9	21	30	2	0	4	0	3
OTU_234	k__Bacteria	p__Bacteroidetes	c__Bacteroidia	o__Bacteroidales	f__Rikenellaceae	g__Alistipes	s__	10	1	0	0	1	4	0	159	0	0	0	8	1	3	11	0	4	2	39	6	3	5	2	5	0	0	0	0	0	1	0	8	0	0	14	0	0	0	2	3
OTU_235	k__Bacteria	p__Actinobacteria	c__Coriobacteriia	o__Coriobacteriales	f__Eggerthellaceae	g__Enterorhabdus	s__	6	6	7	6	7	13	3	11	5	26	4	8	14	19	9	2	35	5	26	12	28	31	4	6	0	9	0	5	6	11	16	30	8	1	10	9	43	6	17	21
OTU_236	k__Bacteria	p__Firmicutes	c__Clostridia	o__Clostridiales	f__Ruminococcaceae	g__unidentified_Ruminococcaceae	s__Clostridiales_bacterium_canine_oral_taxon_123	0	3	4	0	7	8	5	3	3	4	0	0	21	48	6	15	21	7	56	1	5	9	48	15	18	3	1	3	22	0	0	2	25	0	9	0	27	16	4	3
OTU_237	k__Bacteria	p__Firmicutes	c__Erysipelotrichia	o__Erysipelotrichales	f__Erysipelotrichaceae	Others	Others	15	3	1	5	0	0	0	0	0	0	33	15	6	36	102	11	0	0	47	0	5	6	0	0	0	42	5	37	111	4	1	7	0	0	4	9	1	0	0	16
OTU_238	k__Bacteria	p__Firmicutes	c__Clostridia	o__Clostridiales	f__Lachnospiraceae	Others	Others	0	0	0	0	0	1	0	4	0	3	0	0	0	1	0	0	2	0	0	0	0	0	0	1	0	0	0	0	0	0	0	0	0	0	0	0	0	0	0	0
OTU_239	k__Bacteria	p__Bacteroidetes	c__Bacteroidia	o__Bacteroidales	f__Muribaculaceae	g__	s__	22	3	18	4	16	10	6	17	0	0	0	0	0	0	0	0	6	6	0	0	4	4	0	2	0	1	0	0	0	1	0	0	0	49	0	0	0	12	9	0
OTU_240	k__Bacteria	p__Firmicutes	c__Clostridia	o__Clostridiales	f__Ruminococcaceae	g__Oscillospira	s__	8	15	0	1	2	3	1	0	0	1	0	0	8	0	12	8	3	0	4	0	0	0	0	2	6	0	2	2	0	0	0	3	0	10	15	15	0	0	0	0
OTU_242	k__Bacteria	p__Firmicutes	c__Clostridia	o__Clostridiales	f__Ruminococcaceae	g__unidentified_Ruminococcaceae	s__Ruminiclostridium_sp_KB18	4	0	0	1	0	0	1	3	0	0	0	3	49	6	0	6	0	0	2	2	0	0	1	0	2	3	2	1	6	14	0	2	0	3	11	30	0	0	1	0
OTU_243	k__Bacteria	p__Firmicutes	c__Clostridia	o__Clostridiales	f__Ruminococcaceae	g__Faecalibacterium	s__	0	38	7	3	3	3	3	89	0	0	2	3	4	0	2	2	0	1	0	0	0	0	25	1	0	0	0	0	254	0	3	0	18	0	0	0	1	0	0	2
OTU_244	k__Bacteria	p__Firmicutes	c__Clostridia	o__Clostridiales	f__Lachnospiraceae	Others	Others	59	35	5	78	15	4	29	19	3	4	37	34	103	14	264	113	230	10	35	64	15	12	106	9	16	84	18	213	193	41	2	315	37	49	63	87	129	8	75	87
OTU_245	k__Bacteria	p__Firmicutes	c__Clostridia	o__Clostridiales	Others	Others	Others	0	0	1	2	4	8	7	4	1	9	3	8	13	6	8	13	10	3	3	7	3	4	18	8	1	8	4	6	6	19	7	53	3	6	10	14	13	18	1	13
OTU_246	k__Bacteria	p__Firmicutes	c__Clostridia	o__Clostridiales	f__Ruminococcaceae	g__Oscillibacter	s__	27	10	8	1	11	0	36	3	0	0	0	0	31	5	49	28	5	3	7	4	1	4	1	4	16	5	1	2	11	1	1	10	6	26	24	7	4	0	9	2
OTU_248	k__Bacteria	p__Bacteroidetes	c__Bacteroidia	o__Bacteroidales	f__Tannerellaceae	g__Parabacteroides	s__Parabacteroides_goldsteinii	0	0	4	0	0	0	0	33	0	0	3	1	1	1	0	0	0	0	27	0	0	0	23	0	0	0	0	0	0	0	0	33	23	2	0	0	0	0	1	0
OTU_249	k__Bacteria	p__Firmicutes	c__Clostridia	o__Clostridiales	f__Lachnospiraceae	Others	Others	0	0	0	0	0	0	9	3	0	2	0	0	0	86	0	0	5	0	0	0	0	0	0	188	0	0	0	1	2	0	0	1	0	0	0	6	4	88	0	0
OTU_250	k__Bacteria	p__Firmicutes	c__Clostridia	o__Clostridiales	f__Lachnospiraceae	Others	Others	9	1	3	5	3	0	106	5	0	2	17	1	98	14	6	283	5	1	1	1	0	49	28	2	55	19	3	21	24	43	37	64	22	51	4	1	0	5	5	80
OTU_251	k__Bacteria	p__Firmicutes	c__Clostridia	o__Clostridiales	f__Lachnospiraceae	g__Blautia	s__Lachnospiraceae_bacterium_615	4	63	0	9	0	0	0	8	0	2	35	0	13	2	15	18	46	1	0	0	5	1	4	0	6	0	0	11	16	4	0	1	8	3	2	0	2	2	2	2
OTU_252	k__Bacteria	p__Firmicutes	c__Clostridia	o__Clostridiales	f__Ruminococcaceae	Others	Others	0	1	0	0	0	0	0	0	0	5	0	0	4	1	0	0	0	0	0	2	0	1	3	0	0	0	0	0	4	0	0	4	0	3	0	0	0	0	0	0
OTU_253	k__Bacteria	p__Firmicutes	c__Clostridia	o__Clostridiales	f__Ruminococcaceae	g__unidentified_Ruminococcaceae	Others	0	1	1	0	3	0	33	1	0	6	2	1	0	0	1	141	2	0	95	0	0	3	39	1	69	9	0	5	27	1	6	1	0	0	10	30	0	0	0	10
OTU_254	k__Bacteria	p__Tenericutes	c__Mollicutes	o__	f__	g__	s__	0	0	3	0	11	3	0	2	4	2	0	0	0	0	7	24	12	4	0	0	0	8	6	0	4	15	5	16	64	0	0	0	6	1	3	4	0	17	0	0
OTU_255	k__Bacteria	p__Firmicutes	c__Clostridia	o__Clostridiales	f__Lachnospiraceae	Others	Others	13	11	1	24	0	0	1	2	5	9	13	0	18	20	19	20	7	2	0	8	8	3	4	10	0	5	4	4	2	2	10	44	0	5	15	2	0	11	1	12
OTU_256	k__Bacteria	p__Proteobacteria	c__Deltaproteobacteria	o__Desulfovibrionales	f__Desulfovibrionaceae	g__Bilophila	s__	11	0	1	5	1	2	3	5	0	0	5	2	124	0	1	18	2	0	17	8	0	0	3	8	6	5	1	2	7	0	7	3	8	6	4	69	16	0	3	11
OTU_257	k__Bacteria	p__Firmicutes	c__Clostridia	o__Clostridiales	f__Lachnospiraceae	Others	Others	1	0	0	0	0	0	11	0	0	0	3	0	0	0	0	0	0	0	0	0	0	1	0	0	0	0	0	0	0	0	0	0	0	2	2	0	0	0	0	0
OTU_258	k__Bacteria	p__Bacteroidetes	c__Bacteroidia	o__Bacteroidales	f__Bacteroidaceae	g__Bacteroides	s__Bacteroides_uniformis	0	3	1	0	0	0	2	2	0	2	0	0	0	0	0	0	3	0	0	0	1	0	3	0	10	2	0	0	44	0	0	0	12	0	1	0	0	0	0	4
OTU_259	k__Bacteria	p__Firmicutes	c__Clostridia	o__Clostridiales	f__Lachnospiraceae	Others	Others	1	0	0	0	0	0	2	0	0	0	0	0	6	0	27	0	0	0	0	0	0	0	0	11	1	0	7	1	0	45	0	1	2	0	29	0	0	2	7	0
OTU_260	k__Bacteria	p__Tenericutes	c__Mollicutes	o__	f__	g__	s__	18	3	18	4	0	0	3	0	3	3	5	0	8	11	0	5	6	0	11	0	0	12	11	15	15	3	20	44	65	1	0	0	0	0	27	9	0	12	0	248
OTU_261	k__Bacteria	p__Firmicutes	c__Clostridia	o__Clostridiales	f__Lachnospiraceae	g__unidentified_Lachnospiraceae	s__Clostridium_sp_Clone-47	0	0	0	0	0	0	1	0	0	0	4	10	0	0	0	31	0	1	0	0	0	0	2	0	2	0	0	0	0	0	0	1	7	0	12	0	0	0	6	0
OTU_262	k__Bacteria	p__Firmicutes	c__Clostridia	o__Clostridiales	f__Ruminococcaceae	Others	Others	0	0	3	0	8	2	4	7	1	12	4	0	4	32	18	22	0	0	8	5	6	3	16	5	44	0	0	2	27	0	0	1	5	0	3	0	7	6	6	57
OTU_263	k__Bacteria	p__Firmicutes	c__Clostridia	o__Clostridiales	f__Lachnospiraceae	g__Acetatifactor	s__	12	27	10	5	3	0	6	0	0	0	0	3	37	4	4	16	0	0	0	0	0	1	7	0	4	2	7	0	3	0	0	0	0	9	5	2	0	0	0	0
OTU_264	k__Bacteria	p__Firmicutes	c__Clostridia	o__Clostridiales	f__Ruminococcaceae	Others	Others	0	0	0	1	4	0	0	2	0	3	3	10	351	26	5	8	0	1	2	0	0	3	56	5	0	180	0	0	1	0	0	7	4	0	0	1	73	0	0	0
OTU_265	k__Bacteria	p__Firmicutes	c__Clostridia	o__Clostridiales	f__Lachnospiraceae	Others	Others	13	6	9	25	5	0	57	2	2	1	6	0	13	3	5	0	20	3	0	0	23	16	0	20	0	4	7	23	6	2	0	5	1	21	22	11	3	9	0	4
OTU_266	k__Bacteria	p__Firmicutes	c__Clostridia	o__Clostridiales	f__Lachnospiraceae	g__unidentified_Lachnospiraceae	s__Lachnospiraceae_bacterium_DW12	76	24	28	69	32	47	6	15	0	0	49	5	8	13	10	17	2	1	1	1	0	0	10	0	3	11	6	60	20	1	10	2	3	61	35	0	0	1	1	6
OTU_267	k__Bacteria	p__Bacteroidetes	c__Bacteroidia	o__Flavobacteriales	f__Flavobacteriaceae	g__Flavobacterium	s__Flavobacterium_indicum	1	21	0	0	2	3	0	4	6	0	0	0	0	1	0	0	0	0	1	0	0	0	1	3	1	0	0	1	4	0	3	6	1	0	4	0	0	0	2	0
OTU_268	k__Bacteria	p__Firmicutes	c__Clostridia	o__Clostridiales	f__Lachnospiraceae	Others	Others	0	0	0	0	0	0	0	5	0	0	2	3	0	0	66	8	0	0	0	0	0	0	37	3	0	6	5	9	0	6	0	18	40	0	257	7	0	0	0	0
OTU_269	k__Bacteria	p__Firmicutes	c__Clostridia	o__Clostridiales	f__Lachnospiraceae	g__Acetitomaculum	Others	0	0	0	0	0	0	13	0	1	0	0	0	2	0	13	0	0	0	0	0	0	0	0	130	0	2	1	6	8	0	0	0	1	0	20	10	0	0	0	0
OTU_270	k__Bacteria	p__Firmicutes	c__Clostridia	o__Clostridiales	f__Lachnospiraceae	Others	Others	9	16	5	14	0	1	48	10	0	7	11	42	29	2	58	49	9	1	2	5	4	14	16	7	0	2	2	30	12	13	4	23	17	12	15	30	32	7	8	37
OTU_271	k__Bacteria	p__Tenericutes	c__Mollicutes	o__	f__	g__	s__	2	0	0	0	0	0	2	0	2	0	1	1	0	49	0	52	1	4	0	0	1	7	7	7	0	17	2	15	109	0	0	2	0	0	12	3	0	2	2	206
OTU_272	k__Bacteria	p__Firmicutes	c__Clostridia	o__Clostridiales	f__Ruminococcaceae	Others	Others	13	0	1	2	5	2	1	5	0	0	1	2	10	9	13	7	5	0	4	0	4	4	6	0	6	2	2	11	15	3	5	10	16	2	12	5	5	7	7	9
OTU_273	k__Bacteria	p__Bacteroidetes	c__Bacteroidia	o__Bacteroidales	f__Prevotellaceae	g__Alloprevotella	s__	0	19	0	0	0	0	0	1	0	0	0	0	0	0	0	0	0	0	0	0	0	0	9	0	0	0	0	0	364	0	1	0	0	0	0	0	0	0	0	0
OTU_274	k__Bacteria	p__Firmicutes	c__Clostridia	o__Clostridiales	f__Ruminococcaceae	Others	Others	37	31	16	8	23	6	97	37	2	10	49	15	33	16	169	35	11	5	59	20	2	0	7	33	15	11	7	22	32	40	9	38	63	122	62	93	149	25	68	14
OTU_275	k__Bacteria	p__Actinobacteria	c__Coriobacteriia	o__Coriobacteriales	f__Eggerthellaceae	Others	Others	1	7	4	6	3	2	4	1	0	5	4	5	19	3	7	34	15	0	0	4	26	27	4	5	0	4	1	44	13	30	2	15	2	6	3	0	8	3	9	10
OTU_276	k__Bacteria	p__Firmicutes	c__Clostridia	o__Clostridiales	f__Lachnospiraceae	g__unidentified_Lachnospiraceae	s__Clostridiales_bacterium_CIEAF_020	2	0	0	0	4	9	38	0	2	27	0	0	0	32	0	0	18	0	0	2	0	1	7	94	0	1	5	0	4	0	496	1	0	7	2	0	5	116	2	0
OTU_277	k__Bacteria	p__Firmicutes	c__Clostridia	o__Clostridiales	f__Lachnospiraceae	Others	Others	4	2	0	2	0	0	4	3	0	3	0	4	15	3	25	9	12	2	1	1	1	2	2	6	2	3	1	11	12	6	5	9	4	3	22	0	3	6	9	14
OTU_278	k__Bacteria	p__Firmicutes	c__Clostridia	o__Clostridiales	f__Lachnospiraceae	g__unidentified_Lachnospiraceae	s__Clostridiales_bacterium_CIEAF_020	1	0	0	1	0	0	2	0	0	1	0	0	0	31	3	0	735	0	0	0	0	4	2	0	0	0	0	0	0	0	4	2	0	0	0	0	0	1	0	0
OTU_279	k__Bacteria	p__Bacteroidetes	c__Bacteroidia	o__Bacteroidales	f__Rikenellaceae	g__Millionella	s__Millionella_massiliensis	36	1	1	0	0	6	0	10	0	0	0	0	0	0	2	0	0	0	36	0	0	1	0	0	0	0	0	0	0	8	1	34	0	5	0	0	0	0	0	0
OTU_280	k__Bacteria	p__Tenericutes	c__Mollicutes	o__	f__	g__	s__	162	0	5	123	0	0	5	0	0	0	5	0	0	0	17	0	15	0	17	0	0	9	0	0	0	0	0	31	3	0	0	0	0	0	4	0	0	0	0	2
OTU_281	k__Bacteria	p__Bacteroidetes	c__Bacteroidia	o__Bacteroidales	f__Muribaculaceae	g__	s__	0	0	0	0	5	0	0	25	0	0	24	0	0	0	27	0	0	0	7	6	12	0	32	0	0	0	0	0	0	1	0	0	14	0	0	0	33	12	38	0
OTU_282	k__Bacteria	p__Bacteroidetes	c__Bacteroidia	o__Bacteroidales	f__Muribaculaceae	g__	s__	0	0	0	0	0	0	0	5	0	0	2	0	5	0	1	0	2	2	0	0	0	0	27	7	0	0	5	7	2	0	0	0	12	0	0	1	0	1	0	0
OTU_283	k__Bacteria	p__Firmicutes	c__Clostridia	o__Clostridiales	f__Peptococcaceae	g__Peptococcus	s__	4	1	3	4	0	0	10	0	0	3	0	0	12	3	10	2	0	0	2	2	3	3	6	6	0	0	3	5	9	6	0	0	1	1	1	44	1	13	6	9
OTU_284	k__Bacteria	p__Tenericutes	c__Mollicutes	Others	Others	Others	Others	11	0	0	9	26	17	0	25	10	9	0	0	0	1	44	0	10	6	39	1	0	4	0	0	0	1	0	0	0	0	0	6	0	10	0	1	0	13	2	0
OTU_285	k__Bacteria	p__Firmicutes	c__Clostridia	o__Clostridiales	f__Lachnospiraceae	Others	Others	2	3	0	0	1	1	5	4	4	3	2	2	12	0	134	214	0	3	0	0	5	8	11	0	53	0	4	0	6	45	0	124	0	7	0	64	0	0	0	374
OTU_286	k__Bacteria	p__Firmicutes	c__Clostridia	o__Clostridiales	f__Ruminococcaceae	g__Anaerotruncus	s__	10	5	3	0	3	2	6	3	0	0	2	0	19	0	6	10	7	2	0	15	0	0	0	6	4	1	0	16	15	24	2	13	15	15	13	38	19	3	3	2
OTU_287	k__Bacteria	p__Firmicutes	c__Clostridia	o__Clostridiales	f__Lachnospiraceae	Others	Others	0	0	1	1	0	0	84	0	0	0	0	2	0	0	0	1	8	0	0	0	0	0	0	0	0	0	0	0	0	0	0	0	0	0	0	1	0	0	0	0
OTU_288	k__Bacteria	p__Firmicutes	c__Clostridia	o__Clostridiales	f__Lachnospiraceae	Others	Others	5	0	6	1	8	0	5	8	4	26	59	14	137	2	167	0	3	8	0	73	4	0	2	13	0	189	4	48	37	0	0	270	0	0	0	0	0	169	555	0
OTU_289	k__Bacteria	p__Firmicutes	c__Clostridia	o__Clostridiales	f__Lachnospiraceae	g__Blautia	s__Blautia_coccoides	2	18	10	10	1	2	4	1	0	0	3	4	18	0	12	4	0	0	0	0	0	0	1	0	13	0	1	7	10	8	11	6	4	12	2	17	23	0	8	0
OTU_290	k__Bacteria	p__Firmicutes	c__Clostridia	o__Clostridiales	f__Lachnospiraceae	Others	Others	25	0	0	16	0	1	0	0	0	0	2	0	0	0	19	0	1	2	0	0	14	0	0	12	0	3	0	0	69	1	0	0	4	2	97	34	0	0	3	0
OTU_291	k__Bacteria	p__Firmicutes	c__Clostridia	o__Clostridiales	f__Ruminococcaceae	g__Oscillibacter	s__	26	1	4	2	3	0	4	7	0	2	2	3	21	5	31	8	3	2	6	3	0	0	4	1	6	2	1	5	7	4	6	21	7	4	2	19	13	2	23	0
OTU_292	k__Bacteria	p__Firmicutes	c__Clostridia	o__Clostridiales	f__Ruminococcaceae	g__	s__	2	2	4	2	5	0	0	4	0	60	0	1	4	22	2	0	0	0	5	0	0	17	0	0	0	0	0	0	144	0	0	3	129	0	2	5	0	0	0	0
OTU_293	k__Bacteria	p__Firmicutes	c__Clostridia	o__Clostridiales	f__Ruminococcaceae	Others	Others	0	0	0	0	0	0	0	0	0	0	3	0	0	0	0	0	12	0	0	0	0	0	0	0	7	0	0	0	0	0	0	0	0	0	0	0	0	0	0	0
OTU_294	k__Bacteria	p__Firmicutes	c__Erysipelotrichia	o__Erysipelotrichales	f__Erysipelotrichaceae	g__Dubosiella	s__Dubosiella_newyorkensis	104	94	76	151	0	0	6	0	0	0	0	0	0	0	3	0	14	0	0	37	16	49	3	0	0	0	0	0	0	0	0	0	0	0	0	0	5	8	18	2
OTU_295	k__Bacteria	p__Bacteroidetes	c__Bacteroidia	o__Bacteroidales	f__Muribaculaceae	g__	s__	0	0	0	0	0	0	1	0	0	0	3	0	0	0	0	12	0	0	0	0	0	0	0	0	12	0	0	0	0	0	0	0	0	0	87	7	0	0	0	4
OTU_296	k__Bacteria	p__Firmicutes	c__Clostridia	o__Clostridiales	f__Lachnospiraceae	Others	Others	4	23	40	11	29	20	9	4	0	9	27	12	3	3	16	14	25	2	6	27	4	1	6	1	30	50	0	31	3	18	17	22	5	56	4	7	16	12	54	0
OTU_297	k__Bacteria	p__Firmicutes	c__Clostridia	o__Clostridiales	f__Lachnospiraceae	Others	Others	3	1	11	3	7	59	155	47	10	180	5	0	2	2	0	0	22	0	0	0	0	12	10	44	0	2	10	142	36	0	0	130	0	232	2	19	5	2	4	6
OTU_298	k__Bacteria	p__Proteobacteria	c__Alphaproteobacteria	o__Sphingomonadales	f__Sphingomonadaceae	g__Sphingomonas	Others	8	0	8	2	5	0	0	12	2	5	4	26	3	24	3	12	0	0	7	0	0	74	2	2	1	3	2	1	25	10	3	34	0	0	2	14	2	3	15	7
OTU_299	k__Bacteria	p__Actinobacteria	c__Coriobacteriia	o__Coriobacteriales	f__Eggerthellaceae	g__Enterorhabdus	s__	0	3	4	5	2	1	0	5	0	0	1	0	0	12	1	93	0	2	0	1	9	13	19	2	45	0	0	4	61	0	2	8	3	0	0	0	0	0	0	8
OTU_300	k__Bacteria	p__Bacteroidetes	c__Bacteroidia	o__Bacteroidales	f__Muribaculaceae	g__	s__	0	0	0	0	0	0	0	0	0	6	18	5	0	0	8	0	0	0	36	0	7	0	37	0	0	0	0	0	0	2	0	20	121	0	0	0	4	0	0	0
OTU_301	k__Bacteria	p__Firmicutes	c__Clostridia	o__Clostridiales	f__Lachnospiraceae	Others	Others	0	0	0	0	0	0	15	0	2	0	0	2	0	0	0	0	28	6	0	2	3	0	0	19	0	0	19	49	13	0	34	0	0	0	53	6	50	13	2	0
OTU_302	k__Bacteria	p__Firmicutes	c__Clostridia	o__Clostridiales	f__Ruminococcaceae	g__unidentified_Ruminococcaceae	Others	4	1	5	0	3	2	0	3	0	5	0	2	2	15	2	2	0	1	1	4	0	0	4	3	24	2	2	5	8	5	2	6	0	10	9	17	7	7	5	1
OTU_303	k__Bacteria	p__Bacteroidetes	c__Bacteroidia	o__Bacteroidales	f__Prevotellaceae	Others	Others	0	204	1	2	0	0	0	12	0	0	0	0	0	0	0	0	0	0	0	0	1	0	3	0	0	0	0	0	239	0	0	0	0	0	0	0	0	0	0	0
OTU_304	k__Bacteria	p__Firmicutes	c__Clostridia	o__Clostridiales	f__Ruminococcaceae	Others	Others	0	1	2	0	33	2	42	7	0	2	182	132	7	93	1	5	0	139	5	6	0	6	11	813	0	0	0	3	10	0	0	2	0	1	0	1	0	102	3	5
OTU_305	k__Bacteria	p__Firmicutes	c__Clostridia	o__Clostridiales	f__Ruminococcaceae	Others	Others	0	0	2	0	0	0	4	0	0	0	0	0	5	4	13	16	0	3	0	0	0	0	2	0	9	1	0	0	5	2	0	4	0	0	9	2	7	0	0	1
OTU_306	k__Bacteria	p__Firmicutes	c__Clostridia	o__Clostridiales	f__Lachnospiraceae	Others	Others	0	40	7	0	348	78	7	1	0	1	0	10	7	17	252	0	336	6	0	1	32	0	0	2	0	1	1	0	21	0	1	0	0	22	49	22	0	3	2	0
OTU_307	k__Bacteria	p__Proteobacteria	c__Gammaproteobacteria	o__Enterobacteriales	f__Enterobacteriaceae	Others	Others	3	6	9	3	4	1	0	4	0	4	2	0	2	1	0	1	1	0	10	2	0	8	19	0	0	1	60	6	2	0	0	3	7	0	0	4	0	0	80	6
OTU_308	k__Bacteria	p__Firmicutes	c__Clostridia	o__Clostridiales	f__Lachnospiraceae	Others	Others	2	0	0	0	0	0	5	0	3	0	0	0	0	0	2	1	123	0	0	0	0	0	0	1	0	4	1	109	3	0	0	0	0	0	0	0	0	0	0	0
OTU_309	k__Bacteria	p__Proteobacteria	c__Deltaproteobacteria	o__Desulfovibrionales	f__Desulfovibrionaceae	g__Desulfovibrio	Others	0	0	0	0	0	0	0	0	0	0	1	0	0	0	0	0	0	0	0	0	0	0	0	1	0	0	0	0	0	0	0	0	0	0	0	0	0	0	0	0
OTU_310	k__Bacteria	p__Firmicutes	c__Clostridia	o__Clostridiales	f__Peptococcaceae	g__	s__	0	0	0	0	0	0	0	0	0	0	0	0	0	0	1	0	0	0	0	0	0	0	0	0	0	0	0	0	0	0	0	0	4	0	0	0	0	0	0	0
OTU_311	k__Bacteria	p__Firmicutes	c__Clostridia	o__Clostridiales	f__Lachnospiraceae	g__Lachnoclostridium	Others	3	5	3	2	0	0	0	7	0	0	0	0	0	0	0	3	0	0	0	0	0	4	3	0	0	0	0	1	0	0	0	0	0	0	2	8	0	0	0	4
OTU_312	k__Bacteria	p__Firmicutes	c__Clostridia	o__Clostridiales	f__Lachnospiraceae	Others	Others	0	0	0	0	0	0	108	0	0	0	0	0	0	0	2	0	0	3	0	0	0	0	0	0	0	0	0	4	0	0	0	0	0	0	0	0	0	0	0	0
OTU_314	k__Bacteria	p__Firmicutes	c__Clostridia	o__Clostridiales	f__Ruminococcaceae	g__	s__	5	1	2	3	6	0	6	0	0	0	2	1	10	2	23	12	10	0	16	0	1	1	0	1	8	0	0	0	26	0	1	0	3	2	0	10	4	8	1	2
OTU_315	k__Bacteria	p__Firmicutes	c__Clostridia	o__Clostridiales	Others	Others	Others	4	0	5	0	0	0	4	1	1	0	1	0	0	2	2	82	1	0	2	0	0	0	6	0	10	2	0	0	4	0	0	0	0	0	1	0	3	4	0	39
OTU_316	k__Bacteria	p__Actinobacteria	c__Coriobacteriia	o__Coriobacteriales	f__Eggerthellaceae	Others	Others	0	0	0	1	0	4	14	1	8	2	3	1	41	2	4	47	5	0	0	4	2	40	40	0	3	46	0	23	16	5	14	3	0	1	0	0	0	6	0	14
OTU_317	k__Bacteria	p__Firmicutes	c__Clostridia	o__Clostridiales	f__Lachnospiraceae	Others	Others	0	1	0	0	0	0	21	3	2	3	0	2	65	2	12	26	44	0	6	15	0	31	37	6	13	5	0	28	15	60	34	9	2	2	8	3	0	83	9	9
OTU_318	k__Bacteria	p__Firmicutes	c__Clostridia	o__Clostridiales	f__Lachnospiraceae	Others	Others	0	0	0	0	0	0	0	0	0	27	0	0	0	2	3	3	42	0	15	1	3	12	0	0	26	0	0	0	3	1	0	0	0	0	6	8	0	2	1	0
OTU_319	k__Bacteria	p__Firmicutes	c__Clostridia	o__Clostridiales	Others	Others	Others	5	0	2	3	1	0	2	0	0	10	0	0	0	0	18	0	5	0	0	0	0	11	0	0	0	0	0	4	31	0	0	0	15	0	0	0	0	8	0	0
OTU_320	k__Bacteria	p__Firmicutes	c__Clostridia	o__Clostridiales	f__unidentified_Clostridiales	g__unidentified_Clostridiales	Others	27	32	4	65	19	33	21	54	12	15	51	10	97	25	23	39	36	14	8	6	13	13	66	18	12	26	12	58	357	11	7	26	0	11	13	25	113	27	8	59
OTU_321	k__Bacteria	p__Tenericutes	c__Mollicutes	o__	f__	g__	s__	0	0	2	0	2	0	7	0	2	0	0	0	0	5	1	0	0	6	25	0	0	0	17	9	13	4	0	1	25	0	0	0	0	0	0	0	0	6	0	52
OTU_322	k__Bacteria	p__Firmicutes	c__Clostridia	o__Clostridiales	f__Ruminococcaceae	g__unidentified_Ruminococcaceae	Others	0	0	0	0	0	0	0	0	0	0	0	0	0	0	0	0	1	0	0	0	0	0	0	0	0	1	0	0	0	0	0	0	0	0	0	0	0	0	0	0
OTU_323	k__Bacteria	p__Actinobacteria	c__unidentified_Actinobacteria	o__Micrococcales	f__Micrococcaceae	Others	Others	0	0	0	1	0	0	0	0	0	0	0	0	0	0	0	0	0	0	0	0	0	0	0	0	0	0	0	0	0	0	0	0	0	0	0	0	0	0	0	0
OTU_324	k__Bacteria	p__Firmicutes	c__Clostridia	o__Clostridiales	f__Lachnospiraceae	Others	Others	0	0	2	1	133	108	4	134	3	49	6	199	2	2	749	1	0	2	104	3	43	1	5	2	13	0	4	6	0	2	608	101	0	638	1	0	729	533	4	0
OTU_325	k__Bacteria	p__Bacteroidetes	c__Bacteroidia	o__Bacteroidales	f__Rikenellaceae	g__Alistipes	Others	14	0	2	1	0	3	1	27	0	0	2	0	12	7	0	0	26	0	27	0	0	16	10	0	0	0	0	0	12	0	0	5	5	0	0	0	0	0	0	0
OTU_326	k__Bacteria	p__Firmicutes	c__Erysipelotrichia	o__Erysipelotrichales	f__Erysipelotrichaceae	Others	Others	0	0	0	0	0	0	0	2	0	0	1	0	2	1	64	4	6	0	1	0	9	5	0	4	0	0	0	40	2	12	0	184	53	5	0	0	0	0	0	3
OTU_327	k__Bacteria	p__Firmicutes	c__Clostridia	o__Clostridiales	f__Lachnospiraceae	Others	Others	0	0	0	0	1	0	0	3	8	0	88	0	18	0	0	54	0	0	34	1	0	0	8	0	0	5	0	4	0	0	0	18	12	0	0	1	0	2	0	0
OTU_328	k__Bacteria	p__Firmicutes	c__Clostridia	o__Clostridiales	f__Lachnospiraceae	Others	Others	0	0	0	0	0	0	0	0	0	0	0	0	0	1	3	0	0	0	0	0	0	1	2	0	0	0	0	4	0	2	0	0	0	4	1	0	0	0	0	0
OTU_329	k__Bacteria	p__Firmicutes	c__Clostridia	o__Clostridiales	f__Ruminococcaceae	Others	Others	0	1	0	0	0	1	1	1	0	0	0	0	14	0	24	210	0	3	0	0	0	0	0	2	0	0	0	6	22	0	0	0	0	0	2	0	0	0	0	129
OTU_330	k__Bacteria	p__Firmicutes	c__Clostridia	o__Clostridiales	f__Ruminococcaceae	g__Ruminiclostridium	s__	0	0	0	0	2	0	2	3	0	0	0	0	0	0	22	0	3	0	0	0	0	1	0	0	0	0	0	2	0	0	0	2	2	0	0	86	0	0	0	2
OTU_331	k__Bacteria	p__Firmicutes	c__Clostridia	o__Clostridiales	f__Ruminococcaceae	g__Subdoligranulum	s__	0	3	0	0	0	4	0	19	0	4	0	0	0	0	0	0	0	0	0	0	0	0	16	0	0	0	2	0	27	3	0	0	2	0	0	0	2	0	0	0
OTU_332	k__Bacteria	p__Firmicutes	c__Clostridia	o__Clostridiales	f__Ruminococcaceae	Others	Others	0	0	4	0	1	0	1	0	0	6	0	0	3	0	5	4	1	1	3	2	0	0	0	1	6	0	2	0	8	0	0	0	0	2	12	2	3	4	4	0
OTU_334	k__Bacteria	p__Firmicutes	c__Clostridia	o__Clostridiales	f__Ruminococcaceae	Others	Others	8	0	7	6	46	3	0	2	0	2	5	0	1	12	10	2	0	1	0	2	0	3	63	15	5	3	0	26	6	25	0	1	0	0	4	2	0	2	0	7
OTU_335	k__Bacteria	p__Firmicutes	c__Clostridia	o__Clostridiales	f__Lachnospiraceae	g__unidentified_Lachnospiraceae	s__Clostridium_sp_Clone-17	22	24	5	35	2	6	26	12	14	5	17	29	22	31	25	28	32	3	33	8	0	4	29	36	17	7	3	31	28	9	0	7	3	8	4	18	5	9	4	15
OTU_336	k__Bacteria	p__Actinobacteria	c__Coriobacteriia	o__Coriobacteriales	f__Eggerthellaceae	Others	Others	0	0	0	0	1	0	0	0	2	3	0	10	6	8	0	12	8	0	7	0	13	32	0	0	2	1	3	5	25	35	1	11	0	0	2	28	0	2	0	10
OTU_337	k__Bacteria	p__Firmicutes	c__Clostridia	o__Clostridiales	f__Lachnospiraceae	Others	Others	0	0	0	2	2	1	5	5	4	4	5	0	26	3	2	3	0	3	6	6	0	6	1	5	4	1	2	9	10	16	0	8	2	5	2	9	0	0	7	5
OTU_338	k__Bacteria	p__Firmicutes	c__Clostridia	o__Clostridiales	f__Lachnospiraceae	g__Tyzzerella	s__	0	0	0	0	0	0	1	6	0	0	1	58	1	0	1	0	0	0	0	0	0	0	0	0	6	0	0	3	3	0	0	0	1	0	0	1	0	0	0	5
OTU_339	k__Bacteria	p__Firmicutes	c__Clostridia	o__Clostridiales	f__Lachnospiraceae	g__unidentified_Lachnospiraceae	s__Lachnospiraceae_bacterium_DW67	1	4	0	0	7	1	2	2	1	3	2	3	61	22	0	0	12	13	0	0	0	7	0	9	8	0	5	7	11	0	0	3	0	6	8	0	0	1	0	0
OTU_340	k__Bacteria	p__Firmicutes	c__Clostridia	o__Clostridiales	f__Ruminococcaceae	Others	Others	0	0	0	0	2	3	24	2	0	0	1	0	13	0	0	5	10	4	0	0	0	1	5	0	0	0	2	0	5	0	0	0	10	1	0	37	2	0	0	1
OTU_341	k__Bacteria	p__Firmicutes	c__Clostridia	o__Clostridiales	f__Lachnospiraceae	Others	Others	5	9	8	10	1	1	30	3	11	9	29	10	19	0	4	0	5	2	0	0	2	0	2	3	2	5	2	18	55	76	7	7	7	0	3	15	0	10	4	0
OTU_342	k__Bacteria	p__Firmicutes	c__Clostridia	o__Clostridiales	f__Ruminococcaceae	Others	Others	0	5	6	0	1	0	3	0	0	2	2	0	0	0	0	0	0	10	0	0	1	0	5	12	9	3	0	0	0	0	0	0	0	0	1	17	0	0	0	1
OTU_343	k__Bacteria	p__Firmicutes	c__Clostridia	o__Clostridiales	f__Lachnospiraceae	Others	Others	18	0	0	10	0	0	0	0	0	0	0	0	0	0	0	30	0	0	0	7	3	2	0	3	12	0	2	0	8	0	1	0	0	8	15	0	4	0	5	7
OTU_344	k__Bacteria	p__Firmicutes	c__Clostridia	o__Clostridiales	f__Ruminococcaceae	g__Oscillibacter	s__	16	6	4	7	4	0	4	8	0	4	5	5	21	5	44	8	5	1	4	3	4	0	0	2	4	3	1	3	8	3	0	13	1	5	5	5	2	1	2	0
OTU_345	k__Bacteria	p__Tenericutes	c__Mollicutes	o__	f__	g__	s__	0	0	0	0	0	3	0	0	0	0	0	0	0	0	0	0	0	0	0	0	0	16	0	0	0	0	0	0	0	0	0	0	0	0	0	0	0	47	0	0
OTU_346	k__Bacteria	p__Firmicutes	c__Clostridia	o__Clostridiales	f__Lachnospiraceae	Others	Others	3	4	2	3	0	1	5	4	0	0	1	0	5	2	0	0	0	2	0	2	0	1	0	0	0	0	2	12	1	0	0	10	4	9	16	0	0	0	4	0
OTU_347	k__Bacteria	p__Firmicutes	c__Clostridia	o__Clostridiales	f__Ruminococcaceae	Others	Others	0	0	3	0	0	0	2	0	0	0	0	0	5	0	3	1	0	0	2	0	0	0	0	0	8	0	0	0	13	2	0	2	1	0	9	7	0	2	2	0
OTU_348	k__Bacteria	p__Tenericutes	c__Mollicutes	o__	f__	g__	s__	0	0	0	0	0	0	2	2	0	0	3	0	4	0	6	13	6	7	4	0	0	2	14	0	0	0	0	9	0	0	0	0	0	0	4	0	0	0	0	3
OTU_349	k__Bacteria	p__Firmicutes	c__Clostridia	o__Clostridiales	f__Ruminococcaceae	Others	Others	0	0	0	0	0	0	0	6	0	0	0	0	0	0	0	0	0	0	0	0	0	0	3	0	0	0	0	0	0	2	0	0	0	0	0	0	0	0	0	0
OTU_350	k__Bacteria	p__Firmicutes	c__Clostridia	o__Clostridiales	Others	Others	Others	0	5	5	3	0	3	0	0	0	0	2	4	14	7	9	5	0	0	0	4	1	1	0	6	2	2	0	8	2	0	0	7	10	6	28	0	3	2	7	4
OTU_351	k__Bacteria	p__Tenericutes	c__Mollicutes	o__	f__	g__	s__	3	0	0	1	0	0	0	4	0	0	4	0	0	0	28	26	0	0	0	0	16	2	0	0	0	0	0	227	95	0	0	0	0	0	0	0	0	1	5	29
OTU_352	k__Bacteria	p__Firmicutes	c__Clostridia	o__Clostridiales	f__Lachnospiraceae	g__Roseburia	s__Lachnospiraceae_bacterium_DW52	3	0	0	0	0	0	0	0	0	0	0	10	210	0	0	0	0	0	0	3	0	2	0	0	1	4	28	4	36	0	8	3	28	2	0	0	1	1	12	0
OTU_353	k__Bacteria	p__Firmicutes	c__Clostridia	o__Clostridiales	f__Ruminococcaceae	Others	Others	0	1	0	0	0	0	3	0	0	0	0	0	0	0	0	6	0	0	0	0	0	0	0	0	3	0	0	0	1	0	0	0	0	0	2	0	0	4	6	0
OTU_354	k__Archaea	p__Euryarchaeota	c__Methanomicrobia	o__Methanosarcinales	f__Methanosaetaceae	g__Methanosaeta	s__	0	0	0	0	0	330	0	1	0	0	0	3	0	0	0	0	0	0	0	0	0	0	0	0	0	2	0	0	0	0	0	0	0	3	0	0	0	0	0	0
OTU_355	k__Bacteria	p__Tenericutes	c__Mollicutes	o__	f__	g__	s__	45	14	5	19	0	0	5	0	1	17	4	0	0	6	0	6	5	1	26	0	0	17	15	10	2	4	2	13	39	4	3	2	0	0	2	2	0	24	0	71
OTU_356	k__Bacteria	p__Firmicutes	c__Clostridia	o__Clostridiales	f__Lachnospiraceae	g__Roseburia	Others	0	16	1	0	0	0	39	5	0	0	2	0	91	17	2	18	4	33	0	0	0	0	4	30	93	0	0	0	6	0	0	0	1	0	0	0	0	0	0	2
OTU_357	k__Bacteria	p__Firmicutes	c__Clostridia	o__Clostridiales	f__Lachnospiraceae	Others	Others	0	1	4	0	0	0	7	1	0	0	3	0	0	6	9	0	13	1	0	4	5	6	5	8	0	0	0	7	11	2	2	0	0	0	10	0	0	2	2	0
OTU_358	k__Bacteria	p__Proteobacteria	c__Alphaproteobacteria	o__unidentified_Alphaproteobacteria	f__unidentified_Alphaproteobacteria	g__Zavarzinia	s__	0	2	0	0	3	0	0	3	3	1	0	0	0	5	0	0	0	0	2	0	0	0	0	0	0	0	0	0	0	0	2	2	0	0	0	0	0	0	0	0
OTU_359	k__Bacteria	p__Firmicutes	c__Clostridia	o__Clostridiales	f__Ruminococcaceae	Others	Others	1	0	0	0	4	1	2	8	0	0	37	0	20	14	0	10	5	3	5	2	0	0	11	1	0	2	0	5	5	2	0	0	0	0	1	3	3	1	0	0
OTU_360	k__Bacteria	Others	Others	Others	Others	Others	Others	2	0	0	4	18	11	2	14	1	1	0	0	0	1	0	8	0	0	12	5	0	0	0	0	8	0	0	2	20	1	0	15	0	0	0	0	3	0	6	2
OTU_361	k__Bacteria	p__Firmicutes	c__Clostridia	o__Clostridiales	f__Ruminococcaceae	g__unidentified_Ruminococcaceae	Others	0	0	7	0	0	0	0	0	0	3	0	0	0	0	10	0	2	0	2	4	0	1	0	10	0	0	0	6	70	0	0	0	0	0	3	29	0	0	6	0
OTU_362	k__Bacteria	p__Firmicutes	c__Clostridia	o__Clostridiales	f__Ruminococcaceae	Others	Others	10	0	9	1	11	0	0	3	0	0	1	20	0	14	0	5	4	0	5	0	0	0	0	12	5	2	2	5	36	12	0	0	1	0	14	12	0	0	0	4
OTU_363	k__Bacteria	p__Firmicutes	c__Clostridia	o__Clostridiales	f__Ruminococcaceae	Others	Others	0	0	0	0	0	0	1	1	0	0	0	4	1	1	2	2	0	3	0	7	0	0	2	1	1	2	0	0	3	2	0	1	5	6	15	5	9	1	10	1
OTU_364	k__Bacteria	p__Firmicutes	c__Clostridia	o__Clostridiales	f__Lachnospiraceae	Others	Others	0	0	0	0	8	4	7	0	0	0	4	0	7	0	0	32	0	0	0	0	0	0	2	0	1	0	0	0	7	0	0	0	0	0	108	0	0	0	0	0
OTU_365	k__Bacteria	p__Firmicutes	c__Clostridia	o__Clostridiales	f__Ruminococcaceae	Others	Others	0	0	0	0	0	0	0	0	0	0	1	0	0	0	0	0	0	0	0	0	0	0	0	0	1	0	0	0	0	0	0	0	1	0	135	0	0	0	0	0
OTU_366	k__Bacteria	p__Firmicutes	c__Clostridia	o__Clostridiales	f__Ruminococcaceae	g__	s__	0	4	0	0	0	0	0	0	0	0	0	0	0	0	0	1	0	0	0	0	0	0	6	0	0	0	0	0	334	0	0	0	0	0	0	0	0	0	0	0
OTU_367	k__Bacteria	p__Bacteroidetes	c__Bacteroidia	o__Bacteroidales	f__	g__	s__	0	0	0	0	0	218	0	2	0	0	0	0	0	0	0	0	0	0	0	0	0	0	0	0	0	0	0	0	0	0	3	0	1	0	0	0	0	0	0	0
OTU_368	k__Bacteria	p__Tenericutes	c__Mollicutes	Others	Others	Others	Others	0	7	9	1	0	0	13	0	3	0	63	7	11	0	0	37	1	0	0	0	0	0	11	0	15	3	2	0	31	0	0	0	0	2	0	0	0	0	0	11
OTU_369	k__Bacteria	p__Bacteroidetes	c__Bacteroidia	o__Bacteroidales	f__Tannerellaceae	g__Parabacteroides	s__	0	0	0	0	0	0	0	0	0	0	0	0	0	0	0	0	0	0	0	0	0	0	0	0	0	0	0	0	276	0	0	0	1	0	0	0	0	0	0	0
OTU_370	k__Bacteria	p__Firmicutes	c__Clostridia	o__Clostridiales	Others	Others	Others	0	0	2	0	0	0	0	5	0	0	0	0	5	0	5	2	0	0	0	1	0	0	3	0	3	0	0	0	0	3	0	4	7	2	6	5	0	0	2	2
OTU_371	k__Bacteria	p__Bacteroidetes	c__Bacteroidia	o__Bacteroidales	f__Rikenellaceae	g__Alistipes	s__	0	0	0	0	0	0	3	0	0	0	0	0	0	0	8	1	3	0	0	2	3	0	1	0	8	0	0	1	6	0	0	0	4	0	11	1	0	1	2	0
OTU_372	k__Bacteria	p__Firmicutes	c__Clostridia	o__Clostridiales	f__Lachnospiraceae	Others	Others	0	0	0	0	0	1	0	2	0	1	0	0	18	15	14	0	4	3	5	0	0	0	24	4	11	0	4	59	16	12	0	0	0	2	4	0	17	1	0	0
OTU_373	k__Bacteria	p__Firmicutes	c__Clostridia	o__Clostridiales	f__Ruminococcaceae	g__unidentified_Ruminococcaceae	Others	2	0	0	3	0	0	0	0	0	0	0	0	0	152	4	0	0	0	0	0	0	0	0	29	0	0	0	0	2	0	0	0	0	0	0	0	0	0	4	0
OTU_374	k__Bacteria	p__Firmicutes	c__Clostridia	o__Clostridiales	f__Lachnospiraceae	g__unidentified_Lachnospiraceae	Others	0	3	0	0	0	0	0	23	0	0	0	5	0	0	0	0	0	0	0	0	0	0	17	0	0	0	2	0	9	0	0	0	0	0	1	0	2	1	1	0
OTU_375	k__Bacteria	p__Firmicutes	c__Bacilli	o__Lactobacillales	f__Aerococcaceae	g__Facklamia	s__	0	0	0	0	1	0	0	0	1	0	0	0	0	0	0	0	0	0	0	0	0	0	0	0	3	0	0	0	0	0	0	1	0	2	0	0	0	0	0	0
OTU_376	k__Bacteria	p__Firmicutes	c__Clostridia	o__Clostridiales	f__Ruminococcaceae	Others	Others	7	4	2	1	0	0	0	0	0	0	0	0	3	0	0	6	0	0	4	0	0	0	2	5	1	0	1	0	5	5	0	6	2	5	0	4	16	0	3	0
OTU_377	k__Bacteria	p__Bacteroidetes	c__Bacteroidia	o__Bacteroidales	f__Rikenellaceae	g__Alistipes	s__	1	1	0	0	0	0	4	29	0	0	0	0	0	0	7	0	0	0	5	0	0	0	0	0	0	0	0	0	0	4	0	0	1	0	8	0	0	0	0	0
OTU_378	k__Bacteria	p__Firmicutes	c__Clostridia	o__Clostridiales	f__Ruminococcaceae	g__Anaerotruncus	Others	0	0	0	2	0	0	0	0	0	0	0	0	0	0	0	0	0	0	0	2	0	0	1	0	0	0	0	0	0	1	0	0	1	0	0	0	2	0	0	2
OTU_380	k__Bacteria	p__Proteobacteria	c__Alphaproteobacteria	o__Rhodospirillales	f__	g__	s__	14	2	0	1	0	0	1	0	0	0	0	0	5	2	2	0	0	2	0	0	0	0	3	0	7	0	1	3	0	0	0	1	4	0	0	0	1	0	0	1
OTU_381	k__Bacteria	p__Firmicutes	c__Clostridia	o__Clostridiales	Others	Others	Others	0	0	0	0	0	0	0	0	0	0	0	0	0	0	1	0	0	0	0	0	0	0	0	0	0	0	0	0	0	0	0	0	0	0	0	0	0	0	0	0
OTU_382	k__Bacteria	p__Tenericutes	c__Mollicutes	o__	f__	g__	s__	6	4	3	3	9	2	8	8	3	13	8	12	2	5	3	18	2	4	4	0	0	15	6	3	0	13	3	4	3	4	0	0	1	0	3	2	9	6	4	86
OTU_383	k__Bacteria	p__Firmicutes	c__Clostridia	o__Clostridiales	f__Ruminococcaceae	g__unidentified_Ruminococcaceae	s__Clostridium_sp_Culture_Jar-8	0	0	0	0	0	0	0	2	0	2	1	0	5	1	18	32	3	2	1	1	0	1	4	1	8	0	0	5	7	1	0	4	0	6	12	5	0	0	0	0
OTU_384	k__Bacteria	p__Firmicutes	c__Clostridia	o__Clostridiales	f__Lachnospiraceae	Others	Others	1	16	6	3	4	1	8	4	0	8	3	62	0	6	22	0	2	0	4	0	2	7	10	17	0	0	0	3	1	1	3	2	0	10	12	58	1	42	0	22
OTU_385	k__Bacteria	p__Spirochaetes	c__Spirochaetia	o__Spirochaetales	f__Spirochaetaceae	g__unidentified_Spirochaetaceae	s__Spirochaetaceae_bacterium_SURF-1	0	0	0	0	0	0	0	0	0	0	0	0	0	0	0	0	0	0	0	4	0	0	0	0	0	0	0	0	0	0	0	0	0	0	0	0	0	0	0	0
OTU_386	k__Bacteria	p__Tenericutes	c__Mollicutes	o__	f__	g__	s__	0	0	0	0	0	0	0	0	0	0	0	0	0	0	0	0	0	0	0	0	0	0	0	0	0	0	0	0	0	0	0	0	0	0	31	0	0	0	0	0
OTU_387	k__Bacteria	p__Firmicutes	c__Clostridia	o__Clostridiales	f__Lachnospiraceae	Others	Others	7	0	0	2	0	0	0	0	0	0	0	5	0	0	0	3	0	0	0	0	0	0	1	0	0	0	0	0	4	0	0	0	0	0	2	0	0	0	0	0
OTU_388	k__Bacteria	p__Firmicutes	c__Bacilli	o__Lactobacillales	f__Streptococcaceae	g__Streptococcus	Others	0	8	25	0	0	0	0	11	0	0	0	0	3	0	0	2	1	0	3	0	0	0	4	3	0	0	453	0	0	2	80	1	0	0	0	0	0	0	56	19
OTU_389	k__Bacteria	p__Firmicutes	c__Clostridia	o__Clostridiales	f__Lachnospiraceae	g__Roseburia	s__	2	0	0	2	3	0	19	29	0	3	14	0	28	5	20	5	10	1	5	0	1	3	3	4	4	3	1	350	29	11	0	178	27	0	303	4	9	0	0	32
OTU_390	k__Bacteria	p__Tenericutes	c__Mollicutes	o__	f__	g__	s__	2	1	4	0	11	10	0	0	7	0	2	3	20	3	210	5	11	4	17	0	3	8	30	8	5	6	1	7	53	0	0	3	6	0	3	0	0	0	1	0
OTU_391	k__Bacteria	p__Firmicutes	c__Clostridia	o__Clostridiales	f__Ruminococcaceae	Others	Others	0	3	2	0	0	0	1	0	0	0	0	0	0	0	0	0	0	3	0	0	0	0	0	0	0	1	0	0	297	0	0	0	0	0	0	0	0	0	0	1
OTU_392	k__Bacteria	p__Firmicutes	c__Clostridia	o__Clostridiales	f__Lachnospiraceae	Others	Others	0	0	0	0	0	0	1	0	0	0	0	0	0	1	3	2	3	0	6	0	2	1	0	0	6	0	0	2	21	1	0	0	0	0	0	0	1	0	1	0
OTU_393	k__Bacteria	p__Actinobacteria	c__unidentified_Actinobacteria	o__Micrococcales	f__Intrasporangiaceae	g__Oryzihumus	s__	0	1	0	0	0	0	0	0	0	0	0	1	0	0	0	0	0	0	0	0	0	2	0	0	0	0	0	0	1	0	0	0	0	0	0	0	0	0	0	1
OTU_394	k__Bacteria	p__Synergistetes	c__Synergistia	o__Synergistales	f__Synergistaceae	g__Aminivibrio	s__	0	0	0	0	0	315	0	1	1	0	0	0	0	0	0	0	0	0	1	0	0	0	0	0	0	0	0	0	0	0	0	0	0	0	0	0	0	0	0	0
OTU_395	k__Bacteria	p__Bacteroidetes	c__Bacteroidia	o__Bacteroidales	f__Bacteroidaceae	g__Bacteroides	s__Bacteroides_intestinalis	0	0	0	0	0	0	0	2	0	0	0	0	0	0	0	0	0	0	0	0	0	0	1	0	0	0	0	0	4	0	0	0	0	0	0	0	0	0	0	0
OTU_396	k__Bacteria	p__Firmicutes	c__Clostridia	o__Clostridiales	f__Lachnospiraceae	Others	Others	1	10	3	10	0	3	5	2	0	0	2	5	6	0	0	1	5	0	0	2	4	1	4	0	1	1	0	15	18	1	0	5	0	0	4	4	7	4	3	4
OTU_397	k__Bacteria	p__Firmicutes	c__Clostridia	o__Clostridiales	f__Lachnospiraceae	g__Roseburia	Others	2	3	3	2	25	7	0	13	0	0	0	1	21	6	0	0	0	0	0	0	2	0	0	119	82	0	15	0	3	0	0	2	6	2	93	16	0	0	0	0
OTU_398	k__Bacteria	p__Firmicutes	c__Clostridia	o__Clostridiales	f__Lachnospiraceae	Others	Others	0	0	0	1	9	9	0	4	0	1	0	0	9	16	0	3	3	0	0	140	3	1	0	33	1	126	0	9	1	14	0	1	1	1	1	11	6	3	351	10
OTU_399	k__Bacteria	p__Bacteroidetes	c__Bacteroidia	o__Bacteroidales	f__Prevotellaceae	g__Alloprevotella	s__Prevotellamassilia_timonensis	0	16	0	0	0	2	0	1	0	0	0	0	0	0	0	0	0	0	0	0	0	0	3	0	0	0	0	0	0	0	0	0	0	0	0	0	0	0	0	0
OTU_400	k__Bacteria	p__Firmicutes	c__Clostridia	o__Clostridiales	Others	Others	Others	0	0	0	0	0	0	0	0	0	0	0	0	0	0	0	0	0	0	0	0	0	0	0	0	0	0	0	0	219	0	0	0	0	0	0	0	0	0	0	0
OTU_401	k__Bacteria	p__Firmicutes	c__Clostridia	o__Clostridiales	f__Lachnospiraceae	Others	Others	0	20	39	3	0	0	8	0	0	0	13	7	1	269	7	0	15	0	0	2	35	2	1	127	0	11	0	64	114	0	0	0	2	0	7	2	0	1	0	1
OTU_402	k__Bacteria	p__Firmicutes	c__Clostridia	o__Clostridiales	f__Ruminococcaceae	Others	Others	0	0	0	0	1	0	0	0	0	2	0	0	5	0	1	0	5	0	3	0	0	0	0	0	0	0	0	4	1	1	0	3	0	0	4	0	1	0	0	0
OTU_403	k__Bacteria	p__Firmicutes	c__Clostridia	o__Clostridiales	f__Lachnospiraceae	Others	Others	0	0	3	4	2	0	2	3	0	0	0	0	0	3	0	0	0	21	0	0	2	90	0	0	0	0	0	0	0	0	0	0	0	0	0	94	0	4	0	4
OTU_404	k__Bacteria	p__Firmicutes	c__Clostridia	o__Clostridiales	f__Ruminococcaceae	Others	Others	0	3	1	0	0	0	0	1	0	0	10	0	7	0	0	8	1	0	0	0	0	0	0	0	0	6	0	2	2	0	1	4	2	0	0	0	0	0	2	2
OTU_405	k__Bacteria	p__Firmicutes	c__Clostridia	o__Clostridiales	f__Ruminococcaceae	Others	Others	1	0	7	0	0	0	1	8	0	0	0	0	1	0	2	3	0	1	2	0	0	0	0	0	4	2	0	0	1	0	0	0	0	3	1	1	5	0	0	0
OTU_407	k__Bacteria	p__Firmicutes	c__Clostridia	o__Clostridiales	f__Lachnospiraceae	Others	Others	2	6	3	6	3	0	6	0	2	0	10	4	5	0	17	4	3	0	2	6	0	7	8	0	1	18	0	25	6	7	8	12	0	1	2	2	0	2	3	12
OTU_408	k__Bacteria	p__Bacteroidetes	c__Bacteroidia	o__Bacteroidales	f__Muribaculaceae	g__	s__	0	0	0	0	0	0	0	0	0	0	2	0	0	0	0	0	0	0	2	0	0	0	1	0	0	0	0	0	0	0	0	1	5	0	0	0	0	0	0	0
OTU_409	k__Bacteria	p__Firmicutes	c__Clostridia	o__Clostridiales	f__Ruminococcaceae	g__Candidatus_Soleaferrea	s__Bittarella_massiliensis	0	0	0	0	0	2	2	0	0	0	6	1	0	0	0	2	0	0	0	0	2	0	0	0	0	0	0	6	1	0	0	0	0	0	0	0	0	0	0	2
OTU_410	k__Bacteria	p__Firmicutes	c__Clostridia	o__Clostridiales	f__Lachnospiraceae	Others	Others	0	0	7	0	0	0	0	0	2	0	0	0	24	3	11	0	0	0	0	0	0	0	0	0	0	0	0	9	1	0	0	6	39	0	0	0	0	0	7	7
OTU_411	k__Bacteria	p__Actinobacteria	c__unidentified_Actinobacteria	o__Corynebacteriales	f__Corynebacteriaceae	g__Corynebacterium	Others	0	9	4	0	0	1	3	0	0	0	0	2	6	0	0	0	0	0	3	2	2	3	0	0	0	0	0	2	0	2	0	0	0	0	0	0	1	0	5	1
OTU_412	k__Bacteria	p__Bacteroidetes	c__Bacteroidia	o__Bacteroidales	f__Rikenellaceae	g__Alistipes	s__Tidjanibacter_massiliensis	0	0	0	0	0	0	0	0	0	1	0	0	0	0	2	0	0	0	54	2	0	0	0	0	0	0	0	0	0	0	0	19	0	0	0	0	0	5	5	0
OTU_413	k__Bacteria	p__Bacteroidetes	c__Bacteroidia	o__Bacteroidales	f__Muribaculaceae	g__	s__	4	0	7	0	0	2	3	1	0	0	3	3	0	0	3	0	0	0	5	0	6	5	8	3	0	1	0	0	0	0	0	0	4	1	1	0	0	5	8	0
OTU_414	k__Bacteria	p__Actinobacteria	c__Coriobacteriia	o__Coriobacteriales	f__Eggerthellaceae	g__Enterorhabdus	s__	1	4	0	4	6	6	0	2	0	0	6	13	2	0	2	6	6	0	0	1	2	30	0	0	3	0	1	3	4	1	3	1	0	3	4	0	0	2	0	3
OTU_415	k__Bacteria	p__Firmicutes	c__Clostridia	o__Clostridiales	f__Ruminococcaceae	Others	Others	3	0	3	0	0	0	2	5	0	0	0	0	0	2	9	1	1	0	0	0	0	0	1	0	1	0	0	0	3	0	0	0	2	0	5	3	0	0	0	0
OTU_416	k__Bacteria	p__Actinobacteria	c__Coriobacteriia	o__Coriobacteriales	f__Coriobacteriaceae	g__Collinsella	s__Collinsella_aerofaciens	0	1	0	0	0	0	0	3	0	0	0	0	0	0	0	0	0	0	0	0	0	0	10	0	0	0	0	0	0	0	0	0	1	0	0	0	0	3	4	0
OTU_417	k__Bacteria	p__Firmicutes	c__Erysipelotrichia	o__Erysipelotrichales	f__Erysipelotrichaceae	g__unidentified_Erysipelotrichaceae	s__bacterium_LF-3	0	1	0	3	2	0	0	10	0	0	0	0	0	0	0	0	1	0	0	0	2	0	9	0	0	2	0	0	1	0	0	1	23	0	1	0	0	1	1	0
OTU_418	k__Bacteria	p__Firmicutes	c__Clostridia	o__Clostridiales	f__unidentified_Clostridiales	g__unidentified_Clostridiales	Others	0	0	0	0	2	0	0	0	0	0	9	2	0	0	1	0	0	0	0	0	0	0	0	0	0	0	0	0	0	0	0	0	0	0	2	0	10	7	0	4
OTU_419	k__Bacteria	p__Firmicutes	c__Negativicutes	o__Selenomonadales	f__Acidaminococcaceae	g__Phascolarctobacterium	Others	0	0	0	0	0	0	0	0	0	0	0	0	0	0	2	0	0	0	0	0	3	0	0	0	0	1	0	0	209	0	0	0	0	0	0	0	0	0	0	0
OTU_420	k__Bacteria	p__Firmicutes	c__Clostridia	o__Clostridiales	f__Lachnospiraceae	Others	Others	3	4	0	4	3	1	1	1	5	0	10	7	0	2	0	0	2	0	0	0	2	0	7	3	0	0	2	2	8	4	6	13	3	0	3	6	1	0	0	8
OTU_421	k__Bacteria	p__Firmicutes	c__Clostridia	o__Clostridiales	f__Ruminococcaceae	g__Oscillibacter	s__	0	0	0	0	0	0	0	0	0	0	0	0	3	0	0	0	0	0	0	0	0	0	2	1	2	0	0	0	1	0	0	0	0	0	12	2	0	0	0	0
OTU_422	k__Bacteria	p__Firmicutes	c__Clostridia	o__Clostridiales	f__Lachnospiraceae	Others	Others	5	11	5	13	2	2	0	13	0	0	5	0	75	4	2	30	12	0	2	0	2	0	11	5	10	3	3	2	9	3	0	15	2	5	20	0	3	0	8	3
OTU_423	k__Bacteria	p__Firmicutes	c__Erysipelotrichia	o__Erysipelotrichales	f__Erysipelotrichaceae	g__Dubosiella	s__	4	2	2	9	49	68	53	68	631	206	183	143	6	51	88	0	24	1	68	138	59	44	74	83	0	501	19	0	0	0	485	53	79	99	53	74	7	25	74	2
OTU_424	k__Bacteria	p__Firmicutes	c__Clostridia	o__Clostridiales	f__Ruminococcaceae	Others	Others	0	1	1	0	0	0	3	18	4	0	2	42	15	4	13	21	14	5	6	0	1	6	0	0	20	3	1	15	64	13	0	5	0	0	6	0	0	1	0	7
OTU_425	k__Bacteria	p__Firmicutes	c__Clostridia	o__Clostridiales	f__Lachnospiraceae	Others	Others	2	0	0	0	0	0	0	0	0	0	0	0	4	0	1	2	4	0	0	1	0	0	0	0	3	0	0	0	0	1	0	2	2	4	1	2	0	0	0	0
OTU_426	k__Bacteria	p__Firmicutes	c__Clostridia	o__Clostridiales	f__Lachnospiraceae	Others	Others	0	0	0	0	0	0	2	0	0	0	0	0	0	12	0	0	0	0	0	0	0	0	0	0	0	0	0	4	0	0	0	0	0	0	0	0	0	0	0	0
OTU_427	k__Bacteria	p__Bacteroidetes	c__Bacteroidia	o__Bacteroidales	f__Muribaculaceae	g__	s__	0	0	0	0	0	0	0	0	0	0	0	0	0	0	0	0	0	0	0	0	0	0	0	0	1	0	0	0	219	0	0	0	0	0	0	0	0	0	0	0
OTU_428	k__Bacteria	p__Tenericutes	c__Mollicutes	o__	f__	g__	s__	0	0	0	3	0	10	1	0	0	0	0	0	1	1	34	6	0	1	27	0	0	2	2	0	0	0	0	4	0	0	0	0	0	0	0	0	0	0	0	60
OTU_429	k__Bacteria	p__Firmicutes	c__Clostridia	o__Clostridiales	f__Ruminococcaceae	Others	Others	0	0	1	3	0	3	4	0	2	177	34	4	0	0	111	17	1	0	0	64	23	0	0	0	453	0	0	2	0	0	2	2	33	0	205	8	0	13	41	1
OTU_430	k__Bacteria	p__Firmicutes	c__Clostridia	o__Clostridiales	f__Lachnospiraceae	Others	Others	3	2	4	1	2	2	3	6	0	0	277	747	88	3	13	80	3	0	0	2	2	0	53	13	101	4	1	3	43	22	0	28	189	9	1	2	0	1	0	215
OTU_431	k__Bacteria	p__Firmicutes	c__Clostridia	o__Clostridiales	f__Lachnospiraceae	Others	Others	0	1	0	0	0	0	1	0	0	0	3	0	3	5	1	2	1	5	1	0	4	0	3	5	0	2	0	0	0	0	0	0	3	0	3	0	0	0	1	0
OTU_432	k__Bacteria	p__Firmicutes	c__Clostridia	o__Clostridiales	f__Lachnospiraceae	g__Roseburia	s__	0	2	18	0	0	0	5	0	0	0	0	0	69	0	0	1	0	0	0	0	0	0	0	2	0	0	0	0	0	0	0	0	0	0	58	0	0	0	0	0
OTU_433	k__Bacteria	p__Firmicutes	c__Clostridia	o__Clostridiales	f__Lachnospiraceae	Others	Others	4	1	0	2	0	0	0	9	0	0	1	0	32	0	2	0	23	0	0	0	1	4	0	0	4	0	0	2	7	26	0	3	11	0	2	5	0	2	0	1
OTU_434	k__Bacteria	p__Proteobacteria	c__Alphaproteobacteria	o__unidentified_Alphaproteobacteria	f__unidentified_Alphaproteobacteria	g__unidentified_Alphaproteobacteria	s__Alphaproteobacteria_bacterium_CG1_02_46_17	0	4	0	0	0	0	0	2	4	0	0	0	0	1	0	3	0	0	0	0	0	0	0	0	1	0	0	1	1	0	6	0	1	0	0	1	0	0	0	3
OTU_435	k__Bacteria	p__Firmicutes	c__Clostridia	o__Clostridiales	f__Ruminococcaceae	Others	Others	0	0	0	0	0	0	0	1	0	0	0	0	0	0	0	0	0	0	0	0	0	0	0	0	0	0	0	0	193	0	0	0	0	0	0	0	0	0	0	0
OTU_436	k__Bacteria	p__Firmicutes	c__Clostridia	o__Clostridiales	f__Lachnospiraceae	Others	Others	23	2	0	7	0	0	23	5	0	4	4	9	6	10	14	14	9	5	0	0	0	0	6	20	6	1	0	4	4	2	0	1	5	1	10	17	0	0	2	7
OTU_437	k__Bacteria	p__Tenericutes	c__Mollicutes	Others	Others	Others	Others	1	0	0	2	3	6	0	0	1	0	0	0	0	0	0	13	0	2	1	0	0	4	15	0	0	0	0	5	0	4	0	0	0	6	2	0	0	0	0	0
OTU_440	k__Bacteria	p__Firmicutes	c__Bacilli	o__Lactobacillales	f__Aerococcaceae	g__Aerococcus	s__Aerococcus_viridans	0	0	0	0	0	0	0	0	0	1	9	0	0	2	1	0	6	2	0	0	9	17	0	0	0	0	0	0	0	0	0	4	0	3	0	0	0	0	0	0
OTU_441	k__Bacteria	p__Chloroflexi	c__Anaerolineae	o__Anaerolineales	f__Anaerolineaceae	Others	Others	0	0	0	0	0	248	0	0	0	0	0	0	0	0	0	0	0	0	0	0	0	2	0	0	0	0	0	0	0	0	0	2	0	0	0	0	0	0	2	0
OTU_443	k__Bacteria	p__Firmicutes	c__Clostridia	o__Clostridiales	f__Ruminococcaceae	Others	Others	0	0	0	0	3	0	0	2	0	0	0	0	0	0	1	6	0	0	0	0	0	0	0	0	3	0	0	0	4	0	1	0	4	1	6	6	2	0	0	0
OTU_444	k__Bacteria	p__Firmicutes	c__Clostridia	o__Clostridiales	Others	Others	Others	9	0	0	2	0	0	0	0	0	0	0	5	0	2	0	2	0	0	0	0	0	0	0	0	3	0	0	0	0	0	0	2	2	0	0	0	0	1	0	0
OTU_445	k__Bacteria	p__Firmicutes	c__Erysipelotrichia	o__Erysipelotrichales	f__Erysipelotrichaceae	Others	Others	3	0	3	2	26	8	0	3	0	0	0	2	8	0	0	30	1	0	0	1	0	0	24	0	8	0	0	0	0	0	0	77	39	2	13	5	1	1	1	0
OTU_446	k__Bacteria	p__Proteobacteria	c__Alphaproteobacteria	o__Rhodobacterales	f__Rhodobacteraceae	g__Marivita	s__	0	0	0	0	0	0	0	0	0	0	3	0	0	0	1	0	0	0	0	0	0	0	0	0	0	0	0	0	0	0	0	0	0	0	0	0	0	0	0	0
OTU_447	k__Bacteria	p__Firmicutes	c__Clostridia	o__Clostridiales	f__Lachnospiraceae	Others	Others	4	3	0	9	0	0	0	0	0	0	3	7	5	1	4	5	0	1	3	0	0	1	2	0	0	0	0	6	0	7	1	7	0	0	1	1	1	3	0	6
OTU_448	k__Bacteria	p__Melainabacteria	c__	o__	f__	g__	s__	7	0	14	5	1	2	0	51	0	7	0	0	0	0	0	0	0	0	18	0	0	0	1	0	0	0	0	0	0	14	4	76	0	5	0	0	0	0	0	0
OTU_449	k__Bacteria	p__Firmicutes	c__Clostridia	o__Clostridiales	f__Ruminococcaceae	Others	Others	40	4	0	0	23	4	0	29	5	8	88	2	419	12	0	45	1	13	20	12	0	0	0	0	1	23	3	4	0	4	7	30	10	6	3	1	0	18	55	0
OTU_450	k__Bacteria	p__Firmicutes	c__Clostridia	o__Clostridiales	f__Ruminococcaceae	Others	Others	4	4	0	0	0	0	4	0	0	0	0	3	2	0	1	1	0	0	0	5	0	0	0	0	6	0	0	0	0	0	0	0	0	0	4	4	1	0	4	0
OTU_451	k__Bacteria	p__Bacteroidetes	c__Bacteroidia	o__Bacteroidales	f__Muribaculaceae	g__	s__	0	0	0	0	0	0	0	0	0	0	0	0	0	0	0	0	1	0	0	0	0	0	0	0	0	0	0	0	0	0	0	0	0	0	0	0	0	0	0	0
OTU_452	k__Bacteria	p__Bacteroidetes	c__Bacteroidia	o__Bacteroidales	f__Rikenellaceae	g__Alistipes	s__Alistipes_indistinctus	10	2	5	3	2	0	0	2	0	0	2	0	3	0	0	1	0	0	15	14	2	0	1	1	0	3	2	1	2	0	0	0	1	2	2	0	8	7	12	0
OTU_453	k__Bacteria	p__Firmicutes	c__Clostridia	o__Clostridiales	f__Christensenellaceae	g__	s__	0	0	0	0	1	0	3	0	0	0	0	0	0	0	0	0	1	0	8	0	0	1	5	0	0	0	0	0	0	0	0	0	0	0	0	0	0	1	0	0
OTU_454	k__Bacteria	p__Tenericutes	c__Mollicutes	o__	f__	g__	s__	0	0	0	0	0	0	0	0	0	0	0	0	2	0	0	0	0	0	4	0	0	0	0	0	0	1	0	0	4	0	0	0	0	0	0	0	0	0	1	0
OTU_455	k__Bacteria	p__Firmicutes	c__Clostridia	o__Clostridiales	f__Ruminococcaceae	Others	Others	0	0	0	0	0	3	0	0	1	0	0	6	7	2	1	2	0	3	8	0	1	0	1	3	2	2	2	3	6	7	0	8	6	0	3	4	2	0	0	4
OTU_456	k__Bacteria	p__Firmicutes	c__Clostridia	o__Clostridiales	f__Lachnospiraceae	Others	Others	0	0	0	0	0	0	0	0	0	0	56	0	0	0	0	0	0	0	0	0	0	0	0	0	301	0	0	0	1	0	0	0	0	0	0	0	0	0	0	0
OTU_457	k__Bacteria	p__Firmicutes	c__Bacilli	o__Lactobacillales	f__Carnobacteriaceae	g__Atopostipes	s__	0	0	0	0	0	0	0	0	1	7	0	0	0	0	0	0	0	0	0	0	0	0	0	0	11	0	0	0	0	0	0	0	0	0	0	0	0	0	0	0
OTU_458	k__Bacteria	p__Proteobacteria	c__Gammaproteobacteria	o__unidentified_Gammaproteobacteria	f__Burkholderiaceae	Others	Others	0	1	2	1	0	0	0	0	0	1	4	5	2	4	2	0	0	0	0	0	1	115	0	1	3	0	17	5	8	0	0	10	4	0	0	14	0	1	11	2
OTU_459	k__Bacteria	p__Firmicutes	c__Clostridia	o__Clostridiales	f__Lachnospiraceae	Others	Others	0	0	1	0	0	0	0	0	0	0	10	3	2	6	0	0	1	0	0	0	1	0	0	3	0	0	0	1	3	0	0	0	0	0	0	0	0	0	0	0
OTU_460	k__Bacteria	p__Proteobacteria	c__Gammaproteobacteria	o__Pseudomonadales	f__Moraxellaceae	g__Acinetobacter	s__Acinetobacter_nosocomialis	0	1	0	0	0	0	0	0	0	0	0	5	0	0	1	0	0	0	0	1	3	0	1	0	3	0	3	2	2	0	1	11	0	0	1	1	0	0	6	2
OTU_461	k__Bacteria	Others	Others	Others	Others	Others	Others	7	0	0	0	0	0	0	0	0	0	2	0	0	1	0	1	0	0	0	0	0	0	0	0	8	0	0	0	5	0	0	1	0	0	2	4	0	0	0	3
OTU_462	k__Bacteria	p__Proteobacteria	c__Gammaproteobacteria	o__unidentified_Gammaproteobacteria	f__Burkholderiaceae	g__Sutterella	s__	0	0	0	0	0	0	0	0	0	0	0	0	0	0	0	0	0	0	0	0	0	0	0	0	0	0	0	0	432	0	0	0	0	0	0	0	0	0	0	0
OTU_463	k__Bacteria	p__Firmicutes	c__Clostridia	o__Clostridiales	f__Ruminococcaceae	g__unidentified_Ruminococcaceae	s__Clostridiales_bacterium_canine_oral_taxon_123	1	0	0	8	3	0	5	0	2	2	0	0	70	4	14	0	0	3	0	0	1	1	1	0	17	0	0	6	1	0	0	0	0	0	3	0	0	1	0	5
OTU_464	k__Bacteria	p__Bacteroidetes	c__Bacteroidia	o__Bacteroidales	f__Muribaculaceae	g__	s__	0	0	0	0	0	0	0	15	0	0	0	0	0	0	0	0	0	0	0	0	3	0	0	0	0	0	0	0	0	0	0	0	0	0	0	0	0	0	0	0
OTU_465	k__Bacteria	p__Firmicutes	c__Clostridia	o__Clostridiales	Others	Others	Others	0	0	0	0	0	0	0	0	0	0	0	2	0	0	0	0	1	0	2	0	0	3	1	0	0	0	2	3	6	2	0	1	0	0	0	2	0	2	0	0
OTU_466	k__Bacteria	p__Bacteroidetes	c__Bacteroidia	o__Bacteroidales	f__Prevotellaceae	g__	s__	0	0	0	0	0	0	0	0	0	0	0	0	0	0	0	0	0	0	0	0	0	0	0	0	0	0	0	0	113	0	0	2	0	0	0	0	0	0	0	0
OTU_467	k__Bacteria	p__Firmicutes	c__Clostridia	o__Clostridiales	f__Ruminococcaceae	Others	Others	0	0	0	0	0	0	0	0	0	0	0	0	0	0	0	0	1	0	0	0	0	0	0	0	0	0	0	0	0	0	0	0	0	0	0	0	0	0	0	0
OTU_468	k__Bacteria	p__Firmicutes	c__Clostridia	o__Clostridiales	f__unidentified_Clostridiales	g__unidentified_Clostridiales	Others	0	0	0	0	0	0	0	7	0	0	0	0	0	0	0	0	0	0	0	0	0	0	0	0	0	4	0	0	0	0	1	0	0	0	0	0	3	0	0	0
OTU_469	k__Bacteria	p__Firmicutes	c__Clostridia	o__Clostridiales	Others	Others	Others	0	0	0	0	0	0	0	0	0	0	0	0	0	0	0	0	0	0	0	0	0	0	0	0	0	0	0	0	0	0	0	0	0	0	0	0	0	2	0	0
OTU_470	k__Bacteria	p__Firmicutes	c__Clostridia	o__Clostridiales	f__Ruminococcaceae	g__Intestinimonas	Others	0	0	3	0	0	0	5	0	0	0	0	3	0	3	0	0	2	0	5	0	3	0	0	5	1	0	5	0	0	0	0	0	4	1	5	1	2	1	0	4
OTU_471	k__Bacteria	p__Firmicutes	c__Clostridia	o__Clostridiales	f__Ruminococcaceae	g__unidentified_Ruminococcaceae	s__Ruminococcus_champanellensis	0	0	0	4	0	0	0	0	0	0	0	0	0	0	0	3	3	0	0	0	0	0	68	0	0	0	0	0	2	0	0	0	0	0	0	0	0	0	0	0
OTU_472	k__Bacteria	p__Firmicutes	c__Clostridia	o__Clostridiales	f__Christensenellaceae	g__	s__	0	0	0	0	0	0	2	0	0	0	21	0	0	0	0	0	0	0	0	0	0	0	4	0	0	0	0	0	4	0	0	0	0	0	0	0	0	14	0	0
OTU_473	k__Bacteria	p__Firmicutes	c__Clostridia	o__Clostridiales	f__Lachnospiraceae	Others	Others	0	0	0	0	4	0	6	0	0	0	0	0	0	0	18	0	4	4	0	0	0	0	0	1	0	0	1	0	2	0	0	0	0	5	0	0	0	8	0	1
OTU_474	k__Bacteria	p__Bacteroidetes	c__Bacteroidia	o__Bacteroidales	f__Prevotellaceae	Others	Others	0	0	0	0	0	0	0	31	0	0	0	0	1	0	0	0	3	0	0	0	0	0	0	0	0	4	0	2	0	0	0	0	0	0	0	0	0	0	0	0
OTU_475	k__Bacteria	p__Firmicutes	c__Erysipelotrichia	o__Erysipelotrichales	f__Erysipelotrichaceae	g__Holdemanella	s__	0	0	0	0	0	0	0	13	0	0	0	0	0	0	0	3	0	0	3	1	0	0	10	0	0	0	0	2	43	0	0	0	0	0	0	0	0	0	0	0
OTU_476	k__Bacteria	p__Firmicutes	Others	Others	Others	Others	Others	0	0	0	0	0	0	0	0	0	0	0	4	0	0	0	0	0	0	2	0	0	0	0	0	0	0	0	0	0	0	0	0	0	0	0	0	0	3	0	0
OTU_477	k__Bacteria	p__Proteobacteria	c__Gammaproteobacteria	o__Xanthomonadales	f__Xanthomonadaceae	g__Stenotrophomonas	Others	0	0	0	0	0	0	0	3	0	0	0	0	0	0	0	0	0	0	0	0	0	0	0	0	0	0	0	0	1	0	0	0	0	0	0	0	0	0	0	0
OTU_478	k__Bacteria	p__Firmicutes	c__Clostridia	o__Clostridiales	f__Lachnospiraceae	Others	Others	0	0	0	0	2	0	3	2	0	0	1	4	18	6	69	224	12	13	1	0	2	0	0	3	2	0	0	3	16	0	0	9	0	3	3	0	0	18	2	49
OTU_479	k__Bacteria	p__Firmicutes	c__Clostridia	o__Clostridiales	f__Defluviitaleaceae	g__	s__	0	0	0	0	0	0	1	0	0	1	32	0	0	0	0	0	0	0	1	0	0	0	0	0	0	0	0	0	0	0	0	0	3	0	10	0	0	1	0	2
OTU_480	k__Bacteria	p__Proteobacteria	c__Alphaproteobacteria	o__unidentified_Alphaproteobacteria	f__Acetobacteraceae	Others	Others	0	0	0	0	0	0	0	0	0	0	0	0	0	1	0	0	0	0	0	0	0	0	2	0	0	0	0	0	0	0	0	0	0	0	0	0	0	0	0	0
OTU_481	k__Bacteria	p__Firmicutes	c__Bacilli	o__Bacillales	f__Staphylococcaceae	g__Staphylococcus	Others	0	7	2	0	0	0	0	4	0	0	1	4	0	0	0	0	0	0	0	0	0	4	0	0	0	0	1	0	1	0	3	1	0	0	0	0	0	0	5	0
OTU_482	k__Bacteria	p__Bacteroidetes	c__Bacteroidia	o__Bacteroidales	f__Muribaculaceae	g__	s__	0	3	0	0	0	0	0	20	0	0	0	0	0	0	0	0	0	0	0	0	1	0	0	0	0	1	0	0	0	0	0	0	0	0	0	0	0	0	0	0
OTU_483	k__Bacteria	p__Bacteroidetes	c__Bacteroidia	o__Bacteroidales	f__Bacteroidaceae	g__Bacteroides	s__Bacteroides_thetaiotaomicron	11	6	4	5	0	0	14	3	0	0	6	0	0	0	6	6	9	0	2	7	7	2	2	1	17	4	0	0	10	1	0	2	5	2	15	3	2	7	11	2
OTU_484	k__Bacteria	p__Firmicutes	c__Clostridia	o__Clostridiales	f__Lachnospiraceae	g__Blautia	Others	0	0	0	0	0	0	0	35	0	0	0	2	2	0	0	0	0	0	0	0	1	0	1	0	0	0	0	0	5	0	0	0	0	0	0	0	0	0	0	0
OTU_485	k__Bacteria	p__Firmicutes	Others	Others	Others	Others	Others	0	0	0	0	0	202	0	0	0	0	0	0	0	0	0	0	0	0	0	0	0	0	0	0	0	0	0	0	0	0	0	0	0	2	0	0	0	0	0	0
OTU_486	k__Bacteria	p__Firmicutes	c__Clostridia	o__Clostridiales	f__Lachnospiraceae	Others	Others	0	8	111	0	0	0	0	0	37	0	0	0	4	0	0	0	1	0	3	0	0	0	5	0	0	28	0	3	8	0	5	3	0	0	0	0	0	0	0	0
OTU_487	k__Bacteria	p__Firmicutes	c__Clostridia	o__Clostridiales	f__Lachnospiraceae	Others	Others	32	9	0	27	0	7	3	2	0	7	4	6	10	5	9	12	10	0	6	18	0	0	7	13	4	2	0	25	8	3	4	27	11	4	20	16	0	3	14	7
OTU_488	k__Bacteria	p__Firmicutes	c__Clostridia	o__Clostridiales	f__Lachnospiraceae	g__unidentified_Lachnospiraceae	Others	0	6	0	0	1	0	2	0	0	0	3	0	1	1	2	0	0	0	1	0	0	0	0	0	0	3	0	0	2	0	0	4	0	4	2	0	3	0	0	0
OTU_489	k__Bacteria	p__Firmicutes	c__Clostridia	o__Clostridiales	f__Lachnospiraceae	g__Roseburia	Others	0	0	0	0	0	0	0	0	0	0	0	0	0	0	0	0	2	0	0	0	0	0	0	0	0	0	0	0	0	0	0	0	0	0	0	0	0	0	0	0
OTU_490	k__Bacteria	p__Bacteroidetes	c__Bacteroidia	o__Bacteroidales	f__Rikenellaceae	g__Alistipes	Others	0	0	0	0	0	0	0	0	0	0	0	0	2	0	0	0	3	0	0	2	0	7	0	1	0	0	0	0	14	0	0	0	0	0	0	0	4	1	1	0
OTU_491	k__Bacteria	p__Firmicutes	c__Clostridia	o__Clostridiales	f__Ruminococcaceae	Others	Others	0	0	0	0	1	0	0	1	0	0	3	0	3	0	0	1	0	0	3	0	0	0	0	0	16	0	0	0	0	0	0	0	0	3	2	0	0	0	0	0
OTU_492	k__Bacteria	p__Tenericutes	c__Mollicutes	o__	f__	g__	s__	0	1	0	0	0	0	0	0	1	0	0	0	0	0	0	0	0	0	0	0	0	0	0	0	0	4	0	0	0	0	0	4	0	0	0	0	0	0	0	0
OTU_494	k__Bacteria	p__Firmicutes	c__Clostridia	o__Clostridiales	f__Lachnospiraceae	Others	Others	0	0	0	0	0	0	0	0	0	0	0	0	0	0	0	0	0	2	0	0	0	0	0	0	11	0	0	0	3	0	0	0	0	0	0	0	0	0	0	0
OTU_496	k__Bacteria	p__Firmicutes	c__Clostridia	o__Clostridiales	Others	Others	Others	0	0	0	0	0	0	0	0	0	0	0	0	0	0	0	0	1	0	0	0	0	0	0	0	3	0	0	0	2	0	0	0	0	0	0	0	0	0	0	0
OTU_497	k__Bacteria	p__Bacteroidetes	c__Bacteroidia	o__Bacteroidales	f__Rikenellaceae	g__	s__	0	0	0	0	0	0	0	0	0	0	0	0	0	0	0	0	2	0	0	0	0	0	0	0	0	0	0	0	79	0	0	0	0	0	0	2	0	0	0	0
OTU_498	k__Bacteria	p__Firmicutes	c__Clostridia	o__Clostridiales	f__Eubacteriaceae	g__Anaerofustis	Others	0	4	1	0	2	1	4	2	0	2	2	0	2	3	3	3	6	0	5	2	2	5	7	0	2	0	0	2	4	4	1	4	1	0	4	5	0	0	0	5
OTU_499	k__Bacteria	p__Firmicutes	c__Bacilli	o__Bacillales	f__unidentified_Bacillales	g__Gemella	s__	0	3	0	0	0	0	0	1	0	0	0	0	0	0	0	0	0	0	0	0	0	0	8	0	0	0	7	2	0	0	0	2	0	0	0	0	0	0	1	12
OTU_500	k__Bacteria	p__Firmicutes	c__Bacilli	o__Lactobacillales	f__Lactobacillaceae	g__Lactobacillus	Others	0	5	0	0	0	3	0	1	0	0	0	0	0	0	0	0	0	0	0	0	2	0	0	0	0	0	83	0	0	0	0	0	3	0	0	0	2	0	114	0
OTU_501	k__Bacteria	p__Firmicutes	c__Clostridia	o__Clostridiales	f__Ruminococcaceae	g__unidentified_Ruminococcaceae	Others	2	1	3	0	3	0	3	6	0	0	1	3	3	0	0	2	0	0	0	0	2	2	1	0	0	0	0	0	2	0	0	0	0	5	8	4	1	0	3	0
OTU_502	k__Bacteria	p__Firmicutes	c__Clostridia	o__Clostridiales	f__Lachnospiraceae	Others	Others	5	0	1	0	0	0	0	2	0	0	0	28	6	0	14	1	0	0	0	1	0	0	1	0	2	0	0	3	6	1	0	0	3	3	6	3	5	0	3	5
OTU_503	k__Bacteria	p__Tenericutes	c__Mollicutes	o__	f__	g__	s__	0	2	0	0	0	0	0	0	2	0	0	0	1	0	0	0	0	0	0	0	0	0	22	0	0	0	5	0	68	0	0	0	0	0	1	0	0	4	0	0
OTU_504	k__Bacteria	Others	Others	Others	Others	Others	Others	0	0	0	0	0	0	0	0	0	0	0	0	0	0	0	0	0	0	0	4	0	0	0	0	0	0	0	0	0	0	0	0	0	0	0	0	0	0	0	0
OTU_505	k__Bacteria	p__Proteobacteria	c__Gammaproteobacteria	o__Pasteurellales	f__Pasteurellaceae	Others	Others	0	0	18	4	1	0	0	5	0	0	0	0	1	0	0	0	0	1	3	0	0	0	1	0	2	1	8	1	0	0	0	0	0	0	0	0	0	0	0	0
OTU_506	k__Bacteria	p__Tenericutes	c__Mollicutes	o__	f__	g__	s__	0	0	0	0	0	0	0	0	0	0	0	0	0	0	0	0	0	0	0	1	0	0	0	0	0	0	0	0	0	0	0	2	0	0	0	0	0	0	0	0
OTU_507	k__Bacteria	p__Firmicutes	c__Clostridia	o__Clostridiales	f__unidentified_Clostridiales	g__unidentified_Clostridiales	Others	0	0	0	0	1	2	0	0	0	0	6	0	0	1	0	0	0	0	0	1	0	0	0	3	0	0	0	0	2	0	0	0	0	0	0	0	0	0	0	0
OTU_508	k__Bacteria	Others	Others	Others	Others	Others	Others	0	0	0	0	0	0	3	0	0	0	0	0	0	0	2	1	0	0	0	0	0	0	0	0	0	0	0	0	0	0	0	0	0	0	0	0	0	1	0	0
OTU_509	k__Bacteria	p__Tenericutes	c__Mollicutes	o__	f__	g__	s__	0	0	0	2	0	0	1	0	0	0	0	0	0	0	9	14	0	0	0	0	14	0	0	0	0	0	0	280	0	0	0	0	0	0	0	0	0	0	0	0
OTU_510	k__Bacteria	p__Firmicutes	c__Clostridia	o__Clostridiales	f__Lachnospiraceae	Others	Others	2	0	0	1	0	0	0	1	0	0	8	3	113	0	0	53	0	0	0	0	0	0	4	1	1	0	2	6	0	0	0	5	5	0	0	34	0	0	0	44
OTU_511	k__Bacteria	p__Proteobacteria	c__Gammaproteobacteria	o__Pseudomonadales	f__Moraxellaceae	g__Perlucidibaca	s__	0	5	0	0	0	0	0	0	0	0	0	0	0	0	0	0	0	0	3	0	0	0	0	0	0	0	0	2	1	0	0	0	0	2	0	0	0	0	0	0
OTU_513	k__Bacteria	p__Firmicutes	c__Clostridia	o__Clostridiales	f__Lachnospiraceae	g__Roseburia	s__Eubacterium_sp_14-2	0	5	0	0	6	3	3	2	3	0	16	6	123	12	4	0	0	17	2	1	3	8	4	27	0	3	49	8	0	799	1	3	27	43	0	0	0	4	3	9
OTU_514	k__Bacteria	p__Firmicutes	c__Clostridia	o__Clostridiales	f__Peptostreptococcaceae	g__Paeniclostridium	s__	0	0	0	0	0	0	0	0	0	0	0	0	0	0	0	0	0	0	0	0	0	0	3	0	0	0	0	0	0	0	0	0	0	0	0	0	0	0	0	0
OTU_515	k__Bacteria	p__Bacteroidetes	c__Bacteroidia	o__Bacteroidales	Others	Others	Others	0	0	0	0	0	0	0	0	3	0	0	0	0	0	0	0	0	0	0	0	0	0	0	0	0	0	0	0	0	0	0	0	0	0	0	0	0	0	0	0
OTU_516	k__Bacteria	p__Firmicutes	c__Bacilli	o__Lactobacillales	f__Lactobacillaceae	g__Lactobacillus	s__Lactobacillus_equigenerosi	0	0	0	0	0	0	0	0	0	0	0	0	0	0	0	0	0	0	0	0	0	0	0	0	0	0	302	0	0	1	0	0	0	0	0	0	0	0	0	0
OTU_517	k__Bacteria	p__Bacteroidetes	c__Bacteroidia	o__Bacteroidales	f__Prevotellaceae	g__unidentified_Prevotellaceae	s__Massiliprevotella_massiliensis	0	0	0	0	0	0	0	0	0	0	0	0	0	0	0	0	0	0	0	0	0	0	2	0	0	0	0	0	0	0	0	0	0	0	0	0	0	0	0	0
OTU_518	k__Bacteria	p__Firmicutes	c__Clostridia	o__Clostridiales	f__unidentified_Clostridiales	Others	Others	8	0	1	7	0	0	0	2	0	0	4	0	4	7	8	5	0	0	7	0	0	0	0	2	2	0	0	11	0	0	0	4	5	0	0	0	9	0	0	0
OTU_519	k__Bacteria	p__Firmicutes	Others	Others	Others	Others	Others	0	0	0	0	0	0	0	0	0	0	0	0	0	0	0	0	0	0	0	0	0	0	0	0	0	0	0	0	1	0	0	0	0	0	0	0	11	0	0	0
OTU_520	k__Bacteria	p__Firmicutes	c__Clostridia	o__Clostridiales	f__Lachnospiraceae	Others	Others	0	0	1	0	0	0	0	0	0	0	0	0	3	1	1	0	0	0	1	0	0	4	0	0	0	2	0	0	3	0	0	0	0	0	0	0	0	1	2	1
OTU_521	k__Bacteria	p__Firmicutes	c__Clostridia	o__Clostridiales	f__Lachnospiraceae	Others	Others	0	2	0	0	2	0	0	0	0	0	0	0	3	0	7	4	0	0	0	0	0	0	0	0	0	2	0	0	0	2	0	4	0	0	2	4	0	1	0	2
OTU_522	k__Bacteria	p__Firmicutes	c__Clostridia	o__Clostridiales	f__Christensenellaceae	g__	s__	0	0	0	0	0	0	4	4	0	0	12	0	0	0	0	0	4	0	6	0	0	8	7	0	0	0	0	0	12	0	0	0	0	0	0	2	0	1	0	0
OTU_523	k__Bacteria	p__Oxyphotobacteria	c__unidentified_Oxyphotobacteria	o__unidentified_Oxyphotobacteria	f__unidentified_Oxyphotobacteria	g__unidentified_Oxyphotobacteria	Others	0	8	3	0	1	0	2	4	2	1	0	57	0	0	0	0	0	0	0	0	0	0	0	0	0	0	0	1	0	0	0	1	2	0	0	1	0	0	5	4
OTU_524	k__Bacteria	p__Bacteroidetes	c__Bacteroidia	o__Bacteroidales	f__unidentified_Bacteroidales	g__Proteiniphilum	Others	0	0	0	0	0	66	0	0	0	0	0	0	0	0	0	0	0	0	0	0	0	0	0	0	0	0	0	0	0	0	0	0	0	0	0	0	0	0	0	0
OTU_525	k__Bacteria	p__Firmicutes	c__Clostridia	o__Clostridiales	f__Lachnospiraceae	Others	Others	0	13	1	4	0	2	2	0	0	0	5	0	9	0	11	13	10	0	0	1	0	0	1	3	4	2	0	13	1	1	0	0	1	5	12	1	0	0	3	3
OTU_526	k__Bacteria	p__Bacteroidetes	c__Bacteroidia	o__Bacteroidales	f__Muribaculaceae	g__	s__	0	0	2	0	0	0	5	1	0	0	0	0	0	0	1	3	19	0	0	0	4	0	0	0	2	0	0	0	1	0	0	0	0	0	14	7	0	0	0	1
OTU_527	k__Bacteria	p__Proteobacteria	c__Gammaproteobacteria	o__unidentified_Gammaproteobacteria	f__Burkholderiaceae	g__Parasutterella	s__	0	0	0	0	0	0	0	112	0	0	0	0	0	0	0	0	0	0	2	0	0	0	1	0	0	0	0	0	11	0	0	0	0	0	0	0	0	0	0	0
OTU_528	k__Bacteria	p__Synergistetes	c__Synergistia	o__Synergistales	f__Synergistaceae	g__Lactivibrio	s__	0	0	0	0	0	119	0	0	0	0	0	0	0	0	0	0	0	0	0	0	0	0	0	0	0	0	0	0	0	0	0	0	0	0	0	0	0	0	0	0
OTU_529	k__Bacteria	p__Firmicutes	c__Clostridia	o__Clostridiales	f__Ruminococcaceae	Others	Others	0	0	1	0	0	0	0	0	0	0	0	1	0	0	3	0	1	0	0	0	0	0	0	0	0	0	0	0	0	0	0	0	42	0	0	0	0	0	0	0
OTU_530	k__Bacteria	p__Firmicutes	c__Clostridia	o__Clostridiales	f__Lachnospiraceae	Others	Others	0	0	0	0	0	0	0	0	0	1	8	3	13	0	0	6	0	0	0	0	2	0	1	0	0	7	0	4	0	0	0	3	1	4	0	0	0	0	0	4
OTU_531	k__Bacteria	p__Firmicutes	c__Clostridia	o__Clostridiales	f__Ruminococcaceae	Others	Others	26	9	11	15	4	7	34	25	10	8	40	51	30	23	48	15	17	21	37	10	10	7	10	15	20	34	23	6	98	58	69	66	76	20	82	55	74	23	11	41
OTU_532	k__Bacteria	p__Firmicutes	c__Clostridia	o__Clostridiales	f__unidentified_Clostridiales	Others	Others	0	0	1	0	0	0	0	0	0	0	0	0	0	0	0	0	0	0	0	0	0	0	0	0	0	0	0	0	0	0	0	0	0	0	0	0	0	0	0	0
OTU_533	k__Bacteria	p__Tenericutes	c__Mollicutes	o__	f__	g__	s__	0	0	0	0	0	3	4	0	0	0	0	0	0	5	0	0	0	0	0	0	0	1	0	0	0	0	0	0	2	0	3	0	0	0	0	0	0	0	0	2
OTU_534	k__Bacteria	p__Firmicutes	c__Clostridia	o__Clostridiales	f__Lachnospiraceae	g__unidentified_Lachnospiraceae	s__[Eubacterium]_hallii	1	0	0	0	0	0	0	40	0	0	0	0	0	0	0	0	0	0	0	1	0	0	2	0	0	0	0	0	2	0	0	0	33	0	0	0	0	0	1	0
OTU_535	k__Bacteria	p__Firmicutes	c__Clostridia	o__Clostridiales	f__unidentified_Clostridiales	g__unidentified_Clostridiales	Others	0	0	0	0	0	0	0	0	0	0	0	0	0	0	0	0	0	0	0	0	0	0	0	0	0	0	1	0	0	0	0	0	0	0	0	0	0	0	391	0
OTU_536	k__Bacteria	p__Firmicutes	c__Clostridia	o__Clostridiales	f__Lachnospiraceae	Others	Others	2	4	0	2	0	0	0	0	0	3	0	0	0	2	10	0	2	0	0	0	3	0	0	2	0	0	0	55	3	0	3	4	4	4	0	0	9	13	0	0
OTU_538	k__Bacteria	p__Firmicutes	c__Clostridia	o__Clostridiales	f__Lachnospiraceae	Others	Others	0	0	1	0	0	0	0	0	0	0	1	0	2	0	1	0	0	0	0	0	0	0	0	0	0	0	0	0	3	1	2	3	0	0	3	11	3	0	0	16
OTU_539	k__Bacteria	p__Bacteroidetes	c__Bacteroidia	o__Bacteroidales	f__Muribaculaceae	g__	s__	0	3	0	0	0	0	0	0	0	0	0	0	4	0	0	0	101	0	0	0	0	0	0	0	0	0	0	2	0	0	0	0	0	0	0	0	0	0	0	5
OTU_540	k__Bacteria	p__Firmicutes	c__Clostridia	o__Clostridiales	f__Lachnospiraceae	Others	Others	0	0	0	0	0	0	0	1	0	3	0	0	0	6	0	2	0	0	0	0	3	0	0	0	1	0	0	0	2	0	0	0	0	0	0	0	0	0	0	0
OTU_541	k__Bacteria	p__Firmicutes	c__Clostridia	o__Clostridiales	f__Ruminococcaceae	g__unidentified_Ruminococcaceae	Others	0	5	0	0	4	3	1	3	0	0	0	0	15	23	3	2	13	0	4	0	0	0	5	2	0	1	1	0	3	67	3	4	0	5	0	1	10	1	3	0
OTU_542	k__Bacteria	p__Firmicutes	c__Clostridia	o__Clostridiales	f__Lachnospiraceae	Others	Others	2	0	0	2	0	0	3	0	0	3	0	2	14	0	11	39	4	0	0	0	1	0	2	1	0	3	0	2	2	0	5	0	3	0	0	2	0	0	2	5
OTU_543	k__Bacteria	p__Firmicutes	c__Clostridia	o__Clostridiales	f__Ruminococcaceae	g__Ruminiclostridium	s__	3	0	0	0	0	0	1	0	0	0	0	0	7	0	14	4	0	0	0	0	0	0	0	0	1	2	0	0	0	0	0	3	0	0	2	15	0	0	0	0
OTU_544	k__Bacteria	p__Proteobacteria	c__Alphaproteobacteria	o__Rhizobiales	f__Rhizobiaceae	g__Ochrobactrum	s__Ochrobactrum_pseudogrignonense	0	0	0	3	0	0	1	0	0	0	0	0	0	0	0	0	0	0	0	0	0	0	0	0	0	0	0	0	0	0	0	0	2	0	0	0	0	0	0	0
OTU_545	k__Bacteria	p__Firmicutes	c__Clostridia	o__Clostridiales	f__Lachnospiraceae	g__Anaerostipes	Others	0	0	0	0	0	0	0	51	0	0	0	0	0	0	0	0	0	0	0	0	0	0	1	3	0	0	0	0	1	0	0	0	0	0	3	0	0	0	0	0
OTU_546	k__Bacteria	p__Bacteroidetes	c__Bacteroidia	o__Bacteroidales	f__	g__	s__	0	2	0	0	0	100	0	0	0	0	0	0	0	0	0	0	0	0	0	0	0	0	0	0	0	0	0	0	0	0	0	0	0	0	0	0	0	0	0	0
OTU_547	k__Bacteria	p__Tenericutes	c__Mollicutes	o__	f__	g__	s__	0	0	3	0	0	0	3	0	0	0	114	1	12	0	0	2	0	12	0	0	0	0	5	0	0	0	0	3	0	0	0	0	0	0	0	11	0	0	0	46
OTU_548	k__Bacteria	p__Firmicutes	c__Clostridia	o__Clostridiales	f__Ruminococcaceae	Others	Others	0	3	22	4	51	0	28	1	0	0	1	0	2	1	24	0	13	2	7	0	2	13	0	6	1	0	0	0	0	0	0	0	0	0	7	6	0	126	0	7
OTU_549	k__Bacteria	p__Bacteroidetes	c__Bacteroidia	o__Bacteroidales	f__Muribaculaceae	g__	s__	0	0	0	0	1	3	0	104	0	0	0	0	0	0	0	0	0	0	0	0	0	0	0	0	0	0	0	0	0	0	0	0	0	0	0	0	0	0	0	0
OTU_550	k__Bacteria	p__Chloroflexi	c__Anaerolineae	o__Anaerolineales	f__Anaerolineaceae	Others	Others	0	0	0	0	0	116	0	0	0	0	0	0	0	0	0	0	0	0	0	0	0	0	0	0	0	0	0	0	0	0	0	0	0	0	0	0	0	0	0	0
OTU_551	k__Bacteria	p__Actinobacteria	c__unidentified_Actinobacteria	o__Micrococcales	f__Micrococcaceae	g__Yaniella	s__	0	0	0	0	3	0	0	0	0	2	0	0	0	0	2	0	0	0	0	0	0	0	0	0	11	0	0	0	1	0	2	0	0	0	0	0	0	0	0	0
OTU_552	k__Archaea	p__Crenarchaeota	c__unidentified_Crenarchaeota	o__unidentified_Crenarchaeota	f__unidentified_Crenarchaeota	g__unidentified_Crenarchaeota	s__archaeon_enrichment_culture_clone_C1-29C-A	0	0	0	0	0	118	0	0	0	0	0	0	0	0	0	0	0	0	0	0	0	0	0	0	0	0	0	0	0	0	0	0	0	0	0	0	0	0	0	0
OTU_553	k__Bacteria	p__Firmicutes	c__Clostridia	o__Clostridiales	f__Ruminococcaceae	Others	Others	4	11	17	1	0	0	13	4	35	0	4	0	79	152	8	303	34	19	31	0	6	34	5	33	7	28	19	78	282	0	0	0	0	0	49	5	3	10	0	7
OTU_554	k__Bacteria	p__Bacteroidetes	c__Bacteroidia	o__Bacteroidales	f__Bacteroidaceae	g__Bacteroides	s__Bacteroides_plebeius	0	3	0	1	0	3	5	19	0	0	0	0	3	0	0	0	0	0	0	0	0	0	2	0	0	4	1	0	0	0	0	0	0	0	0	0	0	0	2	0
OTU_555	k__Bacteria	p__Firmicutes	c__Clostridia	o__Clostridiales	f__Lachnospiraceae	Others	Others	2	3	3	4	0	0	13	7	0	0	0	0	23	7	0	1	2	2	0	5	0	12	1	7	0	0	0	3	1	0	0	31	86	0	3	0	0	0	3	1
OTU_556	k__Bacteria	p__Firmicutes	c__Clostridia	o__Clostridiales	f__Lachnospiraceae	g__unidentified_Lachnospiraceae	s__Clostridium_sp_ASF356	0	0	0	0	0	0	3	1	0	0	0	1	0	0	0	0	0	0	4	0	0	4	0	0	6	1	0	3	2	0	4	9	3	0	0	4	0	0	0	0
OTU_557	k__Bacteria	p__Firmicutes	c__Clostridia	o__Clostridiales	f__Ruminococcaceae	g__unidentified_Ruminococcaceae	Others	0	0	0	0	1	0	0	0	0	0	7	0	0	0	0	0	0	0	5	0	0	0	7	0	0	0	0	0	0	0	0	0	7	0	0	0	0	0	0	0
OTU_558	k__Bacteria	p__Firmicutes	c__Clostridia	o__Clostridiales	f__Lachnospiraceae	g__Lachnoclostridium	s__Dorea_sp_5-2	18	53	0	6	28	7	3	17	4	12	347	72	84	82	6	35	4	17	11	4	2	5	12	16	6	106	0	24	12	19	45	41	1	7	17	8	3	14	10	0
OTU_559	k__Bacteria	p__Firmicutes	c__Clostridia	o__Clostridiales	f__Ruminococcaceae	g__Harryflintia	s__	4	0	0	0	0	0	2	0	0	0	0	0	0	0	0	2	0	0	0	0	0	1	0	0	1	1	0	0	0	0	0	0	0	0	3	9	0	0	0	0
OTU_561	k__Bacteria	p__Firmicutes	c__Clostridia	o__Clostridiales	f__Lachnospiraceae	Others	Others	0	1	0	7	0	2	7	0	0	1	0	6	1	2	3	3	12	0	0	0	0	3	3	0	2	0	0	8	4	1	0	0	3	1	5	10	1	0	0	2
OTU_562	k__Bacteria	p__Firmicutes	c__Clostridia	o__Clostridiales	f__Lachnospiraceae	g__Agathobacter	s__	0	14	0	2	2	1	5	11	0	0	0	0	1	0	6	1	3	0	0	0	0	1	2	0	4	0	0	4	70	0	0	0	8	0	2	0	0	0	1	59
OTU_563	k__Bacteria	p__Melainabacteria	c__	o__	f__	g__	s__	10	0	0	0	0	0	4	9	0	1	0	0	4	1	0	0	3	0	0	1	0	0	0	2	6	2	0	0	0	5	0	4	0	0	1	3	1	0	4	0
OTU_565	k__Bacteria	p__Bacteroidetes	c__Bacteroidia	o__Bacteroidales	f__Prevotellaceae	Others	Others	0	0	0	0	0	0	0	0	0	0	0	0	0	0	0	0	0	0	0	0	0	0	0	0	0	0	0	0	0	0	0	0	0	0	0	2	0	0	0	0
OTU_566	k__Bacteria	p__Firmicutes	c__Clostridia	o__Clostridiales	f__Ruminococcaceae	g__Anaerotruncus	s__	7	0	2	0	1	1	4	0	1	0	0	2	3	3	2	4	0	0	0	4	3	2	0	2	0	0	0	0	0	0	0	0	3	3	0	3	2	0	0	0
OTU_567	k__Bacteria	p__Firmicutes	c__Clostridia	o__Clostridiales	f__Lachnospiraceae	g__Blautia	s__Blautia_obeum	0	7	0	0	0	0	0	49	0	0	0	0	3	0	0	0	0	0	0	2	0	0	3	0	0	3	2	0	7	0	0	0	2	0	0	0	0	2	0	0
OTU_568	k__Bacteria	p__Firmicutes	c__Clostridia	o__Clostridiales	Others	Others	Others	0	0	0	0	0	0	0	5	0	0	0	0	0	0	0	0	0	0	3	0	1	0	0	0	3	0	0	0	3	0	0	3	4	2	0	0	2	3	0	0
OTU_569	k__Bacteria	p__Firmicutes	c__Clostridia	o__Clostridiales	f__Lachnospiraceae	Others	Others	0	0	0	0	0	0	0	0	0	0	0	0	0	0	0	0	0	0	0	0	0	2	0	0	0	0	0	10	0	0	0	0	0	0	0	0	0	0	0	0
OTU_570	k__Bacteria	p__Tenericutes	c__Mollicutes	o__	f__	g__	s__	0	0	0	0	0	0	0	0	1	0	0	0	0	0	11	64	0	0	0	0	1	0	0	0	0	3	0	6	0	0	0	0	1	0	0	0	0	0	0	0
OTU_571	k__Bacteria	p__Firmicutes	c__Clostridia	o__Clostridiales	f__Lachnospiraceae	g__Roseburia	Others	0	0	0	0	0	0	2	0	1	0	3	0	0	0	0	0	0	0	0	0	0	5	0	1	0	4	0	0	0	0	0	0	2	0	0	0	0	10	0	2
OTU_572	k__Bacteria	p__Tenericutes	c__Mollicutes	o__	f__	g__	s__	0	0	0	0	0	0	0	0	0	0	0	0	0	0	0	0	0	0	0	0	0	0	0	0	0	0	0	0	0	0	4	0	0	0	0	0	0	0	0	0
OTU_573	k__Bacteria	p__Firmicutes	c__Clostridia	o__Clostridiales	f__Ruminococcaceae	g__unidentified_Ruminococcaceae	s__Ruminococcus_bromii	0	2	0	0	0	0	1	65	0	0	0	0	1	0	0	0	7	0	0	0	0	0	0	0	0	0	1	0	1	0	0	0	1	0	0	0	0	0	0	0
OTU_574	k__Bacteria	p__Firmicutes	c__Clostridia	o__Clostridiales	f__Lachnospiraceae	g__Acetatifactor	s__	0	0	0	0	0	0	4	0	0	2	2	0	4	1	3	0	4	0	0	0	0	0	0	3	0	0	0	4	6	0	0	0	0	0	2	4	0	0	0	0
OTU_576	k__Bacteria	p__Bacteroidetes	c__Bacteroidia	o__Bacteroidales	f__Muribaculaceae	g__	s__	32	24	18	5	24	15	24	53	1	3	9	3	53	2	63	172	32	32	68	26	168	8	50	32	116	3	23	76	68	3	4	24	81	25	18	97	21	3	125	2
OTU_577	k__Bacteria	p__Firmicutes	c__Clostridia	o__Clostridiales	f__Lachnospiraceae	Others	Others	0	0	0	0	0	0	0	0	19	1	0	7	0	0	0	0	0	0	0	0	0	16	0	11	2	0	0	0	48	0	0	0	0	0	0	0	0	0	0	0
OTU_578	k__Bacteria	p__Firmicutes	c__Clostridia	o__Clostridiales	f__Ruminococcaceae	g__Harryflintia	Others	0	0	4	0	0	0	0	0	0	0	0	0	0	0	0	0	0	0	0	0	0	1	0	0	1	4	0	0	0	0	0	0	0	4	2	2	0	0	0	0
OTU_579	k__Bacteria	p__Spirochaetes	c__Spirochaetia	o__Spirochaetales	f__Spirochaetaceae	g__unidentified_Spirochaetaceae	s__Spirochetales_bacterium_enrichment_culture_clone_D2CL_Bac_16S_Clone1	0	0	0	0	0	56	0	0	0	0	0	0	0	0	0	0	0	0	0	0	0	0	0	0	0	0	0	0	0	0	0	0	0	0	0	0	0	0	0	0
OTU_580	k__Bacteria	p__Bacteroidetes	c__Bacteroidia	Others	Others	Others	Others	0	0	0	0	0	50	0	0	0	0	0	0	0	0	0	0	0	0	0	0	0	0	0	0	0	0	0	0	0	0	0	0	0	0	0	0	0	0	0	0
OTU_581	k__Bacteria	p__Tenericutes	c__Mollicutes	o__	f__	g__	s__	0	0	0	0	0	0	0	0	11	0	20	0	0	0	0	11	0	0	0	0	0	0	0	0	0	4	4	0	10	0	0	0	0	0	3	2	0	0	0	0
OTU_582	k__Bacteria	p__Firmicutes	c__Erysipelotrichia	o__Erysipelotrichales	f__Erysipelotrichaceae	Others	Others	0	1	0	0	0	0	0	1	0	0	4	0	0	0	5	0	4	0	1	0	2	1	9	0	0	0	0	0	0	0	0	1	7	0	0	0	0	0	0	2
OTU_583	k__Bacteria	p__Firmicutes	c__Clostridia	o__Clostridiales	f__Ruminococcaceae	Others	Others	1	0	0	2	0	0	3	0	0	1	0	0	0	0	0	2	0	0	0	0	0	0	0	0	0	0	0	0	3	0	0	0	0	0	0	0	0	0	0	1
OTU_584	k__Bacteria	p__Firmicutes	c__Clostridia	o__Clostridiales	f__Ruminococcaceae	Others	Others	13	4	6	5	9	1	0	2	0	1	0	3	33	7	4	8	0	10	2	22	0	2	0	15	16	2	2	0	5	7	2	5	4	18	16	35	8	4	11	0
OTU_585	k__Bacteria	Others	Others	Others	Others	Others	Others	0	0	0	0	0	0	0	0	0	0	0	0	0	0	0	0	0	0	0	0	0	0	0	0	0	0	0	0	0	0	0	0	0	0	0	0	0	0	0	0
OTU_586	k__Bacteria	p__Firmicutes	c__Clostridia	o__Clostridiales	f__Ruminococcaceae	g__unidentified_Ruminococcaceae	s__Marseillibacter_massiliensis	0	0	0	0	0	0	0	0	0	0	0	0	0	0	0	0	0	0	0	0	0	0	0	0	0	0	0	0	41	0	0	0	0	0	0	0	0	0	0	0
OTU_588	k__Bacteria	p__Firmicutes	c__Bacilli	o__Bacillales	f__Planococcaceae	g__Sporosarcina	s__Sporosarcina_pasteurii	0	0	0	0	0	0	0	0	0	0	0	0	0	4	0	0	0	0	0	0	0	0	0	0	0	0	0	0	0	0	0	0	0	0	0	0	0	0	0	0
OTU_589	k__Bacteria	p__Tenericutes	c__Mollicutes	o__	f__	g__	s__	0	2	0	0	0	0	0	0	0	0	6	0	4	4	0	0	1	0	0	3	0	2	2	19	0	0	0	2	2	0	0	0	10	0	0	0	0	13	3	0
OTU_590	k__Bacteria	p__Firmicutes	c__Clostridia	o__Clostridiales	f__Lachnospiraceae	Others	Others	0	0	0	0	0	0	0	4	0	0	1	0	5	3	0	2	3	4	0	0	0	0	2	0	0	0	0	0	0	0	0	0	0	0	162	0	0	0	0	0
OTU_591	k__Bacteria	p__Firmicutes	c__Clostridia	o__Clostridiales	f__Lachnospiraceae	Others	Others	0	0	0	0	0	0	0	0	0	0	0	0	0	0	0	0	0	0	0	0	0	0	0	0	0	0	0	0	0	0	0	0	0	0	3	1	0	0	0	0
OTU_592	k__Bacteria	p__Firmicutes	c__Clostridia	o__Clostridiales	f__Lachnospiraceae	Others	Others	2	9	9	3	0	0	2	0	0	0	0	0	0	3	0	0	0	0	0	0	0	0	0	1	0	0	0	0	0	0	0	0	0	0	36	0	0	0	0	0
OTU_593	k__Bacteria	p__Firmicutes	c__Erysipelotrichia	o__Erysipelotrichales	f__Erysipelotrichaceae	g__Catenibacterium	s__	0	2	0	0	0	0	0	4	0	0	0	0	0	0	0	0	0	0	0	0	0	2	2	0	0	0	0	0	69	0	0	0	0	0	0	0	0	0	0	0
OTU_594	k__Bacteria	p__Firmicutes	c__Clostridia	o__Clostridiales	f__Ruminococcaceae	Others	Others	5	2	5	3	6	1	1	0	0	1	1	0	0	2	14	1	4	1	2	0	1	0	0	0	10	0	0	0	7	0	3	0	0	1	6	5	6	0	0	0
OTU_595	k__Bacteria	p__Firmicutes	c__Clostridia	o__Clostridiales	f__Ruminococcaceae	Others	Others	0	0	0	0	0	0	0	0	0	0	0	0	0	0	0	0	0	0	4	0	0	0	0	0	2	0	0	0	3	28	0	2	0	0	0	3	0	6	2	0
OTU_596	k__Bacteria	p__Firmicutes	c__Clostridia	o__Clostridiales	f__Lachnospiraceae	g__unidentified_Lachnospiraceae	Others	9	4	3	8	39	2	177	16	8	15	0	4	2	548	257	0	1	0	0	68	167	0	0	1030	3	2	6	158	4	4	3	0	104	54	228	1	0	53	103	1
OTU_597	k__Bacteria	p__Firmicutes	c__Clostridia	o__Clostridiales	f__Lachnospiraceae	Others	Others	2	0	0	0	0	0	0	0	0	0	5	4	0	2	0	3	0	0	2	0	0	0	0	0	0	0	1	0	0	0	0	0	0	1	0	1	0	1	0	0
OTU_598	k__Bacteria	p__Bacteroidetes	c__Bacteroidia	o__Bacteroidales	f__Muribaculaceae	g__Muribaculum	s__	166	32	36	42	5	12	78	47	2	3	29	6	18	5	59	53	8	54	78	21	7	0	105	6	114	44	16	2	19	1	2	25	206	50	114	137	61	6	91	13
OTU_599	k__Bacteria	p__Firmicutes	c__Clostridia	o__Clostridiales	Others	Others	Others	0	0	0	0	0	0	2	0	0	1	0	0	0	0	8	3	4	1	0	0	0	0	3	0	3	1	0	2	3	2	1	1	2	3	5	5	4	4	3	10
OTU_600	k__Bacteria	p__Firmicutes	c__Bacilli	o__Lactobacillales	f__Carnobacteriaceae	g__Atopostipes	s__	0	0	0	0	0	0	0	0	0	0	0	0	0	0	0	0	0	0	0	0	0	0	0	0	2	0	0	0	0	0	0	0	0	0	0	0	0	0	0	0
OTU_601	k__Bacteria	p__Firmicutes	c__Clostridia	o__Clostridiales	Others	Others	Others	0	0	0	0	0	0	0	0	0	0	0	1	0	0	0	0	0	0	0	0	0	0	0	0	0	0	0	0	0	0	0	0	0	0	0	0	3	0	0	0
OTU_602	k__Bacteria	p__Bacteroidetes	c__Bacteroidia	o__Bacteroidales	f__Marinifilaceae	g__Odoribacter	Others	0	0	0	0	0	0	0	0	0	0	0	0	0	0	0	1	0	0	0	0	2	0	1	0	0	0	0	0	8	0	0	0	0	0	0	0	0	0	0	0
OTU_603	k__Bacteria	p__Firmicutes	c__Clostridia	o__Clostridiales	f__Lachnospiraceae	Others	Others	1	0	3	1	0	3	0	0	0	0	1	1	2	5	2	1	1	3	0	0	1	0	0	0	7	1	0	27	25	13	4	33	0	0	3	5	18	1	0	20
OTU_604	k__Bacteria	p__Tenericutes	c__Mollicutes	o__Anaeroplasmatales	f__Anaeroplasmataceae	g__Anaeroplasma	s__	0	0	0	0	0	0	0	0	0	11	1	50	0	0	0	0	0	0	5	0	0	0	3	0	0	0	0	0	0	0	0	0	11	0	0	0	3	16	0	0
OTU_605	k__Bacteria	p__Bacteroidetes	c__Bacteroidia	o__Bacteroidales	f__Muribaculaceae	g__	s__	0	0	0	0	0	0	0	56	0	0	0	0	0	0	0	0	0	0	0	0	0	0	0	1	0	0	0	0	0	0	0	0	0	0	0	0	0	0	0	0
OTU_606	k__Bacteria	p__Firmicutes	c__Clostridia	o__Clostridiales	f__Ruminococcaceae	Others	Others	5	1	0	0	0	0	0	0	0	0	0	1	4	1	0	0	0	0	0	0	0	0	0	0	0	0	0	1	0	0	1	0	0	0	0	3	0	1	1	0
OTU_607	k__Bacteria	p__Firmicutes	c__Clostridia	o__Clostridiales	Others	Others	Others	0	0	0	0	0	0	0	0	0	0	0	0	0	0	0	5	0	0	2	0	0	0	0	0	3	0	0	0	6	0	0	0	0	0	0	0	0	0	0	0
OTU_608	k__Bacteria	p__unidentified_Bacteria	c__unidentified_Bacteria	o__Campylobacterales	f__	g__	s__	0	0	0	0	0	122	0	0	0	0	0	0	0	0	0	0	0	0	0	0	0	0	0	0	0	0	0	0	0	0	0	0	0	0	0	0	0	0	0	0
OTU_609	k__Bacteria	p__Tenericutes	c__Mollicutes	o__	f__	g__	s__	0	0	0	0	0	0	1	0	0	0	0	0	0	19	0	0	0	1	0	0	0	1	0	0	0	0	0	0	0	0	0	0	0	0	3	0	0	3	0	0
OTU_611	k__Bacteria	p__Proteobacteria	c__Gammaproteobacteria	o__Pseudomonadales	f__Moraxellaceae	g__Psychrobacter	s__Psychrobacter_cryohalolentis	0	3	0	0	0	0	0	0	0	0	0	0	0	0	0	0	0	0	0	0	0	0	0	0	0	0	0	0	0	0	0	0	40	0	0	0	0	0	0	0
OTU_612	k__Bacteria	p__Firmicutes	c__Clostridia	o__Clostridiales	Others	Others	Others	1	0	0	0	0	0	0	0	0	0	0	0	0	6	1	6	0	0	0	0	0	0	0	0	0	0	0	0	2	2	0	0	0	0	3	0	0	0	0	0
OTU_613	k__Bacteria	p__Bacteroidetes	c__Bacteroidia	o__Sphingobacteriales	f__Lentimicrobiaceae	g__unidentified_Lentimicrobiaceae	s__bacterium_enrichment_culture_clone_ecb21	0	0	0	0	0	57	0	0	0	0	0	0	0	0	0	0	0	0	0	0	0	0	0	0	0	0	0	0	0	0	0	0	0	0	0	0	0	0	0	0
OTU_614	k__Bacteria	p__Tenericutes	c__Mollicutes	o__	f__	g__	s__	0	0	0	0	3	0	0	2	0	0	2	0	0	2	0	22	5	0	11	0	0	1	5	0	0	2	0	2	29	2	0	0	1	0	0	0	3	2	0	2
OTU_615	k__Bacteria	p__Bacteroidetes	c__Bacteroidia	o__Bacteroidales	f__	g__	s__	0	0	0	0	0	493	0	4	0	0	0	0	0	0	0	0	0	0	0	0	0	0	0	0	0	0	0	0	0	0	0	0	0	1	0	0	0	0	0	0
OTU_616	k__Bacteria	Others	Others	Others	Others	Others	Others	13	0	1	0	0	0	0	2	0	0	1	0	0	0	0	0	0	0	0	0	0	0	1	0	0	0	5	0	0	0	0	0	0	0	0	0	0	0	0	0
OTU_617	k__Bacteria	p__Firmicutes	c__Clostridia	o__Clostridiales	f__Lachnospiraceae	Others	Others	0	4	2	3	3	0	4	1	0	3	5	0	0	6	0	0	4	17	0	6	0	6	0	7	0	0	0	0	0	0	0	0	0	1	0	0	0	0	4	0
OTU_618	k__Bacteria	p__Bacteroidetes	c__Bacteroidia	o__Bacteroidales	f__Prolixibacteraceae	g__	s__	0	0	0	0	0	40	0	0	0	0	0	0	0	0	0	0	0	0	0	0	0	0	0	0	0	0	0	0	0	0	0	0	0	0	0	0	0	0	0	0
OTU_619	k__Archaea	p__Euryarchaeota	c__Methanomicrobia	o__Methanosarcinales	f__Methanosaetaceae	g__Methanosaeta	s__Methanosaeta_harundinacea	0	0	0	0	0	149	0	0	0	0	0	0	0	0	0	0	0	0	0	0	0	2	0	0	0	0	1	0	0	0	0	0	0	0	0	0	0	0	0	0
OTU_620	k__Bacteria	p__Firmicutes	c__Erysipelotrichia	o__Erysipelotrichales	f__Erysipelotrichaceae	g__Dubosiella	s__	6	7	4	8	40	43	38	35	342	118	235	119	0	22	56	4	21	2	58	89	34	16	49	62	0	252	30	0	0	4	260	35	41	70	25	102	13	17	63	6
OTU_622	k__Bacteria	p__Bacteroidetes	c__Bacteroidia	o__Cytophagales	f__Microscillaceae	g__	s__	0	73	0	0	0	0	0	0	0	0	0	0	0	0	0	0	0	0	0	0	0	0	0	0	0	0	0	0	0	0	0	0	3	0	0	0	0	0	0	0
OTU_623	k__Bacteria	p__Firmicutes	c__Clostridia	o__Clostridiales	f__Ruminococcaceae	g__unidentified_Ruminococcaceae	s__Ruminococcus_bicirculans	0	0	0	2	0	0	0	0	0	0	0	1	0	0	0	0	0	0	0	0	0	0	0	0	0	0	0	0	0	0	0	0	0	0	0	0	0	0	0	3
OTU_624	k__Bacteria	p__Firmicutes	c__Clostridia	o__Clostridiales	f__unidentified_Clostridiales	g__unidentified_Clostridiales	Others	0	0	0	0	0	0	3	2	0	0	0	0	1	0	0	0	0	0	0	0	1	0	0	0	0	0	1	0	3	2	0	0	0	1	2	1	2	0	2	4
OTU_625	k__Bacteria	p__Firmicutes	c__Erysipelotrichia	o__Erysipelotrichales	f__Erysipelotrichaceae	g__Dubosiella	s__	303	85	10	9	1156	556	33	613	6	209	161	0	4	69	0	526	22	49	618	22	4	20	15	157	2	19	0	3	6	4	4	2	0	218	0	9	18	163	25	8
OTU_626	k__Bacteria	p__Proteobacteria	c__Deltaproteobacteria	o__Syntrophobacterales	f__Syntrophobacteraceae	Others	Others	0	0	0	0	0	89	0	0	0	0	0	0	0	0	0	0	0	0	0	0	0	0	0	0	0	0	0	0	0	0	0	0	0	0	0	0	0	0	0	0
OTU_627	k__Bacteria	p__Firmicutes	c__Clostridia	o__Clostridiales	f__Lachnospiraceae	g__unidentified_Lachnospiraceae	s__Coprococcus_comes	0	3	0	0	0	0	0	6	0	0	0	0	0	0	0	0	0	0	0	0	0	0	0	0	0	0	0	0	9	0	0	0	0	0	0	0	0	0	0	0
OTU_628	k__Bacteria	p__Firmicutes	c__Clostridia	o__Clostridiales	f__Ruminococcaceae	Others	Others	0	0	0	0	0	0	0	0	0	0	0	0	0	0	0	0	0	0	0	0	0	0	0	0	0	0	0	0	0	0	0	0	0	0	8	0	0	0	0	0
OTU_629	k__Bacteria	p__Firmicutes	c__Clostridia	o__Clostridiales	f__Lachnospiraceae	Others	Others	14	12	0	12	2	0	0	4	0	0	0	0	0	17	87	1	9	0	0	8	3	0	0	3	0	9	1	3	0	2	7	44	62	0	1	1	0	0	10	0
OTU_630	k__Bacteria	p__Firmicutes	c__Clostridia	o__Clostridiales	f__Lachnospiraceae	Others	Others	0	0	0	0	0	0	0	8	1	0	0	0	0	0	0	0	0	0	0	0	0	0	0	0	0	0	0	0	7	0	0	0	0	0	0	0	0	0	0	0
OTU_631	k__Bacteria	p__unidentified_Bacteria	c__unidentified_Bacteria	o__Campylobacterales	f__unidentified_Campylobacterales	g__Sulfurovum	Others	0	0	0	0	0	0	0	0	0	0	0	0	4	0	0	0	0	0	0	0	0	0	0	0	0	0	0	0	0	0	0	0	0	0	0	0	0	0	0	0
OTU_632	k__Bacteria	p__Firmicutes	c__Clostridia	o__Clostridiales	f__Ruminococcaceae	Others	Others	0	0	0	0	0	0	5	0	0	0	0	0	0	0	0	0	0	0	0	0	0	0	3	0	0	0	0	0	1	0	0	0	0	0	0	2	1	0	0	0
OTU_633	k__Bacteria	p__Bacteroidetes	c__Bacteroidia	o__Bacteroidales	Others	Others	Others	0	0	0	0	0	0	0	3	0	0	0	0	0	0	0	0	32	0	0	0	0	0	0	0	0	0	0	0	0	0	0	0	0	0	0	0	0	0	0	0
OTU_634	k__Bacteria	p__Firmicutes	c__Erysipelotrichia	o__Erysipelotrichales	f__Erysipelotrichaceae	Others	Others	0	0	0	0	0	0	1	0	0	0	0	0	0	0	28	0	0	0	3	0	0	3	3	0	0	0	0	0	0	0	0	0	0	0	0	0	0	6	0	0
OTU_635	k__Bacteria	p__Bacteroidetes	c__Bacteroidia	o__Bacteroidales	f__Rikenellaceae	g__Alistipes	Others	0	2	0	0	0	0	1	12	0	0	0	1	0	0	2	0	0	1	0	0	0	0	0	0	2	0	0	0	7	0	0	0	1	0	2	1	0	0	0	0
OTU_636	k__Bacteria	p__Firmicutes	c__Clostridia	o__Clostridiales	f__Lachnospiraceae	Others	Others	0	0	0	0	0	0	0	0	0	0	0	0	0	0	0	0	0	0	0	0	0	0	0	0	0	0	0	0	0	0	0	0	0	0	0	0	0	0	0	0
OTU_637	k__Bacteria	p__Bacteroidetes	c__Bacteroidia	o__Bacteroidales	f__Bacteroidaceae	g__Bacteroides	Others	3	0	0	0	0	0	0	0	0	0	0	1	0	0	0	0	0	0	9	0	0	0	0	0	1	0	0	0	4	0	0	0	0	2	0	0	2	1	1	0
OTU_638	k__Bacteria	p__Firmicutes	c__Clostridia	o__Clostridiales	f__Lachnospiraceae	Others	Others	0	0	0	0	0	0	4	0	0	0	4	0	2	0	0	4	0	0	0	0	0	0	1	0	0	0	0	0	0	0	0	0	0	0	0	0	0	7	0	0
OTU_639	k__Bacteria	p__Bacteroidetes	c__Bacteroidia	o__Bacteroidales	f__Rikenellaceae	g__Alistipes	s__	0	0	0	0	0	0	0	0	0	0	0	1	0	0	0	0	0	0	0	0	0	0	0	0	0	0	0	0	0	0	3	0	0	0	0	0	0	0	0	0
OTU_640	k__Bacteria	p__Tenericutes	c__Mollicutes	o__	f__	g__	s__	0	1	5	0	1	0	8	8	2	1	21	0	7	73	1	13	35	10	97	0	37	0	58	54	40	11	5	68	51	52	0	1	0	1	0	7	0	6	3	26
OTU_641	k__Bacteria	p__Firmicutes	c__Bacilli	o__Lactobacillales	f__Streptococcaceae	g__Lactococcus	s__Lactococcus_piscium	0	2	0	0	0	1	0	0	0	0	2	0	0	0	0	0	0	0	0	0	22	0	3	0	1	0	0	0	0	0	0	0	3	0	0	0	0	0	0	2
OTU_642	k__Bacteria	p__Actinobacteria	c__unidentified_Actinobacteria	o__Micrococcales	f__Dermabacteraceae	g__Brachybacterium	Others	0	0	0	0	0	0	0	0	0	0	0	0	0	0	0	0	0	0	0	0	0	0	0	0	0	0	0	0	0	0	0	0	0	0	0	0	0	0	0	0
OTU_643	k__Bacteria	p__Bacteroidetes	c__Bacteroidia	o__Bacteroidales	f__Prevotellaceae	Others	Others	0	26	0	0	0	0	0	0	0	0	0	0	0	0	0	0	0	0	0	0	0	0	0	0	0	0	0	0	0	0	0	0	3	0	0	0	0	0	0	0
OTU_644	k__Bacteria	p__Proteobacteria	c__Alphaproteobacteria	o__Rhodobacterales	f__Rhodobacteraceae	g__Planktomarina	s__	0	0	0	0	0	1	0	0	0	0	0	0	0	0	0	0	0	0	0	0	0	0	0	0	0	0	0	0	0	0	0	0	0	0	0	0	0	0	0	0
OTU_645	k__Bacteria	p__Bacteroidetes	c__Bacteroidia	o__Bacteroidales	f__Rikenellaceae	g__Alistipes	s__	1	1	0	0	0	0	0	0	0	0	3	1	0	0	0	0	0	0	2	0	0	0	2	0	7	0	0	0	3	0	0	0	0	0	2	0	0	0	0	0
OTU_646	k__Bacteria	p__Fusobacteria	c__Fusobacteriia	o__Fusobacteriales	f__Fusobacteriaceae	g__Fusobacterium	s__Fusobacterium_periodonticum	0	0	10	2	0	0	0	3	0	0	0	0	0	0	0	0	0	0	2	0	0	0	3	0	0	0	0	1	0	0	1	0	0	0	0	0	0	0	0	3
OTU_647	k__Bacteria	p__Firmicutes	c__Clostridia	o__Clostridiales	f__Christensenellaceae	Others	Others	0	0	0	0	0	0	3	0	0	0	0	0	0	0	0	0	0	0	0	0	0	0	2	0	0	0	0	0	0	0	0	0	0	0	0	0	0	0	0	0
OTU_648	k__Bacteria	p__Firmicutes	c__Clostridia	o__Clostridiales	f__Lachnospiraceae	g__Lachnoclostridium	s__	2	1	0	6	0	0	7	3	0	0	0	0	2	0	4	0	0	0	0	0	0	2	5	3	0	0	0	0	7	0	0	0	6	0	9	0	0	1	0	2
OTU_649	k__Bacteria	p__Firmicutes	c__Clostridia	o__Clostridiales	f__unidentified_Clostridiales	Others	Others	0	0	0	1	0	0	0	0	0	0	0	0	0	0	0	0	0	0	0	0	0	0	5	0	0	0	0	0	0	0	0	2	0	0	0	2	0	0	0	0
OTU_650	k__Bacteria	p__Bacteroidetes	c__Bacteroidia	o__Bacteroidales	f__Muribaculaceae	g__	s__	0	0	0	0	0	0	0	0	0	0	0	0	1	0	2	0	39	0	0	0	0	0	2	0	0	0	0	0	0	0	0	0	0	0	0	0	0	0	0	0
OTU_651	k__Bacteria	p__Firmicutes	c__Negativicutes	o__Selenomonadales	f__Veillonellaceae	g__Megamonas	s__	0	0	0	0	0	0	5	0	2	0	0	0	0	0	0	0	0	0	0	0	0	0	0	0	0	0	0	0	42	1	0	0	0	0	0	0	0	0	1	0
OTU_652	k__Bacteria	p__Bacteroidetes	c__Bacteroidia	o__Bacteroidales	f__Muribaculaceae	g__	s__	103	42	8	8	0	3	9	8	0	3	3	3	4	0	7	13	6	13	83	14	20	2	12	9	109	1	1	6	25	0	0	0	20	2	29	71	64	5	17	12
OTU_653	k__Bacteria	p__Firmicutes	c__Clostridia	o__Clostridiales	f__Lachnospiraceae	g__unidentified_Lachnospiraceae	s__[Ruminococcus]_gnavus	0	2	0	2	0	3	0	0	2	1	3	3	0	0	0	0	0	0	0	0	0	2	2	0	0	0	8	1	0	0	1	0	0	0	0	0	0	0	6	0
OTU_654	k__Bacteria	p__Firmicutes	c__Clostridia	o__Clostridiales	Others	Others	Others	0	3	0	0	0	0	0	0	0	0	0	0	0	3	0	0	0	0	0	0	0	0	1	0	0	6	0	2	0	0	0	0	0	0	0	0	0	4	0	0
OTU_655	k__Bacteria	p__Firmicutes	c__Clostridia	o__Clostridiales	f__Lachnospiraceae	Others	Others	5	22	3	5	0	0	5	0	2	0	2	5	30	0	2	1282	5	0	0	71	0	38	3	0	4	1	6	3	7	0	0	0	3	0	2948	5	0	6	78	1091
OTU_656	k__Bacteria	p__Firmicutes	c__Clostridia	o__Clostridiales	f__Lachnospiraceae	Others	Others	0	0	0	3	0	0	0	13	0	0	0	0	0	0	0	26	0	0	0	3	0	0	0	0	0	0	0	0	0	0	0	0	0	0	0	0	2	3	11	14
OTU_658	k__Bacteria	Others	Others	Others	Others	Others	Others	0	0	0	0	0	0	0	0	0	0	0	0	0	0	0	0	0	0	0	0	0	3	0	0	0	0	0	0	0	0	0	0	0	0	0	0	0	0	0	0
OTU_659	k__Bacteria	p__Firmicutes	c__Clostridia	o__Clostridiales	f__Lachnospiraceae	g__unidentified_Lachnospiraceae	s__Clostridiales_bacterium_CIEAF_020	18	0	0	37	2	4	8	0	2	10	1	7	6	7	0	0	7	0	4	2	0	0	1	46	2	0	0	3	2	0	187	12	0	5	2	0	0	35	1	4
OTU_660	k__Bacteria	p__Firmicutes	c__Clostridia	o__Clostridiales	f__Ruminococcaceae	g__unidentified_Ruminococcaceae	Others	6	18	26	10	21	2	6	16	0	1	14	1	373	41	12	0	90	19	0	2	1	64	7	250	0	4	3	45	18	15	0	26	15	24	0	49	0	10	3	2
OTU_661	k__Bacteria	p__Firmicutes	c__Erysipelotrichia	o__Erysipelotrichales	f__Erysipelotrichaceae	g__Ileibacterium	s__Ileibacterium_valens	35	1470	21	23	3	136	0	4	254	135	1	0	2	14	0	0	8	732	105	362	34	11	0	136	0	5	380	0	0	3	87	0	0	83	0	0	826	23	408	0
OTU_662	k__Bacteria	p__Cloacimonetes	c__unidentified_Cloacimonetes	o__unidentified_Cloacimonetes	f__unidentified_Cloacimonetes	g__Candidatus_Cloacimonas	s__	0	0	0	0	0	47	0	0	0	0	0	0	0	0	0	0	0	0	0	0	0	0	0	0	0	0	0	0	0	0	0	0	0	0	0	0	0	0	0	0
OTU_663	k__Bacteria	p__Firmicutes	c__Clostridia	o__Clostridiales	f__Lachnospiraceae	g__Lachnospira	s__	0	0	0	0	0	0	0	5	0	0	0	0	0	0	0	0	0	0	0	0	2	0	0	0	0	0	0	0	59	0	0	0	0	0	0	0	0	0	0	0
OTU_664	k__Bacteria	p__Firmicutes	c__Clostridia	o__Clostridiales	f__Caldicoprobacteraceae	g__Caldicoprobacter	s__	0	0	0	0	0	65	0	2	0	0	0	0	0	0	0	0	0	0	0	0	0	0	0	0	0	0	0	0	0	0	0	0	0	0	0	0	0	0	0	0
OTU_665	k__Bacteria	p__Proteobacteria	c__Gammaproteobacteria	o__Pseudomonadales	f__Moraxellaceae	g__Acinetobacter	s__Acinetobacter_johnsonii	0	13	0	0	1	0	0	4	0	0	1	16	0	0	0	0	0	1	0	0	0	10	3	0	0	0	24	1	0	0	0	2	0	0	0	0	0	0	12	0
OTU_666	k__Bacteria	p__Proteobacteria	c__Gammaproteobacteria	o__unidentified_Gammaproteobacteria	f__Burkholderiaceae	g__Piscinibacter	Others	0	8	0	0	0	0	0	0	3	0	0	0	0	0	0	0	0	0	1	0	0	1	0	0	0	0	0	0	2	0	0	0	0	0	0	0	0	0	0	1
OTU_668	k__Bacteria	p__Firmicutes	c__Clostridia	o__Clostridiales	f__Ruminococcaceae	Others	Others	0	0	0	0	0	0	4	0	0	0	0	0	0	0	0	0	0	0	0	0	0	0	5	0	0	0	0	0	0	0	0	0	0	0	0	0	0	0	0	0
OTU_669	k__Bacteria	p__Firmicutes	c__Clostridia	o__Clostridiales	f__Lachnospiraceae	Others	Others	0	2	0	0	0	0	4	0	0	0	0	0	7	3	184	198	0	7	0	0	4	1	3	11	24	169	0	72	0	2	0	0	13	0	5	58	0	0	31	40
OTU_670	k__Bacteria	p__Proteobacteria	c__Gammaproteobacteria	o__unidentified_Gammaproteobacteria	f__Neisseriaceae	g__Neisseria	s__Neisseria_subflava	0	0	21	5	0	0	0	1	0	0	0	0	0	0	0	0	0	0	5	0	0	0	1	1	0	0	1	2	0	0	0	0	0	0	0	0	0	0	0	0
OTU_671	k__Bacteria	p__Bacteroidetes	c__Bacteroidia	o__Flavobacteriales	f__Flavobacteriaceae	g__Lutibacter	s__	0	0	0	0	0	0	0	0	0	0	0	0	0	0	0	0	0	0	0	0	0	0	0	0	0	0	0	0	0	0	0	0	45	0	0	0	0	0	0	0
OTU_672	k__Bacteria	p__Firmicutes	c__Clostridia	o__Clostridiales	f__Lachnospiraceae	g__Butyrivibrio	s__	0	0	0	0	0	0	0	0	0	0	0	0	0	0	0	0	2	0	0	0	0	0	0	0	0	0	0	0	0	0	0	0	0	0	0	0	0	0	0	0
OTU_673	k__Bacteria	p__Thermotogae	c__unidentified_Thermotogae	o__Kosmotogales	f__Kosmotogaceae	g__Mesotoga	s__	0	0	0	0	0	62	0	0	0	0	0	0	0	0	0	0	0	0	0	0	0	0	0	0	0	0	0	0	0	0	0	0	0	0	0	0	0	0	0	0
OTU_674	k__Bacteria	p__Tenericutes	c__Mollicutes	o__	f__	g__	s__	0	0	0	0	0	0	5	0	0	15	0	0	14	156	70	0	1	6	47	0	7	0	3	35	1	0	0	34	50	0	0	0	0	0	0	0	2	5	0	349
OTU_675	k__Bacteria	p__Firmicutes	c__Clostridia	o__Clostridiales	f__Lachnospiraceae	g__Marvinbryantia	Others	0	0	4	0	0	0	8	0	0	0	8	0	0	0	3	0	1	0	0	0	0	4	2	0	0	0	0	4	1	0	0	2	0	1	4	0	0	0	0	9
OTU_676	k__Bacteria	p__Firmicutes	c__Clostridia	o__Clostridiales	f__Ruminococcaceae	Others	Others	0	0	0	0	0	0	0	0	0	0	0	0	0	0	0	0	0	0	1	3	0	0	0	0	5	0	0	0	4	0	0	0	0	0	0	5	0	0	0	0
OTU_677	k__Bacteria	p__Bacteroidetes	c__Bacteroidia	o__Bacteroidales	f__	g__	s__	0	0	0	0	0	243	0	0	0	0	0	0	0	0	0	0	0	0	0	0	0	0	0	0	0	0	0	0	0	0	0	0	0	0	0	0	0	0	1	0
OTU_678	k__Bacteria	p__Proteobacteria	c__Gammaproteobacteria	o__unidentified_Gammaproteobacteria	f__Burkholderiaceae	Others	Others	0	0	0	0	0	0	0	0	0	0	0	0	0	0	0	0	0	0	0	0	0	0	0	0	0	0	0	0	0	0	0	0	0	0	0	0	0	0	0	0
OTU_679	k__Bacteria	p__Proteobacteria	c__Gammaproteobacteria	o__Aeromonadales	f__Succinivibrionaceae	g__Succinivibrio	s__	0	15	0	0	0	0	0	4	0	0	0	0	0	0	0	0	0	0	0	0	0	0	0	0	0	0	0	0	0	0	0	0	0	0	0	5	0	0	0	0
OTU_680	k__Bacteria	p__Firmicutes	c__Clostridia	o__Clostridiales	Others	Others	Others	41	2	8	16	2	20	11	33	1	2	8	0	31	78	33	9	5	2	3	8	2	6	1	9	8	2	0	0	135	0	0	8	2	5	0	0	5	7	10	169
OTU_682	k__Bacteria	p__Firmicutes	c__Clostridia	o__Clostridiales	f__Lachnospiraceae	g__Lachnospira	s__	0	0	0	0	0	1	0	3	0	0	0	0	0	0	0	0	0	0	0	0	0	0	0	0	0	0	0	0	25	0	0	0	0	0	0	0	0	0	0	0
OTU_683	k__Bacteria	p__Firmicutes	c__Clostridia	o__Clostridiales	Others	Others	Others	0	0	0	0	0	0	0	0	0	1	0	0	0	0	0	0	0	0	0	0	0	0	0	0	2	0	0	0	1	0	0	0	0	0	0	0	0	4	0	1
OTU_685	k__Bacteria	p__Gemmatimonadetes	c__unidentified_Gemmatimonadetes	o__Gemmatimonadales	f__Gemmatimonadaceae	g__unidentified_Gemmatimonadaceae	s__Gemmatimonadetes_bacterium_LP81	0	66	0	0	0	0	0	0	0	0	0	0	0	0	0	0	0	0	0	0	0	0	0	0	0	0	0	0	0	0	0	0	0	0	0	0	0	0	0	0
OTU_686	k__Bacteria	p__Bacteroidetes	c__Bacteroidia	o__Bacteroidales	f__Prevotellaceae	g__	s__	0	0	0	0	0	0	0	0	0	0	0	0	0	0	0	0	4	0	0	0	0	0	0	0	0	0	0	0	0	0	0	0	0	0	0	0	0	0	0	0
OTU_687	k__Bacteria	p__Actinobacteria	c__Coriobacteriia	o__Coriobacteriales	f__	g__	s__	0	0	0	0	0	0	0	0	0	0	0	0	0	0	0	0	0	0	0	0	0	0	0	0	0	0	0	0	0	0	0	0	5	0	0	0	0	0	0	0
OTU_688	k__Bacteria	p__Firmicutes	c__Clostridia	o__Clostridiales	f__Lachnospiraceae	Others	Others	4	0	0	2	5	4	0	2	0	3	1	89	6	4	5	3	5	0	2	0	0	2	2	0	0	4	8	29	120	78	5	6	5	3	0	204	87	2	1	12
OTU_689	k__Bacteria	p__Firmicutes	c__Erysipelotrichia	o__Erysipelotrichales	f__Erysipelotrichaceae	Others	Others	66	7	2	21	16	8	16	3	7	6	34	10	40	24	4	16	23	2	4	49	25	11	2	19	35	0	5	49	86	8	8	9	69	8	0	1	0	0	152	313
OTU_690	k__Bacteria	p__Firmicutes	c__Clostridia	o__Clostridiales	f__Ruminococcaceae	Others	Others	0	0	0	0	1	0	0	0	0	0	0	0	0	0	1	0	0	0	3	0	0	0	0	0	0	0	0	0	0	0	0	0	0	0	0	0	4	0	1	5
OTU_691	k__Bacteria	p__Bacteroidetes	c__Bacteroidia	o__Bacteroidales	f__Bacteroidaceae	g__Bacteroides	s__Bacteroides_coprocola	0	0	0	2	0	0	0	0	0	0	0	0	0	0	0	0	0	0	0	0	0	0	0	0	0	0	0	0	0	0	0	0	0	0	0	0	0	0	0	0
OTU_692	k__Bacteria	p__Proteobacteria	c__Alphaproteobacteria	o__Rhizobiales	f__Xanthobacteraceae	g__Bradyrhizobium	s__Bradyrhizobium_elkanii	2	1	1	0	0	0	0	0	0	0	0	3	0	0	4	0	0	0	0	0	0	7	0	0	0	2	0	0	5	0	0	2	1	0	0	5	1	1	0	0
OTU_693	k__Bacteria	p__Bacteroidetes	c__Bacteroidia	o__Bacteroidales	f__Marinifilaceae	g__Butyricimonas	s__	0	0	0	0	0	0	0	0	0	0	0	0	0	0	0	0	4	0	0	0	0	0	0	0	0	0	0	0	69	0	0	0	0	0	0	0	0	0	0	0
OTU_694	k__Bacteria	p__Firmicutes	c__Clostridia	o__Clostridiales	f__Lachnospiraceae	Others	Others	1	3	6	1	1	0	5	0	0	0	3	0	8	5	11	34	2	14	0	3	2	0	4	7	3	0	0	14	0	1	0	2	20	31	13	22	1	1	3	16
OTU_695	k__Bacteria	p__Firmicutes	c__Clostridia	o__Clostridiales	f__Ruminococcaceae	Others	Others	8	1	2	2	0	0	2	2	0	0	2	0	2	0	9	11	0	0	10	3	0	0	0	0	7	0	0	0	0	3	1	0	2	5	5	14	6	0	14	0
OTU_696	k__Bacteria	p__Firmicutes	c__Clostridia	o__Clostridiales	f__Lachnospiraceae	Others	Others	4	0	0	0	0	0	7	2	0	0	0	6	4	0	2	0	1	6	2	0	0	0	6	0	5	0	0	0	1	1	0	1	0	0	1	5	0	0	0	0
OTU_697	k__Bacteria	p__Firmicutes	c__Clostridia	o__Clostridiales	f__Lachnospiraceae	Others	Others	0	0	0	0	0	0	0	0	0	0	0	0	0	0	0	0	0	0	0	0	0	0	1	0	0	0	0	1	0	0	0	0	0	0	0	0	0	0	0	0
OTU_698	k__Bacteria	p__Proteobacteria	c__Gammaproteobacteria	o__Pseudomonadales	f__Pseudomonadaceae	g__Pseudomonas	Others	0	12	4	0	0	0	0	8	0	0	0	9	0	1	0	1	1	0	0	0	0	2	0	3	0	1	2	1	1	0	0	4	7	0	0	0	0	0	0	0
OTU_699	k__Bacteria	p__Proteobacteria	c__Gammaproteobacteria	o__Enterobacteriales	f__Enterobacteriaceae	Others	Others	0	2	0	0	0	0	0	40	0	2	0	2	0	3	0	0	0	0	0	0	0	0	0	0	0	4	48	0	0	0	0	0	0	0	0	0	0	0	2	0
OTU_700	k__Bacteria	p__Firmicutes	c__Clostridia	o__Clostridiales	f__Lachnospiraceae	Others	Others	0	5	0	0	0	0	0	7	0	0	6	1	12	0	0	0	0	6	0	0	0	0	2	1	0	0	0	5	5	0	0	0	0	1	0	0	0	0	0	0
OTU_701	k__Bacteria	p__Firmicutes	c__Clostridia	o__Clostridiales	Others	Others	Others	0	0	2	0	0	0	0	0	0	0	0	0	2	0	0	0	0	0	0	0	0	0	4	0	0	4	0	0	0	4	0	3	0	0	0	0	0	0	0	2
OTU_702	k__Bacteria	p__Bacteroidetes	c__Bacteroidia	o__Bacteroidales	f__Muribaculaceae	g__	s__	0	0	1	0	0	0	0	0	0	0	0	0	0	0	0	0	20	0	0	0	0	0	0	0	0	0	0	0	0	0	0	0	0	0	0	0	0	0	0	0
OTU_703	k__Bacteria	p__unidentified_Bacteria	c__unidentified_Bacteria	o__unidentified_Bacteria	f__unidentified_Bacteria	g__Aegiribacteria	Others	0	0	0	0	0	59	0	1	0	0	0	0	0	0	0	0	0	0	0	0	0	0	0	0	0	0	0	0	0	0	0	0	0	1	0	0	0	0	0	0
OTU_705	k__Bacteria	Others	Others	Others	Others	Others	Others	0	2	0	0	0	0	0	0	0	0	0	0	0	0	0	0	0	0	0	0	0	0	0	0	0	0	0	0	49	0	0	0	0	0	0	0	0	0	0	0
OTU_706	k__Bacteria	p__Firmicutes	c__Clostridia	o__Clostridiales	f__Lachnospiraceae	Others	Others	0	0	0	0	0	0	0	0	0	4	0	0	0	0	28	0	0	0	0	0	0	2	0	0	0	0	2	4	5	0	0	0	0	0	5	0	1	0	0	0
OTU_707	k__Bacteria	p__Firmicutes	c__Clostridia	o__Clostridiales	f__Lachnospiraceae	Others	Others	0	0	0	0	0	0	3	0	3	0	4	0	6	0	0	4	2	0	0	0	0	0	0	3	0	5	0	0	1	0	0	0	0	0	0	281	2	0	0	7
OTU_708	k__Bacteria	p__Actinobacteria	c__unidentified_Actinobacteria	o__Micrococcales	f__Micrococcaceae	g__Rothia	s__Rothia_mucilaginosa	0	0	1	0	0	0	0	0	0	0	0	0	0	0	0	0	0	0	1	0	0	0	0	0	0	0	19	0	0	0	0	0	0	2	0	0	0	0	7	0
OTU_709	k__Bacteria	p__Proteobacteria	c__Deltaproteobacteria	o__Desulfovibrionales	f__Desulfovibrionaceae	g__Desulfovibrio	Others	2	3	6	5	12	15	31	5	6	10	2	19	2	14	61	5	12	4	6	8	16	22	174	20	1	0	0	29	43	4	9	5	6	3	12	5	6	14	9	18
OTU_710	k__Bacteria	p__Firmicutes	c__Erysipelotrichia	o__Erysipelotrichales	f__Erysipelotrichaceae	g__Dubosiella	s__	0	6	1	0	17	26	8	14	173	69	83	19	3	8	5	0	2	2	32	44	4	2	6	19	0	123	8	0	0	0	129	18	7	36	1	7	5	5	37	0
OTU_711	k__Bacteria	p__Firmicutes	c__Clostridia	o__Clostridiales	f__Lachnospiraceae	g__Blautia	s__Ruminococcus_sp_5_1_39BFAA	0	0	1	3	0	0	0	113	0	0	0	0	0	0	0	0	0	0	0	0	0	0	16	0	0	0	0	2	14	0	0	0	26	0	1	0	0	0	2	0
OTU_712	k__Bacteria	p__Firmicutes	c__Clostridia	o__Clostridiales	f__Ruminococcaceae	Others	Others	0	0	0	0	0	0	0	0	0	0	0	0	0	0	1	0	0	2	0	0	0	0	0	0	1	0	0	0	2	0	0	0	0	0	0	4	0	0	0	0
OTU_714	k__Bacteria	Others	Others	Others	Others	Others	Others	0	0	1	0	1	2	0	0	0	0	0	0	13	0	0	0	0	0	0	0	1	0	0	1	0	0	0	0	0	0	0	0	0	0	1	4	2	0	0	0
OTU_716	k__Bacteria	p__Firmicutes	c__Clostridia	o__Clostridiales	f__Ruminococcaceae	g__unidentified_Ruminococcaceae	Others	0	0	0	0	0	0	0	0	0	16	10	0	0	2	0	9	3	3	0	8	0	0	0	0	212	0	0	0	0	0	0	0	0	0	13	0	0	4	14	0
OTU_717	k__Bacteria	p__Proteobacteria	c__Deltaproteobacteria	o__Desulfovibrionales	f__Desulfovibrionaceae	g__Desulfovibrio	Others	0	0	0	0	2	1	0	0	2	0	0	3	0	2	2	0	4	0	1	0	4	3	8	42	0	0	0	0	0	4	0	0	0	1	1	0	1	0	0	0
OTU_718	k__Bacteria	p__Firmicutes	c__Clostridia	o__Clostridiales	f__Ruminococcaceae	Others	Others	7	6	4	2	10	3	7	8	0	8	2	5	12	10	9	12	6	1	5	0	0	0	7	5	6	5	4	5	19	7	2	11	7	34	24	14	1	2	5	8
OTU_719	k__Bacteria	p__Oxyphotobacteria	c__unidentified_Oxyphotobacteria	o__Synechococcales	f__unidentified_Synechococcales	g__unidentified_Synechococcales	Others	0	0	0	0	0	0	0	0	0	0	0	0	0	0	0	0	0	0	0	0	0	0	0	0	0	0	0	0	0	0	0	0	0	0	0	0	0	0	0	0
OTU_721	k__Bacteria	p__Firmicutes	c__Clostridia	o__Clostridiales	f__Lachnospiraceae	Others	Others	0	0	0	0	0	0	0	3	0	0	2	0	0	0	1	0	7	3	0	0	0	0	0	10	0	0	0	0	0	0	0	0	0	0	13	0	0	0	9	0
OTU_722	k__Bacteria	p__Firmicutes	c__Clostridia	o__Clostridiales	f__Lachnospiraceae	Others	Others	2	1	0	0	3	4	2	1	0	0	2	1	0	0	0	0	0	0	0	0	0	0	0	3	0	0	0	0	4	0	0	0	0	0	1	0	0	0	0	0
OTU_723	k__Bacteria	p__Chloroflexi	c__Anaerolineae	o__Anaerolineales	f__Anaerolineaceae	g__	s__	0	0	0	0	3	36	0	0	0	0	0	0	0	0	0	0	0	0	0	0	0	0	0	0	0	0	0	0	0	0	0	0	0	0	0	0	0	0	0	0
OTU_725	k__Bacteria	p__Firmicutes	c__Bacilli	o__Lactobacillales	f__Leuconostocaceae	g__Weissella	s__Weissella_cibaria	0	5	2	0	0	0	0	0	0	0	0	0	2	0	0	0	0	0	0	0	2	0	0	0	0	2	0	3	0	0	0	0	0	0	0	0	0	0	0	0
OTU_726	k__Bacteria	p__Firmicutes	c__Clostridia	o__Clostridiales	f__Syntrophomonadaceae	g__Syntrophomonas	s__	0	0	0	0	0	33	0	0	0	0	0	0	0	0	0	0	0	0	0	0	0	0	0	0	0	0	0	0	0	0	0	0	0	0	0	0	0	0	0	0
OTU_727	k__Bacteria	p__Firmicutes	c__Clostridia	o__Clostridiales	f__Lachnospiraceae	Others	Others	0	0	0	0	0	0	1	0	0	0	0	0	0	0	0	0	0	0	0	0	0	0	0	0	0	0	0	0	0	0	0	0	0	0	0	0	0	0	0	0
OTU_728	k__Bacteria	p__Firmicutes	c__Clostridia	o__Clostridiales	f__Lachnospiraceae	Others	Others	0	0	0	0	0	0	0	0	0	0	0	0	0	0	0	0	0	0	0	0	0	0	0	0	0	0	0	0	8	0	0	0	0	0	0	0	0	0	0	0
OTU_729	k__Bacteria	p__Bacteroidetes	c__Bacteroidia	o__Bacteroidales	f__Bacteroidaceae	g__Bacteroides	s__Bacteroides_sartorii	1	0	0	0	0	0	0	0	0	0	0	0	0	0	5	0	1	0	0	0	4	0	0	0	5	0	0	0	0	0	0	0	0	0	0	0	0	2	0	0
OTU_730	k__Bacteria	p__Melainabacteria	c__	o__	f__	g__	s__	2	0	0	0	0	0	1	0	0	0	0	0	0	0	0	0	0	2	0	0	0	0	0	0	1	0	0	0	0	0	0	0	0	0	0	0	2	0	0	0
OTU_731	k__Bacteria	p__Firmicutes	c__Clostridia	o__Clostridiales	f__Lachnospiraceae	g__Lachnoclostridium	Others	7	5	2	10	0	0	39	3	0	2	30	0	1	6	2	32	19	2	7	45	0	0	0	27	0	0	0	91	11	0	0	0	0	11	17	1	0	0	33	0
OTU_732	k__Bacteria	p__unidentified_Bacteria	c__unidentified_Bacteria	o__unidentified_Bacteria	f__unidentified_Bacteria	g__unidentified_Bacteria	Others	0	0	0	0	0	62	0	0	0	0	0	0	0	0	0	0	0	0	0	0	0	0	0	0	0	0	0	0	0	0	0	0	0	0	0	0	0	0	0	0
OTU_733	k__Bacteria	p__Bacteroidetes	c__Bacteroidia	o__Bacteroidales	f__Bacteroidaceae	g__Bacteroides	Others	114	3	10	8	2	5	14	5	2	1	24	0	26	1	43	13	6	6	63	4	6	0	4	16	183	5	0	9	2	0	8	16	32	6	17	0	2	5	11	2
OTU_734	k__Bacteria	p__Firmicutes	c__Clostridia	o__Clostridiales	f__Ruminococcaceae	Others	Others	0	0	0	0	0	0	0	0	0	0	0	0	0	0	0	0	0	0	0	0	0	0	0	0	0	0	0	0	0	0	0	0	0	0	0	0	0	0	0	0
OTU_735	k__Bacteria	p__Atribacteria	c__unidentified_Atribacteria	o__unidentified_Atribacteria	f__unidentified_Atribacteria	g__unidentified_Atribacteria	s__Atribacteria_bacterium_JGI_0000079-F20	0	0	0	0	0	106	0	0	0	0	0	0	0	0	0	0	0	0	0	0	0	0	0	0	0	0	4	0	0	0	0	0	0	0	0	0	0	0	0	0
OTU_736	k__Bacteria	p__Firmicutes	c__Erysipelotrichia	o__Erysipelotrichales	f__Erysipelotrichaceae	g__Dubosiella	s__	15	30	0	0	129	123	2	166	2200	226	611	20	21	78	5	2	6	5	275	165	3	5	6	281	4	1589	22	0	0	2	557	61	6	44	4	24	9	58	363	0
OTU_737	k__Bacteria	p__Firmicutes	c__Clostridia	o__Clostridiales	f__Ruminococcaceae	Others	Others	0	0	0	0	0	0	2	0	0	0	0	0	0	0	0	0	0	0	0	0	0	0	0	0	0	0	0	0	0	0	0	0	0	0	0	0	0	0	0	0
OTU_738	k__Bacteria	p__Firmicutes	c__Clostridia	o__Clostridiales	f__Ruminococcaceae	Others	Others	0	0	1	0	25	9	0	15	0	2	3	0	0	38	2	5	3	3	21	8	0	0	0	0	30	20	8	1	16	4	11	0	0	2	6	10	64	22	11	1
OTU_739	k__Bacteria	p__Firmicutes	c__Clostridia	o__Clostridiales	f__Ruminococcaceae	Others	Others	0	0	0	0	0	0	0	4	0	0	0	0	0	0	0	0	0	0	0	0	0	2	3	0	0	0	0	0	15	0	0	0	6	0	0	0	0	0	0	0
OTU_740	k__Bacteria	p__Proteobacteria	c__Deltaproteobacteria	o__Desulfovibrionales	f__Desulfovibrionaceae	g__Desulfovibrio	Others	3	3	0	0	1	0	0	0	0	0	0	1	0	0	0	0	0	0	3	2	0	0	0	0	0	0	0	0	0	1	0	0	1	0	0	0	3	0	3	0
OTU_742	k__Bacteria	p__Chloroflexi	c__Anaerolineae	o__	f__	g__	s__	0	0	0	0	0	35	0	0	0	0	0	0	0	0	0	0	0	0	0	0	0	0	0	0	0	0	3	0	0	0	0	0	0	0	0	0	0	0	0	0
OTU_743	k__Bacteria	p__Firmicutes	c__Clostridia	o__Clostridiales	f__Ruminococcaceae	Others	Others	0	0	33	0	0	4	0	179	0	0	0	0	0	0	0	0	0	9	0	0	0	0	0	0	0	0	0	0	0	0	0	0	0	0	0	0	0	0	0	0
OTU_744	k__Bacteria	p__Firmicutes	c__Clostridia	o__Clostridiales	f__Ruminococcaceae	g__Butyricicoccus	Others	7	0	0	0	3	8	0	4	0	0	7	2	38	18	0	0	0	0	0	2	0	0	0	0	23	1	0	0	0	1	4	2	0	3	0	0	0	0	4	0
OTU_745	k__Bacteria	p__Firmicutes	c__Clostridia	o__Clostridiales	f__Ruminococcaceae	Others	Others	0	0	0	0	5	0	0	1	0	17	1	0	0	5	0	0	0	0	0	0	0	1	0	0	0	0	0	0	0	0	0	5	10	0	0	1	0	0	0	0
OTU_746	k__Bacteria	p__Tenericutes	c__Mollicutes	o__	f__	g__	s__	0	0	0	0	0	0	0	0	0	1	2	0	0	0	0	2	0	0	3	0	0	0	0	0	1	0	0	1	2	0	0	0	0	0	0	0	0	0	0	0
OTU_747	k__Bacteria	p__Gemmatimonadetes	c__	o__	f__	g__	s__	0	16	0	0	0	0	0	0	0	0	0	0	0	0	0	0	0	0	0	0	0	0	0	0	0	0	0	0	0	0	0	0	0	0	0	0	0	0	0	0
OTU_748	k__Bacteria	p__Bacteroidetes	c__Bacteroidia	o__Bacteroidales	f__Prevotellaceae	g__Alloprevotella	Others	0	0	0	0	0	0	0	0	0	0	0	0	0	0	0	0	0	0	0	0	0	0	0	0	0	0	0	0	0	0	0	0	0	0	0	0	0	0	0	0
OTU_749	k__Bacteria	p__Firmicutes	c__Clostridia	o__Clostridiales	f__Lachnospiraceae	g__Roseburia	s__Roseburia_inulinivorans	0	3	3	1	0	0	3	10	0	0	0	0	0	0	0	0	0	0	0	0	0	0	2	0	0	0	0	0	3	0	0	0	4	0	0	0	0	0	0	0
OTU_750	k__Bacteria	Others	Others	Others	Others	Others	Others	0	0	0	0	0	0	0	0	0	0	0	1	0	0	0	0	0	0	0	0	0	0	0	0	0	0	0	0	0	0	0	0	0	0	0	0	0	0	0	0
OTU_751	k__Bacteria	p__Firmicutes	c__Clostridia	o__Clostridiales	f__Ruminococcaceae	g__Harryflintia	s__	0	0	0	0	0	0	0	0	0	0	0	0	0	0	0	2	2	0	0	3	0	0	0	0	1	0	0	0	0	0	0	0	1	0	0	0	0	2	0	0
OTU_752	k__Bacteria	p__Firmicutes	c__Clostridia	o__Clostridiales	Others	Others	Others	0	0	0	0	0	0	0	1	0	0	0	0	0	0	0	0	0	0	0	0	0	0	0	0	2	0	0	0	0	0	0	1	0	0	0	0	1	0	0	2
OTU_753	k__Bacteria	p__Firmicutes	c__Clostridia	o__Clostridiales	Others	Others	Others	0	0	26	0	0	0	2	0	0	0	0	36	0	0	23	2	10	0	13	0	2	9	0	0	2	0	0	2	1	0	4	0	8	0	39	12	0	9	0	1
OTU_754	k__Bacteria	p__Firmicutes	c__Clostridia	o__Clostridiales	f__unidentified_Clostridiales	g__Anaerovorax	s__	3	0	0	0	0	0	0	0	0	0	2	0	0	0	0	0	0	0	3	0	0	0	0	0	0	0	0	0	0	0	0	0	0	0	0	3	0	0	0	0
OTU_756	k__Bacteria	p__Firmicutes	c__Clostridia	o__Clostridiales	f__Ruminococcaceae	Others	Others	0	0	0	0	0	0	0	0	0	0	0	0	0	0	0	0	0	0	0	0	0	0	0	0	1	0	0	0	0	0	0	0	0	0	0	0	0	0	0	0
OTU_757	k__Bacteria	p__unidentified_Bacteria	c__unidentified_Bacteria	o__Campylobacterales	f__unidentified_Campylobacterales	g__Arcobacter	s__	0	0	0	0	0	42	0	0	0	0	0	0	0	0	0	0	0	0	1	0	0	0	0	0	0	0	0	0	0	0	0	0	0	0	0	0	0	0	0	0
OTU_758	k__Bacteria	p__Bacteroidetes	c__Bacteroidia	o__Bacteroidales	f__Muribaculaceae	Others	Others	0	0	0	0	0	0	0	4	0	0	0	0	0	0	0	0	30	0	0	0	0	0	5	0	0	0	0	0	0	0	0	0	0	0	0	0	0	0	0	1
OTU_760	k__Bacteria	p__Chloroflexi	c__Anaerolineae	o__Anaerolineales	f__Anaerolineaceae	g__Flexilinea	Others	0	0	0	0	0	68	0	0	0	0	0	0	0	0	0	0	0	0	0	0	0	0	0	0	0	0	0	0	0	0	0	0	0	0	0	0	0	0	0	0
OTU_761	k__Bacteria	p__Tenericutes	c__Mollicutes	o__Anaeroplasmatales	f__Anaeroplasmataceae	g__Anaeroplasma	s__	0	0	0	0	0	2	0	0	1	0	0	0	0	12	0	0	0	0	0	0	0	0	0	2	0	0	2	0	0	0	0	0	0	4	0	0	0	0	0	0
OTU_762	k__Bacteria	p__Firmicutes	c__Clostridia	o__Clostridiales	f__Lachnospiraceae	Others	Others	0	0	0	0	1	0	0	3	0	0	0	3	0	0	2	0	0	2	0	0	1	1	0	2	14	0	0	49	3	0	0	147	0	0	4	2	0	0	0	0
OTU_763	k__Bacteria	p__Firmicutes	c__Clostridia	o__Clostridiales	f__Lachnospiraceae	Others	Others	0	0	0	0	0	0	0	0	0	0	0	0	0	39	0	0	0	0	0	0	0	1	0	0	0	0	0	0	0	0	0	0	0	0	0	0	0	0	0	0
OTU_764	k__Bacteria	p__Firmicutes	c__Negativicutes	o__Selenomonadales	f__Acidaminococcaceae	g__	s__	0	0	0	0	0	20	0	0	0	0	0	0	0	0	0	0	0	0	0	0	0	0	0	0	0	0	0	0	0	0	0	0	0	0	0	0	0	0	0	0
OTU_765	k__Bacteria	p__Firmicutes	c__Clostridia	o__Clostridiales	f__Lachnospiraceae	g__Blautia	s__Lachnospiraceae_bacterium_609	5	0	0	3	1	0	0	0	0	0	4	0	7	0	0	19	0	0	0	0	0	0	0	0	4	0	0	0	0	0	2	0	0	0	0	0	3	5	0	0
OTU_766	k__Bacteria	p__Firmicutes	c__Clostridia	o__Clostridiales	f__Lachnospiraceae	g__unidentified_Lachnospiraceae	s__Clostridium_sp_ASF502	2	10	2	1	1	0	1	0	13	14	51	51	37	8	2	11	2	1	10	4	0	4	15	1	11	3	4	19	4	7	27	15	1	6	0	4	1	7	4	0
OTU_767	k__Bacteria	p__Bacteroidetes	c__Bacteroidia	o__Bacteroidales	f__Prevotellaceae	g__	s__	0	3	0	0	0	0	0	0	0	0	0	0	0	0	0	0	13	0	0	0	0	0	0	0	0	0	0	0	0	0	0	0	1	0	0	4	0	0	0	0
OTU_769	k__Archaea	p__Euryarchaeota	c__Methanobacteria	o__Methanobacteriales	f__Methanobacteriaceae	g__Methanobacterium	s__	0	0	0	0	0	64	0	1	0	0	0	0	0	0	0	0	0	0	0	0	0	0	0	0	0	0	0	0	0	0	0	0	0	0	0	0	0	0	0	0
OTU_771	k__Bacteria	p__Tenericutes	c__Mollicutes	o__	f__	g__	s__	0	0	0	0	0	0	0	0	0	0	0	0	1	0	0	0	0	0	0	0	0	0	0	0	0	1	0	8	2	0	0	0	0	0	0	0	0	0	0	0
OTU_773	k__Bacteria	p__Firmicutes	c__Clostridia	o__Clostridiales	Others	Others	Others	0	0	0	0	0	0	0	0	0	0	0	0	0	0	0	0	0	0	0	0	0	0	0	0	0	0	0	0	0	0	0	0	0	0	0	0	0	0	2	0
OTU_774	k__Bacteria	p__Proteobacteria	c__Gammaproteobacteria	o__Pseudomonadales	f__Pseudomonadaceae	g__Pseudomonas	s__Pseudomonas_citronellolis	0	0	0	0	0	0	0	0	0	0	0	0	0	0	0	0	0	0	0	0	0	0	0	0	0	3	0	0	0	0	0	0	0	0	0	0	0	0	0	0
OTU_775	k__Bacteria	p__Proteobacteria	Others	Others	Others	Others	Others	0	0	0	0	0	0	0	0	0	0	0	0	0	0	0	0	0	0	0	0	0	0	0	0	0	0	0	0	0	0	2	0	0	0	0	0	0	0	0	0
OTU_776	k__Bacteria	p__Firmicutes	c__Clostridia	o__Clostridiales	f__Lachnospiraceae	Others	Others	2	13	4	17	0	0	2	0	1	4	0	0	5	6	0	14	4	0	0	0	0	0	0	2	0	6	0	9	8	0	1	0	0	8	3	0	0	0	0	1
OTU_777	k__Bacteria	p__Firmicutes	c__Clostridia	o__Clostridiales	f__Ruminococcaceae	Others	Others	0	0	0	0	0	0	0	0	0	0	0	0	0	0	2	0	0	0	0	0	0	0	0	0	1	0	0	0	0	0	0	0	0	0	0	0	0	0	0	0
OTU_778	k__Bacteria	p__Firmicutes	c__Negativicutes	o__Selenomonadales	f__Veillonellaceae	g__Dialister	Others	0	0	0	0	0	0	0	0	0	0	0	0	0	0	0	0	0	0	0	0	0	0	2	0	0	0	0	0	0	0	0	0	0	0	0	0	0	0	0	0
OTU_779	k__Bacteria	p__Bacteroidetes	c__Bacteroidia	o__Bacteroidales	f__Marinifilaceae	g__Odoribacter	s__	307	21	37	29	0	2	0	4	1	1	0	93	40	9	32	3	37	25	279	4	2	23	4	10	1	25	4	40	139	8	3	17	3	0	165	182	3	21	5	0
OTU_781	k__Bacteria	p__Firmicutes	c__Clostridia	o__Clostridiales	f__Ruminococcaceae	g__Faecalibacterium	s__	0	0	0	0	0	0	0	0	0	0	0	0	0	0	0	0	0	0	0	0	0	0	0	0	0	0	0	0	0	0	0	0	0	0	2	0	0	0	0	0
OTU_782	k__Bacteria	p__Bacteroidetes	c__Bacteroidia	o__Bacteroidales	f__unidentified_Bacteroidales	g__Petrimonas	s__	0	0	0	0	0	30	0	0	0	0	0	0	0	0	0	0	0	0	0	0	0	0	0	0	0	0	0	0	0	0	0	0	0	0	0	0	0	0	0	0
OTU_783	k__Bacteria	p__Firmicutes	c__Clostridia	o__Clostridiales	f__Lachnospiraceae	g__Roseburia	s__Eubacterium_plexicaudatum	0	0	0	0	0	0	1	0	0	0	0	0	0	29	0	52	3	0	2	0	0	1	0	0	7	22	162	17	28	2	0	11	8	0	49	322	0	0	0	5
OTU_784	k__Bacteria	p__Spirochaetes	c__Spirochaetia	o__Spirochaetales	f__Spirochaetaceae	Others	Others	0	0	0	0	0	24	0	0	0	0	0	0	0	0	0	0	0	0	0	0	0	0	0	0	0	0	0	0	0	0	0	0	0	0	0	0	0	0	0	0
OTU_785	k__Bacteria	p__Firmicutes	c__Clostridia	o__Clostridiales	f__Lachnospiraceae	g__unidentified_Lachnospiraceae	s__Clostridium_sp_Culture-27	0	7	2	0	0	0	26	11	0	0	23	54	97	1	64	40	2	1	0	13	0	1	0	0	0	0	4	62	8	4	0	8	12	17	31	0	23	0	21	11
OTU_786	k__Bacteria	p__Firmicutes	c__Clostridia	o__Clostridiales	f__Lachnospiraceae	Others	Others	1	21	32	7	6	22	4	8	26	0	124	10	89	53	0	0	1	139	0	21	3	49	9	4	0	18	8	13	168	24	2	2	0	6	32	16	12	1	32	1
OTU_787	k__Bacteria	p__Proteobacteria	c__Gammaproteobacteria	o__unidentified_Gammaproteobacteria	f__Burkholderiaceae	g__Sutterella	s__Sutterella_wadsworthensis	0	0	0	0	0	0	0	0	0	0	0	2	0	0	0	0	0	0	0	0	0	1	3	0	0	0	0	0	24	0	0	0	0	0	0	0	0	0	0	0
OTU_788	k__Bacteria	Others	Others	Others	Others	Others	Others	0	0	0	0	0	0	0	0	0	0	0	0	0	0	0	0	0	0	0	0	0	0	0	0	1	0	0	0	0	0	0	0	0	0	0	0	0	0	0	0
OTU_789	k__Bacteria	p__Firmicutes	c__Clostridia	o__Clostridiales	f__Lachnospiraceae	Others	Others	26	19	4	33	10	3	20	10	2	0	3	6	83	9	6	19	10	3	0	16	0	31	5	4	21	0	29	103	64	199	1	168	29	21	31	26	3	4	28	5
OTU_790	k__Bacteria	p__Bacteroidetes	c__Ignavibacteria	Others	Others	Others	Others	0	0	0	0	0	0	0	0	0	0	0	0	0	0	0	0	0	0	0	0	0	0	0	0	0	0	0	0	0	0	0	0	4	0	0	0	0	0	0	0
OTU_791	k__Bacteria	p__Firmicutes	c__Clostridia	o__Clostridiales	Others	Others	Others	0	0	0	0	0	0	0	0	0	0	0	0	0	0	3	0	0	0	3	0	0	0	0	0	0	0	0	0	0	0	0	0	0	2	0	0	0	0	0	0
OTU_793	k__Bacteria	p__Proteobacteria	c__Deltaproteobacteria	o__Desulfovibrionales	f__Desulfomicrobiaceae	g__Desulfomicrobium	s__	0	0	0	0	0	27	0	2	0	0	0	0	0	0	0	0	0	0	0	0	2	0	0	0	0	0	0	0	0	0	0	0	0	0	0	0	0	0	0	0
OTU_794	k__Bacteria	p__Firmicutes	c__Clostridia	o__Clostridiales	f__Lachnospiraceae	g__Lachnoclostridium	Others	3	3	2	3	0	0	53	1	0	0	7	14	1	0	3	0	5	0	4	2	8	3	697	0	0	0	0	1	3	0	0	1	1	3	1	0	1	20	0	3
OTU_795	k__Bacteria	p__Proteobacteria	c__Gammaproteobacteria	o__Enterobacteriales	f__Enterobacteriaceae	g__Morganella	s__	0	0	2	0	0	0	0	1	2	0	0	0	0	0	0	0	0	0	0	0	0	0	2	0	0	0	0	0	0	0	0	0	0	0	0	0	0	0	0	0
OTU_796	k__Bacteria	p__Proteobacteria	c__Deltaproteobacteria	o__Desulfovibrionales	f__Desulfovibrionaceae	g__Bilophila	Others	0	0	0	0	0	0	0	1	0	0	0	0	0	0	0	0	0	1	0	0	0	1	1	0	0	0	0	0	9	0	0	0	0	0	0	0	0	0	0	0
OTU_797	k__Bacteria	p__Bacteroidetes	c__Bacteroidia	o__Bacteroidales	Others	Others	Others	0	0	0	0	0	50	0	2	0	0	0	0	0	0	0	0	0	0	0	0	0	0	0	0	0	0	0	0	0	0	0	0	0	0	0	0	0	0	0	0
OTU_798	k__Bacteria	p__Firmicutes	c__Clostridia	o__Clostridiales	f__Ruminococcaceae	Others	Others	0	0	0	0	0	0	0	0	0	0	0	0	0	0	0	0	0	0	1	0	0	0	0	0	0	0	0	0	1	0	0	0	0	0	0	0	0	1	0	4
OTU_799	k__Bacteria	p__Bacteroidetes	c__Bacteroidia	o__Bacteroidales	f__Bacteroidaceae	g__Bacteroides	s__	0	0	0	0	0	0	0	0	0	0	0	0	1	0	0	0	0	0	0	0	0	1	0	0	0	0	0	0	0	0	0	0	0	0	0	0	0	0	0	0
OTU_800	k__Bacteria	p__Firmicutes	c__Clostridia	o__Clostridiales	f__Ruminococcaceae	Others	Others	0	0	0	0	2	2	1	31	0	0	0	0	0	0	0	2	1	0	0	0	0	1	0	0	0	0	0	14	7	0	0	0	0	0	0	0	0	0	0	3
OTU_801	k__Bacteria	p__Firmicutes	c__Bacilli	o__Lactobacillales	f__Lactobacillaceae	g__Lactobacillus	Others	3	6	13	4	25	35	27	45	37	55	313	283	46	164	77	170	42	14	75	39	56	207	237	47	91	74	60	213	310	496	79	873	73	47	10	11	16	41	21	162
OTU_803	k__Bacteria	p__Firmicutes	c__Clostridia	o__Clostridiales	Others	Others	Others	0	0	1	0	0	0	0	0	0	0	0	0	0	3	0	0	0	2	3	0	0	0	0	0	0	0	0	1	0	0	0	0	0	0	1	0	0	0	0	0
OTU_804	k__Bacteria	p__Firmicutes	c__Clostridia	o__Clostridiales	f__Peptostreptococcaceae	g__Terrisporobacter	s__	0	0	0	0	0	0	0	19	0	0	0	0	0	0	0	0	0	0	0	0	0	0	0	3	0	1	1	0	1	0	0	0	0	0	0	0	0	0	0	0
OTU_806	k__Bacteria	p__Firmicutes	c__Clostridia	o__Clostridiales	f__Ruminococcaceae	Others	Others	0	0	0	0	0	0	0	0	0	0	0	0	0	1	1	0	0	0	0	0	0	0	0	3	0	0	0	0	0	0	0	0	0	0	0	0	0	0	0	3
OTU_807	k__Bacteria	p__Firmicutes	c__Clostridia	o__Clostridiales	f__Ruminococcaceae	g__unidentified_Ruminococcaceae	Others	0	2	0	0	0	0	0	0	0	8	1	0	17	1	4	0	10	0	0	3	0	6	4	9	0	0	1	0	12	13	0	3	0	0	0	199	1	0	1	2
OTU_808	k__Bacteria	p__Firmicutes	c__Clostridia	o__Clostridiales	f__Lachnospiraceae	Others	Others	0	0	0	0	0	33	0	0	0	0	0	0	0	0	0	0	0	0	0	0	0	0	0	0	0	0	0	0	0	0	0	2	0	0	0	0	0	0	0	0
OTU_809	k__Bacteria	p__Firmicutes	c__Clostridia	o__Clostridiales	f__Ruminococcaceae	Others	Others	0	0	0	0	0	0	1	2	0	0	0	0	0	0	0	0	0	0	0	0	0	0	0	0	0	0	0	0	0	0	0	0	0	0	0	0	0	0	0	0
OTU_810	k__Bacteria	p__Firmicutes	c__Clostridia	o__Clostridiales	f__Lachnospiraceae	Others	Others	269	8	11	275	15	3	2	3	5	4	19	92	46	58	2	65	113	4	1	4	46	13	9	72	14	12	3	7	18	3	11	7	66	99	79	0	33	10	6	19
OTU_811	k__Bacteria	Others	Others	Others	Others	Others	Others	0	0	0	0	0	0	0	0	0	0	0	0	0	0	0	0	0	0	0	0	0	2	0	0	0	0	0	0	0	0	0	3	0	0	0	0	0	1	0	0
OTU_812	k__Bacteria	p__Bacteroidetes	c__Bacteroidia	o__Bacteroidales	f__Prolixibacteraceae	g__Mariniphaga	s__	0	0	0	0	0	27	0	0	0	0	0	0	0	0	0	0	0	0	0	0	0	0	0	0	0	0	0	0	0	0	0	0	0	0	0	0	0	0	0	0
OTU_813	k__Bacteria	p__Actinobacteria	c__unidentified_Actinobacteria	o__Bifidobacteriales	f__Bifidobacteriaceae	g__Bifidobacterium	s__Bifidobacterium_animalis	2	6	5	4	6	9	3	10	2	6	1	0	0	43	0	0	8	2	5	24	0	3	1	225	0	1	5	1	0	1	0	7	0	21	2	3	3	8	23	1
OTU_814	k__Bacteria	p__Firmicutes	c__Clostridia	o__Clostridiales	f__Ruminococcaceae	Others	Others	0	0	0	0	0	1	0	0	0	0	0	0	0	2	0	0	0	0	0	0	0	0	0	1	12	0	0	0	0	3	0	0	0	0	0	0	4	41	0	0
OTU_815	k__Bacteria	p__Firmicutes	c__Erysipelotrichia	o__Erysipelotrichales	f__Erysipelotrichaceae	g__Dubosiella	s__	160	23	319	125	639	268	426	388	6	164	105	94	0	40	8	278	394	23	209	16	114	245	121	53	3	13	3	106	106	12	6	7	4	437	2	167	75	99	14	219
OTU_816	k__Bacteria	p__Proteobacteria	c__Alphaproteobacteria	o__Rickettsiales	f__Anaplasmataceae	g__Wolbachia	s__Wolbachia_sp	0	0	0	0	0	0	0	0	0	0	0	0	0	0	0	0	0	0	0	0	0	0	0	0	0	0	0	2	0	0	0	0	0	0	0	0	0	0	0	0
OTU_818	k__Bacteria	p__Bacteroidetes	c__Bacteroidia	o__Bacteroidales	f__Muribaculaceae	g__	s__	0	0	0	0	0	0	0	6	0	0	0	0	0	0	2	0	2	0	0	0	8	0	0	2	0	0	0	0	0	0	0	0	0	0	0	1	0	0	0	0
OTU_820	k__Bacteria	p__Synergistetes	c__Synergistia	o__Synergistales	f__Synergistaceae	Others	Others	0	0	0	0	0	19	0	0	0	0	0	0	0	0	0	0	0	0	0	0	0	0	0	0	0	0	0	0	0	0	0	0	0	0	0	0	0	0	0	0
OTU_821	k__Bacteria	p__Firmicutes	c__Clostridia	o__Clostridiales	f__Ruminococcaceae	g__Flavonifractor	s__	0	0	0	0	0	0	0	0	0	0	0	0	0	0	0	0	0	0	0	2	0	0	0	0	0	1	0	1	0	0	0	0	0	0	0	0	0	0	1	0
OTU_823	k__Bacteria	p__Tenericutes	c__Mollicutes	o__	f__	g__	s__	0	0	0	0	0	0	3	0	0	0	0	0	0	0	0	0	1	0	0	0	0	0	0	0	0	0	0	3	0	0	0	0	0	0	0	0	0	0	0	0
OTU_824	k__Bacteria	p__Melainabacteria	Others	Others	Others	Others	Others	0	23	0	0	0	0	0	0	0	0	0	0	0	0	0	0	0	0	0	0	0	0	0	0	0	0	0	0	2	0	0	0	0	0	0	0	0	0	0	0
OTU_825	k__Bacteria	p__Firmicutes	c__Bacilli	o__Lactobacillales	f__Carnobacteriaceae	g__Jeotgalibaca	Others	0	0	0	0	0	1	0	0	0	0	0	0	0	0	0	0	0	0	0	0	0	0	0	0	0	0	0	0	0	0	0	0	0	0	0	0	0	0	0	0
OTU_826	k__Bacteria	p__Firmicutes	c__Clostridia	o__Clostridiales	f__Ruminococcaceae	Others	Others	0	0	0	0	0	0	45	0	3	0	1	12	12	13	42	0	10	3	1	2	6	4	13	23	0	4	14	5	28	49	10	2	10	0	31	74	139	15	5	30
OTU_827	k__Bacteria	p__Firmicutes	c__Clostridia	o__Clostridiales	f__Lachnospiraceae	Others	Others	0	0	0	2	0	0	0	0	0	0	0	0	0	0	0	0	0	0	0	0	0	0	0	0	0	0	0	2	4	0	0	4	0	0	0	0	0	0	0	0
OTU_828	k__Bacteria	p__Tenericutes	c__Mollicutes	o__	f__	g__	s__	0	0	0	0	0	0	0	0	0	0	0	0	0	0	1	0	0	0	0	0	0	0	0	0	0	0	6	0	0	0	0	0	0	0	0	42	0	0	0	5
OTU_829	k__Bacteria	p__Firmicutes	c__Clostridia	o__Clostridiales	f__Lachnospiraceae	g__unidentified_Lachnospiraceae	Others	2	0	0	0	1	0	0	3	0	3	11	16	2	1	2	0	7	0	1	0	1	0	6	0	7	0	3	5	14	49	3	5	2	2	1	59	2	1	0	8
OTU_830	k__Bacteria	p__Tenericutes	c__Mollicutes	o__	f__	g__	s__	0	0	0	0	0	0	0	20	0	0	0	0	0	0	0	0	0	0	0	0	0	0	0	0	0	0	0	0	6	0	0	0	0	0	0	0	0	0	0	0
OTU_832	k__Bacteria	p__Firmicutes	c__Clostridia	o__Clostridiales	f__Ruminococcaceae	g__Intestinimonas	Others	10	2	4	9	8	3	20	9	2	7	4	60	18	29	25	2	20	8	10	9	12	16	21	10	0	2	7	67	61	21	13	33	4	5	25	8	32	37	11	16
OTU_833	k__Bacteria	p__Tenericutes	c__Mollicutes	o__	f__	g__	s__	0	0	0	0	0	0	0	0	0	0	4	0	0	0	0	0	0	0	0	0	0	0	0	0	0	7	0	0	0	0	0	0	0	0	0	0	0	0	0	0
OTU_834	k__Bacteria	p__Firmicutes	c__Erysipelotrichia	o__Erysipelotrichales	f__Erysipelotrichaceae	g__Dubosiella	s__	1	0	3	0	10	7	23	4	65	24	63	15	0	3	34	0	2	0	4	22	6	5	44	40	0	76	20	0	0	0	54	14	8	17	3	28	8	4	23	2
OTU_836	k__Bacteria	p__unidentified_Bacteria	c__unidentified_Bacteria	o__Campylobacterales	f__Helicobacteraceae	g__Helicobacter	Others	0	2	10	8	0	0	3	3	0	0	2	12	0	0	6	0	2	2	0	0	0	0	13	0	1	3	0	2	0	0	0	1	6	0	0	5	3	5	0	7
OTU_838	k__Bacteria	p__Firmicutes	c__Clostridia	o__Clostridiales	f__Ruminococcaceae	g__Intestinimonas	Others	0	0	0	0	0	0	0	3	0	0	0	0	0	0	0	0	0	0	0	0	0	0	0	0	0	0	0	0	0	0	0	0	0	0	0	0	0	0	0	0
OTU_839	k__Bacteria	p__Firmicutes	c__Clostridia	o__Clostridiales	f__Lachnospiraceae	Others	Others	0	4	0	0	0	0	0	0	1	0	0	0	14	7	0	0	0	5	0	0	0	0	0	2	0	0	9	2	3	1	0	0	0	0	0	1	2	0	0	0
OTU_842	k__Bacteria	p__Firmicutes	c__Clostridia	o__Clostridiales	f__Lachnospiraceae	g__Agathobacter	s__Eubacterium_ramulus	0	0	0	3	0	0	0	2	0	0	0	0	0	0	0	0	0	0	0	0	0	0	2	0	0	0	0	0	3	0	0	0	2	0	0	0	0	0	0	0
OTU_844	k__Bacteria	p__Firmicutes	c__Clostridia	o__Clostridiales	f__Lachnospiraceae	g__Lachnoclostridium	Others	102	114	11	114	14	20	11	18	6	0	79	5	3	3	6	7	32	1	2	8	1	5	19	3	89	3	0	36	18	46	0	18	11	41	2	6	54	40	7	17
OTU_845	k__Bacteria	p__Bacteroidetes	c__Bacteroidia	o__Chitinophagales	f__Chitinophagaceae	Others	Others	1	7	0	0	0	0	0	0	0	0	0	0	0	0	0	0	0	0	0	0	0	0	0	0	0	0	0	0	0	0	0	0	0	0	0	0	0	0	0	0
OTU_846	k__Bacteria	p__Firmicutes	c__Clostridia	o__Clostridiales	f__Lachnospiraceae	Others	Others	0	7	0	3	8	7	1	6	3	4	3	3	35	2	1	33	29	0	0	0	0	1	3	0	3	6	0	152	12	26	3	4	0	17	1	4	13	2	0	2
OTU_847	k__Bacteria	p__Firmicutes	c__Clostridia	o__Clostridiales	f__Lachnospiraceae	Others	Others	0	0	0	0	0	0	0	0	0	0	0	0	0	0	0	0	2	0	0	0	0	0	0	0	0	0	0	0	0	0	0	0	0	0	0	0	0	0	0	0
OTU_848	k__Bacteria	p__Firmicutes	c__Clostridia	o__Clostridiales	f__Lachnospiraceae	g__Blautia	Others	0	0	0	0	0	0	0	3	0	0	0	0	0	0	0	0	0	0	0	0	0	0	1	0	0	0	0	0	2	0	0	0	0	0	0	0	0	0	0	0
OTU_850	k__Bacteria	p__Proteobacteria	c__Gammaproteobacteria	o__unidentified_Gammaproteobacteria	Others	Others	Others	0	3	0	0	0	0	0	2	0	0	0	0	0	0	0	0	0	0	0	0	0	0	1	0	0	0	0	0	0	0	0	0	5	0	1	0	0	0	0	0
OTU_851	k__Bacteria	p__Bacteroidetes	c__Bacteroidia	o__Bacteroidales	f__Muribaculaceae	g__	s__	0	0	0	0	0	0	0	0	0	0	0	0	0	0	0	1	12	0	0	0	0	0	0	0	0	0	0	0	0	0	0	0	0	0	0	0	0	0	0	0
OTU_852	k__Bacteria	p__Firmicutes	c__Bacilli	o__Lactobacillales	f__Lactobacillaceae	g__Lactobacillus	Others	0	38	0	0	2	0	0	0	0	0	0	0	1	1	0	0	0	0	0	0	0	0	0	19	0	0	6	0	1	0	0	0	1	0	0	0	0	0	7	0
OTU_853	k__Bacteria	p__Firmicutes	c__Clostridia	o__Clostridiales	f__Lachnospiraceae	g__unidentified_Lachnospiraceae	s__Lachnospiraceae_bacterium_COE1	32	2	1	16	0	0	10	0	0	0	5	8	83	5	143	3	4	1	4	0	9	1	0	0	13	36	0	5	6	0	69	143	48	10	29	462	4	6	2	7
OTU_854	k__Bacteria	p__Firmicutes	c__Clostridia	o__Clostridiales	f__Ruminococcaceae	Others	Others	0	4	13	0	0	3	0	0	0	0	3	0	0	15	1	0	0	0	0	0	0	0	0	0	0	0	0	0	80	0	0	1	0	0	0	0	0	0	0	0
OTU_856	k__Bacteria	p__Bacteroidetes	c__Bacteroidia	o__Bacteroidales	f__Muribaculaceae	g__	s__	0	0	0	0	0	0	0	0	0	0	0	0	0	0	4	0	0	0	0	0	0	0	0	0	0	0	0	0	0	0	0	0	0	0	0	0	0	0	0	0
OTU_857	k__Bacteria	p__Proteobacteria	c__Gammaproteobacteria	o__unidentified_Gammaproteobacteria	f__Nitrosomonadaceae	g__	s__	0	1	1	0	0	0	0	0	0	0	0	0	0	0	0	0	0	0	0	0	0	0	0	0	0	0	0	4	0	0	0	0	0	0	0	0	0	0	0	0
OTU_858	k__Bacteria	p__Firmicutes	c__Negativicutes	o__Selenomonadales	f__Veillonellaceae	g__Allisonella	s__	0	0	0	0	0	0	0	0	0	0	0	0	0	0	0	0	0	0	0	0	0	0	0	0	0	0	0	0	7	0	0	0	0	0	0	0	0	0	0	0
OTU_859	k__Bacteria	p__Firmicutes	c__Clostridia	o__Clostridiales	f__Lachnospiraceae	Others	Others	6	3	7	17	12	2	0	0	2	0	0	0	0	23	7	0	0	0	0	0	2	2	0	8	0	0	0	0	0	0	0	0	0	0	0	0	0	0	0	0
OTU_860	k__Bacteria	p__Firmicutes	c__Clostridia	o__Clostridiales	f__Ruminococcaceae	g__Ruminiclostridium	s__	0	0	0	0	0	0	0	0	0	0	0	0	0	0	3	2	0	0	0	0	0	0	0	0	0	0	0	0	0	0	0	0	0	0	1	0	0	0	0	0
OTU_861	k__Bacteria	p__Firmicutes	c__Clostridia	o__Clostridiales	f__Lachnospiraceae	Others	Others	0	3	0	0	2	6	0	2	0	0	1	1	47	74	9	0	8	33	0	10	0	0	0	15	0	1	16	32	8	8	0	33	0	12	0	0	13	27	7	0
OTU_863	k__Bacteria	p__Firmicutes	c__Clostridia	o__Clostridiales	f__Ruminococcaceae	Others	Others	12	6	0	1	7	10	17	10	6	1	5	7	43	7	8	9	3	26	88	0	4	37	7	15	44	3	0	0	1	0	4	2	0	0	17	0	0	6	1	0
OTU_864	k__Bacteria	p__Proteobacteria	c__Gammaproteobacteria	o__Vibrionales	f__Vibrionaceae	g__Vibrio	Others	0	0	1	0	0	0	0	0	0	0	0	0	0	0	0	0	0	0	0	0	0	0	1	0	0	0	0	0	0	0	0	0	0	0	0	0	0	0	0	0
OTU_865	k__Bacteria	p__Bacteroidetes	c__Bacteroidia	o__Bacteroidales	f__Bacteroidaceae	g__Bacteroides	s__Bacteroidaceae_bacterium_DJF_B220	0	2	0	0	0	0	0	0	0	0	0	0	0	0	0	0	0	0	0	0	0	0	0	0	0	0	0	0	27	0	0	0	0	0	0	0	0	0	0	0
OTU_866	k__Bacteria	p__Firmicutes	c__Clostridia	o__Clostridiales	f__Ruminococcaceae	Others	Others	0	0	0	0	0	0	0	9	0	0	0	6	0	0	4	7	26	0	0	0	0	0	1	0	21	0	0	0	0	5	0	1	0	1	4	18	4	0	0	0
OTU_867	k__Bacteria	p__Firmicutes	c__Clostridia	o__Clostridiales	f__Lachnospiraceae	Others	Others	0	0	0	0	0	0	11	0	0	0	0	0	0	0	0	0	3	0	0	0	0	0	0	0	0	0	0	0	0	0	0	0	0	0	0	0	0	0	0	0
OTU_868	k__Bacteria	p__Proteobacteria	c__Alphaproteobacteria	o__Rickettsiales	f__Rickettsiaceae	g__Rickettsia	s__	0	1	0	0	2	0	0	0	0	0	0	0	1	0	0	0	0	0	0	0	0	0	5	0	0	0	0	0	0	0	0	0	0	0	0	0	0	0	0	0
OTU_869	k__Bacteria	p__Firmicutes	c__Clostridia	o__Clostridiales	f__Lachnospiraceae	Others	Others	0	0	0	0	1	0	2	0	0	0	0	0	0	0	0	0	0	0	0	0	0	0	0	0	0	0	0	0	0	0	0	0	0	0	2	0	0	0	0	0
OTU_871	k__Bacteria	p__Actinobacteria	c__Coriobacteriia	o__Coriobacteriales	f__Eggerthellaceae	g__Parvibacter	s__	5	4	4	8	2	5	9	4	5	2	3	7	0	2	8	30	14	0	1	3	7	39	1	2	7	1	0	18	20	9	2	4	5	5	3	3	11	5	4	17
OTU_872	k__Bacteria	p__Firmicutes	c__Bacilli	o__Lactobacillales	f__Leuconostocaceae	g__Leuconostoc	Others	0	13	3	0	0	0	0	0	0	0	0	1	0	0	0	0	0	0	0	0	3	3	0	0	0	0	0	2	0	0	0	0	1	0	0	0	0	0	0	0
OTU_873	k__Bacteria	p__Fusobacteria	c__Fusobacteriia	o__Fusobacteriales	f__Fusobacteriaceae	g__Fusobacterium	s__Fusobacterium_mortiferum	0	0	2	0	0	0	0	2	0	0	0	2	0	0	0	0	1	0	0	0	0	0	2	0	0	2	0	0	0	0	0	0	0	0	0	0	0	0	0	3
OTU_874	k__Bacteria	p__Actinobacteria	c__unidentified_Actinobacteria	o__Micrococcales	f__Intrasporangiaceae	g__Terrabacter	s__	0	0	0	0	0	0	0	0	0	0	0	0	0	2	0	0	0	0	0	0	0	0	0	0	0	0	0	0	0	0	0	0	0	0	0	0	0	0	0	2
OTU_875	k__Bacteria	p__Firmicutes	c__Clostridia	o__Clostridiales	f__Lachnospiraceae	Others	Others	0	1	0	0	0	0	0	0	0	0	0	0	1	0	5	12	0	2	0	0	0	0	0	1	4	0	0	0	0	1	0	0	1	0	4	3	3	0	0	0
OTU_876	k__Bacteria	p__Firmicutes	c__Clostridia	o__Clostridiales	f__Lachnospiraceae	g__Blautia	s__Lachnospiraceae_bacterium_609	0	2	0	2	0	0	0	0	0	0	0	0	8	1	3	0	0	0	0	0	0	0	0	0	0	0	0	2	2	0	6	0	2	0	0	4	29	1	0	1
OTU_877	k__Bacteria	p__Deferribacteres	c__unidentified_Deferribacteres	o__Deferribacterales	f__Deferribacteraceae	g__Mucispirillum	Others	13	43	31	17	21	2	11	19	1	7	14	16	58	6	16	123	17	13	13	3	0	2	22	5	25	21	22	20	214	28	1	35	88	9	42	264	186	11	32	190
OTU_878	k__Bacteria	p__Firmicutes	c__Clostridia	o__Clostridiales	f__Ruminococcaceae	Others	Others	0	0	0	0	0	0	0	0	0	0	0	0	0	0	0	0	0	0	0	0	0	0	0	0	0	0	0	0	0	0	0	0	0	0	0	0	0	0	0	0
OTU_879	k__Bacteria	p__Bacteroidetes	c__Bacteroidia	o__Bacteroidales	f__Muribaculaceae	g__	s__	37	35	8	1	3	6	7	4	3	7	7	13	63	0	11	30	0	17	45	13	11	3	2	23	29	0	8	5	29	11	1	6	16	9	30	204	41	5	67	10
OTU_880	k__Bacteria	p__Bacteroidetes	c__Bacteroidia	o__Bacteroidales	f__Prevotellaceae	g__Paraprevotella	s__	0	0	0	0	0	0	0	0	0	0	0	0	0	0	0	0	0	0	0	0	0	0	0	0	0	0	0	0	22	0	0	0	0	0	0	0	0	0	0	0
OTU_881	k__Bacteria	p__Firmicutes	c__Clostridia	o__Clostridiales	f__Ruminococcaceae	g__Oscillibacter	Others	7	2	0	4	0	0	6	6	0	1	0	3	5	4	13	1	2	0	0	0	0	4	0	4	1	0	0	0	1	0	0	5	3	6	12	0	0	0	4	0
OTU_883	k__Bacteria	p__Tenericutes	c__Mollicutes	o__Anaeroplasmatales	f__Anaeroplasmataceae	g__Anaeroplasma	s__	4	0	0	0	0	0	0	8	0	0	0	0	0	0	0	0	0	0	0	0	0	0	0	0	6	0	0	0	0	0	0	0	0	0	0	0	0	0	0	0
OTU_884	k__Bacteria	p__unidentified_Bacteria	c__unidentified_Bacteria	o__unidentified_Bacteria	f__unidentified_Bacteria	g__Candidatus_Saccharimonas	s__	2	0	17	6	0	2	0	0	0	1	0	1	0	4	6	0	1	0	18	0	3	13	2	0	0	3	0	7	8	0	0	0	0	0	1	1	3	7	0	8
OTU_885	k__Bacteria	p__Firmicutes	c__Clostridia	o__Clostridiales	f__Lachnospiraceae	Others	Others	50	0	0	12	1	0	0	0	0	0	2	6	6	6	0	24	4	1	2	0	3	0	0	3	1	2	0	0	0	0	0	1	4	8	5	0	0	2	0	0
OTU_886	k__Bacteria	p__Firmicutes	c__Clostridia	o__Clostridiales	Others	Others	Others	0	0	0	0	0	0	0	3	0	0	0	2	0	0	0	0	0	0	1	0	0	0	0	0	0	0	0	0	1	0	0	0	0	0	0	0	0	0	0	0
OTU_887	k__Bacteria	p__Firmicutes	c__Clostridia	o__Clostridiales	f__Ruminococcaceae	g__unidentified_Ruminococcaceae	Others	3	21	6	2	16	1	7	6	0	52	19	2	205	8	119	0	42	9	4	14	5	25	2	48	63	1	3	17	18	14	0	3	11	7	34	128	1	6	11	0
OTU_889	k__Bacteria	p__Proteobacteria	c__Alphaproteobacteria	o__Micropepsales	f__Micropepsaceae	g__	s__	0	14	0	0	0	0	0	0	0	0	0	0	0	0	0	0	0	0	0	0	0	0	0	0	0	0	0	0	0	0	0	0	0	0	0	0	0	0	0	0
OTU_890	k__Bacteria	p__Firmicutes	c__Clostridia	o__Clostridiales	f__Christensenellaceae	g__	s__	0	0	0	0	0	55	0	0	0	0	0	0	0	0	0	0	0	0	0	0	0	0	0	0	0	0	0	0	0	0	0	0	0	0	0	0	0	0	0	0
OTU_891	k__Bacteria	p__Firmicutes	c__Clostridia	o__Clostridiales	f__Christensenellaceae	g__unidentified_Christensenellaceae	s__Clostridiales_bacterium_canine_oral_taxon_222	0	0	0	0	0	18	0	0	0	0	0	0	0	0	0	0	0	0	0	0	0	0	0	0	0	0	0	0	0	0	0	0	0	0	0	0	0	0	0	0
OTU_892	k__Bacteria	p__Actinobacteria	c__unidentified_Actinobacteria	o__Micrococcales	f__Microbacteriaceae	g__Amnibacterium	s__	0	0	0	0	0	0	0	0	0	0	0	1	0	0	0	0	0	0	0	0	0	0	0	0	0	0	0	0	0	0	0	0	0	0	0	0	0	0	0	0
OTU_893	k__Bacteria	p__Firmicutes	c__Clostridia	o__Clostridiales	f__Lachnospiraceae	g__unidentified_Lachnospiraceae	s__Trichinella_pseudospiralis	7	6	3	3	23	8	186	19	2	159	0	30	3	517	269	0	9	0	3	72	167	0	0	1146	1	1	7	148	12	0	8	2	104	76	229	1	0	64	109	2
OTU_894	k__Bacteria	p__Firmicutes	c__Clostridia	o__Clostridiales	f__Lachnospiraceae	g__unidentified_Lachnospiraceae	s__Clostridium_sp_L2-50	0	0	0	0	0	0	0	1	0	0	0	0	0	0	0	0	0	0	0	0	0	0	2	0	0	0	0	0	6	0	0	0	0	0	0	0	0	0	0	0
OTU_895	k__Bacteria	p__Firmicutes	c__Clostridia	o__Clostridiales	f__Ruminococcaceae	g__unidentified_Ruminococcaceae	s__Oscillibacter_sp_ER4	0	1	1	0	0	0	0	1	0	0	0	0	0	0	0	0	0	0	0	0	0	0	0	0	0	2	0	2	83	0	0	2	2	0	0	0	0	0	0	0
OTU_896	k__Bacteria	p__Tenericutes	c__Mollicutes	o__	f__	g__	s__	0	0	0	0	0	0	0	0	0	0	0	0	0	0	0	0	0	0	0	0	0	0	0	2	3	0	0	0	2	0	0	0	0	0	0	0	0	0	0	0
OTU_898	k__Bacteria	p__Firmicutes	c__Erysipelotrichia	o__Erysipelotrichales	f__Erysipelotrichaceae	g__Faecalibaculum	s__	0	0	0	0	0	0	0	0	1	1	0	0	0	0	0	0	0	0	1	1	0	0	0	0	0	0	58	0	0	308	0	0	0	0	0	29	134	3	1	1
OTU_899	k__Bacteria	p__Proteobacteria	c__Gammaproteobacteria	o__unidentified_Gammaproteobacteria	f__Burkholderiaceae	Others	Others	0	0	0	0	1	0	0	0	0	0	0	0	0	0	0	0	0	0	2	0	0	0	0	0	0	0	0	0	0	0	3	0	0	0	0	5	0	0	0	0
OTU_900	k__Bacteria	p__Bacteroidetes	c__Bacteroidia	o__Bacteroidales	f__	g__	s__	0	0	0	0	0	34	0	0	0	0	0	0	0	0	0	0	0	0	0	0	0	0	0	0	0	0	0	0	0	0	0	0	0	0	0	0	0	0	0	0
OTU_902	k__Bacteria	p__unidentified_Bacteria	c__unidentified_Bacteria	o__Campylobacterales	f__Helicobacteraceae	g__Helicobacter	Others	74	284	1791	424	111	162	171	195	30	33	656	1834	208	30	690	39	514	38	53	19	88	26	1064	33	68	357	115	466	10	74	31	345	1859	98	1	757	392	413	102	1211
OTU_903	k__Bacteria	p__Tenericutes	c__Mollicutes	o__	f__	g__	s__	2	0	0	4	0	0	4	0	0	0	0	0	0	0	0	9	0	0	2	0	0	0	0	0	3	0	0	2	1	6	0	0	0	0	0	0	0	0	0	5
OTU_904	k__Bacteria	p__Firmicutes	Others	Others	Others	Others	Others	0	0	0	0	0	0	0	0	0	0	0	0	0	0	0	0	0	0	0	0	0	0	0	0	0	0	0	0	2	0	0	0	0	0	0	0	0	0	0	3
OTU_905	k__Bacteria	p__Bacteroidetes	c__Bacteroidia	o__Sphingobacteriales	f__Lentimicrobiaceae	g__Lentimicrobium	s__	0	0	0	0	0	18	0	0	0	0	0	0	0	0	0	0	0	0	0	0	0	0	0	0	0	0	0	0	0	0	0	0	0	0	0	0	0	0	0	0
OTU_906	k__Bacteria	p__Cloacimonetes	c__unidentified_Cloacimonetes	o__unidentified_Cloacimonetes	f__unidentified_Cloacimonetes	g__Candidatus_Cloacimonas	s__	0	0	0	0	1	14	0	0	0	0	0	0	0	0	0	0	0	0	0	0	0	0	0	0	0	0	0	0	0	0	0	0	0	0	0	0	0	0	0	0
OTU_907	k__Bacteria	p__Melainabacteria	c__	o__	f__	g__	s__	11	4	13	0	1	4	0	22	0	4	0	0	0	0	0	0	0	0	31	0	0	0	0	0	0	0	0	0	0	1	0	25	0	4	0	0	0	0	0	0
OTU_908	k__Bacteria	p__Firmicutes	c__Clostridia	o__Clostridiales	Others	Others	Others	0	0	0	0	0	0	1	0	0	0	0	0	0	0	3	0	0	0	0	0	2	0	0	0	0	0	0	0	1	0	0	0	1	0	0	0	0	0	0	0
OTU_909	k__Bacteria	p__Firmicutes	c__Clostridia	o__Clostridiales	f__Ruminococcaceae	Others	Others	55	13	12	16	4	3	18	12	0	4	2	6	14	0	9	25	1	2	26	12	0	0	4	3	1	3	0	1	4	3	4	5	38	28	48	6	16	2	24	1
OTU_910	k__Bacteria	p__Proteobacteria	c__Gammaproteobacteria	o__unidentified_Gammaproteobacteria	f__Burkholderiaceae	g__Oxalobacter	s__	0	0	0	0	0	0	0	0	0	0	0	0	0	0	0	0	0	0	0	0	0	0	0	0	0	0	0	0	31	0	0	0	0	0	0	0	0	0	0	0
OTU_911	k__Bacteria	p__Firmicutes	c__Clostridia	o__Clostridiales	f__Lachnospiraceae	Others	Others	0	25	0	0	2	2	2	5	0	7	4	8	8	15	0	0	0	0	0	0	1	0	0	0	0	0	0	5	0	0	0	19	0	58	0	0	0	3	9	0
OTU_912	k__Bacteria	p__Firmicutes	c__Bacilli	o__Lactobacillales	f__Lactobacillaceae	g__Lactobacillus	Others	1	5	7	5	18	4	0	26	6	14	80	124	105	83	0	88	86	0	15	8	16	109	2	0	243	61	1	29	51	54	2	86	21	10	4	3	0	26	7	35
OTU_913	k__Bacteria	p__Actinobacteria	c__unidentified_Actinobacteria	o__Micrococcales	f__Microbacteriaceae	g__Candidatus_Aquiluna	s__	0	0	0	0	0	0	0	0	0	0	0	0	0	0	0	0	0	0	0	0	0	0	0	0	0	0	0	0	0	0	0	0	0	0	0	0	0	0	0	0
OTU_914	k__Bacteria	p__Firmicutes	c__Clostridia	o__Clostridiales	f__Lachnospiraceae	g__unidentified_Lachnospiraceae	s__Coprococcus_catus	0	0	0	0	0	0	0	4	0	0	0	0	0	0	0	0	0	0	0	0	0	0	2	0	0	0	0	0	7	0	0	0	0	0	0	0	0	0	0	0
OTU_915	k__Bacteria	p__Firmicutes	c__Clostridia	o__Clostridiales	f__Lachnospiraceae	Others	Others	0	3	0	0	3	0	0	0	0	0	0	0	12	1	0	0	5	1	0	0	0	0	0	0	0	0	12	3	36	0	0	1	0	8	0	488	0	0	0	1
OTU_916	k__Bacteria	p__Firmicutes	c__Clostridia	o__Clostridiales	f__Ruminococcaceae	Others	Others	0	0	0	0	0	0	0	0	0	0	0	0	0	0	0	0	0	0	0	0	0	0	0	0	0	0	0	0	12	0	0	0	0	0	0	0	0	0	0	0
OTU_917	k__Bacteria	p__Firmicutes	c__Clostridia	o__Clostridiales	f__Ruminococcaceae	Others	Others	7	0	4	0	0	2	0	8	0	1	1	0	0	2	1	6	1	0	2	0	0	0	0	0	0	0	0	0	0	0	1	0	5	2	4	0	0	0	2	0
OTU_918	k__Bacteria	p__Firmicutes	c__Clostridia	o__Clostridiales	f__Lachnospiraceae	Others	Others	0	0	0	0	0	0	0	0	5	0	2	0	0	0	0	0	3	0	0	0	0	0	0	0	0	0	0	0	0	0	0	0	0	0	0	0	0	0	0	0
OTU_919	k__Bacteria	p__Firmicutes	c__Clostridia	o__Clostridiales	f__Lachnospiraceae	g__Tyzzerella	Others	0	0	0	0	0	0	0	0	0	0	0	0	0	0	0	0	0	0	0	0	0	0	0	0	0	0	0	0	0	0	0	0	0	0	0	0	0	0	0	0
OTU_920	k__Bacteria	p__Firmicutes	c__Clostridia	o__Clostridiales	f__Lachnospiraceae	Others	Others	17	59	16	54	0	2	10	2	0	18	22	3	31	10	4	0	3	0	10	0	2	0	0	47	1	5	18	302	457	77	3	61	341	7	98	29	5	2	0	7
OTU_921	k__Bacteria	p__Firmicutes	c__Clostridia	o__Clostridiales	Others	Others	Others	0	0	0	0	0	0	0	0	0	0	0	0	0	2	0	0	0	0	0	0	0	0	0	0	0	1	0	0	3	1	0	0	0	0	0	0	0	0	0	0
OTU_922	k__Bacteria	p__Firmicutes	c__Erysipelotrichia	o__Erysipelotrichales	f__Erysipelotrichaceae	g__Dubosiella	s__	8	7	1	5	108	152	79	134	1784	453	511	137	21	124	176	2	30	7	154	411	56	29	157	294	1	1107	30	2	0	0	1255	133	76	254	58	40	11	51	253	1
OTU_923	k__Bacteria	p__Tenericutes	c__Mollicutes	o__	f__	g__	s__	0	0	0	0	0	0	0	0	0	0	0	0	0	0	0	2	0	0	0	0	0	0	0	0	0	0	0	0	0	0	0	0	0	0	0	0	0	0	0	0
OTU_924	k__Bacteria	p__Firmicutes	c__Clostridia	o__Clostridiales	f__Lachnospiraceae	Others	Others	4	12	5	4	27	16	2	25	10	21	5	7	122	4	6	144	85	0	2	2	0	1	5	1	32	17	0	333	9	11	18	22	0	50	4	0	10	5	0	5
OTU_925	k__Bacteria	p__Bacteroidetes	c__Bacteroidia	o__Bacteroidales	f__Muribaculaceae	g__	s__	0	0	0	0	1	0	0	19	0	0	0	0	0	0	0	0	13	0	0	0	0	0	0	0	0	1	0	0	0	0	0	0	0	0	0	0	0	0	0	0
OTU_926	k__Bacteria	p__Tenericutes	c__Mollicutes	o__	f__	g__	s__	3	0	4	1	0	0	2	0	0	0	8	0	0	18	0	3	0	0	0	0	0	0	3	11	0	0	0	0	4	0	0	0	0	0	0	0	10	0	3	0
OTU_927	k__Bacteria	p__Actinobacteria	c__unidentified_Actinobacteria	o__Micrococcales	f__Micrococcaceae	g__Micrococcus	s__Micrococcus_luteus	0	0	0	0	0	0	0	0	0	0	0	0	3	0	0	0	0	0	0	0	0	2	1	0	0	0	0	0	0	0	0	1	0	0	0	0	0	0	1	0
OTU_928	k__Bacteria	p__unidentified_Bacteria	c__unidentified_Bacteria	o__Campylobacterales	f__Helicobacteraceae	g__Helicobacter	s__Helicobacter_sp_MIT_01-6451	0	0	0	0	0	0	0	0	0	0	0	0	0	0	0	0	5	0	0	0	0	0	0	0	0	0	0	0	0	0	0	0	0	0	0	0	0	0	0	0
OTU_930	k__Bacteria	p__Firmicutes	c__Clostridia	o__Clostridiales	f__Lachnospiraceae	Others	Others	0	2	0	0	0	0	5	0	0	2	0	0	2	8	2	4	0	0	0	0	0	1	0	1	0	0	0	0	8	4	0	1	0	0	0	7	5	2	0	6
OTU_931	k__Bacteria	p__Actinobacteria	c__unidentified_Actinobacteria	o__Actinomycetales	f__Actinomycetaceae	g__Actinomyces	s__Actinomyces_odontolyticus	0	0	1	0	0	4	0	2	0	0	0	0	0	0	0	0	0	0	0	0	0	0	0	0	0	0	1	0	0	0	0	0	1	0	0	0	0	0	0	6
OTU_932	k__Bacteria	p__Proteobacteria	c__Alphaproteobacteria	o__Rhizobiales	Others	Others	Others	0	0	2	0	0	0	0	0	1	0	0	0	0	0	0	0	0	2	0	0	0	0	0	0	0	0	0	0	1	0	2	0	0	0	0	0	0	0	0	3
OTU_933	k__Bacteria	p__Proteobacteria	c__Gammaproteobacteria	o__unidentified_Gammaproteobacteria	f__Burkholderiaceae	Others	Others	0	1	0	0	0	0	0	0	0	0	0	0	0	0	0	0	0	0	0	0	0	0	0	0	0	0	0	2	0	0	0	0	0	0	0	0	0	0	0	0
OTU_934	k__Bacteria	Others	Others	Others	Others	Others	Others	0	0	0	0	0	33	0	0	0	0	0	0	0	0	0	0	0	0	0	0	0	0	0	0	0	0	0	0	0	0	0	0	0	0	0	0	0	0	0	0
OTU_935	k__Bacteria	p__Firmicutes	c__Clostridia	o__Clostridiales	f__Lachnospiraceae	Others	Others	0	0	0	0	0	0	0	0	0	0	0	0	0	0	0	0	0	0	0	0	0	0	0	0	0	0	0	0	0	0	0	0	0	0	0	0	0	0	0	0
OTU_936	k__Bacteria	p__Firmicutes	c__Clostridia	o__Clostridiales	f__Eubacteriaceae	g__Anaerofustis	s__	0	0	0	0	0	14	0	0	0	0	0	0	0	0	0	0	0	0	0	0	0	0	0	0	0	0	0	0	0	0	0	0	0	0	0	0	0	0	0	0
OTU_937	k__Bacteria	p__Firmicutes	c__Clostridia	o__Clostridiales	f__Ruminococcaceae	g__Pygmaiobacter	s__	0	0	0	0	0	0	4	0	0	0	0	0	0	0	0	0	0	0	0	0	0	0	0	0	0	0	0	0	0	0	0	0	0	0	0	0	0	4	0	0
OTU_938	k__Bacteria	p__Firmicutes	c__Clostridia	o__Clostridiales	f__Lachnospiraceae	g__unidentified_Lachnospiraceae	s__Lachnospiraceae_bacterium_M18-1	1	0	0	0	0	0	1	0	0	5	14	19	6	5	15	0	5	1	0	0	3	1	6	3	3	0	0	10	5	5	13	8	0	4	3	8	0	2	0	4
OTU_939	k__Bacteria	p__Firmicutes	c__Clostridia	o__Clostridiales	f__unidentified_Clostridiales	g__unidentified_Clostridiales	s__Clostridium_bowmanii	0	0	0	0	0	0	0	0	0	0	0	0	0	0	0	0	0	0	0	0	0	0	0	0	0	0	0	0	0	0	0	0	11	0	0	0	0	0	0	0
OTU_940	k__Bacteria	p__Firmicutes	c__Clostridia	o__Clostridiales	f__Ruminococcaceae	g__unidentified_Ruminococcaceae	Others	1	11	0	0	0	0	0	0	0	0	2	0	2	0	0	0	0	0	0	3	0	0	0	0	0	0	0	0	0	8	0	0	0	4	0	32	6	0	2	0
OTU_941	k__Bacteria	p__Firmicutes	c__Bacilli	o__Lactobacillales	f__Streptococcaceae	g__Streptococcus	Others	0	0	3	0	0	0	0	10	0	0	0	0	0	0	0	0	0	0	0	0	0	0	0	0	0	0	0	0	0	0	0	0	0	0	0	0	0	0	0	54
OTU_942	k__Bacteria	p__Bacteroidetes	c__Bacteroidia	o__Bacteroidales	f__Bacteroidaceae	g__Bacteroides	s__Bacteroides_coprophilus	0	0	0	0	0	0	0	0	0	0	0	0	0	0	0	0	0	0	0	0	0	0	0	0	0	0	0	0	0	0	0	0	0	0	0	0	0	0	2	0
OTU_943	k__Bacteria	p__Firmicutes	c__Clostridia	o__Clostridiales	f__Lachnospiraceae	Others	Others	6	2	4	4	2	0	1	1	1	0	0	3	2	2	2	2	1	0	1	2	0	0	2	0	4	0	1	6	10	3	2	3	0	5	0	19	2	4	0	0
OTU_944	k__Bacteria	p__Firmicutes	c__Clostridia	o__Clostridiales	f__Lachnospiraceae	g__Lachnoclostridium	Others	3	34	0	1	4	5	19	11	2	69	25	0	26	13	0	47	3	1	12	1	5	3	2	15	9	5	0	11	10	3	2	26	0	8	4	3	0	63	0	4
OTU_945	k__Bacteria	p__Firmicutes	c__Clostridia	o__Clostridiales	f__unidentified_Clostridiales	g__unidentified_Clostridiales	s__bacterium_LD2013	0	0	0	0	0	0	0	0	0	0	0	0	0	0	0	0	0	0	0	0	0	0	0	0	0	0	0	0	17	0	0	0	0	0	0	0	0	0	0	0
OTU_946	k__Bacteria	p__Firmicutes	c__Clostridia	o__Clostridiales	f__Lachnospiraceae	Others	Others	30	2	1	3	1	8	0	0	0	0	38	0	4	0	0	0	0	0	0	0	0	0	0	0	6	0	0	5	0	0	0	12	19	5	2	0	0	1	0	0
OTU_947	k__Bacteria	p__Tenericutes	c__Mollicutes	Others	Others	Others	Others	0	0	0	0	0	0	0	0	0	0	0	0	0	0	0	0	10	0	0	0	0	0	0	0	0	0	0	0	0	0	0	0	0	0	0	0	0	0	0	0
OTU_948	k__Bacteria	p__Proteobacteria	c__Deltaproteobacteria	o__Desulfuromonadales	f__Geobacteraceae	g__Geobacter	Others	0	0	0	0	0	0	0	3	0	0	0	0	0	0	0	0	0	0	0	0	0	0	0	0	0	0	0	0	0	0	0	0	0	0	0	0	0	0	0	0
OTU_949	k__Bacteria	p__Firmicutes	c__Negativicutes	o__Selenomonadales	f__Acidaminococcaceae	g__Phascolarctobacterium	s__	0	0	0	0	0	0	3	0	0	0	0	0	0	0	0	0	0	0	0	0	0	0	0	0	0	0	0	0	0	0	0	0	0	0	0	0	0	0	0	0
OTU_950	k__Bacteria	p__Firmicutes	c__Erysipelotrichia	o__Erysipelotrichales	f__Erysipelotrichaceae	g__Ileibacterium	s__Ileibacterium_valens	762	1533	872	988	344	579	3	327	756	1257	70	5	8	991	108	5	312	1986	280	2080	963	618	5	1287	3	223	363	1	2	4	549	34	0	967	2	6	1092	1001	1178	0
OTU_951	k__Bacteria	p__Firmicutes	c__Bacilli	o__Lactobacillales	f__Leuconostocaceae	g__Leuconostoc	Others	0	15	0	0	0	0	0	4	0	0	0	0	0	0	0	0	0	0	0	0	0	0	0	0	0	0	0	0	0	0	0	0	1	0	0	0	0	0	0	0
OTU_952	k__Bacteria	p__Firmicutes	c__Clostridia	o__Clostridiales	Others	Others	Others	0	0	2	0	0	0	0	0	7	0	1	0	0	10	51	9	4	5	1	0	3	4	7	0	0	0	1	0	18	0	0	0	0	0	0	0	3	0	0	45
OTU_953	k__Bacteria	p__Firmicutes	c__Bacilli	o__Lactobacillales	f__Lactobacillaceae	g__Lactobacillus	Others	4	14	0	0	2	23	0	6	35	40	11	9	532	17	0	15	5	4	178	27	3	7	0	1	35	13	30	1	18	629	46	27	1	10	0	39	29	5	68	13
OTU_955	k__Bacteria	p__Chloroflexi	c__Anaerolineae	o__Anaerolineales	f__Anaerolineaceae	Others	Others	0	0	0	0	0	17	0	2	0	0	0	0	0	0	0	0	0	0	0	0	0	0	0	0	0	0	2	0	0	0	0	0	0	0	0	0	0	0	0	0
OTU_957	k__Bacteria	p__Firmicutes	c__Clostridia	o__Clostridiales	f__Lachnospiraceae	g__Lachnoclostridium	s__	0	0	0	0	0	0	0	0	0	0	0	0	0	0	0	0	0	0	0	0	0	0	5	0	0	0	0	0	49	0	0	0	1	0	0	0	0	0	0	0
OTU_958	k__Bacteria	p__Firmicutes	c__Clostridia	o__Clostridiales	f__Lachnospiraceae	Others	Others	2	0	0	0	0	0	1	0	0	0	3	0	13	0	2	5	3	0	0	3	0	4	0	0	0	0	3	0	4	1	0	2	0	0	1	0	0	0	1	283
OTU_960	k__Bacteria	Others	Others	Others	Others	Others	Others	0	0	0	0	0	18	0	0	0	0	0	0	0	0	0	0	0	0	0	0	0	0	0	0	0	0	0	0	0	0	0	0	0	0	0	0	0	0	0	0
OTU_961	k__Bacteria	p__Firmicutes	c__Clostridia	o__Clostridiales	f__Christensenellaceae	g__unidentified_Christensenellaceae	s__Clostridium_sp_enrichment_culture_clone_VanCtr93	0	0	0	0	0	10	0	0	0	0	0	0	0	0	0	0	0	0	0	0	0	0	0	0	0	0	0	0	0	0	0	0	0	0	0	0	0	0	0	0
OTU_962	k__Bacteria	p__Firmicutes	c__Clostridia	o__Clostridiales	f__Lachnospiraceae	g__Acetatifactor	s__	3	0	0	4	0	0	15	3	0	0	0	2	0	0	1	0	0	0	0	0	0	0	0	0	0	0	0	3	8	1	0	0	0	0	15	7	0	1	0	0
OTU_963	k__Bacteria	p__Bacteroidetes	c__Bacteroidia	o__Bacteroidales	f__Muribaculaceae	g__	s__	0	0	0	0	0	0	0	4	0	0	3	0	0	0	0	0	0	0	3	2	5	0	6	0	0	0	0	0	0	0	0	0	0	0	2	3	6	4	4	0
OTU_964	k__Bacteria	p__Firmicutes	c__Clostridia	o__Clostridiales	Others	Others	Others	0	0	0	0	0	0	0	0	0	0	0	0	0	0	0	0	0	0	0	0	0	1	0	0	0	0	0	2	0	0	0	0	0	0	0	0	0	0	0	0
OTU_965	k__Archaea	p__Euryarchaeota	c__Thermococci	o__	f__	g__	s__	0	0	0	0	0	27	0	0	0	0	0	0	0	0	0	0	0	0	0	0	0	0	0	0	0	0	0	0	0	0	0	0	0	0	0	0	0	0	0	0
OTU_966	k__Bacteria	p__Firmicutes	c__Clostridia	o__Clostridiales	f__Ruminococcaceae	Others	Others	0	0	0	0	0	0	0	0	8	0	6	3	0	56	0	0	0	65	0	0	0	0	0	0	0	0	0	4	0	0	0	0	0	0	0	0	0	8	0	0
OTU_967	k__Bacteria	p__Firmicutes	c__Clostridia	o__Clostridiales	f__Lachnospiraceae	Others	Others	7	2	5	3	3	0	7	0	1	0	2	0	42	2	3	7	6	6	4	0	0	0	5	5	2	3	4	7	24	0	2	0	2	3	4	1	0	3	0	0
OTU_968	k__Bacteria	p__Bacteroidetes	c__Bacteroidia	o__Sphingobacteriales	f__	g__	s__	0	7	0	0	0	0	0	0	0	0	0	0	0	0	0	0	0	0	0	0	0	0	0	0	0	0	0	0	0	0	0	0	0	0	0	0	0	0	0	0
OTU_969	k__Bacteria	p__Firmicutes	c__Clostridia	o__Clostridiales	f__Ruminococcaceae	g__Intestinimonas	s__	0	0	0	0	0	0	0	0	0	0	0	0	0	0	1	0	0	0	1	0	0	0	0	0	0	0	0	0	0	0	0	0	0	0	0	0	0	0	0	0
OTU_970	k__Bacteria	p__Proteobacteria	c__Gammaproteobacteria	o__Pseudomonadales	f__Moraxellaceae	g__Psychrobacter	Others	0	3	1	0	3	0	0	0	0	0	0	0	0	0	0	0	0	0	0	0	0	0	0	0	6	0	0	0	0	0	0	0	0	0	0	0	0	0	0	0
OTU_972	k__Bacteria	p__Firmicutes	c__Clostridia	o__Clostridiales	Others	Others	Others	0	0	0	0	0	0	0	0	0	0	4	0	0	0	0	0	0	0	0	0	0	0	0	0	0	0	0	0	0	0	0	0	0	0	0	0	0	0	0	0
OTU_973	k__Archaea	p__Thaumarchaeota	c__Nitrososphaeria	o__Nitrososphaerales	f__Nitrososphaeraceae	g__Candidatus_Nitrososphaera	s__	0	14	0	0	0	0	0	0	0	0	0	0	0	0	0	0	0	0	0	0	0	0	0	0	0	0	0	0	0	0	0	0	0	0	0	0	0	0	0	0
OTU_974	k__Bacteria	p__Firmicutes	c__Clostridia	o__Clostridiales	Others	Others	Others	0	0	0	0	0	0	0	0	0	0	0	0	0	0	2	0	3	0	0	0	0	1	0	0	0	0	0	0	0	0	0	0	0	0	0	0	0	0	0	0
OTU_975	k__Bacteria	p__Bacteroidetes	c__Bacteroidia	o__Bacteroidales	f__Prevotellaceae	g__unidentified_Prevotellaceae	s__Prevotella_melaninogenica	0	0	5	4	0	0	0	2	0	0	0	0	0	0	0	0	0	0	4	0	0	0	0	0	0	0	0	0	0	0	0	0	0	0	0	2	0	0	0	0
OTU_977	k__Bacteria	Others	Others	Others	Others	Others	Others	0	0	0	0	0	14	0	0	0	0	0	0	0	0	0	0	0	0	0	0	0	0	0	0	0	0	0	0	0	0	0	0	0	0	0	0	0	0	0	0
OTU_978	k__Bacteria	p__Firmicutes	c__Clostridia	o__Clostridiales	f__Ruminococcaceae	Others	Others	3	0	0	0	0	0	0	4	0	0	19	0	6	12	0	1	3	1	3	1	2	0	5	3	0	0	1	0	2	1	0	4	3	0	2	0	0	0	3	1
OTU_979	k__Bacteria	p__Acidobacteria	c__unidentified_Acidobacteria	o__unidentified_Acidobacteria	f__unidentified_Acidobacteria	g__unidentified_Acidobacteria	s__Aminicenantes_bacterium_clone_OPB95	0	0	0	0	0	20	0	0	0	0	0	0	0	0	0	0	0	0	0	0	0	0	0	0	0	0	0	0	0	0	0	0	0	0	0	0	0	0	0	0
OTU_980	k__Bacteria	p__Firmicutes	c__Clostridia	o__Clostridiales	f__Ruminococcaceae	Others	Others	0	1	0	0	0	0	2	3	0	0	0	0	7	6	0	0	1	3	0	0	0	3	5	10	0	0	0	0	0	0	0	0	0	0	5	0	0	0	0	5
OTU_981	k__Bacteria	p__Firmicutes	c__Clostridia	o__	f__	g__	s__	0	0	0	0	0	41	0	0	0	0	0	0	0	0	0	0	0	0	0	0	0	0	0	0	0	0	0	0	0	0	0	0	0	0	0	0	0	0	0	0
OTU_983	k__Bacteria	p__Firmicutes	c__Bacilli	o__Lactobacillales	f__Carnobacteriaceae	g__Atopostipes	s__	0	0	0	0	0	0	0	0	0	0	0	0	0	2	0	0	0	0	0	0	0	0	0	0	3	0	0	0	0	0	0	0	0	0	0	0	0	0	0	0
OTU_984	k__Bacteria	p__Firmicutes	c__Clostridia	o__Clostridiales	f__Lachnospiraceae	g__unidentified_Lachnospiraceae	s__Lachnospiraceae_bacterium_10-1	14	10	4	15	0	3	52	1	8	0	7	0	8	0	0	0	11	0	0	1	19	11	1	6	0	0	0	2	10	0	0	16	4	22	13	0	5	0	5	0
OTU_986	k__Bacteria	p__Actinobacteria	c__Coriobacteriia	o__Coriobacteriales	f__Eggerthellaceae	g__Eggerthella	s__	0	0	0	0	0	0	0	0	0	0	0	0	0	0	0	0	0	0	0	0	0	0	1	0	0	0	0	0	0	0	0	0	0	0	0	0	0	0	0	0
OTU_987	k__Bacteria	p__Firmicutes	c__Erysipelotrichia	o__Erysipelotrichales	f__Erysipelotrichaceae	g__Dubosiella	s__	0	0	2	2	4	5	0	2	58	12	4	5	1	3	2	0	0	0	3	8	0	1	4	5	0	23	0	0	0	0	37	2	4	8	2	1	0	1	6	0
OTU_988	k__Bacteria	p__unidentified_Bacteria	c__unidentified_Bacteria	o__Campylobacterales	f__unidentified_Campylobacterales	g__Arcobacter	Others	0	0	0	0	0	19	0	0	0	0	0	0	0	0	0	0	0	0	0	0	0	0	0	0	0	0	0	0	0	0	0	0	0	0	0	0	0	0	0	0
OTU_989	k__Bacteria	p__Proteobacteria	c__Deltaproteobacteria	o__Myxococcales	f__Haliangiaceae	g__Haliangium	s__	0	6	0	0	0	0	0	0	0	0	0	0	0	0	0	0	0	0	0	0	0	0	0	0	0	0	0	1	0	0	0	0	0	0	0	0	0	2	0	0
OTU_990	k__Bacteria	p__Firmicutes	c__Bacilli	o__Lactobacillales	f__Lactobacillaceae	g__Lactobacillus	s__Lactobacillus_algidus	3	1	1	0	0	0	0	0	0	6	0	0	0	0	0	0	0	0	0	0	23	0	0	0	0	0	0	0	0	0	0	0	1	0	0	0	0	0	0	0
OTU_991	k__Bacteria	p__Firmicutes	c__Clostridia	o__	f__	g__	s__	0	0	0	0	0	16	0	0	0	0	0	0	0	0	0	0	0	0	0	0	0	0	0	0	0	0	0	0	0	0	0	0	0	0	0	0	0	0	0	0
OTU_992	k__Bacteria	p__Firmicutes	c__Clostridia	o__	f__	g__	s__	0	0	0	0	0	12	0	0	0	0	0	0	0	0	0	0	0	0	0	0	0	0	0	0	0	0	0	0	0	0	0	0	0	0	0	0	0	0	0	0
OTU_993	k__Bacteria	p__Proteobacteria	c__Alphaproteobacteria	o__Rhodobacterales	f__Rhodobacteraceae	Others	Others	0	0	0	0	0	0	0	0	0	0	0	0	0	0	0	0	0	0	1	0	0	0	2	0	0	0	0	0	0	0	1	0	10	0	0	0	0	0	0	0
OTU_994	k__Bacteria	Others	Others	Others	Others	Others	Others	0	14	0	0	0	0	0	0	0	0	0	0	0	0	0	0	0	0	0	0	0	0	0	0	0	0	0	0	0	0	0	0	0	0	0	0	0	0	0	0
OTU_995	k__Bacteria	p__Firmicutes	c__Bacilli	o__Bacillales	Others	Others	Others	0	41	0	0	0	0	0	5	0	0	0	3	0	0	0	0	0	0	0	0	0	0	1	0	4	0	0	0	0	0	0	0	0	0	0	0	0	0	12	0
OTU_996	k__Bacteria	p__Firmicutes	c__Clostridia	o__Clostridiales	f__Lachnospiraceae	Others	Others	0	0	0	0	0	0	2	0	0	0	0	0	1	0	0	0	0	0	0	0	0	0	0	0	0	0	0	0	0	0	0	0	0	0	0	0	0	0	0	0
OTU_997	k__Bacteria	p__Firmicutes	c__Clostridia	o__Clostridiales	f__Ruminococcaceae	Others	Others	0	7	0	0	0	0	0	0	0	0	0	0	0	0	0	0	0	0	0	0	0	0	0	0	0	0	0	0	0	0	0	0	0	0	0	0	0	0	0	0
OTU_998	k__Bacteria	p__Gemmatimonadetes	c__Longimicrobia	o__Longimicrobiales	f__Longimicrobiaceae	g__	s__	0	13	0	0	0	0	0	0	0	0	0	0	0	0	0	0	0	0	0	0	0	0	0	0	0	0	0	0	0	0	0	0	0	0	0	0	0	0	0	0
OTU_999	k__Bacteria	p__Firmicutes	c__Erysipelotrichia	o__Erysipelotrichales	f__Erysipelotrichaceae	g__Dubosiella	s__	68	18	80	27	323	394	283	143	29	636	305	123	4	72	4	307	114	26	212	59	121	72	102	129	3	46	17	49	60	14	24	7	4	443	0	406	130	69	54	133
OTU_1000	k__Bacteria	p__Tenericutes	c__Mollicutes	o__	f__	g__	s__	0	0	0	0	0	0	0	0	0	0	0	0	0	0	0	11	0	0	0	0	0	0	0	0	0	4	5	0	0	0	0	0	0	0	0	0	0	0	0	0
OTU_1001	k__Bacteria	p__Actinobacteria	c__unidentified_Actinobacteria	o__Corynebacteriales	f__Nocardiaceae	g__Rhodococcus	s__Rhodococcus_erythropolis	0	0	0	0	0	3	0	0	0	0	0	3	0	0	0	0	0	0	0	0	0	0	0	0	0	0	0	0	3	0	0	0	0	0	0	0	0	0	0	1
OTU_1002	k__Bacteria	p__Bacteroidetes	c__Rhodothermia	o__Rhodothermales	f__Rhodothermaceae	g__	s__	0	5	0	0	0	0	0	0	0	0	0	0	0	0	0	0	0	0	0	0	0	0	0	0	0	0	0	0	0	0	0	0	0	0	0	0	0	0	0	0
OTU_1003	k__Bacteria	p__Firmicutes	c__Clostridia	o__Clostridiales	f__Ruminococcaceae	g__unidentified_Ruminococcaceae	s__[Clostridium]_papyrosolvens	0	5	11	0	0	0	17	0	9	2	74	0	0	0	0	0	0	39	259	1	0	28	2	31	0	0	0	0	3	0	3	0	0	0	17	88	0	3	0	363
OTU_1004	k__Bacteria	p__Bacteroidetes	c__Bacteroidia	o__Bacteroidales	f__Prevotellaceae	g__Alloprevotella	s__	0	0	0	0	0	0	0	3	0	0	0	0	0	0	0	0	7	0	0	0	0	0	0	0	0	0	0	0	0	0	0	0	0	0	0	0	0	0	0	0
OTU_1006	k__Bacteria	p__Firmicutes	c__Clostridia	o__Clostridiales	f__Ruminococcaceae	g__unidentified_Ruminococcaceae	Others	0	0	0	0	0	0	3	0	0	0	0	0	1	1	0	0	1	0	0	0	0	0	0	0	0	0	0	0	2	0	0	0	0	0	1	5	0	0	0	2
OTU_1007	k__Bacteria	p__Firmicutes	c__Clostridia	Others	Others	Others	Others	0	0	0	0	0	0	0	0	0	0	0	0	0	0	0	0	0	0	0	0	0	0	0	0	0	0	0	0	0	0	0	0	0	0	0	0	0	0	0	0
OTU_1009	k__Bacteria	p__Firmicutes	c__Clostridia	o__Clostridiales	f__Lachnospiraceae	g__Roseburia	s__	0	0	0	0	0	0	0	0	0	0	0	0	0	0	0	0	0	0	0	0	0	0	0	0	0	0	0	0	2	0	0	0	0	0	0	0	0	0	0	0
OTU_1010	k__Bacteria	p__Actinobacteria	c__unidentified_Actinobacteria	o__Corynebacteriales	f__Dietziaceae	g__Dietzia	Others	0	0	0	0	0	0	0	0	0	0	0	0	0	0	0	0	0	0	0	0	0	0	0	0	0	0	0	0	0	0	0	0	0	0	0	0	0	0	0	0
OTU_1012	k__Bacteria	p__Actinobacteria	c__Thermoleophilia	o__Gaiellales	f__	g__	s__	0	0	0	0	0	13	0	0	0	0	0	0	0	0	0	0	0	0	0	0	0	0	0	0	0	0	0	0	0	0	0	0	0	0	0	0	0	2	0	0
OTU_1013	k__Bacteria	p__Firmicutes	c__Clostridia	o__Clostridiales	f__Ruminococcaceae	Others	Others	0	0	8	0	1	0	1	0	0	3	0	0	0	2	18	2	0	4	0	2	0	18	15	0	0	3	3	1	15	0	2	6	12	0	28	3	0	1	8	5
OTU_1014	k__Bacteria	p__Firmicutes	c__Clostridia	o__Clostridiales	f__Lachnospiraceae	Others	Others	0	4	0	0	0	0	0	1	0	0	3	0	0	1	0	0	0	0	0	0	0	0	4	1	0	0	0	0	0	0	0	0	0	0	0	0	0	0	0	0
OTU_1015	k__Bacteria	p__Proteobacteria	c__Gammaproteobacteria	o__Pseudomonadales	f__Moraxellaceae	g__Enhydrobacter	s__Moraxella_osloensis	0	4	0	0	0	0	0	0	0	0	0	0	0	0	0	0	0	0	0	0	0	1	0	0	0	0	2	0	0	0	0	1	0	0	0	0	0	0	0	0
OTU_1016	k__Bacteria	p__Firmicutes	c__Clostridia	o__Clostridiales	f__Lachnospiraceae	Others	Others	0	0	0	0	0	0	0	0	0	0	0	0	0	0	0	0	0	0	0	0	0	0	0	0	0	0	0	0	0	0	2	0	0	0	0	0	0	0	0	0
OTU_1018	k__Bacteria	p__Proteobacteria	c__Deltaproteobacteria	o__Myxococcales	f__Polyangiaceae	g__Pajaroellobacter	s__	0	0	0	0	0	0	0	0	0	0	0	0	0	0	0	0	0	0	2	0	0	0	0	0	0	0	0	0	0	0	0	1	0	0	0	0	0	0	0	0
OTU_1019	k__Bacteria	p__Bacteroidetes	c__Bacteroidia	o__Bacteroidales	f__Prevotellaceae	g__unidentified_Prevotellaceae	Others	0	4	0	0	0	0	0	0	0	0	0	1	0	0	0	0	1	0	0	0	0	0	0	0	0	0	1	0	37	0	0	0	0	0	0	1	0	0	0	0
OTU_1020	k__Bacteria	p__Firmicutes	c__Clostridia	o__Clostridiales	f__unidentified_Clostridiales	g__unidentified_Clostridiales	Others	0	0	0	0	0	0	0	0	0	0	0	0	0	0	0	3	0	0	0	0	0	0	0	0	0	0	0	0	0	0	0	0	0	0	0	0	0	0	0	0
OTU_1021	k__Bacteria	p__Proteobacteria	c__Alphaproteobacteria	o__Micropepsales	f__Micropepsaceae	Others	Others	0	8	0	0	0	0	0	0	0	0	0	0	0	0	0	0	0	0	0	0	0	0	0	0	0	0	0	0	0	0	0	0	0	0	0	0	0	0	0	0
OTU_1023	k__Bacteria	p__Tenericutes	c__Mollicutes	o__Mycoplasmatales	f__Mycoplasmataceae	g__Candidatus_Lumbricincola	s__	0	0	0	0	0	0	0	0	0	0	0	9	0	0	0	0	0	0	0	0	0	0	0	0	0	0	0	0	0	0	0	0	0	0	0	0	0	0	0	0
OTU_1024	k__Bacteria	p__Firmicutes	c__Clostridia	o__Clostridiales	f__Ruminococcaceae	Others	Others	0	0	0	1	0	0	0	0	0	0	0	0	0	0	0	0	0	0	0	0	0	0	0	0	0	0	0	0	0	0	0	0	0	0	0	0	0	0	0	0
OTU_1025	k__Bacteria	p__Firmicutes	c__Clostridia	o__Clostridiales	f__Lachnospiraceae	Others	Others	0	0	0	0	0	0	0	0	0	0	4	0	94	3	0	0	0	0	0	0	0	0	0	7	0	0	0	0	0	0	0	0	0	0	0	0	1	2	0	24
OTU_1026	k__Bacteria	p__Actinobacteria	c__unidentified_Actinobacteria	o__unidentified_Actinobacteria	f__unidentified_Actinobacteria	g__unidentified_Actinobacteria	s__bacterium_rJ7	0	0	0	0	0	0	0	0	0	0	0	0	0	0	0	0	0	0	0	0	0	0	0	0	0	0	0	0	0	0	0	0	0	0	0	0	0	0	0	0
OTU_1027	k__Bacteria	p__Firmicutes	c__Clostridia	o__Clostridiales	Others	Others	Others	0	0	0	0	0	0	0	0	0	0	0	0	0	0	0	0	0	0	0	0	0	0	0	0	0	0	0	0	0	0	0	0	0	0	3	0	0	0	0	5
OTU_1028	k__Bacteria	p__Verrucomicrobia	c__Verrucomicrobiae	o__Verrucomicrobiales	f__Akkermansiaceae	g__Akkermansia	s__Akkermansia_muciniphila	0	0	5	0	0	0	12	114	2	0	432	8	0	0	0	0	2	0	0	0	42	10	30	0	0	127	13	67	1	0	7	0	16	0	0	0	26	4	0	0
OTU_1029	k__Bacteria	p__Actinobacteria	c__Coriobacteriia	o__Coriobacteriales	f__Eggerthellaceae	g__Enterorhabdus	Others	2	24	0	0	8	4	2	0	5	5	17	2	36	2	1	14	0	3	9	10	0	4	1	0	0	7	12	3	4	203	16	5	0	1	0	8	50	6	10	5
OTU_1030	k__Bacteria	p__Firmicutes	c__Clostridia	o__Clostridiales	f__Lachnospiraceae	Others	Others	14	0	32	8	288	113	60	56	6	2	55	5	2	2	152	379	30	106	2	0	51	17	1	20	2	20	2	990	273	20	0	372	0	2	1	23	0	6	0	33
OTU_1033	k__Bacteria	p__Firmicutes	Others	Others	Others	Others	Others	0	0	0	0	0	0	0	0	0	0	0	0	0	0	0	0	0	0	0	0	0	0	0	0	0	0	0	0	3	0	0	0	0	0	0	0	0	0	0	0
OTU_1034	k__Bacteria	p__Proteobacteria	c__Deltaproteobacteria	o__Desulfuromonadales	f__Geobacteraceae	g__Geobacter	Others	0	0	0	0	0	8	0	0	0	0	0	0	0	0	0	0	0	0	0	0	0	0	0	0	0	0	0	0	0	0	0	0	0	0	0	0	0	0	0	0
OTU_1035	k__Bacteria	p__Proteobacteria	c__Deltaproteobacteria	o__unidentified_Deltaproteobacteria	f__Syntrophorhabdaceae	g__Syntrophorhabdus	s__	0	0	0	0	0	10	0	0	0	0	0	0	0	0	0	0	0	0	0	0	0	0	0	0	0	0	0	0	0	0	0	0	0	0	0	0	0	0	0	0
OTU_1036	k__Bacteria	p__Bacteroidetes	c__Bacteroidia	o__Bacteroidales	f__Muribaculaceae	g__	s__	0	0	0	0	0	0	0	9	0	0	0	0	0	0	7	0	2	0	0	0	4	0	0	0	0	0	0	0	0	0	0	0	0	0	0	0	0	0	0	0
OTU_1037	k__Bacteria	p__Firmicutes	c__Bacilli	o__Lactobacillales	f__Lactobacillaceae	g__Lactobacillus	Others	4	5	16	3	56	39	19	63	52	96	307	266	49	330	65	148	43	11	76	50	59	198	154	26	72	94	635	175	322	542	112	1653	73	89	8	6	27	76	38	176
OTU_1038	k__Bacteria	p__Firmicutes	c__Clostridia	o__Clostridiales	f__Ruminococcaceae	g__Candidatus_Soleaferrea	Others	0	0	0	0	0	0	0	0	0	0	0	0	0	0	0	0	0	0	0	0	0	0	0	0	0	0	0	0	0	0	1	1	0	0	0	0	0	0	0	0
OTU_1039	k__Bacteria	p__Proteobacteria	c__Gammaproteobacteria	o__unidentified_Gammaproteobacteria	f__Burkholderiaceae	Others	Others	0	0	0	0	0	0	0	0	0	0	0	0	0	6	0	1	1	0	0	0	0	64	0	4	1	0	0	5	0	0	0	13	0	0	0	0	0	2	6	0
OTU_1040	k__Bacteria	p__Firmicutes	c__Clostridia	o__Clostridiales	f__Lachnospiraceae	g__unidentified_Lachnospiraceae	s__Lachnospiraceae_bacterium_10-1	105	32	21	81	2	3	186	3	1	2	47	3	34	29	2	0	51	2	0	0	63	24	2	4	0	3	3	2	33	1	0	138	14	42	49	0	74	0	1	4
OTU_1042	k__Bacteria	p__Firmicutes	c__Clostridia	o__Clostridiales	f__Ruminococcaceae	Others	Others	0	0	0	0	0	0	93	4	23	2	8	24	0	212	6	0	8	224	0	0	2	3	0	392	0	4	3	0	0	0	14	0	0	0	19	0	0	48	0	0
OTU_1043	k__Bacteria	p__Firmicutes	c__Erysipelotrichia	o__Erysipelotrichales	f__Erysipelotrichaceae	g__Ileibacterium	s__Ileibacterium_valens	7	6	7	6	3	2	0	1	2	5	1	0	0	7	0	0	2	6	2	6	7	8	0	0	0	1	0	0	0	0	0	0	0	4	0	0	0	7	4	0
OTU_1044	k__Bacteria	p__Firmicutes	c__Clostridia	o__Clostridiales	f__Lachnospiraceae	Others	Others	1	1	0	3	3	0	2	6	2	1	3	0	79	13	22	1	5	3	3	0	1	2	0	1	172	9	54	19	20	7	47	38	4	17	0	142	0	24	4	6
OTU_1045	k__Bacteria	p__Proteobacteria	c__Deltaproteobacteria	o__Syntrophobacterales	f__Syntrophaceae	Others	Others	0	0	0	0	0	13	0	0	0	0	0	0	0	0	0	0	0	0	0	0	0	0	0	0	0	0	0	0	0	0	0	0	0	0	0	0	0	0	0	0
OTU_1046	k__Bacteria	p__Cloacimonetes	Others	Others	Others	Others	Others	0	0	0	0	0	13	0	0	0	0	0	0	0	0	0	0	0	0	0	0	0	0	0	0	0	0	0	0	0	0	0	0	0	0	0	0	0	0	0	0
OTU_1047	k__Bacteria	p__Firmicutes	c__Clostridia	o__Clostridiales	f__Gracilibacteraceae	g__Lutispora	s__	0	0	0	0	0	9	0	0	0	0	0	0	0	0	0	0	0	0	0	0	0	0	0	0	0	0	0	0	0	0	0	0	0	0	0	0	0	0	0	0
OTU_1048	k__Bacteria	p__Proteobacteria	c__Alphaproteobacteria	o__Sphingomonadales	f__Sphingomonadaceae	g__Novosphingobium	s__Novosphingobium_resinovorum	0	0	0	0	0	0	0	0	0	0	0	0	0	0	0	0	0	0	0	0	0	0	0	0	0	0	0	0	0	0	0	0	3	0	0	0	0	0	0	0
OTU_1049	k__Bacteria	p__Firmicutes	c__Clostridia	o__Clostridiales	f__Ruminococcaceae	Others	Others	0	0	0	0	0	0	3	0	0	0	0	0	0	2	6	9	0	0	0	3	0	0	0	0	0	0	0	20	2	0	0	0	0	0	17	0	0	0	0	0
OTU_1051	k__Bacteria	p__Firmicutes	c__Clostridia	o__Clostridiales	f__Christensenellaceae	Others	Others	0	0	0	0	0	13	0	0	0	0	0	0	0	0	0	0	0	0	0	0	0	0	0	0	0	0	0	0	0	0	0	0	0	0	0	0	0	0	0	0
OTU_1052	k__Bacteria	p__Firmicutes	c__Erysipelotrichia	o__Erysipelotrichales	f__Erysipelotrichaceae	Others	Others	35	0	2	21	20	10	14	3	9	24	10	8	53	98	0	3	7	3	0	59	3	0	8	14	27	5	0	3	51	0	13	13	4	1	0	0	0	9	183	93
OTU_1053	k__Bacteria	p__Firmicutes	c__Clostridia	o__Clostridiales	f__Ruminococcaceae	Others	Others	0	0	0	0	0	0	0	3	0	0	8	0	0	5	2	0	1	0	3	0	2	1	3	1	2	0	0	0	0	0	0	0	0	0	2	0	0	0	0	3
OTU_1054	k__Bacteria	p__Firmicutes	c__Clostridia	o__Clostridiales	f__Lachnospiraceae	Others	Others	0	1	0	0	0	0	0	0	0	0	0	0	0	0	0	0	0	0	0	0	0	0	0	0	0	0	0	0	5	0	0	0	0	0	0	0	0	0	0	0
OTU_1055	k__Bacteria	p__Bacteroidetes	c__Bacteroidia	o__Bacteroidales	Others	Others	Others	0	0	0	0	0	0	0	0	0	0	0	0	0	0	0	0	6	0	0	0	0	0	0	0	0	0	0	0	0	0	0	0	0	0	0	0	0	0	0	0
OTU_1056	k__Bacteria	p__Firmicutes	c__Clostridia	o__Clostridiales	f__Lachnospiraceae	Others	Others	0	0	0	1	0	0	0	0	0	0	1	0	0	0	0	0	3	0	0	0	0	0	0	0	0	0	0	0	0	0	0	0	0	0	0	0	0	0	0	0
OTU_1057	k__Bacteria	p__Proteobacteria	c__Alphaproteobacteria	o__Caulobacterales	f__Caulobacteraceae	g__Brevundimonas	Others	0	0	0	0	0	0	0	0	0	0	2	0	3	0	0	0	0	0	0	0	0	0	0	0	0	0	0	0	0	0	0	0	0	0	0	0	0	0	10	0
OTU_1058	k__Bacteria	p__Bacteroidetes	c__Bacteroidia	o__Flavobacteriales	f__unidentified_Flavobacteriales	g__Chryseobacterium	Others	0	11	0	0	0	0	0	0	0	0	0	0	0	0	0	0	0	0	0	0	0	0	0	0	0	0	0	0	0	0	0	0	0	0	0	0	0	0	0	0
OTU_1059	k__Bacteria	p__Bacteroidetes	c__Bacteroidia	o__Bacteroidales	f__Tannerellaceae	g__Macellibacteroides	Others	0	0	0	0	0	11	0	0	0	0	0	0	0	0	0	0	0	0	0	0	0	2	0	0	0	0	0	0	0	0	0	0	0	0	0	0	0	0	0	0
OTU_1060	k__Bacteria	p__Proteobacteria	c__Gammaproteobacteria	o__Xanthomonadales	f__Rhodanobacteraceae	g__Rhodanobacter	s__Rhodanobacter_sp	0	0	0	0	0	0	0	0	0	0	0	0	0	0	0	0	0	0	0	0	0	0	1	0	0	0	0	0	0	0	0	0	9	0	0	0	0	0	0	0
OTU_1061	k__Bacteria	p__Proteobacteria	c__Gammaproteobacteria	o__Oceanospirillales	f__unidentified_Oceanospirillales	g__Marinomonas	Others	0	0	0	0	0	0	0	0	0	0	0	0	0	0	0	0	0	0	0	0	0	4	0	0	0	0	0	0	0	0	0	0	0	0	0	0	0	0	0	0
OTU_1062	k__Bacteria	p__Firmicutes	c__Clostridia	o__Clostridiales	Others	Others	Others	0	0	0	0	0	0	0	0	0	0	0	0	0	0	0	0	0	0	0	0	0	0	0	0	0	0	0	0	0	0	0	0	0	0	0	0	13	0	0	0
OTU_1063	k__Bacteria	p__Firmicutes	c__Erysipelotrichia	o__Erysipelotrichales	f__Erysipelotrichaceae	g__unidentified_Erysipelotrichaceae	s__[Clostridium]_innocuum	0	0	0	0	0	0	0	1	0	0	0	0	0	0	0	0	0	0	0	0	0	0	0	0	0	0	0	0	0	0	0	0	1	0	0	0	0	0	0	0
OTU_1064	k__Bacteria	p__Firmicutes	c__Erysipelotrichia	o__Erysipelotrichales	f__Erysipelotrichaceae	g__Dubosiella	s__	40	69	26	55	144	215	361	175	2337	621	2492	1747	17	147	674	7	344	9	257	448	481	379	579	168	3	1446	127	11	0	7	1760	169	621	315	502	357	36	75	296	47
OTU_1066	k__Bacteria	p__Firmicutes	c__Clostridia	o__Clostridiales	f__Ruminococcaceae	g__unidentified_Ruminococcaceae	s__Carnobacterium_sp_N15MGS-251	0	0	0	0	0	0	0	2	0	0	0	0	0	0	0	0	0	0	0	0	0	0	0	0	0	0	0	0	0	0	0	0	0	0	0	0	0	0	0	0
OTU_1067	k__Bacteria	Others	Others	Others	Others	Others	Others	0	0	0	0	0	5	0	0	0	0	0	0	0	0	0	0	0	0	0	0	0	0	0	0	0	0	0	0	0	0	0	0	0	0	0	0	0	0	0	0
OTU_1068	k__Bacteria	p__Actinobacteria	c__unidentified_Actinobacteria	o__Propionibacteriales	f__Propionibacteriaceae	g__Cutibacterium	Others	0	0	0	0	0	0	0	0	0	0	0	0	0	0	0	0	0	0	0	0	0	0	2	0	0	0	0	0	0	0	0	0	0	0	0	0	0	0	7	0
OTU_1069	k__Bacteria	p__Firmicutes	c__Clostridia	o__Clostridiales	f__Lachnospiraceae	g__Roseburia	Others	0	0	0	0	2	1	13	0	31	0	45	0	313	0	0	6	0	0	0	0	0	0	21	2	0	35	0	0	6	0	0	0	0	0	0	0	0	0	0	0
OTU_1070	k__Bacteria	p__Firmicutes	c__Clostridia	o__Clostridiales	f__Lachnospiraceae	g__Lachnoclostridium	s__	80	8	6	17	4	2	5	5	0	1	13	47	21	1	4	6	9	1	4	9	0	2	7	24	2	4	0	6	5	0	3	17	4	7	114	0	0	7	8	13
OTU_1071	k__Bacteria	p__Proteobacteria	c__Alphaproteobacteria	o__Rhodobacterales	f__Rhodobacteraceae	Others	Others	0	0	1	0	0	0	0	0	0	0	0	0	0	0	0	0	0	0	0	0	0	0	0	0	0	0	0	0	0	0	0	4	0	0	0	0	0	0	0	0
OTU_1072	k__Bacteria	p__Proteobacteria	c__Gammaproteobacteria	o__Pseudomonadales	f__Moraxellaceae	g__Acinetobacter	Others	0	9	0	0	0	0	0	1	0	0	0	0	0	0	0	0	0	0	0	0	0	1	0	0	0	0	0	0	0	0	0	0	0	0	0	0	0	0	0	0
OTU_1073	k__Bacteria	p__Firmicutes	c__Clostridia	o__Clostridiales	f__Ruminococcaceae	g__unidentified_Ruminococcaceae	Others	4	3	0	0	1	0	0	1	0	0	0	0	2	5	0	3	0	0	0	2	0	0	0	5	0	0	0	0	0	1	0	3	0	7	0	4	4	2	3	1
OTU_1074	k__Bacteria	p__Firmicutes	c__Bacilli	o__Bacillales	f__Staphylococcaceae	g__Staphylococcus	Others	0	14	1	0	0	0	0	0	0	7	9	4	15	1	0	1	1	0	10	1	0	7	9	0	7	0	1	4	1	21	2	5	2	0	1	0	0	2	3	1
OTU_1075	k__Bacteria	p__Actinobacteria	c__Thermoleophilia	o__Gaiellales	f__Gaiellaceae	g__Gaiella	s__actinobacterium_WWH12	0	7	0	0	0	0	0	0	0	0	0	0	0	0	0	0	0	0	0	0	0	0	0	0	0	0	0	0	0	0	0	0	0	0	0	0	0	0	0	0
OTU_1076	k__Bacteria	p__Firmicutes	c__Negativicutes	o__Selenomonadales	f__Veillonellaceae	g__Mitsuokella	Others	0	0	0	0	0	0	0	0	1	0	0	0	0	0	0	0	0	0	0	0	0	0	0	0	0	0	0	0	0	0	0	0	0	0	0	0	0	0	0	0
OTU_1077	k__Bacteria	p__Melainabacteria	c__unidentified_Melainabacteria	o__unidentified_Melainabacteria	f__unidentified_Melainabacteria	g__unidentified_Melainabacteria	s__Candidatus_Gastranaerophilales_bacterium_Zag_111	0	0	0	0	0	0	0	1	0	0	0	0	0	0	0	0	0	0	0	0	0	0	0	0	0	0	0	0	0	0	0	0	0	0	0	0	0	0	0	0
OTU_1078	k__Bacteria	p__Tenericutes	c__Mollicutes	o__	f__	g__	s__	0	0	0	0	0	0	0	0	0	0	0	0	0	0	0	1	0	0	0	0	0	0	0	0	0	3	0	0	12	0	0	0	0	0	0	0	0	0	0	20
OTU_1079	k__Bacteria	p__Bacteroidetes	c__Bacteroidia	o__Bacteroidales	f__Bacteroidaceae	g__Bacteroides	s__Bacteroides_stercoris	0	0	0	0	0	0	0	21	0	0	0	0	0	0	0	4	0	0	0	0	0	0	4	0	0	2	0	0	0	1	2	0	2	0	0	0	4	0	0	0
OTU_1080	k__Bacteria	p__Bacteroidetes	c__Bacteroidia	o__Bacteroidales	f__Bacteroidaceae	g__Bacteroides	s__Bacteroides_caccae	0	0	0	0	0	0	0	0	0	0	0	0	3	0	0	0	0	0	1	0	0	0	12	0	0	0	0	0	9	0	0	2	4	0	0	0	0	0	0	0
OTU_1081	k__Bacteria	p__Firmicutes	c__Clostridia	o__Clostridiales	f__Lachnospiraceae	Others	Others	0	0	1	0	0	0	0	0	0	0	0	0	0	0	0	0	0	0	0	0	0	0	0	2	0	0	0	0	0	0	0	0	0	0	0	0	0	0	0	0
OTU_1082	k__Bacteria	p__Firmicutes	c__Clostridia	o__Clostridiales	f__Ruminococcaceae	g__unidentified_Ruminococcaceae	Others	2	0	0	0	0	0	0	0	0	31	12	0	0	0	1	15	0	0	0	6	0	0	0	0	188	0	0	0	0	0	0	1	0	0	7	0	0	13	19	0
OTU_1083	k__Bacteria	p__Firmicutes	c__Clostridia	o__Clostridiales	f__Ruminococcaceae	g__unidentified_Ruminococcaceae	s__rumen_bacterium_NK4A214	0	0	0	0	0	0	0	0	0	0	0	0	0	0	0	0	10	0	0	0	0	0	0	0	0	0	0	0	11	0	0	0	0	0	0	0	0	0	0	0
OTU_1084	k__Bacteria	p__Proteobacteria	c__Alphaproteobacteria	o__Rhizobiales	f__Beijerinckiaceae	g__Bosea	s__	1	0	0	0	0	0	0	0	0	0	0	2	0	0	0	0	0	0	0	0	0	0	0	0	0	0	4	0	0	1	0	0	0	0	0	0	0	0	0	0
OTU_1085	k__Bacteria	p__Bacteroidetes	c__Bacteroidia	o__Bacteroidales	f__Prevotellaceae	g__Alloprevotella	s__Prevotella_sp	0	0	0	0	0	0	0	0	0	0	0	0	3	0	0	0	0	0	0	0	0	0	1	0	0	0	0	0	0	0	0	0	0	0	0	0	0	0	0	0
OTU_1087	k__Bacteria	p__Firmicutes	c__Clostridia	o__Clostridiales	f__Lachnospiraceae	g__Blautia	s__Lachnospiraceae_bacterium_DW59	0	0	0	0	1	0	0	0	0	0	1	0	5	0	0	0	0	4	0	9	0	0	0	0	2	3	0	15	2	0	0	0	0	10	0	0	4	3	3	0
OTU_1088	k__Bacteria	p__Firmicutes	c__Clostridia	o__Clostridiales	f__Ruminococcaceae	Others	Others	0	0	0	0	0	9	0	0	0	0	0	0	0	0	0	0	0	0	0	0	0	0	0	0	0	0	0	0	0	0	0	0	0	0	0	0	0	0	0	0
OTU_1089	k__Bacteria	p__Firmicutes	c__Bacilli	o__Lactobacillales	f__Lactobacillaceae	g__Lactobacillus	Others	0	0	0	0	0	0	0	0	0	1	5	2	2	1	0	4	0	0	0	0	0	0	2	2	1	0	1099	0	0	150	0	7	0	0	0	1	5	0	0	1
OTU_1090	k__Bacteria	p__Proteobacteria	c__Gammaproteobacteria	o__Orbales	f__Orbaceae	g__Gilliamella	Others	0	0	0	0	0	0	0	1	0	0	0	0	0	0	0	0	0	0	0	0	0	0	0	0	0	0	0	0	0	0	0	0	0	0	0	0	0	0	0	0
OTU_1092	k__Bacteria	p__Firmicutes	c__Clostridia	o__Clostridiales	f__unidentified_Clostridiales	g__unidentified_Clostridiales	s__Clostridium_perfringens	0	3	0	0	0	0	0	18	0	0	0	0	0	0	0	0	0	0	0	0	0	1	0	0	0	1	3	0	0	0	0	0	0	0	0	0	0	0	4	0
OTU_1093	k__Bacteria	p__Bacteroidetes	c__Bacteroidia	o__Bacteroidales	Others	Others	Others	0	0	0	0	0	6	0	0	0	0	0	0	0	0	0	0	0	0	0	0	0	0	0	0	0	0	0	0	0	0	0	0	0	0	0	0	0	0	0	0
OTU_1095	k__Bacteria	p__Bacteroidetes	c__Bacteroidia	o__Bacteroidales	f__Muribaculaceae	g__	s__	15	12	15	11	0	0	7	0	0	0	2	0	0	0	19	0	5	0	0	2	6	0	3	1	0	0	0	0	2	0	0	0	0	2	9	14	0	2	2	0
OTU_1097	k__Bacteria	p__Firmicutes	c__Clostridia	o__Clostridiales	f__Lachnospiraceae	Others	Others	0	0	0	0	0	0	0	0	0	0	0	0	0	0	0	3	0	0	0	0	0	0	0	0	0	0	34	0	0	259	0	0	0	0	0	124	0	0	0	2
OTU_1098	k__Bacteria	p__Firmicutes	c__Clostridia	o__Clostridiales	f__Lachnospiraceae	g__Tyzzerella	Others	0	0	4	0	0	0	0	0	0	0	0	0	0	0	0	0	0	0	0	0	0	0	2	0	0	0	0	0	19	0	0	1	0	0	0	0	0	0	0	0
OTU_1099	k__Bacteria	p__Firmicutes	c__Clostridia	o__Clostridiales	f__Ruminococcaceae	g__Butyricicoccus	s__	0	8	0	0	3	2	2	0	0	0	0	0	14	0	5	1	0	1	0	0	0	0	0	0	0	0	2	0	3	4	0	3	0	1	0	59	6	0	0	0
OTU_1100	k__Bacteria	p__Firmicutes	c__Clostridia	o__Clostridiales	f__Ruminococcaceae	Others	Others	31	1	15	9	16	5	7	13	2	2	5	18	14	5	16	8	7	15	5	9	0	3	5	17	20	0	7	1	21	13	36	12	9	37	124	343	15	8	15	4
OTU_1102	k__Bacteria	p__Proteobacteria	c__Gammaproteobacteria	o__unidentified_Gammaproteobacteria	f__Methylophilaceae	g__Methylophilus	Others	0	0	0	0	0	0	0	1	0	0	0	0	0	0	0	0	0	0	5	0	0	0	0	0	0	0	0	0	0	0	1	0	0	0	0	0	0	0	0	0
OTU_1103	k__Bacteria	p__Firmicutes	c__Clostridia	o__Clostridiales	f__Ruminococcaceae	g__Butyricicoccus	s__	0	2	4	0	0	0	3	0	0	0	0	0	0	0	0	0	0	0	0	0	0	0	0	0	0	0	0	0	0	0	0	0	2	0	0	0	3	0	0	0
OTU_1105	k__Bacteria	p__Acidobacteria	c__Acidobacteriia	o__Acidobacteriales	f__unidentified_Acidobacteriales	g__Acidipila	s__	0	7	2	0	0	0	0	0	0	0	0	0	0	0	0	0	0	0	0	0	0	0	0	0	0	0	0	0	0	0	0	0	0	0	0	0	0	0	0	0
OTU_1106	k__Bacteria	p__Bacteroidetes	c__Bacteroidia	o__Bacteroidales	f__	g__	s__	0	0	0	0	0	17	0	0	0	0	0	0	0	0	0	0	0	0	0	0	0	0	0	0	0	0	0	0	0	0	0	0	0	0	0	0	0	0	0	0
OTU_1107	k__Bacteria	p__Firmicutes	c__Clostridia	o__Clostridiales	f__Lachnospiraceae	Others	Others	1	0	1	4	3	3	2	0	0	0	0	0	0	3	13	1	5	0	0	0	0	4	0	7	0	0	0	3	0	0	0	8	0	0	14	0	0	0	2	4
OTU_1108	k__Bacteria	p__Proteobacteria	Others	Others	Others	Others	Others	0	0	0	0	0	17	0	0	0	0	0	0	0	0	0	0	0	0	0	0	0	0	0	0	0	0	0	0	0	0	0	0	0	0	0	0	0	0	0	0
OTU_1109	k__Bacteria	p__Melainabacteria	c__	o__	f__	g__	s__	0	0	0	0	0	0	0	0	0	0	0	0	0	0	0	0	0	0	0	0	0	0	0	0	0	0	0	0	0	0	0	0	0	0	0	0	0	0	0	0
OTU_1110	k__Bacteria	p__Firmicutes	c__Clostridia	o__Clostridiales	f__Lachnospiraceae	Others	Others	0	0	0	0	0	0	0	0	0	0	0	0	0	0	0	0	0	0	0	0	0	0	0	0	0	0	0	0	0	0	0	0	0	0	0	0	0	1	0	0
OTU_1111	k__Bacteria	p__Firmicutes	c__Clostridia	o__Clostridiales	f__Ruminococcaceae	g__unidentified_Ruminococcaceae	Others	5	0	1	5	0	0	0	0	0	0	0	0	0	0	0	0	0	0	0	0	0	0	5	0	4	0	0	0	0	0	0	0	0	0	0	0	0	0	0	2
OTU_1112	k__Bacteria	p__Tenericutes	c__Mollicutes	Others	Others	Others	Others	0	0	0	0	0	0	0	0	0	0	0	0	0	0	0	0	0	0	0	0	0	0	0	0	0	0	0	0	0	0	0	0	0	0	0	0	0	0	0	0
OTU_1113	k__Bacteria	p__Proteobacteria	c__Gammaproteobacteria	o__Pseudomonadales	f__Pseudomonadaceae	g__Pseudomonas	Others	2	0	0	0	0	3	0	0	0	0	0	0	0	0	0	0	0	0	0	0	0	0	3	0	0	0	3	0	0	0	2	0	1	0	0	0	0	0	3	0
OTU_1114	k__Bacteria	p__Firmicutes	c__Clostridia	o__Clostridiales	f__Lachnospiraceae	Others	Others	0	0	0	0	1	0	0	0	0	29	0	0	0	2	4	19	3	0	0	0	1	7	0	1	18	4	11	0	2	0	1	5	3	3	0	0	0	0	13	0
OTU_1115	k__Bacteria	p__Bacteroidetes	c__Bacteroidia	o__Bacteroidales	f__Bacteroidaceae	g__Bacteroides	s__Bacteroides_acidifaciens	45	4	6	1	0	0	17	11	2	0	5	3	10	4	0	5	4	10	7	27	8	2	3	4	41	3	0	5	5	0	1	3	9	5	19	2	8	9	54	12
OTU_1116	k__Bacteria	p__Firmicutes	c__Bacilli	o__Lactobacillales	f__Streptococcaceae	g__Streptococcus	Others	0	1	0	0	0	0	0	0	0	0	0	0	2	0	0	0	0	0	0	0	0	0	0	0	0	0	750	0	0	0	0	0	0	0	0	0	0	0	0	0
OTU_1117	k__Bacteria	p__Firmicutes	c__Erysipelotrichia	o__Erysipelotrichales	f__Erysipelotrichaceae	g__Ileibacterium	s__Ileibacterium_valens	0	3	4	1	0	0	0	0	2	15	0	0	0	5	0	0	1	0	0	8	2	7	0	1	0	3	0	0	0	0	0	0	0	0	0	0	4	5	3	0
OTU_1118	k__Bacteria	p__Firmicutes	c__Erysipelotrichia	o__Erysipelotrichales	f__Erysipelotrichaceae	g__Dubosiella	s__	94	27	40	12	491	344	73	294	2	177	103	8	2	32	1	223	46	24	317	20	23	30	17	48	0	8	0	13	9	3	4	5	1	246	0	27	17	80	17	30
OTU_1119	k__Bacteria	p__Firmicutes	c__Clostridia	o__Clostridiales	f__unidentified_Clostridiales	g__Sarcina	s__	0	0	0	0	0	0	0	0	0	0	0	0	0	0	0	0	0	0	0	0	1	0	0	0	0	0	0	0	0	0	0	0	0	0	0	0	0	0	0	0
OTU_1120	k__Bacteria	p__Firmicutes	c__Clostridia	o__Clostridiales	f__Lachnospiraceae	Others	Others	3	0	0	0	0	0	16	0	0	0	0	0	0	0	0	0	10	0	0	0	0	0	0	2	0	0	0	0	0	0	0	0	40	2	0	0	0	0	0	16
OTU_1121	k__Bacteria	p__Actinobacteria	c__unidentified_Actinobacteria	o__Corynebacteriales	f__Corynebacteriaceae	g__unidentified_Corynebacteriaceae	s__Corynebacterium_pseudodiphtheriticum	0	0	0	0	0	0	0	0	0	0	0	0	0	0	0	0	0	0	0	0	0	1	0	0	0	0	0	0	0	0	0	0	0	0	0	0	0	0	0	0
OTU_1122	k__Bacteria	p__Chloroflexi	c__Ktedonobacteria	o__Ktedonobacterales	f__	g__	s__	0	0	0	0	0	0	0	0	0	0	2	0	0	0	0	0	0	0	0	0	0	0	0	0	0	0	0	0	0	0	0	0	0	0	0	0	0	0	0	0
OTU_1123	k__Bacteria	p__Bacteroidetes	c__Bacteroidia	o__Flavobacteriales	f__Flavobacteriaceae	g__Flavobacterium	s__Flavobacterium_frigidarium	0	0	0	0	0	0	0	0	0	0	0	0	0	0	0	0	0	0	0	0	0	0	0	0	0	0	0	0	0	0	0	0	15	0	0	0	0	0	0	0
OTU_1124	k__Bacteria	p__Firmicutes	c__Bacilli	o__Bacillales	f__Listeriaceae	g__Brochothrix	s__Brochothrix_thermosphacta	0	7	0	0	0	0	0	2	0	0	0	0	0	0	0	0	0	0	0	0	0	1	0	0	0	0	0	0	0	0	0	0	0	0	0	0	0	0	0	0
OTU_1125	k__Bacteria	p__Firmicutes	c__Clostridia	o__Clostridiales	f__Lachnospiraceae	g__unidentified_Lachnospiraceae	s__[Clostridium]_colinum	0	0	0	0	0	0	0	0	0	0	0	0	0	0	0	0	0	0	0	0	0	0	0	0	0	0	0	0	0	0	0	0	0	0	0	0	0	0	0	0
OTU_1126	k__Bacteria	p__Firmicutes	c__Erysipelotrichia	o__Erysipelotrichales	f__Erysipelotrichaceae	g__Catenisphaera	s__	0	0	0	0	0	10	0	0	0	0	0	0	0	0	0	0	0	0	0	0	0	0	0	0	0	0	0	0	0	0	0	0	0	0	0	0	0	0	0	0
OTU_1127	k__Bacteria	p__Firmicutes	c__Clostridia	o__Clostridiales	f__Lachnospiraceae	g__Blautia	s__Blautia_glucerasea	0	0	0	4	0	0	0	0	0	0	0	3	0	0	0	0	0	0	0	0	0	0	0	0	0	0	0	0	0	0	0	0	0	0	0	0	0	0	0	0
OTU_1128	k__Bacteria	p__Spirochaetes	c__unidentified_Spirochaetes	o__unidentified_Spirochaetes	f__Leptospiraceae	Others	Others	0	0	0	0	0	9	0	0	0	0	0	0	0	0	0	0	0	0	0	0	0	0	0	0	0	0	0	0	0	0	0	0	0	0	0	0	0	0	0	0
OTU_1129	k__Bacteria	p__unidentified_Bacteria	c__unidentified_Bacteria	o__Campylobacterales	f__Helicobacteraceae	g__Helicobacter	Others	12	51	291	58	5	18	50	19	6	4	111	237	18	2	253	7	88	8	5	4	18	5	297	4	13	37	14	66	0	4	3	31	236	9	0	98	40	30	17	124
OTU_1130	k__Bacteria	p__Bacteroidetes	c__Bacteroidia	o__Bacteroidales	f__	g__	s__	0	0	0	0	0	0	0	3	0	0	0	0	0	0	0	0	0	0	0	0	0	0	0	0	0	0	0	0	0	0	0	0	0	0	0	0	0	0	0	0
OTU_1131	k__Bacteria	p__Firmicutes	c__Clostridia	o__Clostridiales	f__Ruminococcaceae	g__unidentified_Ruminococcaceae	Others	0	0	0	3	0	0	1	0	0	0	0	0	2	1	2	62	5	0	0	0	0	1	2	0	64	2	0	2	12	0	0	0	0	0	3	0	0	0	1	1
OTU_1132	k__Bacteria	p__Firmicutes	c__Clostridia	o__Clostridiales	f__Lachnospiraceae	Others	Others	6	22	0	6	0	1	0	0	2	3	10	3	9	4	0	0	1	0	4	0	1	3	0	12	0	0	0	28	6	6	0	28	29	3	6	0	0	0	0	0
OTU_1133	k__Bacteria	p__Proteobacteria	c__Deltaproteobacteria	o__Syntrophobacterales	f__Syntrophaceae	g__Smithella	s__	0	0	0	0	0	19	0	0	0	0	0	0	0	0	0	0	0	0	0	0	0	0	0	0	0	0	0	0	0	0	0	0	0	0	0	0	0	0	0	0
OTU_1134	k__Bacteria	p__Firmicutes	c__Clostridia	o__Clostridiales	f__Lachnospiraceae	Others	Others	3	4	0	0	12	0	5	2	0	5	4	2	13	15	14	35	0	3	9	2	3	0	0	1	0	10	3	0	4	0	6	25	1	0	5	14	0	0	5	7
OTU_1135	k__Bacteria	p__Firmicutes	c__Clostridia	o__Clostridiales	f__Lachnospiraceae	Others	Others	7	3	0	4	0	0	0	30	0	0	0	0	0	5	0	2	3	6	0	0	0	0	0	0	0	2	49	10	0	12	0	0	63	0	2	0	0	0	0	0
OTU_1136	k__Bacteria	p__Firmicutes	c__Erysipelotrichia	o__Erysipelotrichales	f__Erysipelotrichaceae	g__Dubosiella	s__	13	0	2	0	62	36	1	38	1	12	10	0	0	4	0	29	2	2	29	2	0	3	1	5	0	0	0	0	0	0	0	0	0	13	0	0	0	6	0	0
OTU_1137	k__Bacteria	p__Synergistetes	c__Synergistia	o__Synergistales	f__Synergistaceae	g__unidentified_Synergistaceae	s__Synergistetes_bacterium_enrichment_culture_clone_DhR^2/LM-F01	0	0	0	0	0	10	0	0	0	0	0	0	0	0	0	0	0	0	0	0	0	0	0	0	0	0	0	0	0	0	0	0	0	0	0	0	0	0	0	0
OTU_1138	k__Bacteria	p__Firmicutes	c__Bacilli	o__Lactobacillales	f__Lactobacillaceae	g__Lactobacillus	s__Lactobacillus_mucosae	0	0	0	0	0	0	0	9	0	0	0	0	0	0	0	0	0	0	2	0	0	0	0	0	0	0	0	0	0	0	0	0	0	0	0	0	0	0	0	0
OTU_1139	k__Bacteria	p__Oxyphotobacteria	c__unidentified_Oxyphotobacteria	o__unidentified_Oxyphotobacteria	f__unidentified_Oxyphotobacteria	g__unidentified_Oxyphotobacteria	Others	4	0	0	0	0	0	0	0	0	0	0	0	0	0	2	0	0	0	0	0	0	0	0	0	0	0	0	0	0	0	0	0	0	0	0	0	0	0	0	4
OTU_1140	k__Bacteria	p__Proteobacteria	c__Gammaproteobacteria	o__unidentified_Gammaproteobacteria	f__Burkholderiaceae	g__Hydrogenophaga	Others	0	2	0	0	2	0	0	1	0	0	0	0	0	0	0	0	0	0	0	0	0	1	0	0	0	0	0	0	2	0	0	0	0	0	0	0	0	0	0	0
OTU_1141	k__Bacteria	p__Firmicutes	c__Clostridia	o__Clostridiales	Others	Others	Others	0	0	0	0	0	0	0	0	0	0	0	0	0	0	0	0	0	0	0	0	0	0	0	0	1	0	0	0	4	0	0	1	0	0	0	0	3	1	1	0
OTU_1142	k__Bacteria	p__Firmicutes	c__Erysipelotrichia	o__Erysipelotrichales	f__Erysipelotrichaceae	g__Faecalibaculum	Others	23	40	21	15	23	28	16	29	730	23	0	0	0	24	1	263	425	3	23	31	20	159	0	21	0	319	805	16	38	1568	711	11	0	69	16	32	600	14	25	24
OTU_1143	k__Bacteria	p__Firmicutes	c__Erysipelotrichia	o__Erysipelotrichales	f__Erysipelotrichaceae	g__Ileibacterium	s__Ileibacterium_valens	6	11	7	14	0	4	0	4	3	8	0	0	0	5	0	0	0	17	1	10	10	4	0	0	0	0	1	0	0	0	3	0	0	3	0	0	5	3	4	0
OTU_1147	k__Bacteria	p__Firmicutes	c__Clostridia	o__Clostridiales	f__Ruminococcaceae	g__Negativibacillus	s__	0	0	2	0	0	0	0	0	0	0	0	0	0	0	0	0	0	0	0	0	0	1	0	0	0	0	0	0	0	0	0	0	0	0	3	0	0	0	0	0
OTU_1148	k__Bacteria	p__Firmicutes	c__Clostridia	o__Clostridiales	f__Lachnospiraceae	Others	Others	0	0	0	0	0	0	0	0	0	0	0	0	0	0	0	0	2	0	0	0	0	0	0	0	0	0	2	0	1	0	0	0	0	0	0	0	2	3	0	0
OTU_1149	k__Bacteria	p__Firmicutes	c__Erysipelotrichia	o__Erysipelotrichales	f__Erysipelotrichaceae	g__Ileibacterium	s__Ileibacterium_valens	54	499	45	48	9	41	0	10	67	68	7	0	0	28	0	0	11	203	27	149	50	23	0	17	0	12	67	0	0	0	30	1	0	44	0	0	176	31	102	0
OTU_1151	k__Bacteria	p__Atribacteria	c__	o__	f__	g__	s__	0	0	0	0	0	10	0	0	0	0	0	0	0	0	0	0	0	0	0	0	0	0	0	0	0	0	0	0	0	0	0	0	0	0	0	0	0	0	0	0
OTU_1154	k__Bacteria	p__Firmicutes	c__Clostridia	o__Clostridiales	f__Ruminococcaceae	Others	Others	0	0	0	1	0	0	0	0	0	0	0	0	2	1	0	0	3	0	0	0	0	1	0	0	0	0	0	0	3	1	0	2	0	0	0	5	0	0	0	0
OTU_1157	k__Bacteria	p__Actinobacteria	c__Thermoleophilia	o__Solirubrobacterales	f__Solirubrobacteraceae	g__Conexibacter	s__	0	0	0	0	0	0	0	0	0	0	0	0	0	0	0	0	0	0	0	0	0	0	0	0	0	0	0	0	0	0	0	0	0	0	0	0	0	0	0	0
OTU_1158	k__Bacteria	p__Firmicutes	c__Clostridia	o__Clostridiales	f__Lachnospiraceae	Others	Others	1	0	3	1	0	0	1	0	3	0	0	2	5	0	3	0	5	0	2	0	0	0	0	0	0	0	1	1	0	4	0	0	3	5	8	12	0	0	0	0
OTU_1159	k__Bacteria	p__Firmicutes	c__Clostridia	o__Clostridiales	f__Lachnospiraceae	g__unidentified_Lachnospiraceae	Others	2	0	0	0	0	0	15	2	0	0	1	0	2	0	4	0	3	0	0	1	0	0	2	1	0	0	0	1	0	2	0	0	0	4	7	0	4	3	0	2
OTU_1160	k__Bacteria	p__Proteobacteria	c__Gammaproteobacteria	o__Enterobacteriales	f__Enterobacteriaceae	g__Proteus	s__Proteus_mirabilis	0	0	3	0	0	0	0	2	0	0	0	0	0	0	0	3	0	0	0	0	0	0	0	0	0	0	0	0	0	0	0	0	0	0	0	0	0	0	0	0
OTU_1161	k__Bacteria	p__Firmicutes	c__Bacilli	o__Lactobacillales	f__Carnobacteriaceae	g__Dolosigranulum	s__	0	0	0	0	0	0	0	0	0	0	0	1	0	0	0	0	0	0	0	0	0	1	0	0	0	0	0	2	0	0	0	0	0	0	0	0	0	0	0	0
OTU_1162	k__Bacteria	p__Firmicutes	c__Erysipelotrichia	o__Erysipelotrichales	f__Erysipelotrichaceae	g__Solobacterium	s__Solobacterium_moorei	0	0	0	0	0	0	0	0	0	0	0	0	0	0	0	0	0	0	0	0	0	0	0	0	0	0	0	0	0	0	0	0	0	0	0	0	0	0	0	5
OTU_1163	k__Bacteria	Others	Others	Others	Others	Others	Others	0	0	0	0	0	0	0	0	0	0	0	0	0	0	0	0	0	0	0	0	0	0	0	0	5	0	0	0	0	0	0	0	0	0	0	0	0	0	0	0
OTU_1164	k__Bacteria	p__Spirochaetes	c__Spirochaetia	o__Spirochaetales	f__Spirochaetaceae	g__unidentified_Spirochaetaceae	s__Treponema_medium	0	0	0	4	0	0	0	0	0	0	0	0	0	0	0	0	0	0	0	0	0	0	0	0	0	0	0	0	0	0	0	0	0	0	0	0	0	0	0	0
OTU_1165	k__Bacteria	p__Firmicutes	c__Clostridia	o__Clostridiales	f__Lachnospiraceae	Others	Others	2	3	8	1	2	5	51	1	1	0	7	0	703	22	25	2	18	9	7	1	5	11	24	62	11	2	14	29	9	20	24	14	4	2	8	0	8	14	10	1
OTU_1166	k__Bacteria	p__Firmicutes	c__Clostridia	o__Clostridiales	f__Lachnospiraceae	Others	Others	0	0	0	0	0	8	3	3	1	14	0	0	0	0	0	0	0	0	2	1	0	0	0	2	0	0	0	0	0	0	0	5	0	35	0	0	0	0	0	0
OTU_1167	k__Bacteria	p__Proteobacteria	c__Alphaproteobacteria	o__Sphingomonadales	f__Sphingomonadaceae	g__Sphingomonas	Others	0	34	0	0	1	0	0	0	0	0	0	0	0	0	0	0	0	0	0	0	0	0	0	0	0	0	0	0	0	0	0	0	0	0	0	0	0	0	0	0
OTU_1168	k__Bacteria	p__Firmicutes	c__Clostridia	o__Clostridiales	f__Lachnospiraceae	g__Lachnoclostridium	s__[Clostridium]_scindens	0	9	3	4	0	103	2	4	11	0	2	0	8	0	1	0	1	29	6	12	3	0	3	3	0	2	0	0	4	1	0	1	0	3	0	0	1	1	22	0
OTU_1169	k__Bacteria	p__Bacteroidetes	c__Bacteroidia	o__Bacteroidales	f__Muribaculaceae	g__	s__	0	0	0	0	0	0	0	0	0	0	0	0	0	0	0	0	13	0	0	0	0	0	0	0	0	0	0	3	0	0	0	0	0	0	0	0	0	0	0	0
OTU_1172	k__Bacteria	p__Proteobacteria	c__Alphaproteobacteria	o__unidentified_Alphaproteobacteria	f__unidentified_Alphaproteobacteria	Others	Others	0	8	0	0	0	0	0	0	0	0	0	0	0	0	0	0	0	0	0	0	0	0	0	0	0	0	0	0	0	0	0	0	0	0	0	0	0	0	0	0
OTU_1173	k__Bacteria	p__Firmicutes	c__Clostridia	o__Clostridiales	f__unidentified_Clostridiales	g__unidentified_Clostridiales	s__Clostridium_sp_ND2	0	0	0	0	0	0	0	1	0	0	0	4	0	0	0	0	0	0	0	0	0	0	0	0	0	0	0	0	2	0	0	0	0	0	0	0	0	0	0	0
OTU_1174	k__Bacteria	p__Firmicutes	c__Clostridia	o__Clostridiales	f__unidentified_Clostridiales	g__Mogibacterium	Others	0	0	0	0	0	0	0	3	0	0	0	0	0	0	0	0	0	0	0	0	0	0	0	0	0	0	0	0	0	0	0	0	0	0	0	0	0	0	0	0
OTU_1175	k__Bacteria	p__Proteobacteria	c__Gammaproteobacteria	o__Pseudomonadales	f__Pseudomonadaceae	g__Pseudomonas	s__Pseudomonas_xinjiangensis	0	0	0	0	0	0	0	0	0	0	0	0	0	0	0	0	0	0	0	0	0	0	0	0	0	0	0	0	0	0	0	0	4	0	0	0	0	0	0	0
OTU_1176	k__Bacteria	p__Firmicutes	c__Clostridia	o__Clostridiales	f__Ruminococcaceae	Others	Others	0	0	0	0	0	0	0	0	0	0	0	3	49	5	0	3	0	0	2	0	0	0	1	0	0	23	0	0	0	0	0	0	0	0	0	0	0	0	0	0
OTU_1178	k__Bacteria	p__Chloroflexi	c__Anaerolineae	o__Anaerolineales	f__Anaerolineaceae	Others	Others	0	0	0	0	0	18	0	0	0	0	0	0	0	0	0	0	0	0	0	0	0	0	0	0	0	0	0	0	0	0	0	0	0	0	0	0	0	0	0	0
OTU_1179	k__Bacteria	p__Actinobacteria	c__unidentified_Actinobacteria	o__Micrococcales	f__Micrococcaceae	g__Rothia	s__Rothia_nasimurium	0	8	0	0	0	0	0	0	0	0	0	0	0	0	0	0	0	0	0	0	0	0	0	0	0	0	0	0	0	0	0	0	0	0	0	0	0	0	0	0
OTU_1181	k__Bacteria	p__Tenericutes	c__Mollicutes	o__	f__	g__	s__	3	0	0	3	0	0	3	0	0	0	0	0	0	0	0	32	0	0	58	0	1	43	3	0	36	0	0	3	1	9	0	27	0	0	3	0	0	12	0	48
OTU_1182	k__Bacteria	p__Actinobacteria	c__unidentified_Actinobacteria	o__Propionibacteriales	f__Nocardioidaceae	g__Kribbella	Others	0	4	0	0	0	0	0	0	0	0	0	0	0	0	0	0	0	0	0	0	0	0	0	0	0	0	0	0	0	0	0	0	0	0	0	0	0	0	0	0
OTU_1183	k__Bacteria	p__Gemmatimonadetes	c__unidentified_Gemmatimonadetes	o__Gemmatimonadales	f__Gemmatimonadaceae	g__Gemmatimonas	s__	4	31	0	0	0	0	0	0	0	0	0	0	0	0	0	0	0	0	0	0	0	0	0	0	0	0	0	0	0	0	0	0	0	0	0	0	0	0	0	0
OTU_1185	k__Bacteria	p__Firmicutes	c__Clostridia	o__Clostridiales	f__Lachnospiraceae	Others	Others	0	0	0	0	0	6	2	0	0	1	0	0	3	0	5	0	49	0	0	0	3	0	0	1	0	0	9	0	6	0	0	1	0	5	1	0	0	0	0	0
OTU_1188	k__Bacteria	p__Firmicutes	c__Clostridia	o__Clostridiales	f__Lachnospiraceae	g__Lachnoclostridium	Others	0	0	0	0	0	0	0	0	0	0	0	0	0	0	0	0	0	0	0	0	0	0	2	0	0	0	0	0	0	0	0	0	0	0	0	0	0	0	0	0
OTU_1189	k__Bacteria	p__Firmicutes	c__Clostridia	o__Clostridiales	f__Lachnospiraceae	g__Lachnoclostridium	Others	0	4	0	5	5	2	4	1	0	11	5	6	13	7	2	0	1	0	3	4	2	1	2	5	0	2	0	3	2	0	5	10	1	1	5	0	1	4	1	0
OTU_1191	k__Bacteria	p__Firmicutes	c__Clostridia	o__Clostridiales	f__Lachnospiraceae	g__Fusicatenibacter	s__	0	7	0	0	0	0	0	89	0	0	0	0	0	0	0	0	0	0	1	0	0	0	0	0	0	0	0	4	0	0	0	0	10	0	0	0	0	0	0	0
OTU_1193	k__Bacteria	p__Firmicutes	c__Clostridia	o__Clostridiales	f__Ruminococcaceae	Others	Others	0	0	0	0	0	1	5	0	17	0	5	16	2	145	0	0	3	184	2	2	0	2	0	56	0	3	0	0	0	0	7	0	0	0	7	0	0	43	0	0
OTU_1194	k__Bacteria	p__Firmicutes	c__Clostridia	o__Clostridiales	f__Lachnospiraceae	Others	Others	1	2	6	2	0	0	2	0	0	0	8	0	0	0	3	14	0	0	0	0	0	0	0	0	2	0	0	0	3	0	2	2	4	3	1	0	0	0	0	2
OTU_1196	k__Bacteria	p__Firmicutes	c__Clostridia	o__Clostridiales	f__Lachnospiraceae	g__Blautia	Others	0	0	0	0	0	0	0	9	0	0	0	0	0	0	0	0	0	0	0	0	0	0	0	0	0	0	0	0	0	0	0	0	0	0	0	0	0	0	0	0
OTU_1197	k__Bacteria	p__Firmicutes	c__Clostridia	o__Clostridiales	f__unidentified_Clostridiales	g__unidentified_Clostridiales	Others	0	0	1	0	0	0	0	32	0	0	0	0	0	1	0	0	0	0	0	0	0	0	0	0	0	0	0	0	0	0	0	0	3	0	0	0	0	0	0	0
OTU_1198	k__Bacteria	p__Firmicutes	c__Clostridia	o__Clostridiales	f__Lachnospiraceae	g__unidentified_Lachnospiraceae	Others	0	0	0	0	0	0	0	0	0	0	7	0	0	4	0	0	0	0	0	0	0	0	0	0	0	0	1	0	4	50	0	0	0	0	0	34	3	0	0	2
OTU_1199	k__Bacteria	p__Firmicutes	c__Clostridia	o__Clostridiales	f__Peptococcaceae	g__Peptococcus	s__	3	3	1	2	0	1	2	1	4	0	0	0	2	3	3	2	0	1	1	4	1	0	0	0	0	3	0	0	3	1	0	1	2	1	3	12	0	3	1	5
OTU_1200	k__Bacteria	p__Spirochaetes	c__Spirochaetia	o__Spirochaetales	f__Spirochaetaceae	Others	Others	0	0	0	0	0	8	0	0	0	0	0	0	0	0	0	0	0	0	0	0	0	0	0	0	0	0	0	0	0	0	0	0	0	0	0	0	0	0	0	0
OTU_1201	k__Bacteria	p__Firmicutes	c__Clostridia	o__Clostridiales	f__Lachnospiraceae	Others	Others	2	0	0	2	0	0	1	0	0	0	0	2	0	0	0	2	0	0	0	3	0	0	0	0	0	0	0	0	6	0	0	0	0	0	9	0	0	0	0	0
OTU_1203	k__Bacteria	p__Firmicutes	c__Bacilli	o__Lactobacillales	f__Lactobacillaceae	g__Lactobacillus	s__Lactobacillus_iners	0	0	0	0	8	0	0	0	0	0	1	0	0	0	0	0	0	0	0	0	0	0	1	7	0	0	0	0	0	0	0	0	0	0	0	0	0	0	0	0
OTU_1204	k__Bacteria	p__Bacteroidetes	c__Bacteroidia	o__Bacteroidales	f__Prevotellaceae	Others	Others	0	0	0	0	0	0	0	0	0	0	0	0	0	0	0	0	0	0	0	0	0	0	0	0	0	0	0	0	2	0	0	0	0	0	0	0	0	0	0	0
OTU_1205	k__Bacteria	p__Firmicutes	c__Bacilli	o__Lactobacillales	f__Lactobacillaceae	g__Lactobacillus	Others	0	11	1	0	0	13	0	5	33	23	9	6	393	15	0	9	6	4	149	24	6	10	0	0	26	17	17	2	11	569	25	24	1	5	0	16	32	9	23	12
OTU_1206	k__Bacteria	p__Bacteroidetes	c__Bacteroidia	o__Bacteroidales	f__Muribaculaceae	g__	s__	0	3	0	0	0	0	0	0	0	0	0	0	0	0	0	0	3	0	0	0	0	0	1	0	0	0	0	0	0	0	0	0	0	0	0	0	0	0	0	0
OTU_1208	k__Bacteria	p__Firmicutes	c__Clostridia	o__Clostridiales	f__Syntrophomonadaceae	g__Syntrophomonas	Others	0	0	0	0	0	12	0	0	0	0	0	0	0	0	0	0	0	0	0	0	0	0	0	0	0	0	0	0	0	0	0	0	0	0	0	0	0	0	0	0
OTU_1209	k__Bacteria	p__unidentified_Bacteria	c__unidentified_Bacteria	o__unidentified_Bacteria	f__unidentified_Bacteria	g__Aegiribacteria	Others	0	0	0	0	0	7	0	0	0	0	0	0	0	0	0	0	0	0	0	0	0	0	0	0	0	0	0	0	0	0	0	0	0	0	0	0	0	0	0	0
OTU_1210	k__Bacteria	p__Bacteroidetes	c__Bacteroidia	o__Bacteroidales	f__Muribaculaceae	g__	s__	0	0	0	0	0	0	0	0	0	0	0	0	0	0	0	0	0	0	1	0	0	0	0	0	0	0	0	0	0	0	0	0	0	0	0	262	0	0	0	0
OTU_1211	k__Bacteria	p__Firmicutes	c__Bacilli	o__Lactobacillales	f__Streptococcaceae	g__Streptococcus	Others	0	6	0	0	0	0	0	47	0	0	0	0	0	2	0	0	0	0	0	0	0	0	0	0	0	0	12	0	0	0	0	0	0	0	0	0	0	0	2	0
OTU_1213	k__Bacteria	p__Spirochaetes	c__Spirochaetia	o__Spirochaetales	f__Spirochaetaceae	Others	Others	0	0	0	0	0	4	0	0	0	0	0	0	0	0	0	0	0	0	0	0	0	0	0	0	0	0	0	0	0	0	0	0	0	0	0	0	0	0	0	0
OTU_1214	k__Bacteria	p__Firmicutes	c__Clostridia	o__Clostridiales	f__Lachnospiraceae	Others	Others	0	0	0	0	0	0	0	0	0	0	0	0	0	0	0	0	0	0	0	0	0	0	0	0	0	0	0	0	0	0	0	0	0	0	4	0	0	0	0	0
OTU_1215	k__Bacteria	p__Firmicutes	c__Clostridia	o__Clostridiales	f__Lachnospiraceae	Others	Others	0	0	0	0	44	14	1	22	0	0	17	2	11	45	4	0	5	0	0	244	5	0	0	82	15	423	4	50	11	63	3	3	8	5	1	63	15	4	616	112
OTU_1216	k__Bacteria	p__Actinobacteria	c__Thermoleophilia	o__Gaiellales	f__	g__	s__	0	0	0	0	0	9	0	0	0	0	0	0	0	0	0	0	0	0	0	0	0	0	0	0	0	0	0	0	0	0	0	0	0	0	0	0	0	0	0	0
OTU_1217	k__Bacteria	p__Firmicutes	c__Bacilli	o__Bacillales	f__Alicyclobacillaceae	g__Tumebacillus	s__	0	18	0	0	0	0	0	0	0	0	0	0	0	0	0	0	0	0	0	0	0	0	0	0	0	0	0	0	0	0	0	0	0	0	0	0	0	0	0	0
OTU_1218	k__Bacteria	p__Firmicutes	c__Clostridia	o__Clostridiales	f__Peptococcaceae	g__	s__	0	0	0	0	0	10	0	0	0	0	0	0	0	0	0	0	0	0	0	0	0	0	0	0	0	0	0	0	0	0	0	0	0	0	0	0	0	0	0	0
OTU_1219	k__Bacteria	p__Firmicutes	c__Clostridia	o__Clostridiales	f__Lachnospiraceae	g__Blautia	Others	0	0	0	0	0	0	0	0	0	0	1	2	5	0	0	0	5	0	0	0	0	0	0	0	0	0	0	0	0	0	0	0	0	0	0	0	0	0	0	0
OTU_1220	k__Bacteria	p__Proteobacteria	c__Alphaproteobacteria	o__Rhizobiales	f__Rhizobiaceae	g__unidentified_Rhizobiaceae	Others	0	0	0	0	0	0	0	0	0	0	0	0	0	0	0	0	0	0	2	0	0	0	0	0	0	0	0	0	0	0	0	0	0	0	0	0	0	0	0	0
OTU_1221	k__Bacteria	p__Firmicutes	c__Clostridia	o__Clostridiales	f__Lachnospiraceae	g__Lachnoclostridium	s__Dorea_sp_5-2	6	5	3	7	2	3	0	1	0	2	45	108	9	20	0	7	11	0	0	0	7	8	4	0	3	12	41	21	336	177	9	7	1	6	14	116	79	3	3	321
OTU_1222	k__Bacteria	Others	Others	Others	Others	Others	Others	0	0	0	0	0	0	0	0	0	0	0	0	0	0	0	0	0	0	0	0	0	0	0	0	0	0	0	0	0	0	0	0	0	0	0	0	0	0	0	0
OTU_1223	k__Bacteria	p__Firmicutes	c__Clostridia	o__Clostridiales	f__Ruminococcaceae	g__Hydrogenoanaerobacterium	s__	0	0	0	0	0	0	0	1	0	0	0	0	0	0	0	0	0	0	0	0	0	0	0	0	0	0	0	0	0	0	0	0	0	0	0	0	0	0	0	0
OTU_1224	k__Bacteria	p__Firmicutes	c__Clostridia	o__Clostridiales	f__Lachnospiraceae	Others	Others	3	1	0	0	0	0	1	0	0	0	0	0	0	2	16	0	1	4	0	3	3	0	0	8	0	4	0	0	9	10	1	1	14	3	2	6	0	0	5	2
OTU_1226	k__Bacteria	p__Firmicutes	c__Clostridia	o__Clostridiales	f__Lachnospiraceae	Others	Others	0	0	0	0	0	0	0	2	0	0	0	0	0	0	0	0	0	0	0	0	0	0	0	0	0	0	0	0	2	0	0	0	0	0	0	0	0	0	0	0
OTU_1227	k__Bacteria	p__Proteobacteria	c__Gammaproteobacteria	o__Oceanospirillales	f__Halomonadaceae	g__Cobetia	Others	0	3	2	1	0	0	0	0	0	0	0	0	0	0	0	0	0	0	0	0	0	0	0	0	0	1	0	0	0	0	0	0	0	0	0	0	0	0	0	0
OTU_1229	k__Bacteria	p__Tenericutes	c__Mollicutes	o__Anaeroplasmatales	f__Anaeroplasmataceae	g__Anaeroplasma	s__	0	0	0	0	0	0	4	0	0	0	0	0	0	0	0	0	0	0	0	0	0	0	0	0	0	0	0	0	0	0	0	0	0	0	0	0	0	2	0	0
OTU_1230	k__Bacteria	p__Gemmatimonadetes	c__unidentified_Gemmatimonadetes	o__Gemmatimonadales	f__Gemmatimonadaceae	g__unidentified_Gemmatimonadaceae	s__Gemmatimonas_sp_WX54	0	12	0	0	0	0	0	0	0	0	0	0	0	0	0	0	0	0	0	0	0	0	0	0	0	0	0	0	0	0	0	0	0	0	0	0	0	0	0	0
OTU_1233	k__Bacteria	p__Tenericutes	c__Mollicutes	o__	f__	g__	s__	0	0	12	0	0	0	3	0	7	2	85	0	0	110	0	0	0	0	0	0	0	0	1	3	0	0	4	21	48	0	0	0	1	0	0	0	0	3	3	0
OTU_1235	k__Bacteria	p__Oxyphotobacteria	c__unidentified_Oxyphotobacteria	o__Synechococcales	Others	Others	Others	0	0	0	0	0	0	0	0	0	0	0	0	0	0	0	0	0	0	0	0	0	0	0	0	0	0	0	0	0	0	0	1	0	0	0	0	0	0	0	0
OTU_1236	k__Bacteria	p__Chloroflexi	c__Anaerolineae	o__Anaerolineales	f__Anaerolineaceae	g__Pelolinea	s__	0	0	0	0	0	10	0	0	0	0	0	0	0	0	0	0	0	0	0	0	0	0	0	0	0	0	0	0	0	0	0	0	0	0	0	0	0	0	0	0
OTU_1238	k__Bacteria	p__Actinobacteria	c__Coriobacteriia	o__Coriobacteriales	f__Eggerthellaceae	g__Enterorhabdus	Others	0	4	0	0	2	15	0	0	0	0	0	0	6	0	0	2	0	2	0	5	0	0	0	0	0	0	0	0	0	2	0	0	0	6	0	0	0	0	6	0
OTU_1239	k__Bacteria	p__Actinobacteria	c__unidentified_Actinobacteria	o__Bifidobacteriales	f__Bifidobacteriaceae	g__Bifidobacterium	Others	0	3	0	5	13	18	4	17	3	4	0	0	0	69	0	0	10	0	0	30	0	3	0	224	0	0	0	0	0	4	0	1	0	22	0	0	1	10	11	0
OTU_1240	k__Bacteria	p__Firmicutes	c__Erysipelotrichia	o__Erysipelotrichales	f__Erysipelotrichaceae	g__Ileibacterium	s__Ileibacterium_valens	21	621	16	10	1	27	0	1	44	42	2	0	4	5	1	0	6	139	17	78	16	8	0	22	0	0	69	0	0	0	21	0	0	13	0	0	152	9	84	0
OTU_1241	k__Bacteria	p__Firmicutes	Others	Others	Others	Others	Others	0	0	0	0	0	0	0	0	0	0	0	2	0	0	0	0	0	0	0	0	0	0	0	0	2	0	0	0	0	0	0	0	0	0	0	0	0	0	0	0
OTU_1242	k__Bacteria	Others	Others	Others	Others	Others	Others	0	0	0	0	0	3	0	0	0	0	0	0	0	0	0	0	0	0	0	0	0	0	0	0	0	0	0	0	0	0	0	0	0	0	0	0	0	0	0	0
OTU_1244	k__Bacteria	p__Proteobacteria	c__Deltaproteobacteria	o__Desulfovibrionales	f__Desulfovibrionaceae	g__Desulfovibrio	s__Desulfovibrio_sp_enrichment_culture_clone_06-1235251-126	0	0	0	0	0	13	0	0	0	0	0	0	0	0	0	0	0	0	0	0	0	0	0	0	0	0	0	0	0	0	0	0	0	0	0	0	0	0	0	0
OTU_1245	k__Bacteria	p__Firmicutes	c__Clostridia	o__Clostridiales	Others	Others	Others	0	0	0	0	1	0	0	0	0	0	0	0	0	3	0	2	0	0	0	0	0	0	5	0	0	0	0	0	0	0	0	3	0	0	1	0	0	3	1	2
OTU_1246	k__Bacteria	p__Proteobacteria	c__Gammaproteobacteria	o__Pseudomonadales	f__Pseudomonadaceae	g__Pseudomonas	Others	0	5	3	0	0	0	0	0	0	0	0	0	0	1	0	0	0	0	0	0	0	0	0	0	0	0	2	0	0	0	0	2	4	0	0	0	0	0	0	4
OTU_1247	k__Bacteria	p__Firmicutes	c__Clostridia	o__Clostridiales	f__Lachnospiraceae	Others	Others	3	0	0	4	2	0	1	0	0	0	0	0	2	4	2	0	2	0	0	0	0	0	0	0	3	16	16	2	22	1	0	0	0	4	1	16	0	0	0	0
OTU_1248	k__Bacteria	p__Firmicutes	c__Clostridia	o__Clostridiales	f__Lachnospiraceae	Others	Others	0	0	0	0	0	0	1	0	0	0	0	11	0	0	9	0	0	0	0	0	0	0	0	8	1	0	0	7	2	0	0	9	6	0	4	6	0	0	0	2
OTU_1249	k__Bacteria	p__Firmicutes	c__Bacilli	o__Lactobacillales	f__Lactobacillaceae	g__Pediococcus	s__Pediococcus_pentosaceus	0	0	0	0	0	0	0	0	0	0	1	1	0	2	0	1	0	0	1	0	0	0	0	0	0	2	1	4	7	19	1	3	0	0	0	0	0	3	0	3
OTU_1250	k__Bacteria	Others	Others	Others	Others	Others	Others	0	0	0	0	0	11	0	0	0	0	0	0	0	0	0	0	0	0	0	0	0	0	0	0	0	0	0	0	0	0	0	0	0	0	0	0	0	0	0	0
OTU_1251	k__Bacteria	p__Bacteroidetes	c__Bacteroidia	o__Bacteroidales	f__Bacteroidaceae	g__Bacteroides	s__Bacteroides_barnesiae	0	0	0	0	0	0	0	0	0	0	0	0	0	0	0	0	0	0	0	0	0	0	0	0	0	0	0	0	0	0	0	0	0	0	0	0	0	0	0	1
OTU_1252	k__Bacteria	p__Bacteroidetes	c__Bacteroidia	o__Bacteroidales	f__Tannerellaceae	g__Parabacteroides	s__Parabacteroides_merdae	0	0	0	0	1	3	2	0	0	0	0	0	0	0	0	0	0	0	0	0	0	2	0	0	0	0	0	4	21	0	0	0	0	0	0	0	0	0	0	0
OTU_1253	k__Bacteria	p__Bacteroidetes	c__Bacteroidia	o__Bacteroidales	f__Muribaculaceae	g__	s__	0	0	0	0	0	0	0	0	0	0	0	0	0	0	0	0	5	0	0	0	0	0	0	0	0	0	1	0	0	0	0	0	0	0	0	0	0	0	0	0
OTU_1254	k__Bacteria	p__Actinobacteria	c__unidentified_Actinobacteria	o__Bifidobacteriales	f__Bifidobacteriaceae	g__Bifidobacterium	Others	1	5	2	0	8	7	2	2	0	3	0	0	0	23	0	0	4	0	0	15	0	0	0	139	0	0	0	0	0	0	0	1	0	6	0	0	0	5	17	0
OTU_1255	k__Archaea	p__Euryarchaeota	c__Methanobacteria	o__Methanobacteriales	f__Methanobacteriaceae	g__Methanobacterium	s__Methanobacterium_beijingense	0	0	0	0	0	766	0	4	0	1	0	0	0	0	0	0	0	0	0	0	0	0	0	0	0	0	0	0	0	0	0	0	0	0	0	0	0	0	0	0
OTU_1256	k__Bacteria	p__Firmicutes	c__Clostridia	o__Clostridiales	f__Lachnospiraceae	Others	Others	3	4	0	5	0	0	2	0	1	0	9	0	8	3	0	1	4	0	0	5	0	0	0	0	0	0	0	0	1	1	1	0	0	0	5	15	0	4	2	0
OTU_1257	k__Bacteria	p__Bacteroidetes	c__Bacteroidia	o__Bacteroidales	f__Prevotellaceae	Others	Others	0	2	0	0	0	0	0	0	0	0	0	0	0	0	0	0	0	0	0	0	0	0	0	0	0	0	0	0	0	0	0	0	0	0	0	0	0	0	0	0
OTU_1258	k__Bacteria	p__Firmicutes	c__Clostridia	o__Clostridiales	f__Lachnospiraceae	Others	Others	7	11	3	3	1	0	2	0	0	0	0	0	0	7	44	1	10	0	0	9	5	0	1	9	0	9	0	5	0	11	11	37	40	4	0	0	1	1	8	0
OTU_1259	k__Bacteria	p__Firmicutes	c__Bacilli	o__Bacillales	f__Sporolactobacillaceae	g__	s__	0	1	0	0	0	0	0	0	0	0	0	0	0	0	0	0	0	0	0	0	0	0	0	0	0	0	0	0	4	0	0	0	0	0	0	0	0	0	0	0
OTU_1260	k__Bacteria	p__Firmicutes	c__Clostridia	o__Clostridiales	f__Lachnospiraceae	Others	Others	0	0	0	0	0	0	0	0	1	0	0	0	14	0	3	0	0	118	0	0	0	0	0	1	0	0	0	7	4	0	0	17	3	0	2	24	0	0	0	1
OTU_1261	k__Bacteria	p__unidentified_Bacteria	c__unidentified_Bacteria	o__Campylobacterales	f__unidentified_Campylobacterales	g__Sulfurovum	s__	0	0	0	0	0	0	0	0	0	0	0	0	0	0	0	0	0	0	0	0	0	0	0	0	0	0	0	2	0	0	0	0	0	0	0	0	0	0	0	0
OTU_1262	k__Bacteria	Others	Others	Others	Others	Others	Others	0	0	0	0	0	0	0	0	0	0	0	0	0	0	0	0	0	0	1	0	0	0	2	0	0	0	0	0	0	0	0	0	0	0	0	0	2	0	0	0
OTU_1264	k__Bacteria	p__Oxyphotobacteria	c__unidentified_Oxyphotobacteria	o__Synechococcales	f__unidentified_Synechococcales	g__unidentified_Synechococcales	Others	0	0	0	0	0	0	0	1	0	0	0	0	0	0	0	0	0	0	0	0	0	0	0	0	0	0	0	0	0	0	0	0	0	0	0	0	0	0	0	0
OTU_1266	k__Bacteria	p__Bacteroidetes	c__Bacteroidia	o__Bacteroidales	f__Muribaculaceae	g__	s__	4	1	0	3	4	4	0	2	0	0	4	0	3	3	0	3	1	8	18	0	0	2	4	2	7	3	1	4	1	0	1	7	7	4	9	3	12	3	10	3
OTU_1267	k__Bacteria	p__unidentified_Bacteria	c__unidentified_Bacteria	o__unidentified_Bacteria	f__unidentified_Bacteria	g__Aegiribacteria	s__	0	0	0	0	0	6	0	0	0	0	0	0	0	0	0	0	0	0	0	0	0	0	0	0	0	0	0	0	0	0	0	0	0	0	0	0	0	0	0	0
OTU_1268	k__Bacteria	p__Firmicutes	c__Clostridia	o__Clostridiales	f__Lachnospiraceae	Others	Others	0	0	0	0	0	0	0	0	0	0	5	0	0	0	0	0	0	0	0	0	0	0	0	0	0	0	0	0	4	9	0	5	0	0	0	34	0	0	0	9
OTU_1269	k__Bacteria	p__Firmicutes	c__Clostridia	o__Clostridiales	f__Lachnospiraceae	Others	Others	0	0	0	0	2	0	2	0	17	0	16	0	496	0	0	0	1	0	1	0	0	0	8	0	0	10	0	0	0	0	0	0	0	0	0	0	0	0	0	0
OTU_1270	k__Bacteria	p__Proteobacteria	c__Alphaproteobacteria	o__unidentified_Alphaproteobacteria	f__Acetobacteraceae	g__Komagataeibacter	Others	0	0	0	0	0	0	0	0	0	0	0	0	0	0	0	0	0	0	0	0	0	3	0	0	0	0	0	0	0	0	0	0	0	2	0	0	0	2	0	0
OTU_1272	k__Bacteria	p__Firmicutes	c__Negativicutes	o__Selenomonadales	f__Acidaminococcaceae	g__	s__	0	0	0	0	0	0	0	3	0	0	0	0	0	0	0	0	0	0	0	0	0	0	0	0	0	0	0	0	0	0	0	0	0	0	0	0	0	0	0	0
OTU_1274	k__Bacteria	p__Firmicutes	c__Clostridia	o__Clostridiales	f__Lachnospiraceae	Others	Others	0	3	0	0	0	0	1	1	0	0	0	0	17	2	0	4	5	6	0	0	0	0	0	0	0	0	0	0	0	0	0	0	0	0	215	0	0	0	0	0
OTU_1275	k__Bacteria	p__Planctomycetes	c__Phycisphaerae	Others	Others	Others	Others	0	0	0	0	0	2	0	0	0	0	0	0	0	0	0	0	0	0	0	0	0	0	0	0	0	0	0	0	0	0	0	0	0	0	0	0	0	0	0	0
OTU_1276	k__Bacteria	p__Firmicutes	c__Clostridia	o__Clostridiales	f__Ruminococcaceae	g__unidentified_Ruminococcaceae	Others	0	0	0	0	0	0	0	0	0	0	0	0	0	0	0	9	0	0	18	0	0	0	0	0	13	0	0	0	0	0	2	0	0	0	1	0	0	0	0	0
OTU_1277	k__Bacteria	p__Chloroflexi	c__Chloroflexia	o__Chloroflexales	f__Roseiflexaceae	g__	s__	0	3	0	0	0	0	0	0	0	0	0	0	0	0	0	0	0	0	0	0	0	0	0	0	0	0	0	0	0	0	0	0	0	0	0	0	0	0	0	0
OTU_1278	k__Bacteria	p__Firmicutes	c__Clostridia	o__Clostridiales	Others	Others	Others	0	0	0	0	0	10	0	0	0	0	0	0	0	0	0	0	0	0	0	0	0	0	0	0	0	0	0	0	0	0	0	0	0	0	0	0	0	0	0	0
OTU_1280	k__Bacteria	p__Firmicutes	c__Clostridia	o__Clostridiales	f__Christensenellaceae	g__Catabacter	s__Christensenella_timonensis	0	0	0	0	0	0	0	0	0	0	0	0	0	0	0	0	0	0	0	0	0	0	0	0	0	0	0	0	0	0	0	0	0	0	0	0	0	0	0	0
OTU_1281	k__Bacteria	p__Proteobacteria	c__Gammaproteobacteria	o__Xanthomonadales	f__Xanthomonadaceae	Others	Others	0	5	0	0	0	0	0	0	0	0	0	0	0	0	0	0	0	0	0	0	0	0	3	11	0	0	0	0	0	0	0	0	6	0	0	0	0	0	0	0
OTU_1283	k__Bacteria	p__Bacteroidetes	c__Bacteroidia	o__Bacteroidales	f__Bacteroidaceae	g__Bacteroides	Others	0	0	0	0	0	0	0	0	0	0	0	0	0	0	0	0	0	0	0	0	0	0	0	0	3	0	0	0	0	0	0	0	0	0	0	0	0	0	0	0
OTU_1284	k__Bacteria	p__Proteobacteria	c__Gammaproteobacteria	o__unidentified_Gammaproteobacteria	f__Coxiellaceae	g__Coxiella	s__	0	0	0	0	0	6	0	0	0	0	0	0	0	0	0	0	0	0	0	0	0	0	0	0	0	0	0	0	0	0	0	0	0	0	0	0	0	0	0	0
OTU_1285	k__Bacteria	p__Bacteroidetes	c__Bacteroidia	o__Bacteroidales	f__Bacteroidaceae	g__Bacteroides	Others	0	0	0	0	0	0	3	0	0	0	0	0	0	0	0	0	0	0	0	1	0	0	0	0	0	0	0	0	0	0	0	0	0	0	0	0	0	0	0	0
OTU_1286	k__Bacteria	p__Bacteroidetes	c__Bacteroidia	o__Sphingobacteriales	f__Lentimicrobiaceae	g__	s__	0	3	0	0	0	0	0	0	0	0	0	0	0	0	0	0	0	0	0	0	0	0	0	0	0	0	0	0	0	0	0	0	0	0	0	0	0	0	0	0
OTU_1288	k__Bacteria	p__Firmicutes	c__Clostridia	o__Clostridiales	f__Lachnospiraceae	Others	Others	0	0	0	0	0	0	11	0	0	0	0	0	0	1	3	0	0	0	0	0	0	0	0	0	0	0	4	0	12	2	0	0	0	0	0	58	16	0	0	14
OTU_1289	k__Bacteria	p__Actinobacteria	c__Coriobacteriia	o__Coriobacteriales	Others	Others	Others	0	0	0	0	0	5	0	0	0	0	0	0	0	0	0	0	0	0	0	0	0	0	0	0	0	0	0	0	0	0	0	0	0	0	0	0	0	0	0	0
OTU_1290	k__Bacteria	p__Proteobacteria	c__Deltaproteobacteria	o__Syntrophobacterales	f__Syntrophaceae	g__Syntrophus	s__	0	0	0	0	0	7	0	0	0	0	0	0	0	0	0	0	0	0	0	0	0	0	0	0	0	0	0	0	0	0	0	0	0	0	0	0	0	0	0	0
OTU_1291	k__Bacteria	p__Firmicutes	c__Clostridia	o__Clostridiales	f__Lachnospiraceae	g__Roseburia	s__Eubacterium_sp_14-2	0	0	0	0	0	0	0	0	0	0	2	0	2	0	0	0	0	0	0	0	0	0	0	0	0	0	0	0	0	294	0	0	0	0	0	0	0	0	0	4
OTU_1292	k__Bacteria	Others	Others	Others	Others	Others	Others	0	0	0	0	0	0	0	0	0	0	0	0	0	0	0	0	0	0	0	0	0	0	0	0	0	0	0	0	0	0	0	0	0	0	0	0	0	0	0	0
OTU_1293	k__Bacteria	p__Firmicutes	c__Clostridia	o__Clostridiales	f__Ruminococcaceae	Others	Others	0	0	0	0	0	0	0	0	0	0	0	0	4	0	0	0	0	0	3	0	0	0	0	0	2	0	0	0	0	0	0	3	0	0	0	0	0	0	0	1
OTU_1294	k__Bacteria	p__Proteobacteria	c__Gammaproteobacteria	o__unidentified_Gammaproteobacteria	f__unidentified_Gammaproteobacteria	g__Acidibacter	s__	0	4	0	0	0	0	0	0	0	0	0	0	0	0	0	0	0	0	0	0	0	0	0	1	0	0	0	0	0	0	0	0	0	0	0	0	0	0	0	0
OTU_1295	k__Bacteria	p__Actinobacteria	c__Coriobacteriia	o__Coriobacteriales	f__Eggerthellaceae	g__Enterorhabdus	s__	0	0	0	0	0	0	0	0	0	0	0	0	0	0	0	0	0	0	0	0	0	0	1	0	0	0	0	0	0	0	0	0	0	0	0	0	0	0	0	0
OTU_1296	k__Bacteria	p__Firmicutes	c__Bacilli	o__Lactobacillales	f__Lactobacillaceae	g__Lactobacillus	Others	0	0	2	2	1	0	0	1	0	0	4	3	2	0	1	13	6	0	7	2	1	2	5	0	46	6	4	0	5	7	1	8	3	3	0	4	2	6	4	7
OTU_1298	k__Bacteria	p__Proteobacteria	c__Deltaproteobacteria	o__Desulfovibrionales	f__Desulfovibrionaceae	g__Desulfovibrio	Others	0	0	0	0	0	0	0	0	0	0	0	0	0	0	0	0	7	0	0	0	0	0	0	0	0	0	0	0	0	0	0	0	0	0	0	0	0	0	0	0
OTU_1301	k__Bacteria	p__Firmicutes	c__Clostridia	o__Clostridiales	f__Lachnospiraceae	Others	Others	0	1	0	0	0	0	0	0	0	0	0	0	0	0	0	0	0	0	0	0	0	0	0	0	0	0	0	0	0	0	0	0	0	0	0	0	0	0	0	0
OTU_1304	k__Bacteria	p__Firmicutes	c__Clostridia	o__Clostridiales	f__Ruminococcaceae	g__unidentified_Ruminococcaceae	Others	5	39	63	16	43	0	16	36	1	22	30	1	793	71	37	4	234	30	4	14	13	203	35	385	33	4	2	147	22	31	2	32	35	40	37	93	2	11	7	1
OTU_1305	k__Bacteria	p__Firmicutes	c__Clostridia	o__Clostridiales	f__Lachnospiraceae	Others	Others	0	13	1	1	45	32	9	0	0	0	0	5	0	0	162	0	110	0	0	3	12	0	1	0	0	0	0	0	6	0	1	1	1	4	15	8	0	0	2	0
OTU_1306	k__Bacteria	p__Firmicutes	c__Clostridia	o__Clostridiales	f__Lachnospiraceae	g__unidentified_Lachnospiraceae	s__Coprococcus_eutactus	0	3	0	0	0	0	0	12	0	0	0	0	0	0	0	0	0	0	0	0	0	0	0	0	0	0	0	0	6	0	0	0	0	0	0	0	0	0	0	0
OTU_1307	k__Bacteria	p__Firmicutes	c__Clostridia	o__Clostridiales	f__Lachnospiraceae	g__unidentified_Lachnospiraceae	s__Lachnospiraceae_bacterium_A2	3	0	0	0	2	4	0	27	0	11	49	0	4	0	27	426	2	26	1	0	9	1	0	1	0	0	0	3	219	6	3	53	0	12	0	3	109	0	3	378
OTU_1308	k__Bacteria	p__Bacteroidetes	c__Bacteroidia	o__Bacteroidales	f__Muribaculaceae	g__	s__	0	0	0	0	0	0	0	0	0	0	0	0	0	0	0	0	3	0	0	0	0	0	0	0	0	0	0	0	0	0	0	0	0	0	0	0	0	0	0	0
OTU_1309	k__Bacteria	p__Firmicutes	c__Clostridia	o__Clostridiales	f__Lachnospiraceae	Others	Others	0	0	0	0	0	0	0	0	0	0	0	0	0	0	1	3	3	0	0	0	0	0	0	0	0	0	0	0	3	0	0	0	4	0	0	0	0	0	0	0
OTU_1310	k__Bacteria	p__Firmicutes	c__Clostridia	o__Clostridiales	f__Lachnospiraceae	Others	Others	0	0	0	0	0	15	0	0	0	0	0	0	0	0	0	0	0	13	0	0	0	0	0	0	0	0	0	0	0	0	0	0	0	4	0	0	0	0	3	0
OTU_1312	k__Bacteria	p__Firmicutes	c__Clostridia	o__Clostridiales	f__Ruminococcaceae	g__	s__	0	0	0	0	0	0	0	0	0	0	0	0	0	0	0	0	3	0	0	0	0	0	0	0	0	0	0	0	0	0	0	0	0	0	0	0	0	0	0	0
OTU_1314	k__Bacteria	p__Firmicutes	c__Erysipelotrichia	o__Erysipelotrichales	f__Erysipelotrichaceae	g__Dubosiella	s__	5	0	3	1	36	40	58	12	0	52	17	5	0	3	0	9	10	3	20	2	7	5	2	8	0	1	1	1	1	0	4	0	0	42	0	38	5	4	0	2
OTU_1315	k__Bacteria	p__Proteobacteria	c__Gammaproteobacteria	o__Cellvibrionales	f__Halieaceae	Others	Others	0	0	0	0	0	0	0	0	0	0	0	0	0	0	0	0	0	0	0	0	0	0	0	0	0	0	0	0	0	0	0	0	4	0	0	0	0	0	0	0
OTU_1316	k__Bacteria	p__Firmicutes	c__Clostridia	o__Clostridiales	f__Lachnospiraceae	g__Marvinbryantia	Others	1	0	0	0	0	0	0	1	0	0	7	0	6	0	2	0	1	0	0	0	0	0	0	0	0	1	0	3	0	2	0	1	0	0	0	0	0	1	2	3
OTU_1318	k__Bacteria	p__Proteobacteria	c__Alphaproteobacteria	o__Sphingomonadales	f__Sphingomonadaceae	g__Sphingomonas	s__Sphingomonas_sp_WX113	0	13	0	0	0	0	0	0	0	0	0	0	0	0	0	0	0	0	0	0	0	0	0	0	0	0	0	0	0	0	0	0	2	0	0	0	0	0	0	0
OTU_1320	k__Bacteria	p__Proteobacteria	c__Gammaproteobacteria	Others	Others	Others	Others	0	0	0	0	0	0	0	0	0	0	2	0	0	0	0	0	0	0	0	0	0	0	0	0	0	0	0	0	0	0	0	0	0	0	0	0	0	0	0	0
OTU_1321	k__Bacteria	p__Actinobacteria	Others	Others	Others	Others	Others	0	0	4	0	0	0	0	0	0	0	0	0	0	0	0	0	0	0	0	0	0	0	0	0	0	0	0	0	0	0	0	0	0	0	0	0	0	0	0	2
OTU_1322	k__Bacteria	p__Deferribacteres	c__unidentified_Deferribacteres	o__Deferribacterales	f__Deferribacteraceae	g__Mucispirillum	Others	14	47	79	28	49	13	45	22	3	23	17	67	158	20	116	160	87	30	26	11	2	8	69	26	41	49	4	58	26	10	3	102	350	12	193	29	6	16	52	30
OTU_1324	k__Bacteria	p__Firmicutes	c__Erysipelotrichia	o__Erysipelotrichales	f__Erysipelotrichaceae	g__Ileibacterium	s__Ileibacterium_valens	20	447	35	31	11	78	0	7	113	107	2	0	0	21	3	0	8	378	47	162	45	20	0	100	0	7	154	0	0	2	38	2	0	34	0	0	394	26	189	0
OTU_1325	k__Bacteria	p__Firmicutes	c__Clostridia	o__Clostridiales	f__Lachnospiraceae	g__Blautia	s__Lachnospiraceae_bacterium_DW59	2	2	0	3	0	0	1	4	0	3	0	0	34	0	30	0	6	4	0	1	0	0	0	2	7	2	2	14	3	4	10	0	1	9	0	0	59	6	4	0
OTU_1326	k__Bacteria	p__Firmicutes	c__Clostridia	o__Clostridiales	f__Lachnospiraceae	Others	Others	0	0	0	2	0	0	30	0	15	0	0	0	0	0	0	0	0	1	0	0	0	50	0	7	0	0	0	0	16	0	0	0	0	0	28	5	0	0	0	0
OTU_1327	k__Bacteria	p__Firmicutes	c__Clostridia	o__Clostridiales	f__Lachnospiraceae	Others	Others	0	0	0	0	0	0	0	0	0	0	0	0	0	0	0	0	0	0	0	0	0	0	0	0	0	0	0	0	0	0	0	0	0	0	0	2	0	0	0	0
OTU_1328	k__Bacteria	p__Firmicutes	c__Clostridia	o__Clostridiales	f__Lachnospiraceae	Others	Others	0	2	0	1	2	1	1	0	2	0	1	0	11	7	11	0	2	7	1	0	7	40	8	5	1	13	15	15	5	0	0	8	2	0	22	81	0	13	0	0
OTU_1330	k__Bacteria	p__Firmicutes	c__Clostridia	o__Clostridiales	f__Lachnospiraceae	Others	Others	2	2	0	0	0	0	0	0	2	0	1	4	2	5	0	3	1	2	0	0	0	0	3	3	0	1	1	0	5	3	0	1	2	4	4	0	3	0	2	3
OTU_1331	k__Bacteria	p__Bacteroidetes	c__Bacteroidia	Others	Others	Others	Others	0	4	0	0	0	0	0	0	0	0	0	0	0	0	0	0	0	0	0	0	0	0	0	0	0	0	0	0	0	0	0	0	0	0	0	0	0	0	0	0
OTU_1332	k__Bacteria	p__Firmicutes	c__Bacilli	o__Bacillales	f__Paenibacillaceae	g__Ammoniphilus	s__	0	0	0	0	0	0	0	0	0	0	0	0	0	0	0	0	0	0	0	0	0	0	0	0	0	0	0	0	0	0	0	0	0	0	0	0	0	0	8	0
OTU_1333	k__Bacteria	p__Firmicutes	c__Clostridia	o__Clostridiales	f__Lachnospiraceae	g__unidentified_Lachnospiraceae	Others	0	0	0	0	0	0	0	0	0	0	0	0	0	0	0	0	0	0	0	0	0	0	0	0	0	0	0	0	0	0	0	0	0	0	2	2	0	0	0	0
OTU_1334	k__Bacteria	p__Actinobacteria	c__unidentified_Actinobacteria	o__Bifidobacteriales	f__Bifidobacteriaceae	g__Bifidobacterium	Others	0	2	1	0	0	3	5	2	4	11	3	0	0	1	0	0	0	0	4	5	0	0	3	13	0	0	910	0	0	32	1	5	0	0	0	2	5	0	7	0
OTU_1336	k__Bacteria	p__Firmicutes	c__Clostridia	o__Clostridiales	f__Lachnospiraceae	Others	Others	4	1	0	2	0	0	1	2	6	0	4	8	0	0	13	4	3	0	6	0	0	0	3	0	5	1	0	3	0	1	1	11	7	6	0	29	0	0	1	1
OTU_1337	k__Bacteria	p__Firmicutes	c__Clostridia	o__Clostridiales	f__Lachnospiraceae	g__Tyzzerella	Others	0	0	0	0	0	0	0	0	0	0	0	0	1	0	0	0	0	0	0	0	0	0	0	0	0	0	0	0	0	0	0	0	0	0	0	0	0	0	0	0
OTU_1338	k__Bacteria	p__unidentified_Bacteria	c__unidentified_Bacteria	o__Campylobacterales	f__Helicobacteraceae	g__Helicobacter	Others	13	51	213	41	11	11	34	16	1	0	84	178	23	2	213	5	62	3	2	3	11	6	224	8	6	38	9	58	2	6	0	31	219	13	0	89	34	35	11	102
OTU_1339	k__Bacteria	p__Firmicutes	c__Erysipelotrichia	o__Erysipelotrichales	f__Erysipelotrichaceae	g__Erysipelatoclostridium	s__Erysipelatoclostridium_ramosum	3	0	1	1	0	0	0	1	0	0	6	1	0	0	0	1	0	0	0	0	0	0	9	0	1	0	0	1	0	0	2	0	1	0	2	0	0	0	7	1
OTU_1340	k__Bacteria	p__Bacteroidetes	c__Bacteroidia	o__Bacteroidales	f__Muribaculaceae	g__	s__	112	5	68	45	98	21	164	204	3	12	38	17	70	17	422	603	224	99	94	61	793	37	384	57	505	34	26	437	235	7	6	77	320	58	85	31	24	5	203	13
OTU_1341	k__Bacteria	p__Firmicutes	c__Clostridia	o__Clostridiales	f__Lachnospiraceae	g__Butyrivibrio	Others	0	2	0	0	0	0	0	0	0	0	0	0	0	0	0	0	0	0	0	0	0	0	0	0	0	0	0	0	0	0	0	0	0	0	0	0	0	0	0	0
OTU_1342	k__Bacteria	p__Firmicutes	c__Erysipelotrichia	o__Erysipelotrichales	f__Erysipelotrichaceae	g__Faecalibaculum	Others	0	2	4	0	5	3	1	2	8	158	37	30	0	3	0	0	11	3	46	158	1	4	42	3	0	1	10	6	3	1211	5	188	3	6	0	0	388	308	99	0
OTU_1344	k__Bacteria	p__Bacteroidetes	c__Bacteroidia	o__Bacteroidales	f__Muribaculaceae	g__	s__	2	0	2	0	0	0	1	2	0	0	0	0	0	0	0	0	0	0	0	0	1	1	0	0	0	0	0	0	0	0	0	0	0	0	1	0	0	0	0	3
OTU_1345	k__Bacteria	p__Proteobacteria	c__Alphaproteobacteria	o__Sphingomonadales	f__Sphingomonadaceae	g__Sphingomonas	s__Sphingomonas_jaspsi	0	9	0	0	0	0	0	0	0	0	0	0	0	0	0	0	0	0	0	0	0	0	0	4	0	0	0	0	0	0	0	0	0	0	0	0	0	0	0	0
OTU_1346	k__Bacteria	p__Firmicutes	c__Erysipelotrichia	o__Erysipelotrichales	f__Erysipelotrichaceae	g__Faecalibaculum	Others	0	0	0	0	0	0	0	0	2	1	0	1	0	0	0	0	0	0	0	0	0	0	0	0	0	0	0	0	0	6	0	4	0	0	0	0	2	4	0	0
OTU_1347	k__Bacteria	p__Proteobacteria	c__Gammaproteobacteria	o__unidentified_Gammaproteobacteria	f__unidentified_Gammaproteobacteria	g__unidentified_Gammaproteobacteria	s__bacterium_enrichment_culture_clone_DSR_18	0	0	0	0	0	4	0	0	0	0	0	0	0	0	0	0	0	0	0	0	0	0	0	0	0	0	0	0	0	0	0	0	0	0	0	0	0	0	0	0
OTU_1348	k__Bacteria	p__Firmicutes	c__Clostridia	o__Clostridiales	f__Lachnospiraceae	Others	Others	0	0	0	0	0	0	0	0	0	0	0	0	0	0	0	0	4	0	0	0	0	0	0	0	0	0	0	0	0	0	0	0	0	0	0	0	0	0	0	0
OTU_1349	k__Bacteria	p__Chloroflexi	c__Ktedonobacteria	o__Ktedonobacterales	f__	g__	s__	0	0	0	0	0	0	0	0	0	0	0	0	0	0	0	0	0	0	0	0	0	0	0	0	0	0	0	2	0	0	0	0	0	0	0	0	0	0	0	0
OTU_1350	k__Bacteria	p__Firmicutes	c__Clostridia	o__Clostridiales	f__Ruminococcaceae	g__Candidatus_Soleaferrea	Others	0	0	0	0	0	0	0	0	0	0	0	0	0	5	0	0	0	0	2	0	0	0	0	0	0	0	0	0	0	0	0	0	0	0	0	0	0	0	0	0
OTU_1352	k__Bacteria	p__Firmicutes	c__Clostridia	o__Clostridiales	f__Lachnospiraceae	Others	Others	0	0	0	0	0	0	0	0	0	0	3	0	0	0	0	0	0	0	0	0	0	0	0	0	0	0	0	0	1	0	0	0	0	0	0	0	0	0	0	0
OTU_1354	k__Bacteria	p__Proteobacteria	c__Deltaproteobacteria	o__Desulfuromonadales	f__Geobacteraceae	g__Geobacter	Others	0	0	0	0	0	6	0	0	0	0	0	0	0	0	0	0	0	0	0	0	0	0	0	0	0	1	0	0	0	0	0	0	0	0	0	0	0	0	0	0
OTU_1355	k__Bacteria	p__Deinococcus-Thermus	c__Deinococci	o__Thermales	f__Thermaceae	g__Thermus	s__Thermus_scotoductus	0	0	0	0	0	0	0	0	0	0	0	0	0	0	0	0	0	0	0	0	0	0	0	0	0	0	2	0	0	0	0	0	0	0	0	0	0	0	7	0
OTU_1356	k__Bacteria	p__Firmicutes	c__Bacilli	o__Lactobacillales	f__Aerococcaceae	g__Ignavigranum	s__	0	0	0	0	0	0	2	0	0	0	0	0	0	0	0	0	0	0	0	0	0	0	0	0	0	0	0	0	0	0	0	0	0	0	0	0	0	0	0	0
OTU_1357	k__Bacteria	p__Firmicutes	c__Clostridia	o__Clostridiales	f__Lachnospiraceae	g__unidentified_Lachnospiraceae	Others	0	0	0	0	0	0	0	0	0	0	0	0	0	0	2	0	0	4	0	0	0	0	0	0	0	0	0	0	0	0	0	0	0	0	0	0	0	0	0	0
OTU_1359	k__Bacteria	p__Firmicutes	c__Clostridia	o__Clostridiales	f__Lachnospiraceae	Others	Others	0	0	0	0	0	0	0	7	0	0	0	0	2	0	0	2	0	0	0	0	0	0	0	0	0	0	0	1	0	0	0	0	3	0	0	0	0	0	0	0
OTU_1360	k__Bacteria	p__Firmicutes	c__Clostridia	o__Clostridiales	f__Lachnospiraceae	Others	Others	1	1	0	3	6	3	20	3	1	5	26	2	27	25	5	1	15	5	0	4	7	0	0	24	3	22	29	34	39	2	3	31	10	19	16	12	1	0	5	0
OTU_1361	k__Bacteria	p__Actinobacteria	c__unidentified_Actinobacteria	o__Corynebacteriales	f__Corynebacteriaceae	g__unidentified_Corynebacteriaceae	Others	0	3	0	0	0	0	0	0	0	0	0	4	0	0	0	0	0	0	0	0	0	2	0	0	0	0	0	0	0	0	0	2	0	0	0	0	0	0	0	2
OTU_1362	k__Bacteria	p__Firmicutes	c__Clostridia	o__Clostridiales	f__Lachnospiraceae	Others	Others	0	0	0	0	0	0	0	0	0	0	0	0	0	0	0	0	4	0	0	0	0	0	0	0	0	0	0	0	0	0	0	0	0	0	0	0	0	0	0	0
OTU_1363	k__Bacteria	p__Firmicutes	c__Clostridia	o__Clostridiales	f__Lachnospiraceae	Others	Others	0	0	0	0	0	0	13	2	0	0	0	15	0	0	2	0	4	0	0	0	0	0	0	1	4	0	0	3	6	0	0	0	0	0	2	0	0	0	0	0
OTU_1364	k__Bacteria	p__Firmicutes	c__Clostridia	o__Clostridiales	f__Ruminococcaceae	g__Ruminiclostridium	s__[Clostridium]_leptum	28	1	7	23	3	0	1	8	0	1	0	8	11	0	3	10	3	0	2	4	0	0	0	0	76	3	0	6	4	1	3	10	3	5	18	30	2	3	11	3
OTU_1365	k__Bacteria	p__Firmicutes	c__Clostridia	o__Thermoanaerobacterales	f__	g__	s__	0	0	0	0	0	3	0	0	0	0	0	0	0	0	0	0	0	0	0	0	0	0	0	0	0	0	0	0	0	0	0	0	0	0	0	0	0	0	0	0
OTU_1366	k__Bacteria	p__Firmicutes	c__Clostridia	o__Clostridiales	f__Ruminococcaceae	Others	Others	0	0	0	0	0	0	0	0	0	0	0	0	0	0	0	0	0	0	0	0	0	0	0	0	0	0	0	0	10	0	0	0	0	0	0	0	0	0	0	0
OTU_1367	k__Bacteria	p__Firmicutes	c__Erysipelotrichia	o__Erysipelotrichales	f__Erysipelotrichaceae	g__Dubosiella	s__	0	0	0	0	4	4	11	2	5	6	9	5	0	1	37	0	0	0	1	3	0	0	62	0	0	18	89	0	0	6	3	3	3	1	1	372	24	1	2	0
OTU_1368	k__Bacteria	p__Bacteroidetes	c__Bacteroidia	o__Bacteroidales	f__Muribaculaceae	g__	s__	0	26	4	2	0	0	3	0	0	0	2	0	2	0	0	1	2	0	13	3	0	0	0	0	0	0	2	1	3	4	0	4	1	0	0	52	4	0	17	0
OTU_1369	k__Bacteria	p__Proteobacteria	c__Alphaproteobacteria	o__Rhodobacterales	f__Rhodobacteraceae	Others	Others	0	0	0	0	0	0	0	1	0	0	0	0	0	0	0	0	0	0	0	0	0	3	0	0	0	0	0	0	0	0	0	0	4	0	0	0	0	0	0	0
OTU_1370	k__Bacteria	p__Firmicutes	c__Clostridia	o__Clostridiales	f__Lachnospiraceae	Others	Others	0	0	0	0	0	0	0	0	18	0	0	0	0	0	0	0	0	172	0	0	0	0	0	0	0	0	1	0	0	0	0	0	0	0	0	0	0	0	0	0
OTU_1371	k__Bacteria	p__Firmicutes	c__Clostridia	o__Clostridiales	f__Ruminococcaceae	g__Intestinimonas	s__	11	1	5	13	2	0	5	8	0	0	2	6	21	3	57	13	8	0	5	4	8	0	7	5	17	2	2	8	25	10	1	12	5	5	8	15	1	1	1	4
OTU_1372	k__Bacteria	p__Firmicutes	c__Clostridia	o__Clostridiales	f__Lachnospiraceae	Others	Others	0	0	0	0	0	0	11	0	0	0	0	0	0	0	0	0	0	0	0	0	0	0	0	0	0	0	0	3	0	0	0	0	0	0	0	0	0	0	0	0
OTU_1373	k__Bacteria	p__unidentified_Bacteria	c__unidentified_Bacteria	o__Campylobacterales	f__Campylobacteraceae	g__Campylobacter	Others	0	0	0	0	0	0	0	0	0	0	0	0	0	0	0	0	0	0	0	0	0	0	0	0	0	2	0	0	0	0	0	0	0	0	0	0	0	0	0	0
OTU_1374	k__Bacteria	p__Firmicutes	c__Clostridia	o__Clostridiales	f__Lachnospiraceae	Others	Others	0	4	2	0	51	2	6	23	45	0	35	4	50	12	1	1	28	3	56	1	11	2	3	1	0	1	6	54	38	0	2	1	0	52	220	7	0	4	1	2
OTU_1375	k__Bacteria	p__Firmicutes	c__Bacilli	o__Lactobacillales	f__Lactobacillaceae	g__Lactobacillus	Others	0	7	0	0	0	2	0	0	3	4	0	3	19	0	0	4	1	1	14	5	0	2	0	0	2	2	26	0	10	125	4	1	0	0	0	1	8	0	0	1
OTU_1376	k__Bacteria	p__Firmicutes	c__Bacilli	o__Bacillales	f__Bacillaceae	Others	Others	0	0	0	0	0	0	0	0	0	0	0	0	0	0	0	0	0	0	0	0	0	0	0	0	1	0	0	0	0	0	0	0	0	0	0	0	0	0	0	0
OTU_1377	k__Bacteria	p__Bacteroidetes	c__Bacteroidia	o__Sphingobacteriales	f__	g__	s__	0	0	0	0	0	0	0	0	0	0	0	0	0	0	2	0	0	0	0	0	0	0	0	0	0	0	0	0	0	0	0	0	0	0	0	0	0	0	0	0
OTU_1378	k__Archaea	p__Euryarchaeota	c__Methanobacteria	o__Methanobacteriales	f__Methanobacteriaceae	g__Methanobrevibacter	s__Methanobrevibacter_smithii	0	0	0	0	0	0	0	0	0	0	0	0	0	0	0	0	0	0	0	0	0	0	1	0	0	0	0	0	0	0	0	0	0	0	0	0	0	0	0	0
OTU_1379	k__Bacteria	p__Verrucomicrobia	c__Verrucomicrobiae	Others	Others	Others	Others	0	0	0	0	0	0	0	2	0	0	0	0	0	0	0	0	0	0	0	0	0	0	0	0	0	0	0	0	0	0	0	0	0	0	0	0	0	0	0	0
OTU_1380	k__Bacteria	p__Firmicutes	c__Clostridia	o__Clostridiales	Others	Others	Others	0	0	0	0	0	0	0	0	0	0	0	0	0	0	0	0	0	0	0	0	0	0	0	0	3	0	2	0	3	32	0	0	0	0	0	8	1	0	0	5
OTU_1382	k__Bacteria	p__Actinobacteria	c__unidentified_Actinobacteria	o__Corynebacteriales	f__Corynebacteriaceae	g__unidentified_Corynebacteriaceae	s__Corynebacterium_urealyticum	0	0	0	0	0	0	0	0	0	0	0	0	0	0	0	0	4	0	0	0	0	0	0	0	25	0	0	0	0	0	0	0	0	0	0	0	0	0	0	0
OTU_1383	k__Bacteria	p__Bacteroidetes	c__Bacteroidia	o__Bacteroidales	f__	g__	s__	0	0	0	0	0	1	0	0	0	0	0	0	0	0	0	0	0	0	0	0	0	0	0	0	0	0	0	0	0	0	0	0	0	0	0	0	0	0	0	0
OTU_1384	k__Bacteria	p__Tenericutes	c__Mollicutes	o__	f__	g__	s__	0	0	0	0	0	0	2	0	0	0	0	0	0	0	0	0	0	0	0	0	0	0	1	0	0	0	0	0	0	0	0	0	0	0	0	0	0	0	0	0
OTU_1385	k__Bacteria	p__Firmicutes	c__Erysipelotrichia	o__Erysipelotrichales	f__Erysipelotrichaceae	g__Holdemania	s__	0	0	0	0	0	0	0	0	0	0	0	0	0	0	0	0	0	0	0	0	0	0	0	0	0	0	0	0	3	0	0	0	0	0	0	0	0	0	0	0
OTU_1386	k__Bacteria	p__Gemmatimonadetes	c__unidentified_Gemmatimonadetes	o__Gemmatimonadales	f__Gemmatimonadaceae	g__	s__	0	17	0	0	0	0	0	0	0	0	0	0	0	0	0	0	0	0	0	0	0	0	0	0	0	0	0	0	0	0	0	0	0	0	0	0	0	0	0	0
OTU_1387	k__Bacteria	p__Bacteroidetes	c__Bacteroidia	o__Bacteroidales	f__Bacteroidaceae	g__Bacteroides	s__Bacteroides_acidifaciens	43	0	0	0	0	0	11	0	0	0	1	0	0	0	2	7	1	1	0	0	2	0	4	0	19	0	0	0	1	0	0	0	3	0	1	2	0	5	4	4
OTU_1388	k__Bacteria	p__Firmicutes	c__Clostridia	o__Clostridiales	f__Lachnospiraceae	Others	Others	0	0	0	0	1	1	0	0	0	0	0	0	3	10	15	0	4	17	0	4	2	4	0	12	0	14	0	20	0	0	0	2	1	0	0	0	0	0	6	0
OTU_1389	k__Bacteria	p__Chloroflexi	c__Anaerolineae	Others	Others	Others	Others	0	10	0	0	0	0	0	0	0	0	0	0	0	0	0	0	0	0	0	0	0	0	0	0	0	0	0	0	0	0	0	0	0	0	0	0	0	0	0	0
OTU_1390	k__Bacteria	p__Firmicutes	c__Erysipelotrichia	o__Erysipelotrichales	f__Erysipelotrichaceae	g__Allobaculum	s__	0	0	0	0	0	0	0	0	0	0	0	0	0	0	0	0	0	0	0	0	0	0	0	0	0	0	0	0	0	0	0	2	0	0	0	0	0	0	0	0
OTU_1393	k__Bacteria	p__Firmicutes	c__Clostridia	o__Clostridiales	f__Ruminococcaceae	g__Candidatus_Soleaferrea	Others	0	0	0	0	0	0	0	0	0	0	0	0	0	0	0	0	0	0	0	0	0	0	0	0	0	0	0	0	0	0	0	0	0	0	0	0	0	0	0	0
OTU_1394	k__Bacteria	p__Actinobacteria	c__unidentified_Actinobacteria	o__Propionibacteriales	f__Propionibacteriaceae	g__Brooklawnia	s__	0	0	0	0	0	2	0	0	0	0	0	0	0	0	0	0	0	0	0	0	0	0	0	0	0	0	0	0	0	0	0	0	0	0	0	0	0	0	0	0
OTU_1397	k__Bacteria	Others	Others	Others	Others	Others	Others	0	3	0	0	0	0	0	0	0	0	0	0	0	0	0	0	0	0	0	0	0	0	0	0	0	0	0	0	0	0	0	0	0	0	0	0	0	0	0	0
OTU_1399	k__Bacteria	p__Tenericutes	c__Mollicutes	o__	f__	g__	s__	3	0	0	1	0	4	1	0	0	0	0	0	0	2	0	3	0	0	0	0	0	0	0	2	8	0	0	2	3	0	0	0	0	0	0	0	0	1	0	10
OTU_1401	k__Bacteria	p__Firmicutes	c__Clostridia	o__Clostridiales	f__Ruminococcaceae	g__Oscillibacter	s__	0	0	0	0	0	0	0	0	0	0	0	0	0	0	2	0	0	0	0	0	0	0	0	0	0	0	0	0	5	0	0	0	0	0	0	0	0	0	0	0
OTU_1402	k__Bacteria	p__Firmicutes	c__Clostridia	o__Clostridiales	f__Lachnospiraceae	g__Blautia	s__Lachnospiraceae_bacterium_DW59	0	0	5	3	6	3	0	0	0	0	0	0	2	0	6	0	4	2	0	23	1	0	0	3	7	1	0	49	4	0	3	1	0	50	1	0	11	0	29	0
OTU_1403	k__Bacteria	p__Chloroflexi	c__Anaerolineae	o__Anaerolineales	f__Anaerolineaceae	Others	Others	0	0	0	0	0	7	0	0	0	0	0	0	0	0	0	0	0	0	0	0	0	0	0	0	0	0	0	0	0	0	0	0	0	0	0	0	0	0	0	0
OTU_1404	k__Bacteria	p__Actinobacteria	c__Coriobacteriia	o__Coriobacteriales	f__Atopobiaceae	Others	Others	0	0	0	0	0	4	0	0	0	0	0	0	0	0	0	0	0	0	0	0	0	0	0	0	0	0	0	0	0	0	0	0	0	0	0	0	0	0	0	0
OTU_1405	k__Bacteria	p__Bacteroidetes	c__Bacteroidia	o__Bacteroidales	f__Muribaculaceae	g__	s__	0	0	0	0	0	0	0	0	0	0	0	0	0	0	0	0	3	0	0	0	0	0	0	0	0	0	0	0	0	0	0	0	0	0	0	0	0	0	0	0
OTU_1408	k__Bacteria	p__Firmicutes	c__Clostridia	o__Clostridiales	f__Lachnospiraceae	g__	s__	0	1	0	0	5	0	0	1	0	1	5	5	23	2	0	0	11	0	0	0	0	0	0	0	0	2	0	3	0	0	0	11	2	1	0	0	3	0	0	0
OTU_1410	k__Bacteria	p__Proteobacteria	c__Alphaproteobacteria	o__Rickettsiales	f__unidentified_Rickettsiales	g__unidentified_Rickettsiales	s__	0	0	0	0	0	0	0	0	0	0	0	0	0	0	0	0	0	0	0	0	0	0	0	0	0	0	0	0	0	0	0	0	0	0	0	0	0	0	0	6
OTU_1411	k__Bacteria	p__Bacteroidetes	c__Bacteroidia	o__Bacteroidales	f__Muribaculaceae	g__	s__	0	0	0	0	0	0	0	0	0	0	0	0	0	0	0	0	3	0	0	0	0	0	0	0	0	0	0	0	0	0	0	0	0	0	0	0	0	0	0	0
OTU_1412	k__Bacteria	p__Firmicutes	c__Clostridia	o__Clostridiales	f__Lachnospiraceae	g__Marvinbryantia	s__	0	0	0	0	0	0	0	6	0	0	0	0	0	0	0	0	0	0	0	0	0	0	0	0	0	0	0	0	0	0	0	0	3	0	0	0	0	0	0	0
OTU_1413	k__Bacteria	p__Firmicutes	c__Clostridia	o__Clostridiales	f__Christensenellaceae	g__	s__	0	0	0	0	0	0	0	0	0	0	0	0	0	0	0	0	0	0	0	0	0	0	0	0	0	0	0	0	3	0	0	0	0	0	0	0	0	0	0	0
OTU_1415	k__Bacteria	p__Gemmatimonadetes	c__unidentified_Gemmatimonadetes	o__Gemmatimonadales	f__Gemmatimonadaceae	g__	s__	0	2	0	0	0	0	0	0	0	0	0	0	0	0	0	0	0	0	0	0	0	0	0	0	0	0	0	0	0	0	0	0	0	0	0	0	0	0	0	3
OTU_1416	k__Bacteria	p__Firmicutes	c__Clostridia	o__Clostridiales	f__Lachnospiraceae	Others	Others	0	0	0	0	0	0	0	0	0	0	0	0	4	0	0	0	0	0	1	0	0	0	0	0	0	0	1	0	0	0	0	0	0	0	4	0	0	0	0	0
OTU_1417	k__Bacteria	p__Firmicutes	c__Clostridia	o__Clostridiales	f__Ruminococcaceae	Others	Others	0	13	0	3	0	0	0	0	0	0	0	0	0	33	0	0	0	0	2	0	0	0	0	0	0	0	0	0	0	0	0	0	0	0	0	4	0	0	0	0
OTU_1419	k__Bacteria	p__Actinobacteria	c__unidentified_Actinobacteria	o__Corynebacteriales	f__Corynebacteriaceae	g__Lawsonella	s__	0	0	0	0	0	0	2	0	0	0	0	0	0	0	0	0	0	0	0	0	0	0	0	0	0	0	0	0	0	0	0	0	0	0	0	0	0	0	3	0
OTU_1420	k__Bacteria	p__Actinobacteria	c__Coriobacteriia	o__Coriobacteriales	f__Coriobacteriaceae	g__Collinsella	Others	0	4	0	0	0	0	0	0	2	0	0	0	0	0	0	0	0	0	0	0	0	0	5	0	0	0	0	0	0	0	0	0	0	0	0	0	0	0	2	0
OTU_1422	k__Bacteria	p__Bacteroidetes	c__Bacteroidia	o__Sphingobacteriales	f__Lentimicrobiaceae	g__	s__	0	0	0	0	0	0	0	0	0	0	0	2	0	0	0	0	0	0	0	0	0	0	0	0	0	0	0	0	0	0	0	0	0	0	0	0	0	0	0	0
OTU_1423	k__Bacteria	p__Firmicutes	c__Clostridia	o__Clostridiales	f__Ruminococcaceae	g__unidentified_Ruminococcaceae	Others	5	32	20	2	17	2	6	7	0	11	3	0	68	2	5	4	0	4	50	0	0	0	4	14	6	1	3	1	12	3	1	2	0	17	3	17	12	8	2	1
OTU_1424	k__Bacteria	p__Tenericutes	c__Mollicutes	o__	f__	g__	s__	0	1	0	0	0	0	0	0	0	0	0	0	0	2	7	0	0	0	0	0	0	0	0	4	0	0	0	7	3	0	0	0	0	0	0	2	0	0	0	0
OTU_1426	k__Bacteria	p__Firmicutes	c__Bacilli	o__Lactobacillales	f__Lactobacillaceae	g__Lactobacillus	Others	2	4	12	12	29	9	0	23	13	13	24	38	51	27	0	58	12	1	50	3	10	45	0	0	37	113	43	16	143	149	15	56	12	5	4	0	1	9	0	23
OTU_1427	k__Bacteria	Others	Others	Others	Others	Others	Others	0	0	0	0	0	0	0	0	0	0	0	0	0	0	0	0	0	0	0	0	0	0	0	0	0	0	0	0	0	0	0	6	0	0	0	0	0	0	0	0
OTU_1428	k__Bacteria	p__Proteobacteria	c__Gammaproteobacteria	o__unidentified_Gammaproteobacteria	f__unidentified_Gammaproteobacteria	g__Steroidobacter	s__	0	6	0	0	0	0	0	0	0	0	0	0	0	0	0	0	0	0	1	0	0	0	0	2	0	0	0	0	0	0	0	0	1	0	0	0	0	0	0	0
OTU_1429	k__Bacteria	p__Actinobacteria	c__unidentified_Actinobacteria	o__Micromonosporales	f__Micromonosporaceae	Others	Others	0	6	0	0	0	0	0	0	0	0	0	0	0	0	0	0	0	0	0	0	0	0	0	0	0	0	0	0	0	0	0	0	0	0	0	0	0	0	0	0
OTU_1430	k__Bacteria	p__Firmicutes	c__Erysipelotrichia	o__Erysipelotrichales	f__Erysipelotrichaceae	g__Dubosiella	s__	5	7	5	12	84	144	100	106	947	426	241	323	7	98	222	0	68	9	129	239	73	64	168	138	0	683	250	1	0	17	978	97	113	277	81	298	79	29	114	39
OTU_1431	k__Bacteria	p__Bacteroidetes	c__Bacteroidia	o__Bacteroidales	f__Prevotellaceae	Others	Others	0	42	0	0	0	0	0	2	0	0	0	0	0	0	0	0	0	0	0	0	0	0	0	0	0	0	0	0	19	0	0	0	0	0	0	0	0	0	0	0
OTU_1432	k__Bacteria	p__Firmicutes	c__Clostridia	o__Clostridiales	f__Lachnospiraceae	Others	Others	0	0	0	0	0	0	0	0	0	0	0	0	18	0	0	0	0	0	1	0	0	0	0	0	5	0	3	2	0	0	7	0	1	0	1	3	0	0	0	0
OTU_1433	k__Bacteria	p__Firmicutes	c__Clostridia	o__Clostridiales	f__Ruminococcaceae	g__unidentified_Ruminococcaceae	Others	5	0	0	0	0	0	0	0	0	1	0	0	0	1	2	5	0	0	2	0	0	0	0	0	3	0	0	0	0	0	0	0	0	2	0	0	0	0	0	0
OTU_1434	k__Bacteria	p__Proteobacteria	c__Alphaproteobacteria	o__unidentified_Alphaproteobacteria	Others	Others	Others	0	1	0	0	0	0	0	0	0	0	0	0	0	0	0	0	0	0	0	0	0	0	0	6	0	0	0	0	0	0	0	0	0	0	0	0	0	0	0	0
OTU_1435	k__Bacteria	p__Tenericutes	c__Mollicutes	o__	f__	g__	s__	4	1	3	1	0	0	0	0	0	0	0	0	0	0	0	0	0	0	0	0	0	0	0	0	0	0	0	0	0	0	0	0	0	1	0	0	0	0	0	0
OTU_1436	k__Bacteria	p__Actinobacteria	c__unidentified_Actinobacteria	o__Frankiales	f__Geodermatophilaceae	g__Blastococcus	Others	0	0	0	0	0	0	0	0	0	0	0	0	0	0	0	0	0	0	0	0	0	0	0	0	0	0	0	0	0	0	0	0	0	0	0	0	0	0	0	0
OTU_1440	k__Bacteria	p__Actinobacteria	c__unidentified_Actinobacteria	o__Bifidobacteriales	f__Bifidobacteriaceae	g__Bifidobacterium	s__Bifidobacterium_bifidum	12	23	16	46	51	33	17	88	102	444	41	36	0	432	0	0	30	22	157	148	5	45	5	604	0	28	123	0	0	89	32	280	8	104	0	4	25	168	101	66
OTU_1442	k__Bacteria	p__Firmicutes	c__Clostridia	o__Clostridiales	f__Lachnospiraceae	g__Lachnoclostridium	Others	0	8	0	17	2	2	3	1	0	2	3	2	9	4	13	4	12	0	4	7	5	3	21	8	5	0	0	21	3	3	4	10	5	0	7	1	8	4	4	2
OTU_1443	k__Bacteria	p__Tenericutes	c__Mollicutes	o__	f__	g__	s__	0	0	0	2	0	0	31	0	0	1	0	0	0	1	0	0	0	0	0	2	0	0	0	0	0	0	0	0	1	0	0	0	0	0	0	0	0	34	0	68
OTU_1445	k__Bacteria	p__Proteobacteria	c__Deltaproteobacteria	o__Syntrophobacterales	f__Syntrophaceae	g__	s__	0	0	0	0	0	8	0	0	0	0	0	0	0	0	0	0	0	0	0	0	0	0	0	0	0	0	0	0	0	0	0	0	0	0	0	0	0	0	0	0
OTU_1447	k__Bacteria	p__Bacteroidetes	c__Bacteroidia	o__Bacteroidales	f__Bacteroidaceae	g__Bacteroides	s__Bacteroides_fragilis	106	5	13	8	2	0	20	28	2	0	16	26	7	2	32	15	23	13	88	17	17	4	22	4	183	28	7	12	29	2	3	36	73	7	185	9	24	27	35	21
OTU_1448	k__Bacteria	p__Proteobacteria	c__Gammaproteobacteria	o__Enterobacteriales	f__Enterobacteriaceae	g__Yersinia	Others	0	7	3	0	0	0	0	0	0	0	0	4	0	0	0	0	0	0	0	0	1	2	0	1	0	0	0	0	1	0	0	0	0	0	0	0	0	0	0	0
OTU_1449	k__Bacteria	p__Proteobacteria	c__Gammaproteobacteria	o__Xanthomonadales	f__Xanthomonadaceae	g__Pseudoxanthomonas	s__Pseudoxanthomonas_mexicana	0	0	0	0	0	0	0	0	0	0	0	0	0	0	0	0	0	0	0	0	0	0	0	0	0	0	0	0	0	0	0	3	0	0	0	0	0	0	0	0
OTU_1450	k__Bacteria	p__Actinobacteria	c__unidentified_Actinobacteria	o__Bifidobacteriales	f__Bifidobacteriaceae	g__Bifidobacterium	Others	0	1	0	0	0	0	0	1	7	9	3	0	0	0	0	0	0	3	5	4	0	0	0	0	0	0	509	0	0	24	1	0	0	0	0	0	2	1	9	0
OTU_1451	k__Bacteria	p__Firmicutes	c__Clostridia	o__Clostridiales	f__Lachnospiraceae	Others	Others	0	0	0	0	0	0	6	0	0	0	0	0	0	0	1	11	3	11	0	0	0	19	0	0	2	2	2	0	0	0	0	0	20	0	7	44	0	0	0	0
OTU_1452	k__Bacteria	p__Firmicutes	c__Bacilli	o__Bacillales	f__Staphylococcaceae	g__Staphylococcus	Others	0	18	4	2	11	7	3	5	8	49	122	10	91	36	1	14	8	2	31	2	7	15	29	9	32	7	0	27	7	91	3	39	2	6	4	0	0	3	10	20
OTU_1453	k__Bacteria	p__Firmicutes	c__Bacilli	o__Lactobacillales	f__Lactobacillaceae	g__Lactobacillus	s__Lactobacillus_sanfranciscensis	0	0	0	0	0	0	0	0	0	0	0	0	0	0	0	0	0	0	0	0	0	0	3	0	0	0	0	0	0	0	0	0	1	0	0	0	0	0	0	0
OTU_1454	k__Bacteria	p__Bacteroidetes	c__Bacteroidia	o__Bacteroidales	f__	g__	s__	0	0	0	0	0	6	0	0	0	0	0	0	0	0	0	0	0	0	0	0	0	0	0	0	0	0	0	0	0	0	0	0	0	0	0	0	0	0	0	0
OTU_1455	k__Bacteria	p__Proteobacteria	c__Alphaproteobacteria	o__Rhizobiales	f__Rhizobiaceae	g__Phyllobacterium	Others	16	2	0	0	0	0	0	2	0	2	2	0	7	18	0	17	0	0	3	0	0	9	0	0	12	9	0	0	0	0	0	54	0	0	0	0	0	11	111	0
OTU_1456	k__Archaea	p__Crenarchaeota	c__	o__	f__	g__	s__	0	0	0	0	0	1	0	0	0	0	0	0	0	0	0	0	0	0	0	0	0	0	0	0	0	0	0	0	0	0	0	0	0	0	0	0	0	0	0	0
OTU_1457	k__Bacteria	p__Firmicutes	c__Erysipelotrichia	o__Erysipelotrichales	f__Erysipelotrichaceae	Others	Others	0	0	0	0	0	0	1	0	0	0	0	0	0	0	0	0	0	0	0	0	1	0	0	0	0	0	0	0	0	0	0	0	0	0	0	0	5	0	0	0
OTU_1458	k__Bacteria	p__Atribacteria	c__	o__	f__	g__	s__	0	0	0	0	0	9	0	0	0	0	0	0	0	0	0	0	0	0	0	0	0	1	0	0	0	0	0	0	0	0	0	0	0	0	0	0	0	0	0	0
OTU_1459	k__Bacteria	p__Firmicutes	c__Clostridia	o__Clostridiales	f__Ruminococcaceae	Others	Others	0	0	0	0	0	0	0	0	0	0	0	0	0	0	0	0	0	0	0	0	0	0	0	0	0	0	0	0	0	0	0	0	0	0	0	0	0	0	0	0
OTU_1460	k__Bacteria	p__Chlamydiae	c__unidentified_Chlamydiae	o__Chlamydiales	Others	Others	Others	0	2	0	0	0	0	0	0	0	0	0	0	0	0	0	0	0	0	0	0	0	0	0	0	0	0	0	0	0	0	0	0	0	0	0	0	0	0	0	0
OTU_1461	k__Bacteria	p__Firmicutes	c__Clostridia	o__Clostridiales	f__Christensenellaceae	g__unidentified_Christensenellaceae	s__Clostridiales_bacterium_canine_oral_taxon_222	0	0	0	0	0	22	0	0	0	0	0	0	0	0	0	0	0	0	0	0	0	0	0	0	0	0	0	0	0	0	0	0	0	0	0	0	0	0	0	0
OTU_1462	k__Bacteria	p__Firmicutes	c__Clostridia	o__Clostridiales	f__Lachnospiraceae	g__Robinsoniella	s__Robinsoniella_peoriensis	0	0	0	0	0	0	0	3	0	0	0	0	0	0	0	0	0	0	0	0	0	0	1	0	0	0	0	0	0	0	0	0	0	0	0	0	0	0	0	0
OTU_1463	k__Bacteria	p__Bacteroidetes	c__Bacteroidia	o__Sphingobacteriales	Others	Others	Others	0	2	0	0	0	0	0	0	0	0	0	0	0	0	0	0	0	0	0	0	0	0	0	0	0	0	0	0	0	0	0	0	0	0	0	0	0	0	0	0
OTU_1464	k__Bacteria	p__Actinobacteria	c__unidentified_Actinobacteria	o__Micrococcales	f__Promicromonosporaceae	g__Cellulosimicrobium	s__Cellulosimicrobium_cellulans	0	1	0	0	0	0	0	0	0	0	0	0	0	0	0	0	0	0	0	0	0	0	0	0	0	0	0	0	0	0	0	1	0	0	0	0	0	0	0	0
OTU_1465	k__Bacteria	p__Firmicutes	c__Clostridia	o__Clostridiales	f__Lachnospiraceae	Others	Others	76	1	2	67	62	125	113	58	6	196	5	38	4	149	250	5	69	49	5	21	6	3	0	431	9	243	19	313	42	11	2	593	97	8	10	1	9	18	29	3
OTU_1466	k__Bacteria	p__Firmicutes	c__Erysipelotrichia	o__Erysipelotrichales	f__Erysipelotrichaceae	Others	Others	0	0	2	0	0	0	0	0	0	0	0	0	0	0	0	0	2	0	0	0	0	0	0	0	0	0	0	0	0	0	0	0	0	0	0	0	0	0	0	0
OTU_1467	k__Bacteria	p__Firmicutes	c__Clostridia	o__Clostridiales	f__Ruminococcaceae	g__Ruminiclostridium	s__	11	0	0	3	4	0	1	0	0	0	0	0	5	0	4	58	0	0	0	0	0	0	0	0	13	0	0	0	2	0	0	0	0	0	1	3	0	0	0	0
OTU_1468	k__Bacteria	p__Firmicutes	c__Clostridia	o__Clostridiales	f__Ruminococcaceae	g__unidentified_Ruminococcaceae	Others	0	0	0	0	0	0	1	0	0	0	0	0	0	0	1	0	0	0	0	0	0	0	0	0	2	0	0	0	2	0	0	0	0	0	0	0	0	0	0	0
OTU_1469	k__Bacteria	p__Firmicutes	c__Clostridia	o__Clostridiales	f__Lachnospiraceae	Others	Others	0	0	0	0	0	0	0	0	0	0	0	0	2	0	0	0	0	0	0	0	0	0	0	0	0	0	4	1	16	287	0	0	0	0	0	38	153	0	0	2
OTU_1470	k__Bacteria	p__Actinobacteria	c__unidentified_Actinobacteria	o__Propionibacteriales	f__Nocardioidaceae	Others	Others	0	5	0	0	0	0	0	0	0	0	0	0	0	0	0	0	0	0	4	0	0	0	0	0	0	0	1	0	0	0	0	0	2	0	0	0	0	0	0	0
OTU_1471	k__Bacteria	p__Firmicutes	c__Clostridia	o__Clostridiales	f__Lachnospiraceae	Others	Others	0	0	0	0	0	0	0	0	0	0	0	0	0	0	0	3	0	0	0	14	5	2	16	0	0	0	0	0	3	0	3	15	0	0	3	0	22	0	6	0
OTU_1472	k__Bacteria	p__unidentified_Bacteria	c__unidentified_Bacteria	o__Campylobacterales	f__Helicobacteraceae	g__Helicobacter	Others	0	4	3	0	0	27	0	2	6	2	2	2	1	0	1	0	0	7	0	2	0	0	0	0	0	0	0	0	0	2	0	2	0	4	0	2	0	0	29	0
OTU_1473	k__Bacteria	p__Bacteroidetes	c__Bacteroidia	o__Flavobacteriales	f__Flavobacteriaceae	g__Flavobacterium	Others	0	5	0	0	0	0	0	0	0	0	0	0	0	0	0	0	0	0	0	0	0	0	0	0	0	0	0	0	0	0	0	0	0	0	0	0	0	0	0	0
OTU_1474	k__Bacteria	p__Firmicutes	c__Erysipelotrichia	o__Erysipelotrichales	f__Erysipelotrichaceae	g__Dubosiella	s__	47	1	26	10	31	50	79	28	0	29	27	10	0	0	5	55	15	0	45	4	20	5	28	9	2	2	1	9	8	1	1	1	1	31	1	23	7	3	2	11
OTU_1475	k__Bacteria	p__Proteobacteria	c__Deltaproteobacteria	o__Desulfuromonadales	f__Desulfuromonadaceae	g__Desulfuromonas	s__	0	0	0	0	0	0	0	0	0	0	0	0	0	0	0	0	0	0	0	0	0	0	0	0	0	0	0	0	0	0	0	0	1	0	0	0	0	0	0	0
OTU_1476	k__Bacteria	p__Bacteroidetes	c__Bacteroidia	o__Bacteroidales	f__	g__	s__	0	0	0	0	0	124	0	2	3	0	0	0	0	0	0	0	0	0	0	0	0	0	0	0	0	0	0	0	0	0	0	0	0	0	0	0	0	0	0	0
OTU_1477	k__Bacteria	p__Gemmatimonadetes	c__unidentified_Gemmatimonadetes	o__Gemmatimonadales	f__Gemmatimonadaceae	Others	Others	0	4	0	0	0	0	0	0	0	0	0	0	0	0	0	0	0	0	0	0	0	0	0	0	0	0	0	0	0	0	0	0	0	0	0	0	0	0	0	0
OTU_1478	k__Bacteria	p__Firmicutes	c__Erysipelotrichia	o__Erysipelotrichales	f__Erysipelotrichaceae	g__Ileibacterium	s__Ileibacterium_valens	34	1250	20	17	7	162	0	4	279	172	0	0	5	18	0	1	6	859	112	383	23	6	0	113	0	2	375	0	0	2	98	1	0	89	0	5	847	25	436	0
OTU_1479	k__Bacteria	p__Proteobacteria	c__Deltaproteobacteria	o__Desulfovibrionales	f__Desulfovibrionaceae	g__	s__	0	0	0	0	0	0	0	0	0	0	0	0	0	0	0	0	7	0	0	0	0	0	0	0	0	0	0	0	0	0	0	0	0	0	0	0	0	0	0	0
OTU_1480	k__Bacteria	p__Bacteroidetes	c__Bacteroidia	o__Bacteroidales	f__Muribaculaceae	g__	s__	8	11	1	1	0	1	4	6	0	1	1	3	22	0	24	57	4	5	232	18	9	0	8	17	83	15	16	3	25	11	0	9	55	19	18	219	64	7	70	14
OTU_1481	k__Bacteria	p__Bacteroidetes	c__Bacteroidia	o__Bacteroidales	f__Muribaculaceae	g__	s__	13	0	7	2	3	5	5	29	2	0	6	6	6	0	80	128	13	5	63	28	31	6	36	1	152	33	3	14	34	4	0	19	122	30	50	45	21	7	138	16
OTU_1482	k__Bacteria	p__Actinobacteria	c__Coriobacteriia	o__Coriobacteriales	f__Eggerthellaceae	g__Enterorhabdus	Others	0	29	3	0	0	2	0	0	4	3	4	4	35	0	0	1	0	1	7	3	1	0	1	12	1	7	9	0	3	102	14	3	0	7	0	2	23	0	7	2
OTU_1483	k__Bacteria	p__Firmicutes	c__Clostridia	o__Clostridiales	Others	Others	Others	0	0	0	0	0	0	0	0	0	0	0	1	0	0	0	0	0	0	0	0	0	0	12	0	0	0	0	0	0	0	0	0	0	0	0	0	0	0	0	0
OTU_1484	k__Bacteria	p__Proteobacteria	c__Alphaproteobacteria	o__Rhizobiales	Others	Others	Others	0	0	0	0	0	0	0	0	0	0	0	0	0	0	0	0	0	0	0	0	0	0	0	3	0	0	0	0	0	0	0	0	0	0	0	0	0	0	0	0
OTU_1485	k__Bacteria	p__Firmicutes	c__Clostridia	o__Clostridiales	f__Lachnospiraceae	Others	Others	0	0	0	0	0	0	2	1	0	4	0	0	3	5	0	3	0	0	0	0	0	0	0	1	0	0	0	0	0	0	0	0	2	0	79	0	1	0	0	0
OTU_1486	k__Bacteria	p__Actinobacteria	c__unidentified_Actinobacteria	Others	Others	Others	Others	0	0	2	0	0	0	0	0	0	0	0	0	0	0	0	0	0	0	0	0	0	0	0	0	0	0	0	0	0	0	0	0	0	0	0	0	0	0	0	0
OTU_1487	k__Bacteria	p__Proteobacteria	c__Gammaproteobacteria	o__unidentified_Gammaproteobacteria	f__Methylophilaceae	Others	Others	0	1	2	0	0	0	0	1	0	0	0	0	0	0	0	0	0	0	1	0	0	0	0	0	0	0	0	0	2	0	0	2	0	0	0	0	0	0	0	0
OTU_1488	k__Bacteria	p__Firmicutes	c__Clostridia	o__Clostridiales	f__Lachnospiraceae	g__unidentified_Lachnospiraceae	s__Ruminococcus_lactaris	0	0	0	0	0	0	0	1	0	0	0	0	0	0	0	0	0	0	0	0	0	0	2	0	0	0	0	0	0	0	0	0	0	0	0	0	0	0	0	0
OTU_1489	k__Bacteria	p__Bacteroidetes	c__Bacteroidia	o__Bacteroidales	f__unidentified_Bacteroidales	g__Proteiniphilum	s__	0	0	0	0	0	12	0	0	0	0	0	0	0	0	0	0	0	0	0	0	0	0	0	0	0	0	0	0	0	0	0	0	0	0	0	0	0	0	0	0
OTU_1490	k__Bacteria	p__Firmicutes	c__Clostridia	o__Clostridiales	f__Ruminococcaceae	Others	Others	0	0	0	0	0	0	0	0	0	0	0	0	0	0	0	0	0	0	0	0	0	0	0	0	0	0	0	1	0	0	0	0	0	0	0	0	0	0	0	0
OTU_1491	k__Bacteria	p__Firmicutes	c__Erysipelotrichia	o__Erysipelotrichales	f__Erysipelotrichaceae	g__Erysipelatoclostridium	Others	0	0	0	0	0	0	0	0	0	0	2	0	0	0	0	0	0	0	0	0	0	0	0	0	0	0	0	2	0	0	0	0	1	0	0	0	0	0	0	0
OTU_1493	k__Bacteria	p__Bacteroidetes	c__Bacteroidia	o__Bacteroidales	f__Prevotellaceae	g__	s__	0	3	0	0	0	0	0	0	0	0	0	0	0	0	0	0	0	0	0	0	0	0	0	0	0	0	0	0	0	0	0	0	0	0	0	0	0	0	0	0
OTU_1494	k__Bacteria	p__Chloroflexi	c__	o__	f__	g__	s__	0	0	0	0	0	0	0	0	0	0	0	0	0	0	0	0	0	0	0	0	0	0	0	5	0	0	0	0	0	0	0	0	0	0	0	0	0	0	0	0
OTU_1497	k__Bacteria	p__unidentified_Bacteria	c__unidentified_Bacteria	o__Campylobacterales	f__Helicobacteraceae	g__Helicobacter	Others	0	4	11	0	0	0	1	0	0	0	4	11	1	0	4	1	4	0	0	0	1	0	9	0	1	2	1	2	0	0	0	4	14	0	0	5	3	3	0	4
OTU_1498	k__Bacteria	p__Proteobacteria	c__Alphaproteobacteria	o__unidentified_Alphaproteobacteria	f__unidentified_Alphaproteobacteria	g__Dongia	s__	0	12	0	0	0	0	0	0	0	0	0	0	0	0	0	0	0	0	0	0	0	0	0	0	0	1	0	0	0	0	0	0	0	0	0	0	0	0	0	0
OTU_1499	k__Bacteria	p__Proteobacteria	c__Gammaproteobacteria	o__Xanthomonadales	f__Rhodanobacteraceae	g__Chujaibacter	s__	0	1	6	0	0	0	0	0	0	0	0	0	0	0	0	0	0	0	0	0	0	0	0	0	0	0	0	0	0	0	0	0	0	0	0	0	0	0	0	0
OTU_1500	k__Bacteria	p__Firmicutes	c__Clostridia	o__Clostridiales	f__Lachnospiraceae	Others	Others	0	0	0	0	2	0	0	0	0	0	0	0	0	0	0	0	0	0	0	0	0	0	0	0	0	0	0	3	0	0	0	0	0	0	0	0	0	0	0	0
OTU_1502	k__Bacteria	p__Firmicutes	c__Clostridia	o__Clostridiales	f__Ruminococcaceae	Others	Others	0	0	0	0	0	2	0	0	0	0	0	0	0	0	0	0	0	0	0	0	0	0	0	0	0	0	0	0	0	0	0	0	0	0	0	0	0	0	0	0
OTU_1503	k__Bacteria	p__Firmicutes	c__Clostridia	o__Clostridiales	f__Lachnospiraceae	g__unidentified_Lachnospiraceae	s__Clostridium_sp_ASF502	1	2	0	8	0	0	3	2	6	5	6	6	12	0	4	15	3	0	2	0	6	2	16	5	2	11	5	43	11	6	14	3	9	1	6	0	4	4	1	3
OTU_1506	k__Bacteria	p__Actinobacteria	c__Rubrobacteria	o__Rubrobacterales	f__unidentified_Rubrobacterales	g__Rubrobacter	s__Rubrobacter_xylanophilus	0	0	0	0	0	0	0	0	0	0	0	0	0	0	0	0	0	0	0	0	0	0	0	0	0	0	0	0	0	0	0	0	0	0	4	0	0	0	0	0
OTU_1507	k__Bacteria	p__Firmicutes	c__Clostridia	o__Clostridiales	f__Lachnospiraceae	Others	Others	6	0	1	2	3	0	0	5	0	0	0	0	30	11	0	18	0	0	0	0	0	0	0	15	0	0	0	1	0	0	4	1	8	1	2	0	0	2	0	0
OTU_1509	k__Bacteria	p__Bacteroidetes	c__Bacteroidia	o__Bacteroidales	f__Bacteroidaceae	g__Bacteroides	s__Bacteroides_massiliensis	4	4	2	0	0	0	8	12	0	0	4	1	5	0	5	2	0	0	7	0	3	0	7	0	28	0	0	0	0	0	0	4	4	2	3	0	0	4	2	0
OTU_1510	k__Bacteria	p__Firmicutes	c__Clostridia	o__Clostridiales	f__Ruminococcaceae	Others	Others	0	0	0	0	0	4	0	0	0	0	2	0	11	3	3	3	0	0	0	1	0	0	0	0	1	4	0	38	3	0	0	0	3	0	0	0	0	0	0	0
OTU_1511	k__Bacteria	p__Proteobacteria	c__Gammaproteobacteria	o__Oceanospirillales	f__Halomonadaceae	g__Halomonas	Others	0	0	0	0	0	0	0	2	0	0	0	0	0	0	0	0	0	0	0	0	0	0	0	1	0	1	0	0	0	0	0	0	0	0	2	0	0	0	0	0
OTU_1512	k__Bacteria	p__Actinobacteria	c__unidentified_Actinobacteria	o__Bifidobacteriales	f__Bifidobacteriaceae	g__Bifidobacterium	Others	0	0	0	0	0	0	0	0	0	0	0	0	0	0	0	0	0	0	0	0	0	0	0	0	0	0	250	0	0	6	0	0	0	0	0	0	0	0	0	0
OTU_1513	k__Bacteria	Others	Others	Others	Others	Others	Others	0	0	0	0	0	0	0	0	0	0	0	0	0	0	0	0	0	0	0	0	0	0	0	0	0	0	0	0	0	0	0	0	0	0	0	0	0	0	0	0
OTU_1515	k__Bacteria	p__Firmicutes	c__Clostridia	o__Clostridiales	f__Lachnospiraceae	Others	Others	0	14	0	0	0	0	4	2	8	1	5	0	2	2	2	0	1	0	0	0	1	1	4	2	0	5	0	3	8	0	4	0	1	0	4	0	1	0	0	14
OTU_1516	k__Bacteria	p__Proteobacteria	c__Alphaproteobacteria	o__Rhizobiales	f__Rhizobiaceae	g__Mesorhizobium	Others	0	0	3	0	0	0	0	0	0	0	0	0	0	0	0	0	0	0	0	0	0	0	0	0	0	0	0	0	0	0	0	0	0	0	0	0	0	0	0	0
OTU_1517	k__Bacteria	p__Bacteroidetes	c__Bacteroidia	o__Bacteroidales	f__Muribaculaceae	g__	s__	0	0	0	0	0	0	0	0	0	0	0	0	0	0	0	0	2	0	0	0	0	0	0	0	0	0	0	0	0	0	0	0	0	0	0	0	0	0	0	0
OTU_1518	k__Bacteria	p__Proteobacteria	c__Alphaproteobacteria	o__Rhizobiales	f__Beijerinckiaceae	g__Methylobacterium	Others	0	0	0	0	0	0	0	0	0	0	0	0	0	0	0	0	0	0	0	0	0	0	0	0	0	0	0	0	0	0	0	0	0	0	0	0	0	0	0	0
OTU_1520	k__Bacteria	p__Bacteroidetes	c__Bacteroidia	o__Chitinophagales	f__Saprospiraceae	Others	Others	0	0	0	0	0	0	0	0	0	0	0	0	0	0	0	0	0	0	0	0	0	0	0	0	0	1	0	0	0	0	0	0	0	0	0	0	0	0	0	0
OTU_1521	k__Bacteria	p__Firmicutes	c__Erysipelotrichia	o__Erysipelotrichales	f__Erysipelotrichaceae	g__Dubosiella	s__	0	0	0	0	5	3	2	7	37	10	11	8	0	4	3	0	4	0	1	7	4	3	1	1	0	31	0	0	0	2	24	5	6	10	4	1	0	1	3	0
OTU_1523	k__Bacteria	p__Bacteroidetes	c__Bacteroidia	o__Bacteroidales	f__Muribaculaceae	g__	s__	0	0	0	0	0	0	0	0	0	0	0	0	0	0	0	0	8	0	0	0	0	0	0	0	0	0	0	0	0	0	0	0	0	0	0	0	0	0	0	0
OTU_1524	k__Bacteria	p__Proteobacteria	c__Alphaproteobacteria	o__Rhodobacterales	f__Rhodobacteraceae	g__Sulfitobacter	Others	0	0	0	0	0	0	0	0	0	0	0	0	0	0	0	0	0	0	0	0	0	1	0	0	0	0	0	0	0	0	0	0	0	0	0	0	0	0	0	0
OTU_1525	k__Bacteria	p__Bacteroidetes	c__Bacteroidia	o__Bacteroidales	Others	Others	Others	0	3	0	0	0	0	0	0	0	0	0	0	0	0	0	0	0	0	0	0	0	0	0	0	0	0	0	0	0	0	0	0	0	0	0	0	0	0	0	0
OTU_1526	k__Bacteria	p__Firmicutes	c__Bacilli	o__Lactobacillales	f__Lactobacillaceae	g__Lactobacillus	Others	0	0	6	0	8	4	3	9	12	14	75	69	10	56	18	49	13	4	14	14	15	56	46	10	34	12	73	53	93	87	18	240	18	14	3	3	3	12	7	38
OTU_1527	k__Bacteria	p__Firmicutes	c__Clostridia	o__Clostridiales	f__Lachnospiraceae	Others	Others	1	0	1	0	0	0	0	0	0	0	3	0	0	0	0	0	0	0	0	0	0	0	0	0	0	0	0	0	0	0	0	2	10	4	0	0	0	0	0	0
OTU_1528	k__Bacteria	p__Firmicutes	c__Clostridia	o__Clostridiales	f__Lachnospiraceae	Others	Others	0	3	0	0	0	0	0	0	0	0	0	0	0	0	0	0	2	0	0	0	0	0	0	0	0	0	0	0	0	0	0	0	0	0	0	0	0	0	0	0
OTU_1529	k__Bacteria	p__Firmicutes	c__Clostridia	o__Clostridiales	f__Ruminococcaceae	Others	Others	0	4	0	0	0	0	0	0	0	0	0	0	0	0	0	0	0	0	0	0	0	0	0	0	0	0	0	0	0	0	0	0	0	0	0	0	0	0	0	0
OTU_1530	k__Bacteria	p__Proteobacteria	c__Gammaproteobacteria	o__unidentified_Gammaproteobacteria	f__Burkholderiaceae	Others	Others	0	0	0	0	0	0	0	0	0	0	0	0	0	0	0	0	0	0	0	0	0	0	0	0	0	0	0	0	0	0	0	0	0	0	0	0	0	0	0	3
OTU_1532	k__Bacteria	p__Bacteroidetes	c__Bacteroidia	o__Bacteroidales	f__Muribaculaceae	g__	s__	4	0	0	0	0	0	0	4	0	0	0	0	0	2	0	0	0	0	0	0	3	0	0	0	2	2	0	0	0	0	0	1	1	0	0	0	0	0	0	0
OTU_1533	k__Bacteria	p__Firmicutes	c__Clostridia	o__Clostridiales	f__Lachnospiraceae	g__Lachnoclostridium	s__Clostridium_fusiformis	1	12	5	3	5	7	0	3	1	0	8	1	2	0	0	23	6	0	0	0	5	0	13	0	0	0	0	5	11	0	0	4	1	0	1	0	2	0	3	0
OTU_1535	k__Bacteria	p__Firmicutes	c__Clostridia	o__Clostridiales	f__unidentified_Clostridiales	g__unidentified_Clostridiales	s__Clostridium_sp_strain_P2	0	0	0	0	0	7	0	0	0	0	0	0	0	0	0	0	0	0	0	0	0	0	0	0	0	0	0	0	0	0	0	0	0	0	0	0	0	0	0	0
OTU_1536	k__Bacteria	p__Firmicutes	c__Clostridia	o__Clostridiales	f__unidentified_Clostridiales	g__unidentified_Clostridiales	Others	4	0	2	3	3	1	0	3	0	0	21	3	53	3	5	4	4	0	2	2	1	6	0	2	5	2	0	16	28	6	2	4	8	3	20	10	8	1	11	30
OTU_1539	k__Bacteria	p__Chloroflexi	c__Anaerolineae	o__Anaerolineales	f__Anaerolineaceae	g__Flexilinea	Others	0	0	0	0	0	18	0	0	0	0	0	0	0	2	0	0	0	0	0	0	0	0	0	0	0	0	0	0	0	0	0	0	0	0	0	0	0	0	0	0
OTU_1540	k__Bacteria	p__unidentified_Bacteria	c__unidentified_Bacteria	o__Campylobacterales	f__Helicobacteraceae	g__Helicobacter	Others	0	0	1	4	0	0	0	0	0	0	2	8	0	0	0	0	0	0	0	0	0	0	0	0	5	0	0	0	0	0	0	3	4	0	0	3	0	1	0	3
OTU_1541	k__Bacteria	p__Actinobacteria	c__unidentified_Actinobacteria	o__Propionibacteriales	f__Nocardioidaceae	g__Nocardioides	Others	0	2	0	0	0	0	0	0	0	0	0	0	0	0	0	0	0	0	0	0	0	0	0	0	0	0	0	0	0	0	0	0	2	0	0	0	0	0	0	0
OTU_1543	k__Bacteria	p__Firmicutes	c__Clostridia	o__Clostridiales	f__Lachnospiraceae	Others	Others	11	1	0	0	1	0	14	0	0	0	0	0	0	0	0	4	5	0	8	9	0	0	0	0	0	4	0	0	8	0	0	2	0	2	34	0	0	1	3	0
OTU_1544	k__Bacteria	p__Firmicutes	c__Erysipelotrichia	o__Erysipelotrichales	f__Erysipelotrichaceae	g__Faecalibaculum	Others	0	0	0	0	2	6	0	3	6	195	54	23	4	0	0	1	4	1	16	95	0	1	11	0	0	4	1	0	0	84	3	28	0	2	0	0	86	31	46	0
OTU_1545	k__Bacteria	p__Proteobacteria	c__Gammaproteobacteria	o__unidentified_Gammaproteobacteria	f__unidentified_Gammaproteobacteria	g__Acidibacter	s__bacterium_Ellin5264	0	0	0	0	0	0	0	0	0	0	0	0	0	0	0	0	0	0	0	0	0	0	0	0	0	0	0	0	0	0	0	0	0	0	0	0	0	0	0	1
OTU_1546	k__Bacteria	p__Bacteroidetes	c__Bacteroidia	o__Bacteroidales	f__Barnesiellaceae	g__Coprobacter	s__	0	0	0	0	0	0	0	0	0	0	0	0	0	0	0	0	0	0	0	0	0	0	0	0	0	0	0	0	0	0	0	0	0	0	0	0	0	0	0	0
OTU_1547	k__Bacteria	p__Bacteroidetes	c__Bacteroidia	o__Bacteroidales	f__Prevotellaceae	g__unidentified_Prevotellaceae	s__Prevotellaceae_bacterium_DJF_VR15	0	2	0	0	0	0	0	0	0	0	0	0	0	0	0	0	0	0	0	0	0	0	0	0	0	0	0	0	0	0	0	0	0	0	0	0	0	0	0	0
OTU_1548	k__Bacteria	p__Proteobacteria	c__Gammaproteobacteria	o__Xanthomonadales	f__Xanthomonadaceae	Others	Others	0	1	0	0	0	0	0	0	0	0	0	3	0	0	0	0	0	0	0	0	0	0	0	0	0	0	0	0	0	0	0	0	0	0	2	0	0	0	0	0
OTU_1549	k__Bacteria	p__Proteobacteria	c__Deltaproteobacteria	o__Desulfovibrionales	f__Desulfovibrionaceae	g__Desulfovibrio	Others	19	64	21	37	145	113	15	31	31	69	70	89	18	97	19	66	77	31	68	61	124	111	55	22	5	13	5	174	225	44	79	109	16	24	64	15	43	98	71	90
OTU_1550	k__Bacteria	p__Bacteroidetes	c__Bacteroidia	o__Bacteroidales	f__Muribaculaceae	g__	s__	0	2	0	0	0	0	0	0	0	0	0	0	0	0	0	0	0	0	6	0	0	0	0	0	0	0	0	0	2	2	0	0	0	0	0	61	10	0	1	0
OTU_1551	k__Bacteria	p__Proteobacteria	c__Alphaproteobacteria	o__Rhizobiales	f__Xanthobacteraceae	g__Pseudolabrys	s__	0	13	0	0	0	0	0	0	0	0	0	0	0	0	0	0	0	0	0	0	0	0	0	0	0	0	0	0	0	0	0	0	2	0	0	0	0	0	0	0
OTU_1552	k__Bacteria	p__Proteobacteria	c__Deltaproteobacteria	o__Desulfobacterales	f__Desulfobulbaceae	g__Desulfobulbus	s__	0	0	0	0	0	1	0	0	0	0	0	0	0	0	0	0	0	0	0	0	0	0	0	0	0	0	0	0	0	0	0	0	0	0	0	0	0	0	0	0
OTU_1555	k__Bacteria	p__Firmicutes	c__Bacilli	o__Lactobacillales	f__Lactobacillaceae	g__Lactobacillus	Others	1	1	0	4	0	0	0	0	1	4	1	2	8	3	0	8	2	0	5	0	0	2	0	0	5	9	4	0	19	10	3	10	0	2	0	2	0	0	2	5
OTU_1556	k__Bacteria	p__Firmicutes	c__Clostridia	o__Clostridiales	f__Lachnospiraceae	g__Howardella	Others	0	0	0	0	0	0	0	0	0	0	0	0	0	0	0	0	0	0	0	0	0	0	1	0	0	0	0	0	0	0	0	0	0	0	0	0	0	0	0	0
OTU_1558	k__Bacteria	Others	Others	Others	Others	Others	Others	0	0	0	0	0	0	0	2	0	0	0	0	0	0	0	0	0	0	0	0	0	0	0	0	0	0	0	4	0	0	0	0	0	0	0	0	0	0	0	0
OTU_1560	k__Bacteria	p__Bacteroidetes	c__Bacteroidia	o__Bacteroidales	f__Muribaculaceae	g__	s__	1	0	1	0	2	0	0	0	0	0	1	0	0	0	0	0	0	0	0	0	1	0	1	0	0	0	0	1	0	0	0	0	1	0	6	0	0	0	2	0
OTU_1561	k__Bacteria	p__Firmicutes	c__Clostridia	o__Clostridiales	f__Christensenellaceae	Others	Others	1	15	10	0	7	3	1	4	1	15	60	10	77	2	3	32	1	5	87	0	0	0	3	2	0	17	9	2	16	1	0	0	0	3	2	35	28	4	0	12
OTU_1562	k__Bacteria	p__Firmicutes	c__Clostridia	o__Clostridiales	f__Ruminococcaceae	Others	Others	0	4	0	0	0	0	0	0	0	0	0	0	0	0	0	0	0	0	0	0	0	0	0	0	0	0	0	0	0	0	0	0	0	0	0	0	0	0	0	0
OTU_1565	k__Bacteria	p__Spirochaetes	c__Spirochaetia	o__Spirochaetales	f__Spirochaetaceae	g__	s__	0	0	0	0	0	0	0	0	0	0	0	0	0	0	0	0	1	0	0	0	0	0	0	0	0	0	0	1	0	0	0	0	0	0	0	0	0	0	0	0
OTU_1567	k__Bacteria	p__Firmicutes	c__Clostridia	o__Clostridiales	f__Ruminococcaceae	Others	Others	1	0	1	0	21	1	0	1	0	0	0	0	0	1	0	0	0	0	0	0	0	2	0	0	0	0	0	0	0	1	0	1	0	0	0	0	0	1	0	0
OTU_1568	k__Bacteria	p__Proteobacteria	c__Gammaproteobacteria	o__unidentified_Gammaproteobacteria	f__Burkholderiaceae	g__Lautropia	s__	0	0	4	0	0	0	0	0	0	0	0	0	0	0	0	0	0	0	0	0	0	0	0	0	0	0	0	0	0	0	0	0	3	0	0	0	0	0	0	0
OTU_1569	k__Bacteria	p__Bacteroidetes	c__Bacteroidia	o__Flavobacteriales	f__unidentified_Flavobacteriales	g__Bergeyella	s__	0	0	2	0	0	0	0	0	0	0	0	0	0	0	0	0	0	0	0	0	0	0	0	0	0	0	0	0	0	0	0	0	0	0	0	0	0	0	0	0
OTU_1570	k__Bacteria	p__Proteobacteria	c__Alphaproteobacteria	o__Micropepsales	f__Micropepsaceae	g__	s__	0	6	0	0	0	0	0	0	0	0	0	0	0	0	0	0	0	0	0	0	0	0	0	0	0	0	0	0	0	0	0	0	0	0	0	0	0	0	0	0
OTU_1571	k__Bacteria	p__Proteobacteria	c__Gammaproteobacteria	o__unidentified_Gammaproteobacteria	f__Burkholderiaceae	g__Parasutterella	Others	84	3	1	1	9	2	0	1	0	0	53	0	10	0	3	2	0	5	2	4	1	0	2	0	10	6	0	0	0	0	0	5	0	10	2	2	0	5	24	0
OTU_1572	k__Bacteria	p__Firmicutes	c__Bacilli	o__Bacillales	f__Paenibacillaceae	g__Paenibacillus	s__Paenibacillus_barcinonensis	0	0	2	0	0	0	0	0	0	0	0	0	0	0	0	0	0	0	0	0	0	0	0	0	0	0	0	0	2	0	0	0	0	0	0	0	0	0	0	0
OTU_1573	k__Bacteria	p__Firmicutes	c__Clostridia	o__Clostridiales	f__Lachnospiraceae	Others	Others	2	5	4	11	2	15	10	1	26	4	47	654	29	38	5	1	129	3	5	8	69	74	45	4	5	3	6	64	37	16	28	8	12	89	20	8	26	7	4	29
OTU_1575	k__Bacteria	p__Bacteroidetes	c__Bacteroidia	o__Bacteroidales	f__Muribaculaceae	g__	s__	9	1	1	4	0	0	0	3	0	0	0	0	0	0	0	2	0	0	5	0	1	3	3	0	0	0	0	0	0	0	0	0	2	0	5	4	1	0	4	4
OTU_1576	k__Bacteria	p__Firmicutes	c__Clostridia	o__Clostridiales	f__unidentified_Clostridiales	g__Tepidimicrobium	Others	0	7	0	0	0	0	0	0	0	0	0	0	0	0	0	0	0	0	0	0	0	0	0	0	0	0	0	0	0	0	0	0	0	0	0	0	0	0	0	0
OTU_1577	k__Bacteria	p__Bacteroidetes	c__Bacteroidia	o__Bacteroidales	f__Muribaculaceae	g__	s__	0	0	0	0	0	0	1	4	0	0	0	0	0	0	3	0	0	0	0	0	1	0	0	0	0	0	0	2	0	0	0	0	0	0	3	0	0	0	0	0
OTU_1578	k__Bacteria	p__Firmicutes	c__Clostridia	o__Clostridiales	f__Lachnospiraceae	Others	Others	0	0	0	0	0	0	0	12	0	0	0	0	0	0	0	0	0	0	0	0	0	0	0	0	0	0	0	0	0	0	0	2	0	0	0	0	0	0	0	0
OTU_1579	k__Bacteria	p__Proteobacteria	c__Alphaproteobacteria	o__Micropepsales	f__Micropepsaceae	g__	s__	0	4	0	0	0	0	0	0	0	0	0	0	0	0	0	0	0	0	0	0	0	0	0	0	0	0	0	0	0	0	0	0	0	0	0	0	0	0	0	0
OTU_1580	k__Bacteria	p__Proteobacteria	c__Gammaproteobacteria	o__unidentified_Gammaproteobacteria	f__Rhodocyclaceae	g__Azoarcus	s__	0	0	0	0	0	0	0	0	0	0	0	0	0	0	0	0	0	0	0	0	0	0	0	0	0	0	0	0	0	0	0	0	2	0	0	0	0	0	0	0
OTU_1581	k__Bacteria	p__Bacteroidetes	c__Bacteroidia	o__Bacteroidales	f__Muribaculaceae	g__	s__	0	0	0	0	0	0	0	0	0	0	0	0	0	0	0	1	0	0	0	0	1	0	0	0	0	0	0	0	0	0	0	0	0	0	0	0	0	0	0	0
OTU_1583	k__Bacteria	p__Firmicutes	c__Clostridia	o__Clostridiales	f__Lachnospiraceae	Others	Others	0	0	0	0	0	0	0	0	0	0	0	7	0	0	1	0	0	0	4	0	0	0	0	0	0	0	0	2	3	0	0	0	0	0	0	0	0	0	0	0
OTU_1584	k__Bacteria	p__Actinobacteria	c__Thermoleophilia	Others	Others	Others	Others	0	2	0	0	0	0	0	0	0	0	0	0	0	0	0	0	0	0	0	0	0	0	0	0	0	0	0	0	0	0	0	0	0	0	0	0	0	0	0	0
OTU_1585	k__Bacteria	p__Bacteroidetes	c__Bacteroidia	o__Bacteroidales	f__Muribaculaceae	g__	s__	0	0	0	0	0	0	0	0	0	0	0	0	0	0	0	0	5	0	0	0	0	0	0	0	0	0	0	0	0	0	0	0	0	0	0	0	0	0	0	0
OTU_1586	k__Bacteria	p__Proteobacteria	c__Deltaproteobacteria	o__	f__	g__	s__	0	1	0	0	2	0	0	0	0	0	0	0	0	0	0	0	0	0	0	0	0	0	0	0	0	0	0	0	0	0	0	0	0	0	0	0	0	0	0	0
OTU_1588	k__Bacteria	p__Firmicutes	c__Clostridia	o__Clostridiales	f__Lachnospiraceae	g__Roseburia	Others	10	2	0	5	1	0	0	44	0	0	2	0	5	98	467	25	523	10	0	71	129	6	0	55	0	0	0	455	0	0	0	10	2	32	13	0	0	2	75	2
OTU_1589	k__Bacteria	p__Proteobacteria	c__Gammaproteobacteria	o__Enterobacteriales	f__Enterobacteriaceae	Others	Others	0	0	3	0	0	0	2	5	4	0	0	0	0	0	0	0	0	0	0	0	0	0	4	0	0	0	0	0	0	0	0	0	0	1	0	0	0	0	10	0
OTU_1591	k__Bacteria	p__Tenericutes	c__Mollicutes	o__	f__	g__	s__	0	0	0	0	0	0	0	0	0	0	11	0	0	0	0	1	0	0	0	0	0	0	2	0	0	0	0	11	0	0	0	0	0	0	1	0	0	0	0	0
OTU_1593	k__Bacteria	p__unidentified_Bacteria	c__unidentified_Bacteria	o__Campylobacterales	f__Helicobacteraceae	g__Helicobacter	s__Helicobacter_typhlonius	0	0	0	0	0	0	0	1	0	0	0	0	0	0	0	0	0	0	0	0	0	0	0	0	0	0	0	0	0	0	0	0	0	0	0	0	0	0	0	0
OTU_1594	k__Bacteria	p__Firmicutes	c__Bacilli	o__Lactobacillales	f__Lactobacillaceae	g__Lactobacillus	Others	0	24	0	0	5	15	0	4	29	31	5	4	141	2	0	6	1	0	163	12	0	4	0	1	6	11	171	2	164	744	36	4	1	13	0	20	35	0	4	14
OTU_1596	k__Bacteria	p__Proteobacteria	c__Gammaproteobacteria	o__unidentified_Gammaproteobacteria	f__Burkholderiaceae	g__Limnobacter	Others	0	0	0	0	0	0	0	0	0	0	0	0	0	0	0	0	0	0	0	0	0	0	0	0	0	0	0	2	2	0	0	0	0	0	0	0	1	0	0	3
OTU_1597	k__Bacteria	p__Elusimicrobia	c__unidentified_Elusimicrobia	o__Elusimicrobiales	f__Elusimicrobiaceae	g__Elusimicrobium	s__	0	5	0	0	0	0	0	0	0	0	0	0	0	0	0	0	0	0	0	0	0	0	0	0	0	0	0	0	0	0	0	0	0	0	0	0	0	0	0	0
OTU_1598	k__Bacteria	p__Proteobacteria	c__Gammaproteobacteria	o__Vibrionales	f__Vibrionaceae	g__Photobacterium	s__Photobacterium_kishitanii	0	0	0	0	0	0	0	0	2	0	0	0	0	0	0	0	2	0	0	0	0	3	0	0	0	0	0	1	0	0	0	0	0	0	0	0	0	0	0	0
OTU_1599	k__Bacteria	p__Chloroflexi	c__Anaerolineae	o__Anaerolineales	f__Anaerolineaceae	g__Anaerolinea	s__	0	0	0	0	0	10	0	0	0	0	0	0	0	0	0	0	0	0	0	0	0	0	0	0	0	0	0	0	0	0	0	0	0	0	0	0	0	0	0	0
OTU_1600	k__Bacteria	p__Firmicutes	c__Clostridia	o__Clostridiales	f__Lachnospiraceae	Others	Others	0	1	0	0	0	0	0	0	0	0	0	0	0	0	0	0	46	0	0	0	0	0	0	0	0	0	0	0	0	0	0	0	0	0	0	0	0	2	0	0
OTU_1601	k__Bacteria	p__Firmicutes	c__Clostridia	o__Clostridiales	f__Lachnospiraceae	Others	Others	0	2	0	0	4	4	0	0	0	0	0	0	0	0	8	0	12	0	0	0	0	0	0	0	0	0	0	0	0	0	0	0	0	0	3	0	0	0	0	0
OTU_1603	k__Bacteria	p__Firmicutes	c__Clostridia	o__Clostridiales	f__Ruminococcaceae	g__Ruminiclostridium	s__iron-reducing_bacterium_enrichment_culture_clone_HN-HFO106	0	0	0	0	0	4	0	0	0	0	0	0	0	0	0	0	0	0	0	0	0	0	0	0	0	0	0	0	0	0	0	0	0	0	0	0	0	0	0	0
OTU_1604	k__Bacteria	p__unidentified_Bacteria	c__unidentified_Bacteria	o__unidentified_Bacteria	f__unidentified_Bacteria	g__Candidatus_Saccharimonas	s__	0	0	0	0	0	0	2	0	0	0	0	0	0	0	0	0	6	0	4	0	2	0	0	0	0	0	0	0	2	0	0	0	0	0	0	0	0	0	0	1
OTU_1605	k__Bacteria	p__Firmicutes	c__Clostridia	o__Clostridiales	f__Ruminococcaceae	Others	Others	0	0	0	0	0	0	0	0	0	0	0	0	0	0	0	0	0	0	0	0	0	0	0	0	0	0	0	0	43	0	0	0	0	0	0	0	0	0	0	0
OTU_1606	k__Bacteria	p__Firmicutes	c__Clostridia	o__Clostridiales	f__Lachnospiraceae	Others	Others	0	3	0	0	1	1	0	2	0	2	0	0	9	0	0	10	4	0	0	0	2	0	0	0	3	0	0	7	0	0	2	0	0	0	0	0	0	0	0	0
OTU_1607	k__Bacteria	p__Firmicutes	c__Erysipelotrichia	o__Erysipelotrichales	f__Erysipelotrichaceae	g__Dubosiella	s__	213	56	93	37	688	338	138	418	7	158	137	10	0	51	1	467	169	42	349	12	38	71	33	74	2	10	12	17	257	39	2	7	2	193	0	239	170	115	22	471
OTU_1608	k__Bacteria	p__Tenericutes	c__Mollicutes	o__	f__	g__	s__	0	0	2	0	0	0	0	0	0	0	0	0	0	0	0	154	0	0	0	0	3	0	0	0	5	0	4	0	4	0	0	0	0	0	0	0	0	0	0	0
OTU_1610	k__Bacteria	p__Firmicutes	c__Clostridia	o__Clostridiales	f__Lachnospiraceae	g__unidentified_Lachnospiraceae	Others	0	0	0	0	0	0	0	0	0	0	0	0	0	0	0	0	3	0	0	0	0	0	0	0	0	0	0	0	0	0	0	0	0	0	0	0	0	0	0	0
OTU_1613	k__Bacteria	p__Tenericutes	c__Mollicutes	o__	f__	g__	s__	0	0	2	0	0	0	0	0	0	0	0	0	5	5	0	2	1	2	0	2	0	0	0	0	0	0	0	6	0	0	0	0	6	0	0	0	0	6	1	0
OTU_1614	k__Bacteria	p__Firmicutes	c__Clostridia	o__Clostridiales	f__Ruminococcaceae	Others	Others	17	5	54	23	4	28	12	13	0	0	1	3	11	90	57	5	6	1	2	3	4	11	1	6	6	7	0	54	139	0	5	3	5	2	2	0	0	0	4	103
OTU_1615	k__Bacteria	p__Proteobacteria	c__Deltaproteobacteria	o__	f__	g__	s__	0	0	0	0	0	0	0	0	0	0	0	0	2	0	0	0	0	0	0	0	0	0	0	0	0	0	0	0	0	0	0	0	1	0	0	0	0	0	0	0
OTU_1616	k__Bacteria	p__Firmicutes	c__Clostridia	o__Clostridiales	f__Christensenellaceae	g__	s__	0	0	0	0	0	0	0	0	0	0	0	0	0	0	0	0	2	0	0	0	0	0	0	0	0	0	0	0	0	0	0	0	0	0	0	0	0	0	0	0
OTU_1618	k__Bacteria	p__Bacteroidetes	c__Bacteroidia	o__Bacteroidales	f__Muribaculaceae	g__	s__	0	0	0	0	4	0	0	0	0	0	0	0	0	0	0	0	4	0	0	0	0	0	0	0	0	0	0	0	0	0	0	0	0	0	0	0	0	0	0	0
OTU_1620	k__Bacteria	p__Firmicutes	c__Clostridia	o__Clostridiales	f__Lachnospiraceae	Others	Others	0	59	0	1	2	0	2	8	0	0	0	0	0	0	0	0	0	0	0	0	0	0	7	0	0	0	0	0	25	0	0	2	15	0	0	0	0	0	0	0
OTU_1621	k__Bacteria	p__Firmicutes	c__Erysipelotrichia	o__Erysipelotrichales	f__Erysipelotrichaceae	g__Dubosiella	s__	2	3	0	1	9	7	3	9	64	14	113	6	5	7	13	1	2	0	4	17	4	0	7	17	0	88	1	0	0	0	43	7	4	4	5	3	0	1	14	0
OTU_1622	k__Bacteria	p__Tenericutes	c__Mollicutes	o__	f__	g__	s__	0	0	0	0	0	0	0	0	0	0	0	0	0	0	0	0	0	0	0	0	0	0	0	0	0	0	0	0	5	0	0	0	0	0	0	0	0	0	0	0
OTU_1623	k__Bacteria	p__Firmicutes	c__Erysipelotrichia	o__Erysipelotrichales	f__Erysipelotrichaceae	g__Ileibacterium	s__Ileibacterium_valens	17	16	26	41	11	6	0	14	14	16	0	0	0	27	7	0	8	37	5	33	35	17	0	11	0	1	3	0	0	0	14	0	0	19	0	0	9	31	7	0
OTU_1624	k__Bacteria	p__Firmicutes	c__Clostridia	o__Clostridiales	f__Lachnospiraceae	Others	Others	0	0	0	0	0	0	0	0	3	0	0	0	0	0	0	0	0	0	0	0	0	0	0	0	0	0	0	0	0	0	0	0	0	0	0	0	0	0	0	0
OTU_1626	k__Bacteria	p__Firmicutes	c__Clostridia	o__Clostridiales	f__Ruminococcaceae	Others	Others	0	0	3	0	0	0	6	0	0	0	0	0	0	32	0	1	0	0	0	0	0	0	3	3	1	3	1	0	55	0	0	0	0	0	0	0	0	8	0	37
OTU_1627	k__Bacteria	p__Bacteroidetes	c__Bacteroidia	o__Bacteroidales	f__Muribaculaceae	g__	s__	0	0	0	0	0	0	0	0	0	0	0	0	0	0	0	0	4	0	0	0	0	0	0	0	0	0	0	0	0	0	0	0	0	0	0	0	0	0	0	0
OTU_1628	k__Bacteria	p__Proteobacteria	c__Alphaproteobacteria	o__unidentified_Alphaproteobacteria	f__unidentified_Alphaproteobacteria	Others	Others	0	6	0	0	0	1	0	0	0	0	0	0	0	0	0	0	0	0	0	0	0	0	0	0	0	0	0	0	0	0	0	0	0	0	0	0	0	0	0	0
OTU_1631	k__Bacteria	p__Firmicutes	c__Clostridia	o__Clostridiales	f__Lachnospiraceae	Others	Others	0	0	0	0	0	0	0	0	0	0	0	0	0	0	0	0	0	0	0	0	0	0	0	0	0	0	0	0	2	0	0	0	0	0	0	0	0	0	0	0
OTU_1632	k__Bacteria	p__Proteobacteria	c__Gammaproteobacteria	o__Xanthomonadales	f__Xanthomonadaceae	g__Pseudoxanthomonas	Others	0	0	0	0	0	0	0	0	0	0	0	0	0	0	0	0	0	0	0	0	0	0	0	0	0	0	0	0	0	0	0	0	3	0	0	0	0	0	0	0
OTU_1633	k__Bacteria	p__Firmicutes	c__Clostridia	o__Clostridiales	f__Ruminococcaceae	Others	Others	0	0	0	0	0	0	0	0	0	0	0	0	0	0	2	0	0	0	0	0	0	0	0	0	0	0	0	0	0	0	0	0	0	0	0	0	0	0	0	0
OTU_1635	k__Bacteria	p__Gemmatimonadetes	c__unidentified_Gemmatimonadetes	o__Gemmatimonadales	f__Gemmatimonadaceae	g__	s__	0	6	0	0	0	0	0	0	0	0	0	0	0	0	0	0	0	0	0	0	0	0	0	4	0	0	0	0	0	1	0	0	0	0	0	0	0	0	0	0
OTU_1637	k__Bacteria	p__Firmicutes	c__Erysipelotrichia	o__Erysipelotrichales	f__Erysipelotrichaceae	g__Dubosiella	s__	0	0	0	2	0	0	0	0	4	1	0	2	0	0	0	0	0	0	0	2	0	0	0	0	0	3	3	0	0	0	5	0	0	3	0	0	0	0	0	0
OTU_1638	k__Bacteria	p__Proteobacteria	c__Alphaproteobacteria	o__unidentified_Alphaproteobacteria	Others	Others	Others	0	5	0	0	0	0	0	0	0	0	0	0	0	0	0	0	0	0	0	0	0	0	0	0	0	0	0	0	0	0	0	0	0	0	0	0	0	0	0	0
OTU_1639	k__Bacteria	p__Actinobacteria	c__Acidimicrobiia	o__Actinomarinales	f__	g__	s__	0	0	0	0	0	0	0	0	0	0	0	0	0	0	0	0	0	0	0	0	0	0	0	0	0	0	0	0	0	0	0	0	0	0	0	0	0	0	0	0
OTU_1643	k__Bacteria	p__Bacteroidetes	c__Bacteroidia	o__Bacteroidales	f__Bacteroidaceae	g__Bacteroides	s__Bacteroides_acidifaciens	96	7	3	6	1	0	31	11	0	1	10	0	19	2	6	10	14	8	19	20	7	3	2	3	122	5	1	11	13	4	0	0	20	6	35	13	27	9	36	15
OTU_1644	k__Bacteria	p__Proteobacteria	c__Gammaproteobacteria	o__unidentified_Gammaproteobacteria	f__Burkholderiaceae	Others	Others	0	0	0	0	0	0	0	0	0	0	0	0	0	0	0	0	0	0	0	0	0	0	0	0	1	0	0	0	0	0	0	0	1	0	0	0	0	0	2	1
OTU_1646	k__Bacteria	p__Firmicutes	c__Clostridia	o__Clostridiales	f__Ruminococcaceae	Others	Others	0	0	0	0	0	0	0	0	0	0	0	0	0	0	0	1	0	0	0	0	0	0	0	0	6	0	0	0	0	0	0	0	0	0	0	0	0	0	0	0
OTU_1647	k__Bacteria	p__Proteobacteria	c__Deltaproteobacteria	o__Syntrophobacterales	f__Syntrophaceae	g__Syntrophus	Others	0	0	0	0	0	4	0	0	0	0	0	0	0	0	0	0	0	0	0	0	0	0	0	0	0	0	0	0	0	0	0	0	0	0	0	0	0	0	0	0
OTU_1648	k__Bacteria	p__Firmicutes	c__Clostridia	o__Thermoanaerobacterales	f__Thermoanaerobacteraceae	g__Gelria	s__	0	0	0	0	0	1	0	0	0	0	0	0	0	0	0	0	0	0	0	0	0	0	0	0	0	0	0	0	0	0	0	0	0	0	0	0	0	0	0	0
OTU_1649	k__Bacteria	p__Acidobacteria	c__unidentified_Acidobacteria	o__unidentified_Acidobacteria	f__unidentified_Acidobacteria	g__unidentified_Acidobacteria	s__Aminicenantes_bacterium_clone_OPB95	0	0	0	0	0	9	0	0	0	0	0	0	0	0	0	0	0	0	0	0	0	0	0	0	0	0	0	0	0	0	0	0	0	0	0	0	0	0	0	0
OTU_1651	k__Bacteria	p__Bacteroidetes	c__Bacteroidia	o__Bacteroidales	f__Muribaculaceae	g__	s__	15	0	1	0	2	1	0	1	1	3	1	6	5	0	4	14	3	4	4	2	6	0	0	3	9	4	0	0	4	1	0	0	5	1	11	7	5	2	4	3
OTU_1653	k__Bacteria	p__Chloroflexi	c__Anaerolineae	o__Anaerolineales	f__Anaerolineaceae	g__	s__	0	0	0	0	0	0	0	0	0	0	0	0	0	0	0	0	0	0	0	0	0	0	0	0	0	0	0	0	0	0	0	0	0	0	1	0	0	0	0	0
OTU_1655	k__Bacteria	p__Firmicutes	c__Erysipelotrichia	o__Erysipelotrichales	f__Erysipelotrichaceae	g__Faecalibaculum	Others	1	2	0	0	1	0	0	0	26	1	0	0	0	5	0	33	6	0	1	0	0	0	0	0	0	10	3	0	0	42	17	0	0	4	0	0	21	1	3	0
OTU_1656	k__Bacteria	p__Firmicutes	c__Erysipelotrichia	o__Erysipelotrichales	f__Erysipelotrichaceae	g__Ileibacterium	s__Ileibacterium_valens	22	82	24	32	4	17	0	4	26	17	2	0	0	18	5	0	3	71	6	57	28	27	0	32	0	2	23	0	0	0	19	1	0	22	0	0	47	22	31	0
OTU_1657	k__Bacteria	p__Bacteroidetes	c__Bacteroidia	o__Bacteroidales	f__Bacteroidaceae	g__Bacteroides	s__Bacteroides_acidifaciens	36	0	0	1	1	0	12	1	0	0	3	1	5	0	0	7	5	2	12	9	4	1	1	0	40	3	1	4	4	0	0	0	3	5	10	2	12	3	28	3
OTU_1658	k__Bacteria	p__Firmicutes	c__Clostridia	o__Clostridiales	f__Lachnospiraceae	g__Roseburia	s__Eubacterium_plexicaudatum	0	0	0	0	0	0	0	2	0	0	0	0	0	5	0	27	0	0	0	0	0	0	0	0	1	12	6	0	6	1	0	2	1	0	7	30	0	0	0	1
OTU_1659	k__Bacteria	p__Firmicutes	c__Erysipelotrichia	o__Erysipelotrichales	f__Erysipelotrichaceae	g__Dubosiella	s__	77	31	4	5	167	92	8	81	1	36	34	1	0	10	0	139	8	11	99	3	5	9	4	9	1	3	0	5	0	0	0	0	0	36	0	0	1	20	4	0
OTU_1660	k__Bacteria	p__Firmicutes	c__Clostridia	o__Clostridiales	Others	Others	Others	0	0	0	0	0	0	4	0	0	0	0	1	0	0	0	0	0	0	0	0	0	0	0	0	0	0	0	0	0	0	0	0	0	0	0	0	0	0	0	0
OTU_1661	k__Bacteria	p__Firmicutes	c__Clostridia	o__Clostridiales	f__Lachnospiraceae	Others	Others	0	0	0	0	1	1	7	1	0	0	0	0	0	2	0	0	13	3	0	0	0	19	0	48	0	0	0	23	5	0	0	0	0	0	6	7	0	0	0	3
OTU_1662	k__Bacteria	p__Firmicutes	c__Erysipelotrichia	o__Erysipelotrichales	f__Erysipelotrichaceae	g__Dubosiella	s__	0	0	0	0	2	2	0	1	0	3	3	1	0	0	2	0	0	0	0	2	0	0	0	1	0	2	0	0	0	0	2	0	0	1	0	0	1	1	0	0
OTU_1663	k__Bacteria	p__unidentified_Bacteria	c__unidentified_Bacteria	o__Campylobacterales	f__Helicobacteraceae	g__Helicobacter	Others	0	0	0	0	0	0	0	7	0	0	0	0	4	0	0	0	0	0	0	0	0	0	0	0	0	0	0	0	0	0	0	0	0	0	0	0	0	0	0	0
OTU_1665	k__Bacteria	p__Proteobacteria	c__Deltaproteobacteria	Others	Others	Others	Others	0	3	0	0	0	0	0	0	0	0	0	0	0	0	0	0	0	0	0	0	0	0	0	0	0	0	0	0	0	0	0	0	0	0	0	0	0	0	0	0
OTU_1666	k__Bacteria	p__Firmicutes	c__Clostridia	o__Clostridiales	f__Ruminococcaceae	Others	Others	5	10	11	4	0	5	0	1	0	5	4	7	11	9	18	2	14	4	3	0	3	3	3	2	2	10	0	26	6	5	1	34	44	4	13	3	0	6	0	0
OTU_1667	k__Bacteria	p__Proteobacteria	c__Alphaproteobacteria	o__Rhizobiales	f__Hyphomicrobiaceae	g__Hyphomicrobium	Others	0	1	0	0	0	0	0	0	0	0	0	0	0	0	0	0	0	0	0	0	0	0	0	0	0	0	0	0	0	0	0	0	0	0	0	0	0	0	0	0
OTU_1669	k__Bacteria	p__Melainabacteria	c__	o__	f__	g__	s__	0	18	0	0	0	0	0	0	0	0	0	0	0	0	0	0	0	0	0	0	0	0	0	0	0	0	0	0	0	0	0	0	0	0	0	0	0	0	0	0
OTU_1670	k__Archaea	p__Euryarchaeota	c__Methanobacteria	o__Methanobacteriales	f__Methanobacteriaceae	g__Methanobacterium	Others	0	0	0	0	0	23	0	0	0	0	0	0	0	0	0	0	0	0	0	0	0	0	0	0	0	0	0	0	0	0	0	0	0	0	0	0	0	0	0	0
OTU_1671	k__Bacteria	Others	Others	Others	Others	Others	Others	0	4	0	0	0	0	0	0	0	0	0	0	0	0	0	0	0	0	0	0	0	0	0	0	0	0	0	0	0	0	0	0	0	0	0	0	0	0	0	0
OTU_1672	k__Bacteria	p__Firmicutes	c__Clostridia	o__Clostridiales	f__Syntrophomonadaceae	g__Syntrophomonas	Others	0	0	0	0	0	4	0	0	0	0	0	0	0	0	0	0	0	0	0	0	0	0	0	0	0	0	0	0	0	0	0	0	0	0	0	0	0	0	0	0
OTU_1674	k__Bacteria	p__Firmicutes	c__Clostridia	o__	f__	g__	s__	0	0	0	0	0	5	0	0	0	0	0	0	0	0	0	0	0	0	0	0	0	0	0	0	0	0	0	0	0	0	0	0	0	0	0	0	0	0	0	0
OTU_1676	k__Bacteria	p__Bacteroidetes	c__Bacteroidia	o__Flavobacteriales	f__Cryomorphaceae	g__	s__	0	0	0	0	0	0	0	0	0	0	0	0	2	0	0	0	0	0	0	0	0	0	0	0	0	0	0	0	0	0	0	0	0	0	0	0	0	0	0	0
OTU_1678	k__Bacteria	p__Firmicutes	c__Clostridia	o__Clostridiales	f__Ruminococcaceae	Others	Others	0	1	0	0	1	0	1	4	5	1	0	0	6	2	0	8	3	14	8	0	0	3	4	2	1	0	0	0	5	0	6	2	5	0	9	0	3	4	3	0
OTU_1679	k__Bacteria	p__Bacteroidetes	c__Bacteroidia	o__Bacteroidales	f__Paludibacteraceae	g__Paludibacter	s__	0	0	0	0	0	14	0	0	0	0	0	0	0	0	0	0	0	0	0	0	0	0	0	0	0	0	0	0	0	0	0	0	0	0	0	0	0	0	0	0
OTU_1681	k__Bacteria	p__Firmicutes	c__Erysipelotrichia	o__Erysipelotrichales	f__Erysipelotrichaceae	g__Dubosiella	s__	1	13	0	0	42	46	6	24	282	96	267	34	2	13	5	2	7	1	55	41	10	10	12	36	0	192	14	0	0	2	167	17	9	59	6	18	7	2	54	4
OTU_1683	k__Bacteria	p__Bacteroidetes	c__Bacteroidia	o__Bacteroidales	f__Muribaculaceae	Others	Others	415	44	64	99	28	13	203	92	3	2	55	10	45	5	167	129	19	114	160	35	20	5	324	26	222	158	30	19	31	1	5	83	546	93	322	119	142	11	169	19
OTU_1684	k__Bacteria	p__Firmicutes	c__Erysipelotrichia	o__Erysipelotrichales	f__Erysipelotrichaceae	g__Ileibacterium	s__Ileibacterium_valens	248	539	319	419	129	316	0	122	478	557	22	1	4	520	47	0	94	1280	143	956	338	258	3	740	0	106	167	3	1	2	307	21	0	412	0	0	337	433	666	0
OTU_1685	k__Bacteria	p__Firmicutes	c__Erysipelotrichia	o__Erysipelotrichales	f__Erysipelotrichaceae	g__Dubosiella	s__	0	0	0	0	2	0	1	0	2	1	1	0	0	0	0	0	0	0	0	0	0	0	2	74	0	5	0	0	0	0	4	0	4	0	0	7	0	0	0	2
OTU_1686	k__Bacteria	p__Firmicutes	c__Clostridia	o__Clostridiales	f__Lachnospiraceae	g__Blautia	s__Lachnospiraceae_bacterium_609	0	0	0	0	0	0	0	0	0	0	0	0	0	0	1	0	0	0	0	0	0	0	0	0	0	0	0	0	3	6	0	0	1	0	0	4	51	0	0	0
OTU_1687	k__Bacteria	p__Firmicutes	c__Clostridia	o__Clostridiales	f__Lachnospiraceae	Others	Others	0	0	0	0	0	0	0	2	0	0	127	6	0	2	0	62	0	0	0	0	0	0	1	0	55	4	0	0	0	6	0	5	3	0	0	0	0	0	0	5
OTU_1689	k__Bacteria	p__Verrucomicrobia	c__Verrucomicrobiae	o__unidentified_Verrucomicrobiae	f__unidentified_Verrucomicrobiae	g__unidentified_Verrucomicrobiae	s__bacterium_enrichment_culture_clone_R4-41B	0	0	0	0	0	4	0	0	0	0	0	0	0	0	0	0	0	0	0	0	0	0	0	0	0	0	0	0	0	0	0	0	0	0	0	0	0	0	0	0
OTU_1690	k__Bacteria	p__Firmicutes	c__Bacilli	o__Lactobacillales	f__Lactobacillaceae	g__Lactobacillus	Others	0	0	0	0	0	0	0	0	0	0	0	2	0	0	0	3	0	0	0	0	0	0	0	0	3	3	8	0	6	24	0	6	0	0	0	0	0	1	0	2
OTU_1691	k__Bacteria	p__Actinobacteria	c__Thermoleophilia	o__Gaiellales	f__	g__	s__	0	0	0	0	0	4	0	0	0	0	0	0	0	0	0	0	0	0	0	0	0	0	0	0	0	0	0	0	0	0	0	0	0	0	0	0	0	0	0	0
OTU_1692	k__Bacteria	p__Firmicutes	c__Bacilli	o__Bacillales	f__Paenibacillaceae	g__Paenibacillus	Others	0	0	0	0	0	0	0	0	0	0	0	0	0	0	0	0	0	0	0	0	0	0	0	0	0	0	0	0	0	0	0	0	0	0	0	0	0	0	6	0
OTU_1693	k__Bacteria	p__Gemmatimonadetes	c__unidentified_Gemmatimonadetes	o__Gemmatimonadales	f__Gemmatimonadaceae	g__	s__	0	5	0	0	0	0	0	0	0	0	0	0	0	0	0	0	0	0	0	0	0	0	0	0	0	0	0	1	0	0	0	0	0	0	0	0	0	0	0	0
OTU_1694	k__Bacteria	p__Firmicutes	c__Erysipelotrichia	o__Erysipelotrichales	f__Erysipelotrichaceae	g__Erysipelothrix	s__	0	0	0	0	0	0	0	0	0	0	0	0	0	0	0	0	0	0	0	0	0	0	0	0	0	0	0	0	0	0	0	0	5	0	0	0	0	0	0	0
OTU_1695	k__Bacteria	p__Planctomycetes	c__Planctomycetacia	o__	f__	g__	s__	0	0	0	0	0	5	0	0	0	0	0	0	0	0	0	0	0	0	0	0	0	0	0	0	0	0	0	0	0	0	0	0	0	0	0	0	0	0	0	0
OTU_1696	k__Bacteria	p__Proteobacteria	c__Alphaproteobacteria	o__Rhodobacterales	f__Rhodobacteraceae	Others	Others	0	0	1	0	0	0	0	0	0	0	0	0	0	0	0	0	0	0	0	0	0	0	3	0	0	0	0	0	0	0	0	0	1	0	0	0	0	0	0	0
OTU_1697	k__Bacteria	p__Actinobacteria	c__	o__	f__	g__	s__	0	2	0	0	0	0	0	0	0	0	1	0	0	0	0	0	0	0	0	0	0	0	0	0	0	0	0	0	0	0	0	0	0	0	0	0	0	0	0	0
OTU_1699	k__Bacteria	p__Actinobacteria	c__Thermoleophilia	o__Gaiellales	f__	g__	s__	0	4	0	0	0	0	0	0	0	0	0	0	0	0	0	0	0	0	0	0	0	0	0	0	0	0	0	0	0	0	0	0	0	0	0	0	0	0	0	0
OTU_1700	k__Bacteria	p__Bacteroidetes	c__Bacteroidia	o__Bacteroidales	f__Rikenellaceae	g__unidentified_Rikenellaceae	s__Rikenellaceae_bacterium_DTU002	0	0	0	0	0	3	0	0	0	0	0	1	0	0	0	0	0	0	0	0	0	0	0	0	0	0	0	0	0	0	0	0	0	0	0	0	0	0	0	0
OTU_1701	k__Bacteria	p__Gemmatimonadetes	c__unidentified_Gemmatimonadetes	o__Gemmatimonadales	f__Gemmatimonadaceae	Others	Others	0	1	0	0	0	0	0	0	0	0	0	0	0	0	0	0	0	0	0	0	0	0	0	0	0	0	0	0	0	0	0	0	0	0	0	0	0	0	0	0
OTU_1702	k__Bacteria	p__Firmicutes	c__Clostridia	o__Clostridiales	f__Lachnospiraceae	Others	Others	0	0	0	0	37	41	0	17	0	7	5	4	3	0	20	0	0	1	16	0	2	0	0	0	19	0	0	0	0	0	73	33	0	58	0	0	4	141	2	0
OTU_1703	k__Bacteria	p__Firmicutes	c__Erysipelotrichia	o__Erysipelotrichales	f__Erysipelotrichaceae	g__Holdemanella	s__	0	0	0	0	2	0	0	5	0	0	0	0	3	0	0	0	0	0	0	2	0	0	8	3	0	1	0	0	0	0	0	0	0	0	0	0	0	0	1	0
OTU_1704	k__Bacteria	p__Firmicutes	c__Negativicutes	o__Selenomonadales	f__Veillonellaceae	g__Veillonella	Others	0	0	0	0	0	0	0	0	0	0	0	0	0	0	0	0	0	0	0	0	0	0	0	0	0	0	5	0	0	0	0	0	0	0	0	0	0	0	5	1
OTU_1705	k__Bacteria	p__Firmicutes	c__Clostridia	o__Clostridiales	f__Ruminococcaceae	Others	Others	0	0	4	0	0	1	0	0	0	0	0	0	3	2	1	5	0	1	0	0	2	0	0	4	0	0	0	0	5	0	0	0	0	0	1	1	0	0	0	0
OTU_1707	k__Bacteria	p__Bacteroidetes	c__Bacteroidia	o__Bacteroidales	f__	g__	s__	0	0	0	0	0	3	0	0	0	0	0	0	0	0	0	0	0	0	0	0	0	0	0	0	0	0	0	0	0	0	0	0	0	0	0	0	0	0	0	0
OTU_1708	k__Bacteria	p__Nitrospirae	c__	o__	f__	g__	s__	0	0	0	0	0	1	0	0	0	0	0	0	0	0	0	0	0	0	0	0	0	0	0	0	0	0	0	0	0	0	0	0	0	0	0	0	0	0	0	0
OTU_1709	k__Bacteria	p__Planctomycetes	c__Planctomycetacia	o__	f__	g__	s__	0	1	0	0	0	0	0	0	0	0	0	0	0	0	0	0	0	0	0	0	0	0	0	0	0	0	0	0	0	0	0	0	0	0	0	0	0	0	0	0
OTU_1710	k__Bacteria	p__Firmicutes	c__Clostridia	o__Clostridiales	f__Ruminococcaceae	g__unidentified_Ruminococcaceae	Others	0	0	0	0	0	0	0	0	0	0	0	0	0	0	31	0	0	0	0	0	0	0	0	0	0	0	0	0	0	0	0	0	0	0	0	0	1	0	0	0
OTU_1712	k__Bacteria	p__Firmicutes	c__Clostridia	o__Clostridiales	f__Lachnospiraceae	g__Lachnoclostridium	Others	1	2	1	1	1	0	0	2	1	3	16	12	13	11	2	9	0	0	3	2	0	5	0	9	1	4	19	122	39	59	28	7	0	0	9	54	0	22	1	127
OTU_1713	k__Bacteria	p__Acidobacteria	c__Acidobacteriia	o__Solibacterales	f__unidentified_Solibacterales	g__Bryobacter	s__	0	0	0	0	0	0	0	0	0	0	0	0	0	0	0	0	0	0	0	0	0	0	0	0	0	0	0	0	0	0	0	0	4	0	0	0	0	0	0	0
OTU_1714	k__Bacteria	p__Proteobacteria	c__Deltaproteobacteria	o__Syntrophobacterales	f__Syntrophobacteraceae	g__	s__	0	0	0	0	0	0	0	0	0	0	0	0	0	0	0	0	0	0	0	0	0	0	0	0	0	0	0	2	0	0	0	0	0	0	0	0	0	0	0	0
OTU_1716	k__Bacteria	p__Bacteroidetes	c__Bacteroidia	o__Bacteroidales	f__Marinifilaceae	g__Odoribacter	s__	0	0	0	0	0	0	0	0	0	0	0	0	0	0	0	0	0	0	0	0	0	0	0	0	0	0	0	0	3	3	0	0	0	0	0	0	0	0	0	0
OTU_1717	k__Bacteria	p__Firmicutes	c__Erysipelotrichia	o__Erysipelotrichales	f__Erysipelotrichaceae	g__Dubosiella	s__	0	1	0	0	10	12	1	4	69	19	18	8	0	5	3	0	0	0	13	9	4	0	3	10	0	39	59	0	0	6	47	3	3	10	0	207	13	2	14	19
OTU_1718	k__Bacteria	p__Firmicutes	c__Clostridia	o__Clostridiales	f__Lachnospiraceae	g__Lachnoclostridium	Others	15	51	3	12	1	0	2	1	4	17	28	4	31	10	1	6	0	0	9	2	0	0	0	47	0	7	4	74	88	8	7	45	76	2	21	1	0	1	0	0
OTU_1719	k__Bacteria	p__Firmicutes	c__Clostridia	o__Clostridiales	f__unidentified_Clostridiales	g__Fusibacter	Others	0	0	0	0	0	0	0	0	0	0	0	0	0	0	0	0	0	0	0	0	0	0	0	0	0	0	0	0	0	0	0	0	8	0	0	0	0	0	0	0
OTU_1722	k__Bacteria	p__Proteobacteria	c__Deltaproteobacteria	o__Desulfovibrionales	f__Desulfovibrionaceae	g__Desulfovibrio	s__Desulfovibrio_sp_ABHU2SB	6	2	0	0	0	0	0	0	0	2	31	2	351	4	0	9	0	1	47	1	0	0	0	3	6	32	0	0	0	0	3	6	0	0	0	5	0	5	11	0
OTU_1723	k__Bacteria	Others	Others	Others	Others	Others	Others	0	0	0	0	0	6	0	0	0	0	0	0	0	0	0	0	0	0	0	0	0	0	0	0	0	0	0	0	0	0	0	0	0	0	0	0	0	0	0	0
OTU_1724	k__Bacteria	p__Bacteroidetes	c__Bacteroidia	o__Bacteroidales	f__Paludibacteraceae	g__Paludibacter	s__	0	0	0	0	0	0	0	0	0	0	0	0	0	0	0	0	0	0	0	0	0	3	0	0	0	0	0	0	0	0	0	0	0	0	0	0	0	0	0	0
OTU_1725	k__Bacteria	p__Actinobacteria	c__Coriobacteriia	o__Coriobacteriales	f__Eggerthellaceae	Others	Others	4	3	7	14	13	4	6	10	3	4	22	23	17	15	7	13	21	5	0	3	26	58	21	19	5	18	5	66	19	14	4	23	8	14	6	0	6	15	2	22
OTU_1726	k__Bacteria	p__Proteobacteria	c__Alphaproteobacteria	o__Sphingomonadales	f__Sphingomonadaceae	g__Sphingomonas	Others	0	6	7	0	0	0	0	0	0	0	0	0	0	0	0	0	0	0	0	0	0	0	0	0	0	0	0	0	0	0	0	0	4	0	0	0	0	0	0	0
OTU_1727	k__Bacteria	p__Bacteroidetes	c__Bacteroidia	o__Bacteroidales	f__Bacteroidaceae	g__Bacteroides	Others	3	0	0	0	0	0	0	0	0	0	0	0	0	0	0	0	0	0	0	0	0	0	1	0	4	1	0	1	1	0	0	0	0	0	0	0	0	0	0	0
OTU_1728	k__Bacteria	p__Firmicutes	c__Clostridia	o__Clostridiales	f__Lachnospiraceae	g__unidentified_Lachnospiraceae	s__Clostridium_sp_Culture-41	0	6	0	1	0	0	1	0	0	7	2	0	21	3	0	0	3	0	4	0	0	0	1	1	0	2	3	13	9	2	4	7	7	2	4	1	1	0	1	0
OTU_1730	k__Bacteria	p__Firmicutes	c__Clostridia	o__Clostridiales	f__Lachnospiraceae	Others	Others	0	5	1	3	6	2	12	3	2	5	2	5	28	13	9	7	11	1	0	1	5	10	0	8	3	2	2	30	2	1	2	13	0	2	14	0	2	3	1	30
OTU_1731	k__Bacteria	p__Firmicutes	c__Clostridia	o__Clostridiales	f__Lachnospiraceae	Others	Others	6	93	0	6	24	14	6	43	3	41	157	23	158	160	6	40	12	0	39	1	3	3	41	41	14	51	0	14	3	1	32	73	1	4	4	0	2	45	5	0
OTU_1732	k__Bacteria	p__Proteobacteria	c__Gammaproteobacteria	o__Xanthomonadales	f__Xanthomonadaceae	g__Stenotrophomonas	s__Stenotrophomonas_acidaminiphila	0	0	0	0	0	2	0	0	0	0	0	0	0	0	0	0	0	0	0	0	0	0	0	0	0	0	0	0	0	0	0	0	0	0	0	0	0	0	0	0
OTU_1734	k__Bacteria	p__Bacteroidetes	c__Bacteroidia	o__Bacteroidales	f__Porphyromonadaceae	g__Porphyromonas	s__	0	0	0	0	0	0	0	0	0	0	0	0	0	0	0	0	0	0	0	0	0	0	0	1	0	0	0	0	0	0	0	0	0	0	0	0	0	0	0	0
OTU_1735	k__Bacteria	p__Bacteroidetes	c__Bacteroidia	o__Bacteroidales	f__Marinilabiliaceae	g__Ruminofilibacter	s__	0	0	0	0	0	0	0	0	0	0	0	0	0	0	0	0	0	0	0	0	0	0	0	0	0	0	0	0	0	0	0	2	0	0	0	0	0	0	0	0
OTU_1736	k__Bacteria	p__Proteobacteria	c__Alphaproteobacteria	o__Caulobacterales	f__Caulobacteraceae	g__Caulobacter	s__Caulobacter_sp	0	0	0	0	0	0	0	0	0	0	0	0	0	0	0	0	0	0	0	0	0	0	0	0	0	0	1	0	0	0	0	0	0	0	0	0	0	0	0	0
OTU_1737	k__Bacteria	p__Proteobacteria	c__Deltaproteobacteria	o__Syntrophobacterales	f__Syntrophaceae	g__Syntrophus	s__	0	0	0	0	0	4	0	0	0	0	0	0	0	0	0	0	0	0	0	0	0	0	0	0	0	0	0	0	0	0	0	0	0	0	0	0	0	0	0	0
OTU_1738	k__Bacteria	p__Firmicutes	c__Clostridia	o__Clostridiales	f__Peptococcaceae	g__	s__	0	0	0	0	0	5	0	0	0	0	0	0	0	0	0	0	0	0	0	0	0	0	0	0	0	0	0	0	0	0	0	0	0	0	0	0	0	0	0	0
OTU_1739	k__Bacteria	p__Firmicutes	c__Clostridia	o__Clostridiales	f__Lachnospiraceae	Others	Others	1	21	0	0	0	0	13	34	0	0	0	0	0	0	0	0	0	0	0	0	0	5	0	0	0	0	0	0	15	0	0	0	0	0	0	0	0	0	0	0
OTU_1740	k__Bacteria	Others	Others	Others	Others	Others	Others	0	0	0	0	0	0	0	0	0	0	0	0	0	0	0	0	0	0	0	0	0	3	1	0	0	0	0	0	0	0	0	0	0	0	0	0	1	0	0	0
OTU_1741	k__Bacteria	p__Proteobacteria	c__Gammaproteobacteria	o__Pasteurellales	f__Pasteurellaceae	Others	Others	0	0	4	0	0	0	0	0	0	0	0	0	0	4	0	0	0	0	2	0	0	0	0	0	2	0	33	0	0	0	0	0	0	0	0	0	0	0	0	0
OTU_1742	k__Bacteria	p__Firmicutes	c__Clostridia	o__Clostridiales	f__Ruminococcaceae	Others	Others	0	0	0	0	0	0	0	1	0	0	0	0	0	0	0	0	0	0	0	0	0	0	0	0	0	0	0	1	3	0	0	0	0	0	0	0	0	0	0	0
OTU_1743	k__Bacteria	p__Actinobacteria	c__Coriobacteriia	o__Coriobacteriales	f__Coriobacteriaceae	g__Collinsella	s__Collinsella_tanakaei	0	0	0	0	0	0	0	0	0	0	0	0	0	0	0	0	0	0	0	1	0	0	0	0	0	0	0	0	0	0	0	0	0	0	0	0	0	0	0	0
OTU_1744	k__Bacteria	p__Firmicutes	c__Clostridia	o__Clostridiales	f__Lachnospiraceae	Others	Others	0	0	0	0	0	0	0	0	0	0	8	0	4	0	114	11	2	15	0	0	0	0	3	2	9	0	0	1	2	1	0	4	5	2	0	0	0	0	3	0
OTU_1745	k__Bacteria	p__Gemmatimonadetes	c__unidentified_Gemmatimonadetes	o__Gemmatimonadales	f__Gemmatimonadaceae	Others	Others	0	7	0	0	0	0	0	0	0	0	0	0	0	0	0	0	0	0	0	0	0	0	0	0	0	0	0	0	0	0	0	0	0	0	0	0	0	0	0	0
OTU_1746	k__Bacteria	p__Firmicutes	c__Bacilli	o__Bacillales	f__Bacillaceae	g__Fictibacillus	Others	0	2	0	0	0	0	0	0	0	0	0	0	0	0	0	0	0	0	0	0	0	0	0	0	0	0	0	0	0	0	0	0	0	0	0	0	0	0	0	0
OTU_1748	k__Bacteria	p__Firmicutes	c__Clostridia	o__Clostridiales	f__Lachnospiraceae	Others	Others	0	0	0	0	0	0	0	0	0	0	0	0	0	0	0	0	0	0	0	0	0	0	1	0	0	0	0	0	54	0	0	0	0	0	0	0	0	0	0	0
OTU_1749	k__Bacteria	p__Proteobacteria	c__Deltaproteobacteria	o__Syntrophobacterales	f__Syntrophobacteraceae	g__Syntrophobacter	s__	0	0	0	0	0	11	0	0	0	0	0	0	0	0	0	0	0	0	0	0	0	0	0	0	0	0	0	0	0	0	0	0	0	0	0	0	0	0	0	0
OTU_1750	k__Bacteria	p__Calditrichaeota	c__unidentified_Calditrichaeota	o__Calditrichales	f__Calditrichaceae	g__	s__	0	0	0	0	0	3	0	0	0	0	0	0	0	0	0	0	0	0	0	0	0	0	0	0	0	0	0	0	0	0	0	0	0	0	0	0	0	0	0	0
OTU_1751	k__Bacteria	p__Firmicutes	c__Clostridia	o__Clostridiales	f__Lachnospiraceae	Others	Others	3	1	0	0	0	0	0	0	0	1	0	0	2	0	0	1	1	3	0	0	0	2	1	0	3	0	0	2	1	0	3	2	5	1	2	14	6	1	8	0
OTU_1752	k__Bacteria	p__Tenericutes	c__Mollicutes	o__	f__	g__	s__	0	0	0	0	0	0	2	0	0	0	2	0	0	1	0	4	0	0	138	0	0	0	0	0	0	1	1	0	2	0	1	0	0	0	0	0	6	15	1	0
OTU_1753	k__Bacteria	p__Firmicutes	c__Erysipelotrichia	o__Erysipelotrichales	f__Erysipelotrichaceae	g__Dubosiella	Others	17	8	0	1	102	58	5	48	0	53	34	1	0	6	0	37	4	2	74	1	0	0	4	25	0	5	0	0	0	0	2	1	0	35	0	0	3	15	2	2
OTU_1754	k__Bacteria	p__Spirochaetes	c__Spirochaetia	o__Spirochaetales	f__Spirochaetaceae	Others	Others	0	0	0	0	0	1	0	0	0	0	0	0	0	0	0	0	0	0	0	0	0	0	0	0	0	0	0	0	0	0	0	0	0	0	0	0	0	0	0	0
OTU_1755	k__Bacteria	p__unidentified_Bacteria	c__unidentified_Bacteria	o__unidentified_Bacteria	f__unidentified_Bacteria	g__unidentified_Bacteria	Others	0	4	0	0	0	0	0	0	0	0	0	0	0	0	0	0	0	0	0	0	0	0	0	0	0	0	0	0	0	0	0	0	0	0	0	0	0	0	0	0
OTU_1756	k__Bacteria	p__Firmicutes	c__Bacilli	o__Bacillales	f__Thermoactinomycetaceae	g__Planifilum	s__	0	3	0	0	0	0	0	0	0	0	0	0	0	0	0	0	0	0	0	0	0	0	0	0	0	0	0	0	0	0	0	0	0	0	0	0	0	0	0	0
OTU_1757	k__Bacteria	p__Firmicutes	c__Bacilli	o__Bacillales	f__Bacillaceae	g__Bacillus	Others	0	11	0	0	0	0	0	0	0	0	0	0	0	0	0	0	0	0	0	0	0	0	0	0	0	0	0	2	0	0	1	2	0	0	0	0	0	0	0	0
OTU_1761	k__Bacteria	p__Bacteroidetes	c__Bacteroidia	o__Bacteroidales	f__Prolixibacteraceae	g__unidentified_Prolixibacteraceae	s__bacterium_PB90-2	0	0	0	0	0	0	0	1	0	0	0	0	0	0	0	0	0	0	0	0	0	0	0	0	0	0	0	0	0	0	0	0	0	0	0	0	0	0	0	0
OTU_1768	k__Bacteria	p__Chloroflexi	c__Anaerolineae	o__Anaerolineales	f__Anaerolineaceae	g__Anaerolinea	s__	0	0	0	0	0	9	0	0	0	0	0	0	0	0	0	0	0	0	0	0	0	0	0	0	0	0	0	0	0	0	0	0	0	0	0	0	0	0	0	0
OTU_1769	k__Bacteria	p__Firmicutes	c__Clostridia	o__Clostridiales	f__Ruminococcaceae	Others	Others	22	6	7	0	5	4	6	3	4	1	8	5	26	3	4	8	0	11	12	7	2	2	3	15	15	4	2	5	5	3	16	8	5	34	54	34	10	4	19	0
OTU_1770	k__Bacteria	p__Bacteroidetes	c__Bacteroidia	o__Bacteroidales	f__Prevotellaceae	g__unidentified_Prevotellaceae	s__Prevotella_baroniae	0	2	0	0	0	0	0	0	0	0	0	0	0	0	0	0	0	0	0	0	0	0	0	0	0	0	0	0	0	0	0	0	0	0	0	0	0	0	0	0
OTU_1771	k__Bacteria	p__Bacteroidetes	c__Ignavibacteria	o__Ignavibacteriales	f__Ignavibacteriaceae	g__Ignavibacterium	Others	0	0	0	0	0	0	0	0	0	0	0	0	0	0	0	0	0	0	0	0	0	0	0	0	0	0	0	0	0	0	0	0	3	0	0	0	0	0	0	0
OTU_1772	k__Bacteria	p__Firmicutes	c__Clostridia	o__Clostridiales	f__Lachnospiraceae	Others	Others	0	0	0	0	0	0	0	0	0	0	0	0	0	0	0	0	8	0	0	0	0	0	0	0	0	0	0	0	0	0	0	0	0	0	0	0	0	0	0	0
OTU_1774	k__Bacteria	p__Spirochaetes	c__unidentified_Spirochaetes	o__unidentified_Spirochaetes	f__unidentified_Spirochaetes	g__unidentified_Spirochaetes	s__bacterium_enrichment_culture_clone_BBMC-13	0	0	0	0	0	4	0	0	0	0	0	0	0	0	0	0	0	0	0	0	0	0	0	0	0	0	0	0	0	0	0	0	0	0	0	0	0	0	0	0
OTU_1775	k__Bacteria	p__Firmicutes	c__Clostridia	o__Clostridiales	f__Ruminococcaceae	Others	Others	0	0	0	0	0	0	0	1	0	0	0	0	0	0	0	0	0	0	0	0	0	0	0	0	0	0	0	0	0	0	0	0	0	0	0	0	0	0	0	0
OTU_1776	k__Bacteria	p__Bacteroidetes	c__Bacteroidia	o__Bacteroidales	f__Bacteroidaceae	g__Bacteroides	s__Bacteroides_acidifaciens	0	0	0	0	0	0	7	0	0	0	0	0	0	0	0	0	0	0	2	0	3	0	0	0	0	0	0	0	0	0	0	0	0	0	0	0	0	0	0	0
OTU_1779	k__Bacteria	p__Proteobacteria	c__Alphaproteobacteria	Others	Others	Others	Others	0	0	0	0	0	0	0	0	0	0	0	0	0	0	0	0	0	0	0	0	0	0	0	2	0	0	0	0	0	0	0	0	0	0	0	3	0	0	0	0
OTU_1780	k__Bacteria	p__Actinobacteria	c__Coriobacteriia	o__Coriobacteriales	f__Eggerthellaceae	g__Senegalimassilia	s__	0	0	0	0	0	0	0	1	0	0	0	0	0	0	0	0	0	0	0	0	0	0	1	0	0	0	0	0	0	0	0	0	0	0	0	0	0	0	0	0
OTU_1781	k__Bacteria	p__Firmicutes	c__Clostridia	o__Clostridiales	f__Ruminococcaceae	g__Oscillibacter	s__	0	0	0	0	0	0	0	0	0	0	0	0	0	0	0	0	0	0	0	0	0	0	0	0	0	0	0	0	4	0	0	0	0	0	0	0	0	0	0	0
OTU_1782	k__Bacteria	p__Firmicutes	c__Clostridia	o__Clostridiales	f__Ruminococcaceae	Others	Others	0	0	0	0	0	0	0	0	0	0	0	0	0	0	0	0	0	0	0	0	0	0	0	0	0	0	0	0	10	0	0	0	0	0	0	0	0	0	0	0
OTU_1783	k__Bacteria	p__Proteobacteria	c__Gammaproteobacteria	o__unidentified_Gammaproteobacteria	f__unidentified_Gammaproteobacteria	g__unidentified_Gammaproteobacteria	s__Steroidobacter_sp_WWH78	0	0	0	0	0	0	0	0	0	2	0	0	0	0	0	0	0	0	0	0	0	0	0	0	0	0	0	0	0	0	0	0	1	0	0	0	0	0	0	0
OTU_1786	k__Bacteria	p__Firmicutes	c__Clostridia	o__Clostridiales	Others	Others	Others	0	0	0	0	0	0	0	0	0	0	0	0	0	0	0	0	0	0	0	0	0	0	2	0	0	0	0	0	2	0	0	0	0	0	0	0	0	0	0	0
OTU_1787	k__Bacteria	p__Proteobacteria	Others	Others	Others	Others	Others	0	8	0	0	0	0	0	0	0	0	0	0	0	0	0	0	0	0	0	0	0	0	0	0	0	0	0	0	0	0	0	0	0	0	0	0	0	0	0	0
OTU_1788	k__Bacteria	p__Actinobacteria	c__Thermoleophilia	o__Gaiellales	f__Gaiellaceae	g__Gaiella	s__	0	0	0	0	0	0	0	0	0	0	0	0	0	0	0	0	0	0	0	0	0	0	3	0	0	0	0	0	0	0	0	0	0	0	0	0	0	0	0	0
OTU_1790	k__Bacteria	p__Firmicutes	c__Clostridia	o__Clostridiales	f__Lachnospiraceae	Others	Others	0	0	0	0	0	0	0	0	0	0	0	0	0	2	0	0	0	0	0	0	0	0	0	0	0	0	0	0	0	0	0	0	0	0	0	0	0	0	0	0
OTU_1791	k__Bacteria	p__Actinobacteria	c__Thermoleophilia	o__Solirubrobacterales	f__	g__	s__	0	4	0	0	0	0	0	0	0	0	0	0	0	0	0	1	0	0	0	0	0	0	0	0	0	0	0	0	0	0	0	0	0	0	0	0	0	0	0	0
OTU_1792	k__Bacteria	p__Firmicutes	c__Clostridia	o__Clostridiales	Others	Others	Others	0	0	2	0	0	1	1	3	0	0	2	0	7	0	0	0	17	1	0	0	0	4	0	0	1	0	0	0	5	0	0	0	0	2	0	0	0	2	0	0
OTU_1793	k__Bacteria	p__Firmicutes	c__Clostridia	o__Clostridiales	f__Ruminococcaceae	Others	Others	5	3	0	0	0	2	0	0	0	0	0	0	1	0	0	9	1	0	1	2	0	0	0	0	0	0	0	3	0	0	0	0	0	2	3	7	0	0	0	0
OTU_1794	k__Bacteria	p__Proteobacteria	c__Alphaproteobacteria	o__Caulobacterales	f__Caulobacteraceae	Others	Others	0	0	0	0	0	0	0	0	0	0	0	0	0	0	0	0	0	0	0	0	0	0	0	0	0	0	0	0	1	0	0	0	0	0	0	0	0	0	0	0
OTU_1795	k__Bacteria	p__Firmicutes	c__Clostridia	o__Clostridiales	f__Lachnospiraceae	g__unidentified_Lachnospiraceae	Others	5	2	0	1	6	0	3	2	0	2	2	62	1	0	6	2	0	0	2	1	0	5	2	0	1	4	2	16	251	37	0	6	3	3	0	99	24	0	2	55
OTU_1796	k__Bacteria	p__Firmicutes	c__Clostridia	o__Clostridiales	f__Ruminococcaceae	g__Caproiciproducens	Others	0	0	0	0	0	0	0	0	0	0	0	0	0	0	6	0	0	0	0	1	0	0	2	0	0	0	0	1	0	0	0	0	0	0	0	0	5	0	5	0
OTU_1797	k__Bacteria	p__Firmicutes	c__Clostridia	o__Clostridiales	f__Ruminococcaceae	g__unidentified_Ruminococcaceae	s__Clostridiales_bacterium_CIEAF_013	6	27	2	1	3	1	5	6	1	0	0	3	114	5	10	22	4	4	43	9	4	3	2	6	3	2	5	3	15	7	11	7	9	18	16	73	59	7	15	5
OTU_1798	k__Bacteria	p__Firmicutes	c__Erysipelotrichia	o__Erysipelotrichales	f__Erysipelotrichaceae	g__Dubosiella	s__	210	38	108	49	778	462	162	476	9	250	159	25	1	63	2	460	132	42	373	23	45	89	48	76	3	19	0	26	15	0	8	11	1	329	0	8	21	137	23	28
OTU_1800	k__Bacteria	p__Firmicutes	c__Bacilli	o__Bacillales	f__Paenibacillaceae	g__Paenibacillus	Others	0	0	0	0	0	0	0	0	0	0	0	0	0	0	0	0	0	0	0	0	0	0	0	0	0	0	0	0	0	0	0	0	0	0	0	0	0	0	5	0
OTU_1801	k__Bacteria	p__Firmicutes	c__Erysipelotrichia	o__Erysipelotrichales	f__Erysipelotrichaceae	g__Ileibacterium	s__Ileibacterium_valens	0	0	0	0	0	0	0	0	0	6	0	0	0	0	0	0	0	0	0	3	0	0	0	1	0	2	0	0	0	0	0	0	0	0	0	0	0	2	4	0
OTU_1802	k__Bacteria	p__Firmicutes	c__Clostridia	o__Clostridiales	f__Ruminococcaceae	Others	Others	0	0	0	0	0	0	0	0	0	0	0	0	0	0	0	0	0	0	0	0	0	1	0	0	0	0	0	0	0	0	0	0	0	0	0	0	0	0	0	3
OTU_1803	k__Bacteria	p__Firmicutes	c__Clostridia	o__Clostridiales	Others	Others	Others	0	0	0	0	0	0	0	3	0	0	0	0	0	0	0	0	0	0	0	0	0	0	0	0	1	0	0	0	0	0	0	0	0	0	0	0	0	0	0	0
OTU_1805	k__Bacteria	p__Firmicutes	c__Clostridia	o__Clostridiales	f__Lachnospiraceae	Others	Others	8	5	2	7	2	0	6	3	5	0	11	11	53	40	2	4	4	1	0	0	0	7	4	50	12	15	2	16	0	0	2	6	4	3	22	9	0	6	0	0
OTU_1806	k__Bacteria	p__Proteobacteria	c__Gammaproteobacteria	o__unidentified_Gammaproteobacteria	f__Woeseiaceae	g__	s__	0	0	0	0	0	0	0	0	0	0	0	0	0	0	0	0	0	0	0	0	0	0	0	0	0	0	0	0	0	0	0	0	3	0	0	0	0	0	0	0
OTU_1807	k__Bacteria	p__Bacteroidetes	c__Bacteroidia	o__Bacteroidales	f__Marinifilaceae	g__Butyricimonas	Others	0	0	0	0	0	0	0	0	0	0	0	0	0	0	0	0	4	0	0	0	0	0	0	0	0	0	0	0	0	0	0	0	0	0	0	0	0	0	0	0
OTU_1811	k__Bacteria	p__Actinobacteria	c__Coriobacteriia	o__Coriobacteriales	f__Atopobiaceae	Others	Others	0	0	0	0	3	34	0	0	0	0	0	1	0	0	0	0	0	0	0	0	0	0	0	0	0	0	0	0	0	0	0	0	1	0	0	0	0	0	2	0
OTU_1812	k__Bacteria	p__Firmicutes	c__Clostridia	o__Clostridiales	f__Lachnospiraceae	Others	Others	0	0	0	0	0	0	0	0	0	2	0	0	0	1	0	0	0	0	0	0	0	1	0	0	2	3	0	0	0	0	0	31	3	0	0	0	0	21	0	0
OTU_1813	k__Bacteria	p__Firmicutes	c__Clostridia	o__Clostridiales	f__Ruminococcaceae	g__	s__	0	0	0	1	0	0	4	0	0	0	0	0	0	0	0	0	5	0	0	0	0	0	0	0	0	0	0	0	29	0	0	0	0	0	0	0	0	0	0	0
OTU_1817	k__Bacteria	p__Fusobacteria	c__Fusobacteriia	o__Fusobacteriales	f__Fusobacteriaceae	g__Cetobacterium	s__	0	0	0	0	0	0	0	2	0	0	0	0	0	0	0	0	0	1	0	0	0	0	0	0	0	0	0	0	0	0	0	0	0	0	0	0	0	0	0	0
OTU_1818	k__Bacteria	p__Bacteroidetes	c__Bacteroidia	o__Bacteroidales	f__	g__	s__	0	0	0	0	0	9	0	0	0	0	0	0	0	0	0	0	0	0	0	0	0	0	0	0	0	0	0	0	0	0	0	0	0	0	0	0	0	0	0	0
OTU_1819	k__Bacteria	p__Proteobacteria	c__Gammaproteobacteria	o__Alteromonadales	f__Alteromonadaceae	g__Alishewanella	s__	0	0	0	0	0	0	0	0	0	0	0	0	0	0	0	0	0	0	0	0	0	0	0	0	0	0	0	0	0	0	0	0	0	0	0	0	0	0	0	0
OTU_1820	k__Bacteria	p__Tenericutes	c__Mollicutes	o__	f__	g__	s__	0	0	0	0	3	2	2	5	0	0	0	6	0	3	0	16	1	0	23	0	0	1	9	3	3	5	0	12	9	0	0	1	0	0	0	0	1	0	0	48
OTU_1821	k__Bacteria	p__Bacteroidetes	c__Bacteroidia	o__Bacteroidales	f__Prevotellaceae	g__	s__	0	21	0	0	0	0	0	4	0	0	0	0	0	0	0	0	0	0	0	0	0	0	0	0	0	0	0	0	51	0	0	0	0	0	0	0	0	0	0	0
OTU_1823	k__Archaea	p__Euryarchaeota	c__Methanomicrobia	o__Methanosarcinales	f__Methanosaetaceae	g__Methanosaeta	Others	0	0	0	0	0	77	0	1	0	0	0	1	0	0	0	0	0	0	0	0	0	0	0	0	0	0	0	0	0	0	0	0	0	0	0	0	0	0	0	0
OTU_1824	k__Bacteria	p__Firmicutes	c__Erysipelotrichia	o__Erysipelotrichales	f__Erysipelotrichaceae	g__Dubosiella	s__	0	0	3	4	40	73	12	41	419	157	73	59	3	42	25	0	15	7	58	112	21	21	19	39	0	289	10	1	0	0	396	40	29	111	24	13	6	15	42	3
OTU_1825	k__Bacteria	p__Firmicutes	c__Clostridia	o__Clostridiales	f__Lachnospiraceae	g__Dorea	s__Dorea_longicatena	2	7	0	0	0	0	0	17	0	0	15	3	3	5	0	0	0	0	0	0	0	0	7	0	0	4	0	3	12	0	0	0	4	0	0	0	0	0	0	0
OTU_1826	k__Bacteria	p__Proteobacteria	c__Alphaproteobacteria	o__Rhizobiales	f__unidentified_Rhizobiales	g__Devosia	Others	0	0	0	0	0	0	0	0	0	0	0	0	0	0	0	0	0	0	0	0	0	0	0	0	0	0	0	0	0	0	0	0	1	0	0	0	0	0	0	0
OTU_1827	k__Bacteria	p__Bacteroidetes	c__Bacteroidia	o__Bacteroidales	f__Muribaculaceae	g__	s__	0	1	0	0	0	0	0	0	0	0	0	0	0	0	0	0	0	0	3	0	0	0	0	0	1	0	0	0	0	0	0	0	0	0	0	12	0	0	0	0
OTU_1828	k__Bacteria	p__Bacteroidetes	c__Bacteroidia	o__Bacteroidales	f__Prevotellaceae	g__unidentified_Prevotellaceae	s__Prevotella_sp_oral_clone_P4PB_83_P2	0	0	0	0	0	0	0	0	0	0	0	0	4	0	0	0	0	0	0	0	0	0	0	0	0	0	0	0	0	0	0	0	0	0	0	0	0	0	0	0
OTU_1830	k__Bacteria	p__Firmicutes	c__Clostridia	o__Clostridiales	f__Ruminococcaceae	g__unidentified_Ruminococcaceae	s__Ruminiclostridium_sp_KB18	1	0	0	0	0	0	0	0	0	0	0	0	0	0	0	0	0	0	3	0	0	0	0	0	0	0	0	0	0	8	0	0	0	0	0	0	2	0	0	0
OTU_1831	k__Bacteria	p__Proteobacteria	c__Gammaproteobacteria	o__unidentified_Gammaproteobacteria	f__unidentified_Gammaproteobacteria	g__Iodobacter	s__	0	0	0	0	0	0	0	0	0	1	0	0	0	0	0	0	0	0	0	0	5	0	0	0	0	0	0	0	0	0	0	0	0	0	0	0	0	0	0	0
OTU_1832	k__Bacteria	p__Tenericutes	c__Mollicutes	o__	f__	g__	s__	0	0	0	0	0	0	0	0	0	0	0	0	0	0	0	0	0	0	0	0	0	0	6	0	0	0	0	0	0	0	0	0	0	0	0	0	0	0	0	0
OTU_1833	k__Bacteria	p__Firmicutes	c__Clostridia	o__Clostridiales	f__unidentified_Clostridiales	Others	Others	0	0	0	0	0	0	0	4	0	0	0	0	0	0	0	0	0	0	0	0	0	0	0	0	0	0	0	0	0	0	0	0	0	0	0	0	0	0	0	0
OTU_1837	k__Bacteria	p__Planctomycetes	c__Planctomycetacia	o__	f__	g__	s__	0	0	0	0	0	3	0	0	0	0	0	0	0	0	0	0	0	0	0	0	0	0	0	0	0	0	0	0	0	0	0	0	0	0	0	0	0	0	0	0
OTU_1838	k__Bacteria	p__Bacteroidetes	c__Bacteroidia	o__Flavobacteriales	f__Flavobacteriaceae	g__unidentified_Flavobacteriaceae	s__Flavobacteria_bacterium_MS024-3C	0	0	0	0	0	0	0	0	0	0	0	0	0	0	0	0	0	0	0	0	0	0	0	0	0	0	0	0	0	0	0	0	0	0	0	0	0	0	0	0
OTU_1841	k__Bacteria	p__Firmicutes	c__Clostridia	o__Clostridiales	f__Lachnospiraceae	Others	Others	0	0	0	0	0	0	0	0	2	0	0	0	0	0	2	0	0	0	0	0	0	0	0	0	0	0	0	1	0	0	0	0	0	3	3	0	2	0	0	0
OTU_1842	k__Bacteria	p__Firmicutes	c__Clostridia	o__Clostridiales	f__Ruminococcaceae	g__Faecalibacterium	Others	0	1	0	0	0	0	0	2	0	0	0	1	0	0	0	0	0	0	0	0	0	0	0	0	0	1	0	0	14	0	0	0	0	0	0	0	0	0	0	0
OTU_1845	k__Bacteria	p__Candidatus_Magasanikbacteria	Others	Others	Others	Others	Others	0	0	0	0	0	6	0	0	0	0	0	0	0	0	0	0	0	0	0	0	0	0	0	0	0	0	0	0	0	0	0	0	0	0	0	0	0	0	0	0
OTU_1846	k__Bacteria	p__Firmicutes	c__Clostridia	o__Clostridiales	f__Lachnospiraceae	g__Roseburia	s__Eubacterium_plexicaudatum	0	0	0	0	0	0	0	0	0	0	0	0	1	2	0	6	0	0	11	0	0	0	0	1	0	4	20	0	2	0	0	0	0	0	0	11	0	0	1	3
OTU_1847	k__Bacteria	p__unidentified_Bacteria	c__unidentified_Bacteria	o__Campylobacterales	f__unidentified_Campylobacterales	g__Sulfurimonas	s__	0	0	0	0	0	7	0	0	0	0	0	0	0	0	0	0	0	0	0	0	0	0	0	0	0	0	0	0	0	0	0	0	0	0	0	0	0	0	0	0
OTU_1848	k__Bacteria	p__Firmicutes	c__Bacilli	o__Lactobacillales	f__Carnobacteriaceae	g__Carnobacterium	s__Carnobacterium_maltaromaticum	0	5	0	2	0	0	0	0	0	0	0	0	0	4	0	0	1	0	0	0	0	0	0	0	0	0	0	0	0	0	0	0	6	0	0	0	0	0	0	0
OTU_1850	k__Bacteria	p__Firmicutes	c__Erysipelotrichia	o__Erysipelotrichales	f__Erysipelotrichaceae	g__Dubosiella	s__	0	0	0	0	0	3	4	0	9	12	7	4	0	0	0	0	0	0	0	4	0	0	0	0	0	7	2	0	0	0	16	1	0	11	0	10	0	0	0	0
OTU_1852	k__Bacteria	p__Firmicutes	c__Clostridia	o__Clostridiales	f__Lachnospiraceae	g__unidentified_Lachnospiraceae	s__Clostridiales_bacterium_CIEAF_020	4	3	0	1	0	0	0	0	1	0	2	2	0	0	0	0	0	0	0	0	0	0	0	1	1	0	0	0	0	0	2	4	0	0	3	0	1	0	1	1
OTU_1853	k__Bacteria	p__Lentisphaerae	c__Lentisphaeria	o__Victivallales	f__unidentified_Victivallales	g__unidentified_Victivallales	s__Bacteroidales_bacterium_55_9	0	3	0	0	0	0	0	0	0	0	0	0	0	0	0	0	0	0	0	0	0	0	0	0	0	0	0	0	1	0	0	0	0	0	0	0	0	0	0	0
OTU_1854	k__Bacteria	p__Firmicutes	c__Clostridia	o__Clostridiales	f__Peptococcaceae	g__	s__	1	2	0	0	0	2	0	3	0	0	0	0	0	0	0	0	0	0	0	0	0	0	0	0	0	0	4	0	7	6	0	0	0	0	2	1	10	0	0	2
OTU_1855	k__Bacteria	p__Firmicutes	c__Clostridia	o__Clostridiales	f__Lachnospiraceae	Others	Others	0	0	0	0	0	0	0	0	14	0	0	0	40	0	0	0	0	0	0	0	0	0	2	0	0	0	0	0	0	0	0	0	0	0	0	0	0	0	1	0
OTU_1856	k__Bacteria	p__unidentified_Bacteria	c__unidentified_Bacteria	o__Campylobacterales	f__Helicobacteraceae	g__Helicobacter	Others	2	3	9	1	1	7	0	3	0	0	2	7	2	0	7	0	2	0	3	0	2	0	8	2	2	5	7	1	0	0	3	5	15	0	0	46	12	2	0	10
OTU_1859	k__Bacteria	p__Firmicutes	c__Clostridia	o__Clostridiales	f__Lachnospiraceae	Others	Others	0	0	0	0	0	0	0	0	0	0	0	0	0	0	0	0	0	0	0	0	0	0	0	0	0	0	0	0	0	0	0	0	0	0	0	53	0	0	0	0
OTU_1860	k__Bacteria	p__Firmicutes	c__Erysipelotrichia	o__Erysipelotrichales	f__Erysipelotrichaceae	g__Ileibacterium	s__Ileibacterium_valens	564	3157	691	830	275	974	0	256	1640	1341	49	4	18	920	61	2	202	4419	508	2883	755	415	0	1448	2	189	696	4	1	7	924	27	0	1057	0	1	2032	905	2477	0
OTU_1863	k__Bacteria	p__Bacteroidetes	c__Ignavibacteria	o__	f__	g__	s__	0	0	0	0	0	0	0	0	0	0	0	0	0	0	0	0	0	0	0	0	0	0	0	0	0	0	0	1	0	0	0	0	0	0	0	0	0	0	0	0
OTU_1864	k__Bacteria	p__Firmicutes	c__Clostridia	o__Clostridiales	f__Lachnospiraceae	g__Roseburia	s__	0	2	0	0	0	0	1	1	0	0	0	0	3	0	2	2	8	0	0	0	0	0	0	0	0	0	0	0	1	0	0	0	0	3	4	0	0	0	0	1
OTU_1865	k__Bacteria	p__Bacteroidetes	c__Bacteroidia	o__Bacteroidales	f__Prevotellaceae	Others	Others	0	24	0	0	0	0	0	0	0	0	0	0	0	0	0	0	0	0	0	0	0	0	0	0	0	0	0	0	7	0	0	0	0	0	0	0	0	0	0	0
OTU_1866	k__Bacteria	p__Firmicutes	c__Negativicutes	o__Selenomonadales	f__Acidaminococcaceae	g__	s__	0	0	0	0	0	16	0	0	0	0	0	0	0	0	0	0	0	0	0	0	0	0	0	0	0	0	0	0	0	0	0	0	0	0	0	0	0	0	0	0
OTU_1867	k__Bacteria	p__Firmicutes	c__Erysipelotrichia	o__Erysipelotrichales	f__Erysipelotrichaceae	g__Dubosiella	s__	0	0	0	0	0	0	7	0	15	2	1	1	0	0	3	0	0	0	2	3	2	0	0	3	0	2	0	0	0	0	10	1	2	1	0	0	0	0	0	0
OTU_1868	k__Bacteria	p__Firmicutes	c__Clostridia	o__Clostridiales	f__Lachnospiraceae	Others	Others	0	0	0	0	0	0	0	0	0	0	0	0	0	0	0	0	0	0	0	0	0	0	0	0	0	0	0	0	6	0	0	0	0	0	0	0	0	0	0	0
OTU_1869	k__Bacteria	p__Firmicutes	c__Clostridia	o__Clostridiales	f__Ruminococcaceae	Others	Others	0	0	0	0	0	0	0	0	0	0	0	0	0	4	3	0	0	0	0	0	0	0	3	2	0	0	0	15	17	0	0	0	0	0	0	0	0	1	0	4
OTU_1870	k__Bacteria	p__Firmicutes	c__Bacilli	o__Bacillales	f__Paenibacillaceae	g__Aneurinibacillus	s__Aneurinibacillus_soli	0	0	0	0	0	2	0	0	0	0	0	0	0	0	0	0	0	0	0	0	0	0	0	0	0	0	0	0	0	0	0	0	0	0	0	0	0	0	0	0
OTU_1871	k__Bacteria	p__Bacteroidetes	c__Bacteroidia	o__Bacteroidales	f__Muribaculaceae	g__	s__	15	1	7	2	5	0	4	5	0	0	2	13	0	0	2	2	5	1	22	7	0	3	10	2	12	10	3	3	4	0	0	6	6	3	5	0	2	4	17	2
OTU_1873	k__Bacteria	p__Firmicutes	c__Clostridia	o__Clostridiales	f__Lachnospiraceae	Others	Others	0	0	0	0	0	0	0	0	0	0	0	0	0	0	0	0	2	0	0	0	0	0	0	0	0	0	0	1	0	0	0	0	0	0	0	0	0	0	0	0
OTU_1874	k__Bacteria	p__unidentified_Bacteria	c__unidentified_Bacteria	o__Campylobacterales	f__Helicobacteraceae	g__Helicobacter	s__Helicobacter_ganmani	0	0	0	0	0	0	0	2	0	0	0	0	0	0	0	0	0	0	0	0	0	0	2	0	0	0	0	0	0	0	0	0	0	0	0	0	0	0	0	0
OTU_1876	k__Bacteria	p__Firmicutes	c__Negativicutes	o__Selenomonadales	f__Veillonellaceae	g__Megasphaera	s__Megasphaera_elsdenii	0	0	0	0	0	0	0	0	0	0	0	0	0	0	0	0	0	0	0	0	0	0	1	0	0	0	0	0	0	0	0	0	0	0	0	0	0	0	0	0
OTU_1879	k__Bacteria	p__Firmicutes	c__Clostridia	o__Clostridiales	f__Lachnospiraceae	g__unidentified_Lachnospiraceae	s__Clostridium_sp_Clone-46	87	11	2	103	1	0	10	13	0	0	30	174	46	10	43	6	8	1	0	3	2	2	6	9	70	4	0	3	3	0	0	23	13	57	59	0	1	1	11	8
OTU_1880	k__Bacteria	p__Firmicutes	c__Clostridia	o__Clostridiales	f__Lachnospiraceae	Others	Others	0	0	0	3	0	0	4	0	0	0	0	0	0	0	0	0	0	0	0	0	0	0	0	0	0	0	0	0	0	0	0	0	0	0	0	0	0	0	0	0
OTU_1881	k__Bacteria	p__Firmicutes	c__Clostridia	o__Clostridiales	f__Lachnospiraceae	Others	Others	0	0	0	0	0	0	0	0	0	0	0	0	0	0	0	0	0	0	0	0	0	0	0	0	0	0	0	0	0	0	0	0	0	0	0	0	0	1	0	0
OTU_1882	k__Bacteria	p__Proteobacteria	c__Deltaproteobacteria	Others	Others	Others	Others	0	1	0	0	0	0	0	0	0	0	0	0	0	0	0	0	0	0	0	0	0	0	0	0	0	0	0	0	0	0	0	0	0	0	0	0	0	0	0	0
OTU_1883	k__Bacteria	p__Bacteroidetes	c__Bacteroidia	o__Bacteroidales	f__	g__	s__	0	0	0	0	0	4	0	0	0	0	0	0	0	0	0	0	0	0	0	0	0	0	0	0	0	0	0	0	0	0	0	0	0	0	0	0	0	0	0	0
OTU_1884	k__Bacteria	p__unidentified_Bacteria	c__unidentified_Bacteria	o__Campylobacterales	f__Helicobacteraceae	g__Helicobacter	Others	2	9	62	11	4	7	7	4	2	1	28	76	7	0	35	0	33	1	0	0	3	0	51	1	4	17	8	23	1	4	3	12	75	8	0	12	10	20	12	48
OTU_1885	k__Bacteria	p__Proteobacteria	c__Deltaproteobacteria	o__Desulfovibrionales	f__Desulfovibrionaceae	g__Desulfovibrio	Others	0	0	0	0	0	2	0	0	1	0	3	0	0	0	0	0	0	0	0	0	0	0	0	0	1	0	0	0	0	0	0	0	0	0	0	0	0	0	0	0
OTU_1888	k__Bacteria	p__Proteobacteria	c__Alphaproteobacteria	o__Rhizobiales	f__Beijerinckiaceae	g__Methylobacterium	Others	0	0	0	0	0	0	0	4	0	3	0	0	0	0	0	0	0	0	0	0	0	0	0	0	0	0	0	0	0	0	0	0	0	0	0	0	0	0	2	0
OTU_1890	k__Bacteria	p__Synergistetes	c__Synergistia	o__Synergistales	f__Synergistaceae	Others	Others	0	0	0	0	0	1	0	0	0	0	0	0	0	0	0	0	0	0	0	0	0	0	0	0	0	0	0	0	0	0	0	0	0	0	0	0	0	0	0	0
OTU_1892	k__Bacteria	p__Bacteroidetes	c__Bacteroidia	o__Bacteroidales	f__Bacteroidaceae	g__Bacteroides	s__Bacteroides_caecigallinarum	0	0	0	0	0	0	0	0	0	0	0	0	0	0	0	0	0	0	0	0	0	0	0	2	0	0	0	0	0	0	0	0	0	0	0	0	0	0	0	0
OTU_1894	k__Bacteria	p__Firmicutes	c__Clostridia	o__Clostridiales	f__Lachnospiraceae	Others	Others	0	0	0	2	0	0	0	0	0	0	0	0	0	2	0	0	0	0	0	0	0	0	0	13	0	0	0	0	0	0	0	0	0	0	0	0	0	0	0	0
OTU_1895	k__Bacteria	Others	Others	Others	Others	Others	Others	0	0	0	0	0	0	0	0	0	0	0	0	0	0	0	0	0	0	0	0	0	0	0	0	0	1	0	0	0	0	0	0	0	0	0	0	0	0	0	0
OTU_1897	k__Bacteria	p__Firmicutes	c__Erysipelotrichia	o__Erysipelotrichales	f__Erysipelotrichaceae	g__Dubosiella	s__	25	5	4	0	25	22	7	19	0	7	11	1	0	2	0	54	12	2	30	2	2	7	2	3	0	4	0	2	2	0	4	0	0	15	0	2	2	6	2	1
OTU_1899	k__Archaea	p__	c__	o__	f__	g__	s__	0	0	0	0	0	0	0	0	0	0	0	0	0	0	0	0	0	0	0	0	0	0	0	0	0	0	0	2	0	0	0	0	0	0	0	0	0	0	0	0
OTU_1900	k__Bacteria	p__Bacteroidetes	c__Bacteroidia	o__Bacteroidales	f__Bacteroidaceae	g__Bacteroides	s__Bacteroides_sp	0	1	0	0	0	0	0	0	0	0	0	0	0	0	0	0	0	0	0	0	0	0	0	0	0	0	0	0	0	0	0	0	0	0	0	0	0	0	0	0
OTU_1901	k__Bacteria	p__Firmicutes	c__Erysipelotrichia	o__Erysipelotrichales	f__Erysipelotrichaceae	g__Faecalibaculum	Others	0	0	0	0	0	0	0	0	0	0	0	0	0	0	0	0	0	0	0	5	0	0	0	0	0	0	0	0	0	12	0	5	0	0	0	0	4	3	0	0
OTU_1902	k__Bacteria	p__Firmicutes	c__Clostridia	o__Clostridiales	f__Lachnospiraceae	Others	Others	0	0	0	0	0	0	0	0	0	0	0	0	0	0	0	0	0	0	0	0	0	0	0	0	0	0	0	2	0	0	0	2	0	0	0	0	0	0	0	0
OTU_1903	k__Bacteria	p__Firmicutes	c__Clostridia	o__Clostridiales	f__unidentified_Clostridiales	g__Proteiniclasticum	Others	0	0	0	0	0	0	0	0	0	0	0	0	0	0	0	0	0	0	0	0	0	0	0	0	0	0	0	0	0	0	0	0	4	0	0	0	0	0	0	0
OTU_1905	k__Bacteria	p__Bacteroidetes	c__Bacteroidia	o__Bacteroidales	f__Muribaculaceae	g__	s__	23	12	2	3	0	2	3	1	0	1	3	6	23	0	2	28	1	2	19	4	6	0	6	3	20	3	1	6	12	5	0	0	14	2	19	71	21	2	19	6
OTU_1907	k__Bacteria	p__Bacteroidetes	c__Bacteroidia	o__Bacteroidales	f__Muribaculaceae	g__	s__	0	0	0	0	0	0	0	0	0	0	0	0	0	0	0	0	0	0	0	0	0	0	0	0	0	0	0	0	0	0	0	0	0	0	0	0	0	0	0	0
OTU_1909	k__Bacteria	p__Firmicutes	c__Clostridia	o__Clostridiales	f__Lachnospiraceae	Others	Others	0	0	0	0	0	0	0	0	0	0	0	0	2	10	0	0	2	0	0	0	0	0	0	0	0	0	0	1	0	2	0	0	0	0	0	0	1	0	0	0
OTU_1911	k__Bacteria	p__Firmicutes	c__Bacilli	o__Lactobacillales	f__Streptococcaceae	g__Lactococcus	Others	0	1	0	3	0	0	0	2	0	0	0	0	0	0	0	0	0	0	0	0	0	0	1	0	0	0	0	0	0	0	0	0	0	0	0	1	0	0	0	0
OTU_1912	k__Bacteria	p__Firmicutes	c__Clostridia	o__Clostridiales	f__Ruminococcaceae	Others	Others	0	0	0	2	0	0	30	0	0	0	2	0	0	18	23	33	0	2	0	0	6	3	0	5	8	0	0	0	0	0	0	0	5	0	0	0	0	1	0	9
OTU_1913	k__Bacteria	p__Firmicutes	c__Clostridia	o__Clostridiales	f__unidentified_Clostridiales	Others	Others	0	0	0	0	3	0	0	0	0	1	4	0	3	6	0	0	0	0	0	0	0	0	0	0	0	2	0	0	0	0	0	5	0	0	0	0	0	5	0	0
OTU_1915	k__Bacteria	p__Firmicutes	c__Erysipelotrichia	o__Erysipelotrichales	f__Erysipelotrichaceae	g__Ileibacterium	s__Ileibacterium_valens	10	14	12	22	5	3	0	4	1	5	0	0	0	9	0	0	1	6	0	17	11	10	0	4	0	0	7	0	0	0	2	0	0	4	0	0	60	8	5	0
OTU_1922	k__Bacteria	p__Bacteroidetes	c__Bacteroidia	o__Chitinophagales	f__Chitinophagaceae	g__Terrimonas	s__	0	1	0	0	0	0	0	0	0	0	0	0	0	0	0	0	0	0	0	0	0	0	0	0	0	0	0	0	0	0	0	0	0	0	2	0	0	0	0	0
OTU_1923	k__Bacteria	p__Firmicutes	c__Clostridia	o__Clostridiales	f__Lachnospiraceae	Others	Others	0	0	0	0	0	0	0	0	0	0	0	0	6	0	0	2	0	0	0	0	0	0	0	0	0	0	0	0	0	1	0	0	0	0	0	0	0	0	0	0
OTU_1924	k__Bacteria	p__Proteobacteria	c__Gammaproteobacteria	o__unidentified_Gammaproteobacteria	f__Burkholderiaceae	Others	Others	0	1	0	0	0	0	0	0	0	0	0	0	0	0	0	0	0	0	0	0	0	0	0	0	0	0	0	0	0	0	0	0	0	0	0	0	0	0	0	0
OTU_1926	k__Bacteria	p__Firmicutes	c__Clostridia	o__Clostridiales	f__Lachnospiraceae	Others	Others	0	0	0	0	0	0	0	0	0	0	0	0	1	23	0	3	0	0	0	0	0	0	0	3	0	0	0	0	0	0	0	0	0	0	149	0	0	2	2	0
OTU_1927	k__Bacteria	p__Firmicutes	c__Clostridia	o__Clostridiales	f__Lachnospiraceae	Others	Others	0	0	0	0	0	0	0	0	0	0	0	0	0	0	4	0	0	0	0	0	0	0	0	0	0	0	0	0	0	0	0	33	30	0	0	0	0	0	0	0
OTU_1928	k__Bacteria	p__Firmicutes	c__Bacilli	o__Lactobacillales	f__Streptococcaceae	g__Streptococcus	s__Streptococcus_azizii	0	0	0	0	2	0	0	1	0	0	3	2	1	1	0	0	0	1	1	0	2	3	5	0	1	2	6	0	5	0	0	2	0	0	3	0	0	0	0	0
OTU_1929	k__Bacteria	p__Firmicutes	c__Clostridia	o__Clostridiales	f__Lachnospiraceae	Others	Others	0	1	0	0	0	0	0	0	2	0	0	0	7	5	0	0	0	5	0	1	0	0	0	0	2	7	0	0	0	0	2	0	0	0	0	0	0	2	2	0
OTU_1930	k__Bacteria	p__Chloroflexi	Others	Others	Others	Others	Others	0	0	0	0	0	0	0	0	0	0	0	0	0	0	0	0	0	0	0	0	0	0	0	0	0	0	0	0	0	0	0	0	0	0	0	0	0	0	0	0
OTU_1931	k__Bacteria	p__Bacteroidetes	c__Bacteroidia	o__Bacteroidales	f__Muribaculaceae	g__	s__	5	4	2	5	3	5	12	16	0	1	2	0	6	0	24	28	10	6	16	4	47	3	20	3	33	1	9	25	19	0	3	7	21	8	0	34	10	0	32	0
OTU_1933	k__Bacteria	p__Firmicutes	c__Bacilli	o__Bacillales	f__unidentified_Bacillales	g__Exiguobacterium	s__Exiguobacterium_aurantiacum	0	0	0	0	0	0	0	0	0	0	0	0	0	0	0	0	0	0	0	0	0	0	0	0	0	0	0	0	0	0	0	0	0	0	0	0	0	0	0	0
OTU_1934	k__Bacteria	p__Firmicutes	c__Clostridia	o__Clostridiales	f__Lachnospiraceae	Others	Others	0	0	0	0	0	0	0	0	0	0	0	0	0	0	0	0	0	0	0	0	0	0	0	0	0	0	0	0	0	0	1	0	0	0	0	0	54	0	0	0
OTU_1936	k__Bacteria	p__Actinobacteria	c__Thermoleophilia	o__Solirubrobacterales	f__	g__	s__	0	0	0	0	0	0	0	0	0	0	0	0	0	0	0	0	0	0	0	0	0	0	0	1	0	0	0	0	0	0	0	0	0	0	0	0	0	0	0	0
OTU_1938	k__Bacteria	p__Firmicutes	c__Bacilli	o__Bacillales	f__Bacillaceae	g__Bacillus	Others	0	5	0	0	0	0	0	0	0	0	0	0	0	0	0	0	0	0	0	0	0	0	0	0	0	0	4	0	0	0	0	0	0	0	0	0	0	0	13	0
OTU_1939	k__Bacteria	p__Firmicutes	c__Clostridia	o__Clostridiales	f__Lachnospiraceae	Others	Others	0	0	4	0	2	0	12	6	0	0	0	4	0	2	0	0	0	0	0	0	0	0	0	0	6	19	0	0	62	0	1	0	0	0	0	0	0	0	0	0
OTU_1941	k__Bacteria	p__Firmicutes	c__Clostridia	o__Clostridiales	f__Lachnospiraceae	Others	Others	0	0	0	0	0	0	3	0	0	0	0	0	0	0	0	0	0	0	0	0	0	0	0	0	0	0	0	0	0	0	0	0	0	0	0	0	0	0	0	0
OTU_1942	k__Bacteria	p__Proteobacteria	c__Gammaproteobacteria	o__unidentified_Gammaproteobacteria	f__Burkholderiaceae	g__Advenella	s__	0	0	0	0	0	0	0	0	0	0	0	0	0	0	0	0	0	0	0	0	0	0	0	0	0	0	0	0	0	0	0	0	0	0	0	0	1	0	0	0
OTU_1943	k__Bacteria	p__Firmicutes	c__Clostridia	o__Clostridiales	Others	Others	Others	0	0	0	0	0	0	0	0	0	0	0	0	0	0	0	0	0	0	0	0	0	0	0	0	0	0	0	0	3	0	0	0	0	0	0	0	0	0	0	0
OTU_1945	k__Bacteria	p__Firmicutes	c__Erysipelotrichia	o__Erysipelotrichales	f__Erysipelotrichaceae	g__Dubosiella	s__	0	0	0	0	0	4	1	1	23	5	6	3	0	1	3	0	0	0	0	5	0	0	1	0	0	12	10	0	0	3	13	3	1	2	1	27	2	0	8	6
OTU_1946	k__Bacteria	p__Bacteroidetes	c__Bacteroidia	o__Bacteroidales	f__Bacteroidaceae	g__Bacteroides	Others	2	0	2	0	0	0	0	0	0	0	2	0	0	0	0	0	3	0	0	0	0	0	0	0	3	0	0	0	0	0	0	0	0	0	0	0	0	0	0	0
OTU_1948	k__Bacteria	p__Firmicutes	c__Erysipelotrichia	o__Erysipelotrichales	f__Erysipelotrichaceae	g__Turicibacter	Others	0	0	0	0	0	0	0	0	0	0	0	0	0	0	0	0	0	3	0	0	0	0	0	1	0	0	0	0	0	0	0	0	0	0	0	1	0	0	0	1
OTU_1949	k__Bacteria	p__Chloroflexi	c__Anaerolineae	o__unidentified_Anaerolineae	f__unidentified_Anaerolineae	g__unidentified_Anaerolineae	s__anaerobic_bacterium_MO-CFX2	0	0	0	0	0	8	0	0	0	0	0	0	0	0	0	0	0	0	0	0	0	0	0	0	0	0	0	0	0	0	0	0	0	0	0	0	0	0	0	0
OTU_1951	k__Bacteria	p__Synergistetes	c__Synergistia	o__Synergistales	f__Synergistaceae	g__	s__	0	0	0	0	0	7	0	0	0	0	0	0	0	0	0	0	0	0	0	0	0	0	0	0	0	0	0	0	0	0	0	0	0	0	0	0	0	0	0	0
OTU_1952	k__Bacteria	p__Firmicutes	c__Clostridia	o__Clostridiales	f__Lachnospiraceae	g__Roseburia	s__Eubacterium_plexicaudatum	0	0	0	0	0	0	3	5	0	0	5	0	0	279	0	391	2	3	23	4	3	0	4	2	61	296	234	7	145	0	0	31	3	0	31	52	0	3	2	2
OTU_1953	k__Bacteria	p__Actinobacteria	c__Coriobacteriia	o__Coriobacteriales	f__Atopobiaceae	g__	s__	4	0	3	0	0	0	0	0	0	0	0	0	0	4	0	0	0	0	0	13	2	0	0	0	0	0	0	0	0	0	0	0	0	0	0	0	2	6	10	0
OTU_1954	k__Bacteria	Others	Others	Others	Others	Others	Others	0	0	0	0	0	3	0	0	0	0	0	0	0	0	0	0	0	0	0	0	0	0	0	0	0	0	0	0	0	0	0	0	0	0	0	0	0	0	0	0
OTU_1955	k__Bacteria	p__Proteobacteria	c__Gammaproteobacteria	o__unidentified_Gammaproteobacteria	Others	Others	Others	0	7	0	0	0	0	0	0	0	0	0	0	0	0	0	0	0	0	0	0	0	0	0	4	0	0	0	0	0	0	0	0	0	0	0	0	0	0	0	0
OTU_1956	k__Bacteria	p__Firmicutes	c__Clostridia	o__Clostridiales	f__unidentified_Clostridiales	g__unidentified_Clostridiales	Others	0	0	0	0	0	2	0	0	0	0	0	0	0	0	0	0	0	0	0	0	0	0	0	0	0	0	0	0	0	0	0	0	0	0	0	0	0	0	0	0
OTU_1958	k__Bacteria	Others	Others	Others	Others	Others	Others	0	0	0	0	0	1	0	0	0	0	0	0	0	0	0	0	0	0	0	0	0	0	0	0	0	0	0	0	0	0	0	0	0	0	0	0	0	0	0	0
OTU_1959	k__Bacteria	p__Proteobacteria	c__Deltaproteobacteria	o__unidentified_Deltaproteobacteria	f__unidentified_Deltaproteobacteria	g__unidentified_Deltaproteobacteria	s__Deltaproteobacteria_bacterium_CSP1-8	0	0	0	0	0	5	0	0	0	1	0	0	0	0	0	0	0	0	0	0	0	0	0	0	0	0	0	0	0	0	1	0	0	0	0	0	0	0	0	0
OTU_1960	k__Bacteria	p__Bacteroidetes	c__Bacteroidia	o__Bacteroidales	f__Muribaculaceae	g__	s__	0	0	0	0	0	0	0	0	0	0	0	0	0	0	0	0	0	0	0	0	0	0	1	0	0	0	0	0	0	0	0	0	0	0	0	0	0	0	0	0
OTU_1961	k__Bacteria	p__Firmicutes	c__Clostridia	o__Clostridiales	f__Lachnospiraceae	Others	Others	23	7	6	24	5	0	23	13	0	3	0	0	2	12	3	3	0	3	1	0	0	2	0	1	14	2	0	1	0	0	0	1	0	4	11	0	0	2	0	0
OTU_1966	k__Bacteria	p__Firmicutes	c__Erysipelotrichia	o__Erysipelotrichales	f__Erysipelotrichaceae	g__Dubosiella	s__	788	173	172	83	2442	897	287	1255	15	325	388	37	11	137	3	1109	178	69	971	22	72	172	86	375	10	45	3	58	19	1	8	6	1	412	0	8	35	397	28	21
OTU_1967	k__Bacteria	p__Firmicutes	c__Clostridia	o__Clostridiales	f__Lachnospiraceae	Others	Others	0	4	0	0	0	0	0	0	0	0	0	0	1	0	0	0	0	0	0	0	0	0	0	0	0	0	0	0	0	0	0	0	0	0	4	0	0	0	0	0
OTU_1968	k__Bacteria	p__Actinobacteria	c__	o__	f__	g__	s__	0	0	0	0	0	0	0	0	0	0	0	0	0	0	0	0	0	0	0	0	0	0	0	0	0	0	0	0	0	0	0	0	0	0	0	0	0	0	0	0
OTU_1970	k__Bacteria	p__Firmicutes	c__Erysipelotrichia	o__Erysipelotrichales	f__Erysipelotrichaceae	Others	Others	0	0	1	0	6	3	8	0	0	3	0	0	0	0	0	2	2	0	0	2	0	0	0	0	0	0	0	0	0	0	1	0	0	2	0	0	0	1	0	0
OTU_1971	k__Bacteria	p__Firmicutes	c__Clostridia	o__Clostridiales	f__Ruminococcaceae	g__unidentified_Ruminococcaceae	s__[Clostridium]_papyrosolvens	0	0	0	0	0	0	0	0	2	0	1	0	0	0	0	0	0	2	1	0	0	0	0	0	0	0	0	0	0	0	0	0	0	0	0	0	0	2	0	0
OTU_1972	k__Bacteria	p__Proteobacteria	c__Deltaproteobacteria	o__Oligoflexales	f__Oligoflexaceae	g__	s__	0	1	0	0	0	0	0	0	0	0	0	0	0	0	0	0	0	0	0	0	0	0	0	0	0	0	0	0	0	0	0	0	0	0	0	0	0	0	0	0
OTU_1973	k__Bacteria	p__Firmicutes	c__Bacilli	o__Bacillales	f__Paenibacillaceae	g__Paenibacillus	Others	0	2	0	0	0	0	0	0	0	0	0	0	0	0	0	0	0	0	0	0	0	0	0	0	0	0	0	0	0	0	0	0	0	0	0	0	0	0	0	0
OTU_1974	k__Bacteria	p__Firmicutes	c__Bacilli	o__Lactobacillales	f__Lactobacillaceae	g__Lactobacillus	Others	0	2	4	0	1	7	0	4	13	5	4	4	100	6	0	5	2	2	55	5	0	4	0	0	9	8	13	0	5	254	4	9	4	2	1	4	6	1	15	3
OTU_1977	k__Bacteria	p__Firmicutes	c__Clostridia	o__Clostridiales	f__Ruminococcaceae	Others	Others	0	0	4	0	3	1	0	0	0	0	24	0	10	2	0	5	0	0	5	0	2	0	0	0	1	0	0	7	16	102	0	4	0	0	0	1	1	0	0	14
OTU_1978	k__Bacteria	p__Gemmatimonadetes	c__unidentified_Gemmatimonadetes	o__Gemmatimonadales	f__Gemmatimonadaceae	g__	s__	0	2	0	0	0	0	0	0	0	0	0	0	0	0	0	0	0	0	0	0	0	0	0	0	0	0	0	0	0	0	0	0	0	0	0	0	0	0	0	0
OTU_1979	k__Bacteria	p__Firmicutes	c__Bacilli	o__Bacillales	Others	Others	Others	0	14	0	0	0	0	0	0	0	0	0	0	0	0	0	0	0	0	0	0	0	0	0	0	0	0	0	0	0	0	0	0	0	0	0	0	0	0	0	0
OTU_1981	k__Bacteria	p__Firmicutes	c__Erysipelotrichia	o__Erysipelotrichales	f__Erysipelotrichaceae	Others	Others	0	0	0	0	0	0	0	0	0	0	0	0	0	0	0	0	0	0	0	0	0	0	0	0	0	0	0	0	0	13	0	0	0	0	0	2	7	0	0	0
OTU_1982	k__Bacteria	p__Bacteroidetes	c__Bacteroidia	o__Bacteroidales	f__Muribaculaceae	g__	s__	0	6	0	0	0	0	2	0	0	0	0	0	0	0	1	0	0	0	1	0	0	0	0	0	1	0	0	0	2	0	0	0	0	0	0	0	3	0	0	0
OTU_1983	k__Bacteria	p__Bacteroidetes	c__Bacteroidia	o__Flavobacteriales	f__Flavobacteriaceae	g__Flavobacterium	Others	0	0	0	0	0	0	0	0	0	0	0	0	0	0	0	0	0	0	0	0	0	0	0	2	0	0	0	0	0	0	0	0	0	0	0	0	0	0	0	0
OTU_1986	k__Bacteria	p__Firmicutes	c__Clostridia	o__Clostridiales	f__Lachnospiraceae	Others	Others	0	0	0	0	0	0	0	0	0	0	0	0	0	0	0	0	1	0	0	0	0	0	0	0	0	0	0	0	0	0	0	0	0	0	0	0	0	0	0	0
OTU_1987	k__Bacteria	Others	Others	Others	Others	Others	Others	0	0	0	0	0	0	0	3	0	0	0	0	0	0	0	0	0	0	0	0	0	0	0	0	0	0	0	0	0	0	0	0	0	0	0	0	0	0	0	0
OTU_1988	k__Bacteria	p__Gemmatimonadetes	c__unidentified_Gemmatimonadetes	o__Gemmatimonadales	f__Gemmatimonadaceae	g__	s__	0	0	0	0	0	0	0	0	0	0	0	0	0	0	0	0	0	0	0	0	0	0	0	0	0	1	0	0	0	0	0	0	0	0	0	0	0	0	0	0
OTU_1989	k__Bacteria	p__Gemmatimonadetes	Others	Others	Others	Others	Others	0	0	0	0	0	0	0	5	0	0	0	0	0	0	0	0	0	0	0	0	0	0	0	0	0	0	0	0	0	0	0	0	0	0	0	0	0	0	0	0
OTU_1990	k__Bacteria	p__Armatimonadetes	c__	o__	f__	g__	s__	0	0	0	0	0	2	0	0	0	0	0	0	0	0	0	0	0	0	0	0	0	0	0	0	0	0	0	0	0	0	0	0	0	0	0	0	0	0	0	0
OTU_1991	k__Bacteria	p__Bacteroidetes	c__Bacteroidia	o__Bacteroidales	f__Prevotellaceae	Others	Others	0	4	0	0	0	0	0	0	0	0	0	0	0	0	0	0	0	0	0	0	0	0	0	0	0	0	0	0	0	0	0	0	0	0	0	0	0	0	0	0
OTU_1992	k__Bacteria	p__Verrucomicrobia	c__Verrucomicrobiae	o__	f__	g__	s__	0	0	0	0	0	0	0	0	0	0	0	0	0	0	0	0	0	0	0	0	0	0	0	0	0	0	0	2	0	0	0	0	0	0	0	0	0	0	0	0
OTU_1994	k__Bacteria	p__Firmicutes	c__Clostridia	o__Clostridiales	f__Lachnospiraceae	Others	Others	0	0	3	0	0	0	0	0	2	0	0	0	7	28	0	0	0	0	0	0	0	1	0	2	0	0	0	0	0	0	0	0	0	0	4	0	0	0	2	0
OTU_1995	k__Bacteria	p__Firmicutes	c__Clostridia	o__Clostridiales	f__Ruminococcaceae	Others	Others	0	0	0	0	0	0	0	0	0	0	0	0	0	0	0	0	0	0	0	0	0	0	0	0	0	0	0	0	0	0	0	0	0	0	0	0	0	1	0	0
OTU_1996	k__Bacteria	p__Bacteroidetes	c__Bacteroidia	o__Bacteroidales	f__Bacteroidaceae	g__Bacteroides	Others	0	0	0	0	0	0	0	0	0	0	0	0	0	0	0	0	0	0	0	0	0	0	0	0	0	0	0	0	0	0	0	0	0	0	0	0	0	0	0	0
OTU_1997	k__Bacteria	p__Firmicutes	c__Clostridia	o__Clostridiales	f__Ruminococcaceae	Others	Others	0	0	0	0	0	0	0	0	0	0	0	0	0	0	0	0	2	0	0	0	0	0	0	0	0	0	0	0	0	0	0	0	0	0	0	0	0	0	0	0
OTU_1998	k__Bacteria	p__Acidobacteria	c__Acidobacteriia	o__Solibacterales	f__unidentified_Solibacterales	g__Bryobacter	s__	0	0	1	0	0	0	0	0	0	0	0	0	0	0	0	0	0	0	0	0	0	0	0	0	0	0	0	0	0	0	0	0	0	0	0	0	0	0	0	0
OTU_1999	k__Bacteria	p__Bacteroidetes	c__Bacteroidia	o__Bacteroidales	f__Muribaculaceae	Others	Others	0	0	0	0	0	0	0	0	0	0	0	0	0	0	0	0	0	0	2	0	0	0	0	0	0	0	0	0	0	0	0	0	0	0	0	1	0	0	0	0
OTU_2001	k__Bacteria	p__Firmicutes	c__Clostridia	o__Clostridiales	f__Lachnospiraceae	Others	Others	13	5	0	0	1	0	0	1	2	4	31	0	2	3	1	44	0	0	0	0	0	0	1	0	3	0	0	2	0	1	2	4	2	27	3	0	0	0	0	3
OTU_2002	k__Bacteria	p__Proteobacteria	c__Gammaproteobacteria	Others	Others	Others	Others	0	4	0	0	0	0	0	1	0	0	0	0	0	0	0	6	0	0	1	0	0	0	0	0	0	0	0	0	0	0	0	0	0	0	0	0	0	0	0	0
OTU_2004	k__Bacteria	p__Bacteroidetes	c__Bacteroidia	o__Bacteroidales	f__Bacteroidaceae	g__Bacteroides	Others	56	4	5	3	0	2	19	6	0	0	4	1	14	0	6	5	6	3	17	12	7	2	0	3	84	4	0	0	3	0	0	0	8	4	14	9	10	4	43	11
OTU_2005	k__Bacteria	p__Proteobacteria	c__Alphaproteobacteria	o__Caulobacterales	f__Caulobacteraceae	g__Phenylobacterium	Others	0	1	0	0	0	0	0	0	0	0	0	0	0	0	0	0	0	0	0	0	0	0	0	1	0	0	0	0	0	0	0	0	0	0	0	0	0	0	0	0
OTU_2006	k__Bacteria	p__Firmicutes	c__Clostridia	o__Clostridiales	f__Lachnospiraceae	Others	Others	0	10	0	0	0	0	2	0	0	1	2	0	16	0	0	0	0	0	0	3	2	0	0	4	0	4	0	4	5	0	0	4	0	5	1	1	0	1	0	0
OTU_2007	k__Bacteria	p__Firmicutes	c__Clostridia	o__Clostridiales	f__Lachnospiraceae	Others	Others	0	0	0	0	0	0	0	0	0	0	0	0	0	0	0	0	0	0	0	0	0	0	0	0	1	0	0	0	0	0	0	0	0	0	0	0	0	0	0	0
OTU_2008	k__Bacteria	p__Firmicutes	c__Clostridia	o__Clostridiales	f__Lachnospiraceae	g__unidentified_Lachnospiraceae	s__Clostridium_sp_Marseille-P3244	0	0	0	0	0	3	0	0	0	0	0	0	0	0	0	0	0	0	0	0	0	0	0	0	0	0	0	0	0	0	0	0	0	0	0	0	0	0	0	0
OTU_2009	k__Bacteria	p__Firmicutes	c__Clostridia	o__Clostridiales	f__Ruminococcaceae	Others	Others	0	0	0	0	1	1	0	0	0	0	40	2	12	2	0	10	0	0	11	1	0	0	0	2	9	3	0	1	0	3	0	7	0	2	0	1	0	0	5	0
OTU_2010	k__Bacteria	p__Firmicutes	c__Erysipelotrichia	o__Erysipelotrichales	f__Erysipelotrichaceae	g__Dubosiella	s__	3	3	10	0	12	35	18	15	0	16	6	2	0	1	0	18	11	4	24	2	4	3	8	5	0	0	0	3	1	3	0	2	3	11	0	46	26	5	0	6
OTU_2013	k__Bacteria	p__Proteobacteria	c__Alphaproteobacteria	o__Rhodobacterales	f__Rhodobacteraceae	Others	Others	0	0	0	0	0	0	0	1	0	0	0	0	0	0	0	1	0	0	0	0	0	0	0	0	0	0	0	0	0	0	0	0	4	0	0	0	0	0	1	0
OTU_2014	k__Bacteria	p__Firmicutes	c__Erysipelotrichia	o__Erysipelotrichales	f__Erysipelotrichaceae	g__Dubosiella	s__	9	1	5	2	63	45	10	51	0	24	6	2	0	4	2	24	10	5	33	2	2	5	5	6	0	2	0	0	1	0	0	1	0	22	0	0	3	10	0	3
OTU_2015	k__Bacteria	p__Firmicutes	c__Clostridia	o__Clostridiales	f__Lachnospiraceae	g__Lachnoclostridium	Others	0	4	3	0	0	2	0	0	0	0	0	2	0	0	0	0	0	0	0	0	0	0	0	0	0	0	0	1	4	0	0	0	0	2	2	2	0	0	0	0
OTU_2017	k__Bacteria	Others	Others	Others	Others	Others	Others	0	0	0	0	0	0	0	0	0	0	0	0	0	0	0	0	0	0	0	0	0	0	0	0	0	0	0	0	0	0	0	0	0	0	2	0	0	0	0	0
OTU_2020	k__Bacteria	p__unidentified_Bacteria	c__unidentified_Bacteria	o__Campylobacterales	f__Helicobacteraceae	g__Helicobacter	Others	0	1	0	0	0	0	0	0	0	0	0	0	0	0	0	0	0	0	0	0	0	0	0	0	0	0	0	0	0	0	0	0	1	1	0	0	1	0	0	0
OTU_2022	k__Bacteria	p__Bacteroidetes	c__Bacteroidia	o__Bacteroidales	f__Bacteroidaceae	g__Bacteroides	Others	8	1	0	0	0	0	3	3	0	0	0	0	0	0	0	1	1	0	2	0	0	0	2	0	16	3	0	0	1	0	0	2	0	0	0	0	0	0	6	0
OTU_2023	k__Bacteria	p__Bacteroidetes	c__Bacteroidia	o__Bacteroidales	f__Muribaculaceae	g__	s__	55	0	7	6	6	1	60	89	0	0	45	12	3	0	307	33	2	14	26	14	140	1	79	3	24	8	1	11	10	1	2	14	518	25	627	30	9	4	26	3
OTU_2024	k__Bacteria	p__Firmicutes	c__Clostridia	o__Clostridiales	f__Ruminococcaceae	Others	Others	1	1	3	0	0	0	4	0	0	0	0	0	0	0	0	0	2	0	0	0	0	0	0	1	1	0	0	0	0	3	0	0	0	6	0	3	1	0	1	0
OTU_2026	k__Bacteria	p__Actinobacteria	c__unidentified_Actinobacteria	o__Frankiales	f__Acidothermaceae	g__Acidothermus	s__	0	0	0	0	0	0	0	0	0	0	0	0	0	0	0	0	0	0	0	0	0	0	0	0	0	0	0	0	0	0	0	0	3	0	0	0	0	0	0	0
OTU_2028	k__Bacteria	p__Proteobacteria	c__Alphaproteobacteria	o__unidentified_Alphaproteobacteria	f__Acetobacteraceae	g__Acetobacter	Others	0	0	0	0	0	0	0	1	0	0	0	0	0	0	0	0	0	0	0	0	0	0	0	0	0	0	0	0	0	0	0	0	0	0	0	0	0	0	0	0
OTU_2029	k__Bacteria	p__Firmicutes	c__Clostridia	o__Clostridiales	f__Ruminococcaceae	Others	Others	1	0	0	0	0	0	0	0	0	0	0	0	0	0	0	0	0	0	1	0	0	0	0	0	0	0	0	0	0	0	0	0	0	2	2	0	0	0	0	0
OTU_2030	k__Bacteria	p__Bacteroidetes	c__Bacteroidia	o__Bacteroidales	f__Bacteroidaceae	g__Bacteroides	s__Bacteroides_massiliensis	6	0	0	0	0	0	0	0	0	0	2	0	5	0	0	2	0	1	4	3	0	0	0	2	15	0	0	0	0	0	0	3	2	0	0	0	0	0	3	1
OTU_2031	k__Bacteria	p__unidentified_Bacteria	c__unidentified_Bacteria	o__Campylobacterales	f__Helicobacteraceae	g__Helicobacter	Others	1	9	31	5	1	6	2	1	1	1	15	16	4	0	16	0	6	3	0	0	1	1	24	0	2	9	0	8	0	1	0	9	30	2	0	13	6	11	5	19
OTU_2032	k__Bacteria	p__Firmicutes	c__Clostridia	o__Clostridiales	f__Lachnospiraceae	Others	Others	0	0	0	0	0	0	8	1	0	0	0	0	14	4	0	0	1	5	0	0	0	1	0	0	0	0	0	0	0	0	0	0	0	0	0	0	0	1	0	0
OTU_2033	k__Bacteria	p__Armatimonadetes	c__	o__	f__	g__	s__	0	0	0	0	0	2	0	0	0	0	0	0	0	0	0	0	0	0	0	0	0	0	0	0	0	0	0	0	0	0	0	0	0	0	0	0	0	0	0	0
OTU_2034	k__Bacteria	p__Firmicutes	c__Erysipelotrichia	o__Erysipelotrichales	f__Erysipelotrichaceae	g__Ileibacterium	s__Ileibacterium_valens	42	113	56	60	29	72	2	27	118	158	0	0	0	93	5	0	23	251	42	238	61	40	0	107	0	19	45	0	0	2	98	2	0	125	0	0	105	104	137	0
OTU_2036	k__Bacteria	p__Bacteroidetes	c__Bacteroidia	o__Bacteroidales	f__Muribaculaceae	g__	s__	0	0	0	0	0	0	0	0	0	0	0	0	0	0	0	0	2	0	0	0	0	0	0	0	0	0	0	0	0	0	0	0	0	0	0	0	0	0	0	0
OTU_2038	k__Bacteria	p__Firmicutes	c__Clostridia	o__Clostridiales	Others	Others	Others	0	3	0	0	0	0	0	2	0	0	0	0	1	0	0	0	0	0	2	2	0	0	0	0	0	0	0	0	0	0	2	0	0	0	0	0	0	0	1	0
OTU_2039	k__Bacteria	p__Firmicutes	c__Clostridia	o__Clostridiales	f__Lachnospiraceae	Others	Others	0	0	0	0	0	1	0	0	0	0	0	0	0	0	16	0	4	0	0	0	0	0	0	0	0	0	0	0	3	0	0	0	0	0	0	0	0	0	0	0
OTU_2040	k__Bacteria	p__Proteobacteria	c__Alphaproteobacteria	o__unidentified_Alphaproteobacteria	f__unidentified_Alphaproteobacteria	g__unidentified_Alphaproteobacteria	s__Alphaproteobacteria_bacterium_CG1_02_46_17	0	1	0	0	0	0	0	0	0	0	0	0	0	0	0	0	0	0	0	0	0	0	0	0	0	0	0	0	0	0	0	0	0	0	0	0	0	0	0	0
OTU_2042	k__Bacteria	p__Firmicutes	c__Clostridia	o__Clostridiales	f__Lachnospiraceae	g__unidentified_Lachnospiraceae	s__Lachnospiraceae_bacterium_10-1	10	6	1	17	0	0	41	0	0	0	5	2	1	4	0	0	8	0	0	0	14	3	0	2	0	0	0	0	4	0	0	5	0	8	8	0	6	0	1	0
OTU_2043	k__Bacteria	p__Planctomycetes	c__Phycisphaerae	Others	Others	Others	Others	0	0	0	0	0	3	0	0	0	0	0	0	0	0	0	0	0	0	0	0	0	0	0	0	0	0	0	0	0	0	0	0	0	0	0	0	0	0	0	0
OTU_2044	k__Bacteria	p__Firmicutes	c__Clostridia	o__Clostridiales	f__Lachnospiraceae	g__Lachnoclostridium	Others	1	11	2	9	0	11	1	5	0	2	10	5	8	7	0	0	11	0	0	1	1	0	6	4	0	3	3	20	55	133	0	2	0	11	2	37	214	3	0	0
OTU_2045	k__Bacteria	p__Firmicutes	c__Clostridia	o__Clostridiales	f__Ruminococcaceae	g__unidentified_Ruminococcaceae	s__Ruminococcus_flavefaciens	0	0	0	0	0	0	0	0	0	3	0	0	0	0	0	56	2	0	0	0	0	0	0	0	19	0	0	4	6	0	0	0	7	0	0	12	0	0	0	41
OTU_2047	k__Bacteria	p__Bacteroidetes	c__Bacteroidia	o__Bacteroidales	f__Bacteroidaceae	g__Bacteroides	Others	1	0	0	0	0	0	3	0	0	0	0	0	0	0	2	6	2	0	0	0	2	0	0	0	0	1	0	0	0	0	0	0	0	0	0	0	0	1	2	0
OTU_2049	k__Bacteria	p__Firmicutes	c__Clostridia	o__Clostridiales	Others	Others	Others	0	2	1	0	0	2	3	1	0	6	0	0	0	31	1	4	0	0	20	0	0	2	5	0	23	14	0	1	3	0	3	0	0	0	12	0	6	1	0	13
OTU_2050	k__Bacteria	p__Chloroflexi	c__Chloroflexia	o__Thermomicrobiales	f__	g__	s__	0	0	0	0	0	0	0	0	0	0	0	0	0	0	0	0	0	0	0	0	0	0	0	0	0	0	0	0	0	0	0	1	0	0	0	0	0	0	0	0
OTU_2051	k__Bacteria	p__unidentified_Bacteria	c__unidentified_Bacteria	o__unidentified_Bacteria	f__unidentified_Bacteria	g__unidentified_Bacteria	Others	0	0	0	0	0	0	0	0	0	0	0	0	0	0	0	0	0	0	0	0	0	0	0	0	0	0	0	0	0	0	0	0	0	0	0	0	0	0	0	2
OTU_2052	k__Bacteria	p__Firmicutes	c__Clostridia	o__Clostridiales	f__Lachnospiraceae	Others	Others	0	3	3	1	0	7	3	0	0	3	0	0	27	6	43	0	5	9	1	2	10	104	9	15	9	21	17	39	13	2	1	6	0	0	78	93	0	25	2	0
OTU_2053	k__Bacteria	p__Firmicutes	c__Clostridia	o__Clostridiales	f__Ruminococcaceae	Others	Others	0	5	0	0	0	1	0	0	0	0	0	0	3	0	0	0	0	2	0	0	0	0	0	0	0	0	0	0	0	0	0	0	0	0	0	0	0	0	0	0
OTU_2054	k__Bacteria	p__Firmicutes	c__Clostridia	o__Clostridiales	f__Lachnospiraceae	Others	Others	0	2	0	0	3	1	0	1	0	0	0	0	20	2	0	0	0	1	0	3	0	0	0	1	2	0	0	1	0	0	1	2	0	0	1	0	0	1	3	0
OTU_2055	k__Bacteria	p__Tenericutes	c__Mollicutes	Others	Others	Others	Others	7	7	7	7	6	2	1	2	0	0	18	7	1	0	9	11	0	0	5	0	0	2	13	4	4	5	0	0	19	0	0	0	4	0	6	10	0	5	0	76
OTU_2056	k__Archaea	p__	c__	o__	f__	g__	s__	0	0	0	0	0	0	0	0	0	0	0	0	0	0	0	0	0	0	0	0	0	0	0	0	0	0	0	4	0	0	0	0	0	0	0	0	0	0	0	0
OTU_2057	k__Bacteria	p__Firmicutes	c__Clostridia	o__Clostridiales	f__Ruminococcaceae	g__Ruminiclostridium	s__[Clostridium]_leptum	0	0	0	0	0	0	0	0	0	0	0	0	0	0	0	0	0	0	0	0	0	0	0	0	0	0	0	0	0	0	0	0	0	0	0	4	0	0	0	0
OTU_2058	k__Bacteria	p__Firmicutes	c__Clostridia	o__Clostridiales	f__Ruminococcaceae	Others	Others	0	0	1	0	0	0	0	0	0	0	5	0	0	0	0	0	0	2	0	0	0	0	1	0	0	0	0	1	0	0	0	0	0	0	0	0	0	0	1	0
OTU_2059	k__Bacteria	p__Firmicutes	c__Clostridia	Others	Others	Others	Others	0	0	0	0	0	2	0	0	0	0	0	0	0	0	0	0	0	0	0	0	0	0	0	0	0	0	0	0	0	0	0	0	0	0	0	0	0	0	0	0
OTU_2061	k__Bacteria	p__Proteobacteria	c__Deltaproteobacteria	o__Desulfovibrionales	f__Desulfovibrionaceae	g__Desulfovibrio	s__Desulfovibrio_vulgaris	0	0	0	0	0	1	0	0	0	0	0	0	0	0	0	0	0	0	0	0	0	0	0	0	0	0	0	0	0	0	0	0	0	0	0	0	0	0	0	0
OTU_2064	k__Bacteria	p__Firmicutes	c__Clostridia	o__Clostridiales	f__Lachnospiraceae	Others	Others	0	0	0	0	0	0	0	0	0	0	0	0	0	0	0	0	0	0	0	0	0	0	0	0	0	0	1	0	0	0	0	0	0	0	0	54	0	0	0	0
OTU_2065	k__Bacteria	p__Firmicutes	c__Clostridia	o__Clostridiales	f__Ruminococcaceae	g__Butyricicoccus	s__	4	6	7	0	12	1	8	5	0	0	2	0	38	0	4	94	10	3	0	0	2	4	0	4	1	3	3	8	10	6	0	7	47	15	9	20	3	4	0	3
OTU_2066	k__Bacteria	p__Firmicutes	c__Clostridia	o__Clostridiales	f__Ruminococcaceae	Others	Others	1	0	0	0	1	0	0	0	0	77	30	1	0	0	3	34	7	1	0	33	21	0	0	0	381	0	0	0	0	0	0	0	14	0	142	3	0	8	26	0
OTU_2067	k__Bacteria	p__Actinobacteria	c__Thermoleophilia	o__Solirubrobacterales	Others	Others	Others	0	2	0	0	0	0	0	0	0	0	0	0	0	0	0	0	0	0	0	0	0	0	0	0	0	0	0	0	0	0	0	0	0	0	0	0	0	0	0	0
OTU_2071	k__Bacteria	p__Firmicutes	c__Limnochordia	o__Limnochordales	f__Limnochordaceae	g__	s__	0	4	0	0	0	0	0	0	0	0	0	0	0	0	0	0	0	0	0	0	0	0	0	0	0	0	0	0	0	0	0	0	0	0	0	0	0	0	0	0
OTU_2073	k__Bacteria	p__Tenericutes	c__Mollicutes	o__	f__	g__	s__	9	0	0	0	0	4	0	0	0	0	0	0	4	0	0	38	0	0	9	0	0	0	0	0	0	0	0	0	0	0	0	0	0	0	0	0	0	7	0	0
OTU_2074	k__Bacteria	p__Firmicutes	c__Clostridia	o__Clostridiales	f__Lachnospiraceae	g__unidentified_Lachnospiraceae	s__Clostridiales_bacterium_CIEAF_020	3	0	1	7	3	5	29	0	0	6	0	3	0	4	0	0	5	0	0	0	0	2	8	70	0	0	2	0	7	0	178	1	0	2	0	0	7	18	0	0
OTU_2076	k__Bacteria	p__Firmicutes	c__Clostridia	o__Clostridiales	f__Lachnospiraceae	g__unidentified_Lachnospiraceae	Others	8	6	0	13	0	3	2	2	0	0	4	12	6	6	4	0	5	0	0	0	0	5	0	3	13	0	0	0	3	0	0	1	2	7	8	3	0	6	0	4
OTU_2077	k__Bacteria	p__Bacteroidetes	c__Bacteroidia	o__Bacteroidales	f__Bacteroidaceae	g__Bacteroides	Others	0	0	0	0	0	0	0	0	0	0	0	0	0	0	1	0	0	0	0	0	0	0	0	0	0	0	0	0	0	0	0	0	0	0	0	0	0	0	0	0
OTU_2078	k__Bacteria	p__Firmicutes	c__Clostridia	o__Clostridiales	f__Lachnospiraceae	Others	Others	0	6	2	0	23	45	6	0	0	0	0	2	0	1	183	0	73	2	0	1	6	0	0	0	0	0	0	0	2	0	1	0	0	2	9	0	0	0	0	0
OTU_2079	k__Bacteria	p__unidentified_Bacteria	c__unidentified_Bacteria	o__Campylobacterales	f__Helicobacteraceae	g__Helicobacter	Others	1	0	29	5	0	2	5	2	0	0	6	24	0	0	24	2	10	0	0	0	6	0	33	3	1	5	0	8	0	2	0	4	23	2	0	2	6	6	1	14
OTU_2080	k__Bacteria	p__Firmicutes	c__Clostridia	o__Clostridiales	f__Lachnospiraceae	Others	Others	0	0	0	1	0	2	0	0	0	0	0	0	1	0	0	0	0	5	0	4	0	0	4	0	0	0	0	0	0	5	0	0	0	0	0	0	0	0	7	0
OTU_2081	k__Bacteria	p__Firmicutes	c__Clostridia	o__Clostridiales	f__Ruminococcaceae	Others	Others	0	1	0	0	0	3	68	0	14	0	2	27	1	42	2	0	8	199	0	1	2	4	0	42	0	4	3	0	0	0	17	0	0	0	14	0	0	8	0	0
OTU_2082	k__Bacteria	p__Gemmatimonadetes	c__Longimicrobia	o__Longimicrobiales	f__Longimicrobiaceae	g__	s__	0	9	0	0	0	0	0	0	0	0	0	0	0	0	0	0	0	0	0	0	0	0	0	0	0	0	0	0	0	0	0	0	2	0	0	0	0	0	0	0
OTU_2083	k__Bacteria	Others	Others	Others	Others	Others	Others	0	1	0	0	0	0	0	0	0	0	0	0	0	0	0	0	0	0	0	0	0	0	0	0	0	0	0	0	0	0	0	0	0	0	0	0	0	0	0	0
OTU_2084	k__Bacteria	p__Firmicutes	c__Clostridia	o__Clostridiales	f__Lachnospiraceae	Others	Others	0	0	0	0	2	18	26	4	17	1	14	0	72	103	0	0	9	12	4	6	3	0	0	56	0	4	6	6	1	0	0	0	6	17	29	3	0	4	9	2
OTU_2085	k__Bacteria	Others	Others	Others	Others	Others	Others	0	1	0	0	0	0	0	0	0	0	0	0	0	0	0	0	0	0	0	0	0	0	0	0	0	0	0	0	0	0	0	0	0	0	0	0	0	0	0	0
OTU_2086	k__Bacteria	p__Firmicutes	c__Clostridia	o__Clostridiales	f__Lachnospiraceae	Others	Others	0	0	0	0	10	6	9	2	1	2	0	0	0	0	28	15	3	6	0	0	0	0	0	15	0	5	0	4	3	6	0	14	0	0	1	0	0	0	0	0
OTU_2087	k__Bacteria	p__Candidatus_Peregrinibacteria	c__	o__	f__	g__	s__	0	0	0	0	0	6	0	0	0	0	0	0	0	0	0	0	0	0	0	0	0	0	0	0	0	0	0	0	0	0	0	0	0	0	0	0	0	0	0	0
OTU_2088	k__Bacteria	p__Firmicutes	c__Clostridia	o__Clostridiales	f__Lachnospiraceae	Others	Others	0	0	0	0	0	0	0	2	0	0	3	0	0	0	0	5	0	0	0	0	0	0	0	0	1	0	0	0	0	0	0	0	2	1	32	0	0	3	0	1
OTU_2089	k__Bacteria	p__Firmicutes	c__Clostridia	o__Clostridiales	f__Ruminococcaceae	g__unidentified_Ruminococcaceae	s__Clostridium_sp_Culture_Jar-13	0	0	0	0	0	0	0	1	1	0	2	6	9	11	6	7	1	1	2	12	0	0	2	7	1	3	0	0	0	3	4	0	2	2	20	6	0	0	8	0
OTU_2090	k__Bacteria	p__Firmicutes	c__Clostridia	o__Clostridiales	f__Ruminococcaceae	g__unidentified_Ruminococcaceae	Others	0	0	0	0	0	0	0	0	0	2	0	0	10	0	0	0	0	0	6	2	0	0	6	2	0	0	1	0	0	0	3	0	0	0	0	7	0	0	0	0
OTU_2092	k__Bacteria	p__Bacteroidetes	c__Bacteroidia	o__Bacteroidales	f__Muribaculaceae	g__	s__	0	0	0	0	0	0	0	0	0	0	0	0	0	0	0	1	0	0	0	4	0	0	0	0	0	0	0	0	0	0	0	0	0	0	0	0	0	0	10	0
OTU_2094	k__Bacteria	p__Armatimonadetes	c__	o__	f__	g__	s__	0	0	0	0	0	4	0	0	0	0	0	0	0	0	0	0	0	0	0	0	0	0	0	0	0	0	0	0	0	0	0	0	0	0	0	0	0	0	0	0
OTU_2095	k__Bacteria	p__Firmicutes	c__Clostridia	o__Clostridiales	f__Lachnospiraceae	Others	Others	0	0	0	0	0	0	0	0	0	0	0	0	0	0	0	0	0	0	0	0	0	0	0	0	0	0	0	0	0	0	0	0	0	0	10	0	0	0	0	0
OTU_2096	k__Bacteria	Others	Others	Others	Others	Others	Others	0	0	0	0	0	0	0	1	0	0	0	0	0	0	0	0	0	0	0	0	0	0	0	0	0	0	0	0	0	0	0	0	0	0	0	0	0	0	0	0
OTU_2097	k__Bacteria	p__Firmicutes	c__Clostridia	o__Clostridiales	f__Ruminococcaceae	g__Angelakisella	s__	0	0	0	0	0	0	0	0	0	0	0	0	0	0	0	0	0	0	0	0	0	0	0	0	0	0	0	0	3	0	0	0	0	0	0	0	0	0	0	0
OTU_2098	k__Bacteria	p__unidentified_Bacteria	c__unidentified_Bacteria	o__unidentified_Bacteria	f__unidentified_Bacteria	g__Candidatus_Entotheonella	s__	0	0	0	0	0	0	0	0	0	0	0	0	0	0	0	0	0	0	4	0	0	0	0	0	0	0	0	0	0	0	0	0	0	0	0	0	0	0	0	0
OTU_2099	k__Bacteria	p__Firmicutes	c__Clostridia	o__Clostridiales	f__Ruminococcaceae	g__	s__	0	0	0	0	0	0	0	3	0	0	0	0	0	0	0	0	1	0	0	0	0	0	0	0	0	0	0	0	9	0	0	0	0	0	0	0	0	0	0	0
OTU_2100	k__Bacteria	p__Proteobacteria	c__Deltaproteobacteria	o__Bdellovibrionales	f__Bdellovibrionaceae	g__Bdellovibrio	s__	0	0	0	0	0	0	0	2	0	0	0	0	0	0	0	0	0	0	0	0	0	0	0	0	0	0	0	0	0	0	0	0	0	0	0	0	0	0	0	0
OTU_2101	k__Bacteria	p__Firmicutes	c__Clostridia	o__	f__	g__	s__	0	0	0	0	0	6	0	0	0	0	0	0	0	0	0	0	0	0	0	0	0	0	0	0	0	0	0	0	0	0	0	0	0	0	0	0	0	0	0	0
OTU_2102	k__Bacteria	p__Firmicutes	c__Clostridia	o__Clostridiales	f__Lachnospiraceae	Others	Others	0	0	0	0	2	4	0	0	22	6	0	1	0	0	0	1	7	2	20	0	2	0	0	0	0	10	5	2	0	15	0	9	0	0	0	0	0	0	0	1
OTU_2103	k__Archaea	p__Crenarchaeota	c__	o__	f__	g__	s__	0	0	0	0	0	2	0	0	0	0	0	0	0	0	0	0	0	0	0	0	0	0	0	0	0	0	0	0	0	0	0	0	0	0	0	0	0	0	0	0
OTU_2105	k__Bacteria	p__Actinobacteria	c__unidentified_Actinobacteria	o__Micrococcales	f__Microbacteriaceae	g__Agrococcus	Others	0	0	0	0	0	0	0	0	0	0	0	0	0	0	0	0	0	0	0	0	0	0	0	0	0	0	0	0	0	0	0	0	8	0	0	0	0	0	0	0
OTU_2106	k__Bacteria	p__Firmicutes	c__Bacilli	o__Lactobacillales	f__Lactobacillaceae	g__Lactobacillus	Others	0	0	2	0	0	0	0	6	2	1	2	6	2	8	0	5	0	1	3	0	0	0	4	0	2	3	5228	4	2	10	2	18	0	4	0	0	2	5	0	3
OTU_2109	k__Bacteria	p__Firmicutes	c__Bacilli	o__Lactobacillales	f__Lactobacillaceae	g__Lactobacillus	Others	0	0	0	0	0	0	0	0	0	3	0	0	2	3	0	0	0	0	0	0	0	0	0	0	1	7	0	0	0	0	0	0	0	0	0	0	0	0	0	0
OTU_2110	k__Bacteria	p__Bacteroidetes	c__Bacteroidia	o__Bacteroidales	f__Muribaculaceae	g__	s__	0	0	2	0	0	0	0	3	0	0	0	0	0	0	0	1	0	0	0	0	0	0	3	0	0	0	0	3	0	0	0	0	0	0	0	0	0	0	0	0
OTU_2111	k__Bacteria	p__Firmicutes	c__Clostridia	o__Clostridiales	f__Lachnospiraceae	Others	Others	0	0	0	0	0	0	0	4	0	2	0	0	70	2	1	0	4	0	0	1	0	0	0	0	18	0	2	7	1	1	37	1	0	7	2	1	0	3	3	0
OTU_2112	k__Bacteria	p__Firmicutes	c__Clostridia	o__Clostridiales	f__Ruminococcaceae	Others	Others	0	0	0	0	0	0	0	0	0	0	0	0	0	0	0	0	0	0	0	0	0	0	0	0	0	0	0	0	4	0	0	0	0	0	0	0	0	0	0	0
OTU_2113	k__Bacteria	p__Firmicutes	c__Clostridia	o__Clostridiales	Others	Others	Others	0	0	3	0	3	8	2	3	2	0	1	1	4	9	0	13	1	0	17	0	0	4	4	16	3	2	0	1	5	25	2	0	0	0	3	2	2	5	1	3
OTU_2114	k__Bacteria	p__Firmicutes	c__Clostridia	o__Clostridiales	f__Lachnospiraceae	Others	Others	0	0	0	0	0	0	0	0	0	0	0	0	1	0	0	0	0	0	0	0	0	0	0	0	0	0	0	0	0	0	0	0	0	0	0	0	0	0	0	0
OTU_2116	k__Bacteria	p__Firmicutes	c__Clostridia	o__Clostridiales	f__Lachnospiraceae	g__unidentified_Lachnospiraceae	s__Clostridiales_bacterium_CIEAF_020	0	0	0	0	0	0	0	0	0	1	0	0	0	1	0	0	0	0	0	0	0	3	0	2	0	0	0	0	0	2	10	0	0	0	0	0	2	9	0	0
OTU_2121	k__Bacteria	p__Bacteroidetes	c__Bacteroidia	o__Bacteroidales	f__Muribaculaceae	g__	s__	1	6	0	0	0	4	0	3	0	0	0	0	0	0	0	0	0	4	26	1	0	0	0	2	3	0	1	0	0	0	0	1	0	0	1	15	4	0	0	0
OTU_2122	k__Bacteria	p__Firmicutes	c__Clostridia	o__Clostridiales	f__Ruminococcaceae	Others	Others	0	0	0	0	0	0	0	0	0	4	2	6	100	6	0	5	2	0	0	0	0	2	19	2	0	54	0	0	0	0	0	0	0	0	0	0	2	0	0	0
OTU_2123	k__Bacteria	p__Bacteroidetes	c__Bacteroidia	o__Bacteroidales	f__Muribaculaceae	g__	s__	0	15	0	0	0	0	0	0	0	0	0	0	0	0	0	0	0	0	8	0	0	0	0	0	0	0	2	0	0	0	0	0	0	2	0	64	1	0	4	0
OTU_2124	k__Bacteria	p__Firmicutes	c__Clostridia	o__Clostridiales	f__Ruminococcaceae	g__Butyricicoccus	Others	0	0	0	0	0	2	0	0	0	0	3	0	7	6	0	0	0	0	0	0	0	0	0	0	9	0	0	0	0	0	0	0	0	0	0	0	0	0	0	0
OTU_2125	k__Bacteria	p__Planctomycetes	c__Planctomycetacia	o__unidentified_Planctomycetacia	f__Gemmataceae	g__	s__	0	0	0	0	0	0	0	0	0	0	0	0	0	0	0	0	0	0	0	0	0	0	1	0	0	0	0	0	0	0	0	0	0	0	0	0	0	0	0	0
OTU_2126	k__Bacteria	Others	Others	Others	Others	Others	Others	0	0	0	0	0	0	0	0	0	0	0	0	0	0	0	0	0	0	0	0	0	0	0	0	0	0	0	1	0	0	0	0	0	0	0	0	0	0	0	0
OTU_2127	k__Bacteria	p__Firmicutes	c__Clostridia	o__Clostridiales	f__Lachnospiraceae	g__unidentified_Lachnospiraceae	Others	0	0	0	0	0	0	0	0	0	0	0	0	0	0	3	0	0	0	0	0	2	0	0	0	0	0	40	0	102	1	0	0	0	0	0	284	0	0	0	0
OTU_2128	k__Bacteria	p__Firmicutes	c__Clostridia	o__Clostridiales	f__Lachnospiraceae	g__Lachnoclostridium	Others	18	47	21	116	20	23	167	19	14	31	43	21	81	32	99	122	42	16	9	11	26	146	128	34	55	14	9	149	68	13	13	154	36	40	73	20	27	134	10	51
OTU_2129	k__Bacteria	p__Firmicutes	c__Clostridia	o__Clostridiales	f__Lachnospiraceae	g__unidentified_Lachnospiraceae	s__Lachnospiraceae_bacterium_M18-1	0	1	0	0	0	0	0	0	0	0	2	0	0	0	0	0	0	0	0	0	0	0	0	0	0	0	0	0	0	0	0	0	0	0	0	0	0	0	0	0
OTU_2130	k__Bacteria	p__Firmicutes	c__Clostridia	o__Clostridiales	f__Ruminococcaceae	g__unidentified_Ruminococcaceae	Others	0	0	0	0	0	0	0	0	0	0	0	0	0	0	0	0	1	0	0	0	0	0	0	0	0	0	0	0	0	0	0	0	0	0	0	0	0	0	0	0
OTU_2131	k__Bacteria	p__Tenericutes	c__Mollicutes	o__	f__	g__	s__	0	0	0	0	0	0	0	2	0	2	4	0	0	0	8	0	0	0	24	0	0	7	0	0	1	2	0	2	7	0	0	0	0	0	0	0	0	0	0	0
OTU_2132	k__Bacteria	p__Chloroflexi	c__Anaerolineae	o__Anaerolineales	f__Anaerolineaceae	g__	s__	0	0	0	0	0	0	0	0	0	0	0	0	0	0	0	0	0	0	0	0	0	0	0	0	0	0	0	2	0	0	0	0	0	0	0	0	0	0	0	0
OTU_2133	k__Bacteria	p__Firmicutes	c__Clostridia	o__Clostridiales	f__unidentified_Clostridiales	g__unidentified_Clostridiales	Others	0	0	0	0	0	0	12	0	0	0	0	0	0	0	8	0	0	0	0	0	0	0	9	0	0	0	0	0	0	0	0	0	0	0	0	0	0	0	0	0
OTU_2134	k__Bacteria	p__Firmicutes	c__Clostridia	o__Clostridiales	f__Ruminococcaceae	g__unidentified_Ruminococcaceae	s__Ruminococcus_flavefaciens	0	0	0	0	0	0	0	0	0	3	0	0	0	0	0	206	6	0	0	0	0	4	0	0	47	0	0	9	0	0	0	0	9	0	0	7	0	0	0	0
OTU_2135	k__Bacteria	p__Zixibacteria	c__	o__	f__	g__	s__	0	0	0	0	0	0	0	0	0	0	0	0	0	0	0	0	0	0	0	0	0	0	0	0	0	0	0	0	0	0	0	0	0	0	0	0	0	0	0	0
OTU_2137	k__Bacteria	p__Firmicutes	c__Clostridia	o__Clostridiales	f__Lachnospiraceae	Others	Others	49	4	8	49	1	9	13	3	0	1	2	20	105	22	18	44	34	1	1	10	0	0	2	6	108	5	4	21	7	0	2	9	48	22	66	22	1	2	23	4
OTU_2138	k__Bacteria	p__Actinobacteria	c__unidentified_Actinobacteria	o__Streptosporangiales	f__Nocardiopsaceae	g__Nocardiopsis	Others	0	0	0	0	0	0	0	0	0	0	0	0	0	0	0	0	0	0	0	0	0	0	0	0	0	0	0	0	0	0	0	2	0	0	0	0	0	0	0	0
OTU_2139	k__Bacteria	p__Firmicutes	c__Clostridia	o__Clostridiales	f__Ruminococcaceae	Others	Others	9	0	0	2	0	0	0	10	0	0	2	0	0	1	1	0	3	1	11	0	1	0	0	5	1	0	2	0	2	3	18	7	17	0	1	4	0	13	0	29
OTU_2140	k__Bacteria	p__Firmicutes	c__Clostridia	o__Clostridiales	f__Ruminococcaceae	g__Faecalibacterium	Others	0	12	1	0	0	0	0	10	0	0	0	0	0	4	0	0	0	0	3	0	0	0	5	0	0	2	2	0	54	0	0	0	30	0	0	0	0	0	0	0
OTU_2141	k__Bacteria	p__Firmicutes	c__Bacilli	o__Lactobacillales	f__Lactobacillaceae	g__Lactobacillus	Others	1	22	6	0	9	17	1	14	19	31	53	34	308	39	2	65	38	3	121	23	7	46	3	0	154	48	20	12	69	471	21	60	13	7	0	30	27	18	26	60
OTU_2142	k__Bacteria	p__Firmicutes	c__Erysipelotrichia	o__Erysipelotrichales	f__Erysipelotrichaceae	g__Dubosiella	Others	3	0	1	0	4	3	2	3	0	0	0	2	0	3	0	2	2	0	2	0	0	0	2	2	0	1	0	4	0	0	0	0	0	1	0	0	0	0	0	0
OTU_2144	k__Bacteria	p__Firmicutes	c__Clostridia	o__Clostridiales	f__Lachnospiraceae	Others	Others	0	0	0	0	0	0	2	0	0	0	1	0	5	0	3	0	0	2	0	0	0	0	2	1	0	4	0	1	2	0	1	0	0	0	5	7	0	0	0	0
OTU_2145	k__Bacteria	p__Firmicutes	c__Clostridia	o__Clostridiales	f__Ruminococcaceae	Others	Others	0	0	0	3	0	14	2	0	1	32	0	2	45	24	0	19	12	0	0	0	0	7	1	0	0	0	3	22	153	0	0	0	0	0	0	0	0	0	0	2
OTU_2146	k__Bacteria	p__Firmicutes	c__Clostridia	o__Clostridiales	f__Lachnospiraceae	Others	Others	0	0	0	0	0	0	0	0	0	0	0	0	0	0	0	1	0	0	0	0	0	0	0	0	0	0	1	0	0	3	0	0	0	0	0	5	0	0	0	8
OTU_2147	k__Bacteria	p__Firmicutes	c__Clostridia	o__Clostridiales	f__Lachnospiraceae	Others	Others	0	3	0	0	3	0	0	0	0	0	0	0	2	0	0	1	21	0	3	0	0	0	0	0	0	0	0	3	26	25	1	0	0	0	0	3	23	0	0	6
OTU_2148	k__Bacteria	p__Firmicutes	c__Clostridia	o__Clostridiales	f__Lachnospiraceae	Others	Others	0	0	0	0	0	0	8	0	0	0	0	0	0	6	1	0	0	2	0	0	0	0	0	1	0	0	0	0	0	0	0	0	0	0	0	0	0	0	0	0
OTU_2149	k__Bacteria	p__Verrucomicrobia	c__Verrucomicrobiae	o__unidentified_Verrucomicrobiae	f__unidentified_Verrucomicrobiae	g__unidentified_Verrucomicrobiae	s__Verrucomicrobia_bacterium_ADurbBin063	0	0	0	0	0	1	0	0	0	5	0	0	0	0	0	0	0	0	0	0	0	0	0	0	0	0	0	0	0	0	0	0	0	0	0	0	0	0	0	0
OTU_2150	k__Bacteria	p__Firmicutes	c__Clostridia	o__Clostridiales	f__Lachnospiraceae	g__	s__	0	0	0	0	0	0	0	0	0	0	0	0	0	3	0	0	0	0	0	0	0	0	0	1	0	0	0	0	14	0	0	0	0	0	1	0	0	0	0	0
OTU_2151	k__Bacteria	p__Proteobacteria	c__Deltaproteobacteria	o__Desulfuromonadales	f__Geobacteraceae	g__Geobacter	s__	0	0	0	0	0	0	0	3	0	0	0	0	0	0	0	0	0	0	0	0	0	0	0	0	0	0	0	0	0	0	0	0	3	0	0	0	0	0	0	0
OTU_2152	k__Bacteria	p__Bacteroidetes	c__Bacteroidia	o__Bacteroidales	f__Muribaculaceae	Others	Others	0	0	0	0	0	0	0	3	0	0	0	0	0	0	0	0	0	0	0	0	0	0	0	0	0	0	0	0	1	0	0	0	0	0	0	0	1	0	0	0
OTU_2153	k__Bacteria	p__Proteobacteria	c__Deltaproteobacteria	o__Myxococcales	f__Polyangiaceae	g__Pajaroellobacter	s__	0	0	0	0	0	0	0	0	0	0	0	2	0	0	0	0	0	0	0	0	0	0	0	0	0	0	0	0	0	0	0	0	0	0	0	0	0	0	0	0
OTU_2154	k__Bacteria	p__Bacteroidetes	c__Bacteroidia	o__Bacteroidales	f__Muribaculaceae	g__	s__	0	0	0	0	0	0	0	0	0	0	0	0	0	0	0	0	4	0	0	0	0	0	0	0	0	0	0	0	0	0	0	0	0	0	0	0	0	0	0	0
OTU_2157	k__Bacteria	p__unidentified_Bacteria	c__unidentified_Bacteria	o__unidentified_Bacteria	f__unidentified_Bacteria	g__Candidatus_Saccharimonas	s__	0	0	0	0	0	0	0	0	0	0	0	0	0	0	0	0	0	0	0	0	0	0	0	0	0	0	0	0	1	0	0	0	0	0	0	0	0	0	0	0
OTU_2160	k__Bacteria	p__Chloroflexi	c__Anaerolineae	o__	f__	g__	s__	0	0	0	0	0	0	0	0	0	0	0	0	0	0	0	0	0	0	0	0	0	0	0	0	0	0	0	0	0	0	0	0	0	0	0	0	0	0	0	0
OTU_2161	k__Bacteria	p__Firmicutes	c__Clostridia	o__Clostridiales	f__Ruminococcaceae	Others	Others	0	0	0	0	0	0	0	0	0	0	0	0	0	0	0	0	0	0	0	0	0	0	0	0	0	0	0	0	0	0	0	0	0	0	1	4	0	0	0	0
OTU_2162	k__Bacteria	p__Bacteroidetes	c__Bacteroidia	o__Bacteroidales	f__Tannerellaceae	Others	Others	0	0	0	0	0	3	0	0	0	0	0	0	0	0	0	0	0	0	0	0	0	0	0	0	0	0	0	0	0	0	0	0	0	0	0	0	0	0	0	0
OTU_2163	k__Bacteria	p__Firmicutes	c__Clostridia	o__Clostridiales	f__Lachnospiraceae	g__Roseburia	Others	0	0	0	0	0	0	0	0	18	0	0	0	17	0	0	0	0	0	0	0	0	0	0	0	0	0	0	0	0	0	0	0	0	0	0	0	0	0	0	0
OTU_2164	k__Bacteria	p__Bacteroidetes	c__Bacteroidia	o__Bacteroidales	f__Muribaculaceae	g__	s__	66	10	13	7	0	0	6	1	2	3	10	1	8	0	4	29	6	2	7	1	6	3	9	4	74	3	1	15	23	2	0	3	14	1	13	33	9	2	12	6
OTU_2169	k__Bacteria	Others	Others	Others	Others	Others	Others	0	0	0	0	0	7	0	0	0	0	0	0	0	0	0	0	0	0	0	0	0	0	0	0	0	0	0	0	0	0	0	0	0	0	0	0	0	0	0	0
OTU_2170	k__Bacteria	p__Proteobacteria	c__Gammaproteobacteria	o__Xanthomonadales	f__Rhodanobacteraceae	g__Mizugakiibacter	s__	0	5	0	0	0	0	0	0	0	0	0	0	0	0	0	0	0	0	0	0	0	0	0	0	0	0	0	0	0	0	0	0	0	0	0	0	0	0	0	0
OTU_2171	k__Bacteria	p__Chloroflexi	c__Dehalococcoidia	o__unidentified_Dehalococcoidia	f__unidentified_Dehalococcoidia	g__unidentified_Dehalococcoidia	s__bacterium_YC-LK-LKJ27	0	2	0	0	0	0	0	0	0	0	0	0	0	0	0	0	0	0	0	0	0	0	0	0	0	0	0	0	0	0	0	0	0	0	0	0	0	0	0	0
OTU_2172	k__Bacteria	p__Firmicutes	c__Bacilli	o__Lactobacillales	f__Lactobacillaceae	g__Lactobacillus	Others	0	0	0	0	0	0	0	0	0	0	0	0	0	0	0	0	0	0	0	0	2	0	0	0	0	0	1	0	0	0	0	0	0	0	0	0	0	0	3	0
OTU_2173	k__Bacteria	p__Planctomycetes	c__Planctomycetacia	o__Planctomycetales	Others	Others	Others	0	1	0	0	0	0	0	0	0	0	0	0	0	0	0	0	0	0	0	0	0	0	0	0	0	0	0	0	0	0	0	0	0	0	0	0	0	0	0	0
OTU_2174	k__Bacteria	p__Firmicutes	c__Clostridia	o__Clostridiales	Others	Others	Others	11	1	7	6	3	4	3	3	0	0	11	7	5	3	8	10	6	0	5	0	5	4	4	2	3	2	0	22	10	0	0	2	19	5	7	0	0	4	0	7
OTU_2175	k__Bacteria	Others	Others	Others	Others	Others	Others	0	0	0	0	0	3	0	0	0	0	0	0	0	0	0	0	0	0	0	0	0	0	0	0	0	0	0	0	0	0	0	0	0	0	0	0	0	0	0	0
OTU_2178	k__Bacteria	p__Firmicutes	c__Erysipelotrichia	o__Erysipelotrichales	f__Erysipelotrichaceae	g__Dubosiella	s__	0	0	0	0	12	4	0	6	31	18	10	13	0	3	1	0	3	0	6	5	3	3	2	5	0	15	10	0	0	2	30	2	2	10	4	12	2	1	6	5
OTU_2179	k__Bacteria	p__Actinobacteria	Others	Others	Others	Others	Others	0	0	0	0	0	2	0	0	0	0	0	0	0	0	0	0	0	0	0	0	0	0	0	0	0	0	0	0	0	0	0	0	0	0	0	0	0	0	0	0
OTU_2180	k__Bacteria	p__Firmicutes	c__Clostridia	o__Clostridiales	f__Lachnospiraceae	Others	Others	0	1	0	0	4	1	0	4	0	2	1	0	0	0	0	0	0	0	0	0	0	0	0	0	0	0	3	0	0	0	0	5	0	4	0	1	0	0	0	0
OTU_2181	k__Bacteria	p__Firmicutes	c__Clostridia	o__Clostridiales	f__Lachnospiraceae	Others	Others	0	0	0	0	0	0	2	0	0	0	0	0	0	0	8	0	0	0	0	0	0	0	0	0	0	0	0	0	0	0	0	0	0	0	0	0	0	0	0	0
OTU_2182	k__Bacteria	p__Proteobacteria	c__Deltaproteobacteria	o__unidentified_Deltaproteobacteria	f__Syntrophorhabdaceae	g__Syntrophorhabdus	s__	0	0	0	0	0	0	0	0	0	0	0	0	0	0	0	0	0	0	0	0	0	0	0	0	0	0	0	0	0	0	0	0	0	0	0	0	0	0	0	0
OTU_2183	k__Bacteria	p__Firmicutes	c__Clostridia	o__Clostridiales	f__unidentified_Clostridiales	Others	Others	0	0	0	0	0	2	0	0	0	0	0	0	0	0	0	0	0	0	0	0	0	0	0	0	0	0	0	0	0	0	0	0	0	0	0	0	0	0	0	0
OTU_2184	k__Bacteria	p__Firmicutes	c__Clostridia	o__Clostridiales	f__Ruminococcaceae	Others	Others	0	0	0	0	0	0	0	0	0	0	0	0	0	0	0	0	0	0	0	0	0	0	0	0	0	0	0	0	0	1	0	0	0	0	0	0	0	0	0	0
OTU_2186	k__Bacteria	p__Firmicutes	c__Clostridia	o__Clostridiales	f__Lachnospiraceae	Others	Others	6	0	0	0	0	0	1	2	0	0	4	0	2	0	2	19	4	0	1	0	1	0	3	0	5	3	0	1	0	0	0	14	0	0	0	0	0	0	0	0
OTU_2187	k__Bacteria	p__Firmicutes	c__Erysipelotrichia	o__Erysipelotrichales	f__Erysipelotrichaceae	g__Dubosiella	s__	0	0	0	0	0	3	2	0	3	2	0	0	0	0	2	0	0	0	2	0	0	0	0	0	0	7	0	0	0	0	1	0	0	6	0	0	0	0	0	0
OTU_2189	k__Bacteria	p__Firmicutes	c__Bacilli	o__Lactobacillales	f__Lactobacillaceae	g__Lactobacillus	Others	0	0	2	0	0	0	0	0	3	2	4	2	26	3	0	4	0	0	14	2	0	0	0	0	6	3	6	0	4	113	1	10	1	0	0	0	1	3	2	6
OTU_2190	k__Bacteria	p__Firmicutes	c__Clostridia	o__Clostridiales	f__Lachnospiraceae	Others	Others	2	0	0	0	0	0	0	0	0	2	0	0	2	0	0	0	1	0	0	0	0	0	0	0	0	0	0	0	0	0	0	1	0	0	0	1	0	0	1	0
OTU_2191	k__Bacteria	p__Bacteroidetes	c__Bacteroidia	o__Chitinophagales	f__Saprospiraceae	g__Candidatus_Aquirestis	s__	0	0	0	0	0	0	0	0	0	0	0	0	0	0	0	0	0	0	0	0	0	0	0	0	0	0	0	0	0	0	0	0	1	0	0	0	0	0	0	0
OTU_2194	k__Bacteria	p__Bacteroidetes	c__Bacteroidia	o__Bacteroidales	f__Rikenellaceae	g__Alistipes	Others	0	1	0	0	0	0	0	0	0	0	0	0	0	0	0	0	0	0	0	0	0	0	3	0	0	0	0	0	2	0	0	0	0	0	0	0	0	0	0	0
OTU_2195	k__Bacteria	p__Actinobacteria	c__unidentified_Actinobacteria	o__Frankiales	f__Frankiaceae	g__Frankia	Others	0	0	0	0	0	0	0	2	0	0	0	0	0	0	0	0	0	0	0	0	0	0	0	0	0	0	0	0	0	0	0	0	0	0	0	0	0	0	0	0
OTU_2197	k__Bacteria	p__Planctomycetes	c__	o__	f__	g__	s__	0	0	0	0	0	4	0	0	0	0	0	0	0	0	0	0	0	0	0	0	0	0	0	0	0	0	0	0	0	0	0	0	0	0	0	0	0	0	0	0
OTU_2200	k__Bacteria	p__Firmicutes	c__Clostridia	o__Clostridiales	f__Ruminococcaceae	Others	Others	0	0	0	0	0	0	0	0	0	0	0	0	1	0	0	2	1	1	2	0	0	0	0	0	0	0	0	0	4	0	0	0	0	0	0	0	0	0	0	0
OTU_2201	k__Bacteria	p__Firmicutes	c__Clostridia	o__Clostridiales	f__Lachnospiraceae	Others	Others	0	0	0	0	0	0	0	0	0	0	0	0	0	0	0	0	0	0	0	0	0	0	0	0	1	0	0	0	0	0	0	2	0	0	0	1	0	0	0	0
OTU_2202	k__Bacteria	p__Firmicutes	c__Erysipelotrichia	o__Erysipelotrichales	f__Erysipelotrichaceae	g__Faecalibaculum	s__	10	7	20	22	9	4	12	4	83	90	89	59	0	7	4	73	388	1	30	111	15	96	54	5	0	58	73	24	7	428	101	187	9	16	10	3	131	303	56	5
OTU_2203	k__Bacteria	p__Firmicutes	c__Erysipelotrichia	o__Erysipelotrichales	f__Erysipelotrichaceae	g__Erysipelatoclostridium	s__[Clostridium]_spiroforme	0	0	0	0	0	0	0	0	0	0	1	0	0	0	0	0	0	0	0	0	0	0	0	0	0	0	0	0	0	0	0	0	0	0	0	0	0	0	0	0
OTU_2204	k__Bacteria	p__Firmicutes	c__Clostridia	o__Clostridiales	f__Ruminococcaceae	g__unidentified_Ruminococcaceae	Others	0	0	0	0	0	0	0	2	0	5	2	0	3	0	0	0	2	0	0	0	0	0	0	1	0	0	0	0	0	0	0	0	0	3	0	0	0	0	2	0
OTU_2205	k__Bacteria	p__Bacteroidetes	c__Bacteroidia	o__Bacteroidales	f__Muribaculaceae	g__	s__	0	0	0	0	0	0	0	0	0	0	0	0	0	0	0	0	0	0	0	0	0	0	0	0	0	0	0	0	0	0	0	0	0	0	0	133	0	0	0	0
OTU_2206	k__Bacteria	p__Proteobacteria	c__Alphaproteobacteria	o__unidentified_Alphaproteobacteria	f__unidentified_Alphaproteobacteria	g__Zavarzinia	s__	0	4	0	0	0	0	0	2	0	0	0	0	0	0	0	3	0	0	2	0	0	0	0	0	0	0	0	3	2	0	2	1	0	0	2	0	0	0	0	4
OTU_2207	k__Bacteria	p__Firmicutes	c__Clostridia	o__Clostridiales	f__Lachnospiraceae	Others	Others	0	0	0	0	0	0	0	0	0	0	0	0	0	4	4	98	1	0	0	7	0	0	2	2	36	0	0	0	3	0	0	0	0	0	55	0	1	1	13	2
OTU_2208	k__Bacteria	p__Firmicutes	c__Erysipelotrichia	o__Erysipelotrichales	f__Erysipelotrichaceae	Others	Others	0	0	0	0	10	2	0	5	39	7	21	0	0	0	0	0	0	0	1	4	0	0	0	5	0	24	0	0	0	0	12	4	0	2	0	1	0	1	7	0
OTU_2209	k__Bacteria	p__Firmicutes	c__Clostridia	o__Clostridiales	f__Ruminococcaceae	Others	Others	2	3	0	0	0	0	3	2	0	0	46	7	0	0	0	2	0	5	0	0	0	0	2	0	0	0	0	4	0	0	0	0	0	0	0	0	0	0	0	0
OTU_2211	k__Bacteria	p__Bacteroidetes	c__Bacteroidia	o__Bacteroidales	f__Muribaculaceae	g__	s__	0	4	1	0	0	3	1	0	2	2	3	0	4	1	0	13	0	7	57	4	0	0	3	5	5	11	23	4	0	2	3	11	6	1	3	68	95	3	41	0
OTU_2213	k__Bacteria	p__Proteobacteria	c__Deltaproteobacteria	o__	f__	g__	s__	0	3	0	0	0	0	0	0	0	0	0	0	0	0	0	0	0	0	0	0	0	0	0	0	0	0	0	0	0	0	0	0	0	0	0	0	0	0	0	0
OTU_2214	k__Bacteria	p__Bacteroidetes	c__Bacteroidia	o__Bacteroidales	f__Muribaculaceae	g__	s__	0	0	0	0	0	0	0	0	0	0	0	0	0	0	0	0	5	0	0	0	0	0	0	0	0	0	0	0	0	0	0	0	0	0	0	0	0	0	0	0
OTU_2215	k__Bacteria	p__Firmicutes	c__Clostridia	o__Clostridiales	f__Lachnospiraceae	Others	Others	0	0	1	0	1	0	0	0	0	0	0	0	22	8	0	0	0	7	0	0	4	10	0	0	3	8	0	2	0	0	1	2	0	0	16	0	0	10	0	0
OTU_2217	k__Bacteria	p__Firmicutes	c__Clostridia	o__Clostridiales	f__Lachnospiraceae	g__Roseburia	Others	0	0	0	0	0	0	0	0	0	0	0	0	0	0	0	0	0	0	0	0	0	0	0	0	0	0	0	0	1	0	0	0	0	0	1	60	5	0	0	1
OTU_2219	k__Bacteria	p__Proteobacteria	c__Gammaproteobacteria	o__unidentified_Gammaproteobacteria	f__Nitrosomonadaceae	g__	s__	0	8	0	0	0	0	0	0	0	0	0	0	0	0	0	0	0	0	0	0	0	0	0	0	0	0	0	0	0	0	0	0	2	0	0	0	0	0	0	0
OTU_2220	k__Bacteria	p__Bacteroidetes	c__Bacteroidia	o__Bacteroidales	f__Muribaculaceae	g__	s__	0	0	0	0	0	0	0	0	0	0	0	0	0	0	0	0	2	0	0	0	0	0	0	0	0	0	0	0	0	0	0	0	0	0	0	0	0	0	0	0
OTU_2221	k__Bacteria	p__Bacteroidetes	c__Bacteroidia	o__Bacteroidales	f__Muribaculaceae	g__Muribaculum	Others	0	2	0	0	0	0	0	0	0	0	0	0	0	0	0	0	0	0	3	0	0	0	0	0	0	0	1	0	0	0	0	0	0	0	0	78	1	0	0	0
OTU_2222	k__Bacteria	p__Bacteroidetes	c__Bacteroidia	o__Bacteroidales	f__Muribaculaceae	Others	Others	0	0	0	0	0	0	0	0	2	0	0	0	0	0	0	0	0	5	0	4	0	0	0	0	0	0	0	0	0	0	0	0	0	2	0	0	0	0	6	0
OTU_2224	k__Bacteria	p__Firmicutes	c__Clostridia	o__Clostridiales	f__Lachnospiraceae	Others	Others	2	0	0	0	0	0	0	0	0	0	3	0	0	0	0	0	1	0	0	0	0	0	0	0	0	0	0	0	0	0	0	0	0	0	2	0	0	5	0	0
OTU_2225	k__Bacteria	p__Firmicutes	c__Clostridia	o__Clostridiales	f__unidentified_Clostridiales	g__unidentified_Clostridiales	Others	0	4	0	0	0	0	0	0	0	0	0	0	0	0	0	0	0	0	0	0	0	0	0	0	0	0	0	0	0	0	0	0	0	0	0	0	0	0	0	0
OTU_2226	k__Bacteria	p__Firmicutes	c__Clostridia	o__Clostridiales	f__Lachnospiraceae	Others	Others	0	0	3	0	13	11	0	4	7	0	0	0	0	0	10	20	1	16	3	0	0	2	0	0	0	1	0	13	5	1	0	17	0	0	0	16	0	0	0	0
OTU_2227	k__Bacteria	p__Firmicutes	c__Clostridia	o__Clostridiales	Others	Others	Others	0	0	0	0	0	0	0	0	0	0	0	0	0	0	0	0	0	0	0	0	0	0	0	0	0	0	0	0	9	0	0	0	0	0	0	0	0	0	0	0
OTU_2228	k__Bacteria	p__Proteobacteria	c__Deltaproteobacteria	o__Desulfovibrionales	f__Desulfovibrionaceae	g__Desulfovibrio	Others	0	0	2	0	6	3	2	0	3	2	0	0	5	0	4	1	4	0	1	1	11	5	1	0	0	0	2	5	4	3	4	2	0	6	2	0	0	4	1	3
OTU_2229	k__Bacteria	p__Firmicutes	c__Erysipelotrichia	o__Erysipelotrichales	f__Erysipelotrichaceae	g__Dubosiella	s__	0	0	0	0	0	0	0	0	2	0	0	0	0	0	0	0	0	0	0	0	0	0	0	0	0	0	39	0	0	1	0	0	0	0	0	176	8	0	0	0
OTU_2230	k__Bacteria	p__Gemmatimonadetes	c__unidentified_Gemmatimonadetes	o__Gemmatimonadales	f__Gemmatimonadaceae	Others	Others	0	0	0	0	0	0	0	0	0	0	0	0	0	0	0	0	0	0	0	0	0	0	0	3	0	0	0	0	0	0	0	0	0	0	0	0	0	0	0	0
OTU_2231	k__Bacteria	p__Bacteroidetes	c__Bacteroidia	o__Bacteroidales	f__Bacteroidaceae	g__Bacteroides	Others	0	0	0	1	0	0	0	0	0	0	0	0	0	0	0	0	1	0	0	2	0	0	0	0	2	0	0	0	0	0	0	0	0	0	0	0	0	0	0	0
OTU_2234	k__Bacteria	p__Firmicutes	c__Clostridia	o__Clostridiales	f__Lachnospiraceae	g__Lachnoclostridium	Others	4	40	5	13	8	4	0	14	3	17	49	17	47	36	2	28	15	1	9	2	5	5	10	5	13	7	0	18	0	0	10	57	4	11	3	0	0	14	6	0
OTU_2235	k__Bacteria	p__Bacteroidetes	c__Bacteroidia	o__Bacteroidales	f__Muribaculaceae	g__	s__	0	0	0	0	0	0	0	1	0	0	0	0	0	0	0	0	0	0	14	0	0	0	0	0	0	0	1	0	0	0	0	0	0	3	0	1	3	0	5	0
OTU_2237	k__Bacteria	p__Chloroflexi	Others	Others	Others	Others	Others	0	0	0	0	0	0	0	0	0	0	0	0	0	0	0	0	0	0	0	0	0	0	0	0	0	0	0	0	2	0	0	0	0	0	0	0	0	0	0	0
OTU_2238	k__Bacteria	p__Proteobacteria	Others	Others	Others	Others	Others	0	0	0	0	0	0	0	0	0	0	0	0	0	0	0	0	0	0	0	0	0	0	1	0	0	0	0	0	0	0	0	0	0	0	0	0	0	0	0	0
OTU_2240	k__Bacteria	p__unidentified_Bacteria	c__unidentified_Bacteria	o__unidentified_Bacteria	f__unidentified_Bacteria	g__Coprothermobacter	s__	0	0	0	0	0	0	0	0	0	0	0	0	0	0	0	0	0	0	0	0	0	0	0	0	0	0	0	0	0	0	0	0	0	0	0	0	0	0	0	0
OTU_2241	k__Bacteria	p__Firmicutes	c__Clostridia	o__Clostridiales	f__Ruminococcaceae	g__unidentified_Ruminococcaceae	s__Anaerostipes_hadrus	0	0	0	0	0	0	0	0	0	0	0	0	0	0	0	0	0	0	0	0	0	0	0	0	0	0	0	0	2	0	0	0	0	0	0	0	0	0	0	0
OTU_2242	k__Bacteria	p__Firmicutes	c__Clostridia	o__Clostridiales	f__Ruminococcaceae	Others	Others	7	0	54	2	19	25	10	16	21	11	225	62	395	80	25	28	8	9	129	14	25	34	24	104	31	44	0	193	14	71	4	47	42	14	15	0	0	24	49	27
OTU_2243	k__Bacteria	p__Bacteroidetes	c__Bacteroidia	o__Bacteroidales	f__Muribaculaceae	g__	s__	0	0	0	0	0	0	0	0	0	0	0	0	0	0	0	0	0	0	0	0	0	0	0	0	1	0	0	0	0	0	0	0	0	0	0	0	0	0	0	0
OTU_2245	k__Bacteria	p__Proteobacteria	c__Deltaproteobacteria	o__Desulfovibrionales	f__Desulfovibrionaceae	g__Desulfovibrio	Others	50	177	0	6	250	133	0	74	44	84	203	10	26	130	3	167	3	36	147	68	29	19	4	18	25	30	5	21	18	7	64	113	1	32	9	2	16	131	138	5
OTU_2247	k__Bacteria	p__Tenericutes	c__Mollicutes	o__	f__	g__	s__	0	0	7	2	0	0	0	0	0	0	1	0	0	0	0	6	7	0	0	0	0	0	0	0	714	0	0	0	73	0	0	0	0	0	0	5	0	0	0	0
OTU_2249	k__Bacteria	p__Bacteroidetes	c__Bacteroidia	o__Bacteroidales	f__Muribaculaceae	g__	s__	4	4	0	1	1	0	0	4	0	0	8	4	0	0	2	1	0	0	3	0	2	0	12	0	5	0	1	3	1	0	3	2	4	0	17	2	2	2	0	7
OTU_2250	k__Bacteria	p__Tenericutes	c__Mollicutes	o__	f__	g__	s__	0	0	0	0	0	0	0	0	0	0	0	0	0	0	0	0	0	0	0	0	0	0	3	0	0	0	0	0	2	0	0	0	0	0	0	0	0	0	0	0
OTU_2253	k__Bacteria	p__unidentified_Bacteria	c__unidentified_Bacteria	o__unidentified_Bacteria	f__unidentified_Bacteria	g__Candidatus_Saccharimonas	s__	0	0	0	0	3	0	0	0	0	0	0	1	8	11	4	4	0	0	7	0	0	8	0	6	12	12	14	14	457	1	6	1	0	0	3	0	14	28	0	18
OTU_2255	k__Bacteria	p__Firmicutes	c__Erysipelotrichia	o__Erysipelotrichales	f__Erysipelotrichaceae	g__Faecalibaculum	Others	0	0	0	0	0	0	0	0	0	6	0	0	0	0	0	0	0	0	3	5	0	0	0	0	0	0	0	0	0	41	0	0	0	0	0	0	20	0	0	0
OTU_2256	k__Bacteria	p__Proteobacteria	c__Deltaproteobacteria	o__Bdellovibrionales	f__Bacteriovoracaceae	g__	s__	0	3	0	0	0	0	0	0	0	0	0	0	0	0	0	0	0	0	0	0	0	0	0	0	0	0	0	0	0	0	0	0	0	0	0	0	0	0	0	0
OTU_2257	k__Bacteria	p__Firmicutes	c__Clostridia	o__Clostridiales	f__Ruminococcaceae	g__unidentified_Ruminococcaceae	Others	0	0	0	0	0	2	34	3	0	0	32	2	9	4	0	1	3	3	0	0	0	0	3	0	5	12	0	44	0	0	0	0	0	0	1	0	2	0	0	0
OTU_2258	k__Bacteria	p__Firmicutes	c__Clostridia	o__Clostridiales	f__Ruminococcaceae	Others	Others	0	2	0	0	0	0	0	0	0	0	0	0	2	0	0	0	0	0	2	0	0	0	0	0	0	0	4	0	0	1	0	0	0	0	0	36	0	0	1	0
OTU_2260	k__Bacteria	p__Proteobacteria	c__Alphaproteobacteria	o__Rhodobacterales	f__Rhodobacteraceae	Others	Others	0	1	0	0	0	0	0	0	0	0	0	0	0	0	0	0	0	0	0	0	0	0	0	0	0	0	0	0	0	0	0	0	0	0	0	0	0	0	1	0
OTU_2262	k__Bacteria	p__Firmicutes	c__Clostridia	o__Clostridiales	f__Lachnospiraceae	Others	Others	0	0	0	0	0	0	0	0	0	0	0	0	0	0	9	219	0	0	0	0	0	0	0	0	3	0	0	0	0	5	0	2	0	0	0	0	0	0	0	21
OTU_2263	k__Bacteria	p__Firmicutes	c__Clostridia	o__Clostridiales	f__Ruminococcaceae	g__unidentified_Ruminococcaceae	Others	4	0	1	0	2	0	0	0	1	0	5	1	4	5	2	3	0	3	5	0	0	0	0	0	8	6	0	0	6	2	2	8	3	0	1	2	4	0	0	2
OTU_2265	k__Bacteria	p__Firmicutes	c__Clostridia	o__Clostridiales	f__Lachnospiraceae	g__unidentified_Lachnospiraceae	s__Eubacterium_ventriosum	0	0	0	0	0	0	0	0	0	0	0	0	0	0	0	0	0	0	1	0	0	0	0	0	0	0	0	0	0	0	0	0	2	0	0	0	0	0	0	0
OTU_2266	k__Bacteria	p__Bacteroidetes	c__Bacteroidia	o__Bacteroidales	f__Muribaculaceae	g__	s__	5	4	0	0	0	1	2	5	1	0	1	3	1	0	17	23	1	6	45	16	11	1	3	2	28	9	6	1	9	0	0	5	27	13	13	38	26	3	86	4
OTU_2267	k__Bacteria	p__Bacteroidetes	c__Bacteroidia	o__Bacteroidales	f__Muribaculaceae	g__	s__	7	0	0	1	0	0	0	6	0	0	5	0	0	0	16	1	0	2	1	0	8	0	6	0	0	2	0	0	0	0	0	3	19	6	35	0	0	0	2	0
OTU_2268	k__Bacteria	p__Firmicutes	c__Clostridia	o__Clostridiales	f__Ruminococcaceae	Others	Others	69	23	28	15	68	6	79	47	3	27	72	31	86	20	157	105	14	15	257	32	0	3	16	26	57	32	15	26	116	14	18	79	120	217	160	20	114	85	63	21
OTU_2269	k__Bacteria	p__Bacteroidetes	c__Bacteroidia	o__Bacteroidales	f__Muribaculaceae	g__	s__	9	0	0	1	0	0	1	0	0	0	4	5	0	0	4	2	1	0	3	4	6	0	3	0	15	2	0	7	5	0	0	4	8	0	7	0	4	0	0	7
OTU_2271	k__Bacteria	p__Firmicutes	c__Clostridia	o__Clostridiales	f__Lachnospiraceae	Others	Others	0	1	0	0	0	0	0	0	0	0	0	0	0	0	0	7	0	0	0	0	0	0	0	0	1	0	0	0	0	0	0	0	0	0	0	0	0	0	0	1
OTU_2272	k__Bacteria	p__Firmicutes	c__Clostridia	o__Clostridiales	f__Ruminococcaceae	Others	Others	1	1	1	0	1	0	2	0	0	0	0	0	4	0	4	2	1	0	3	0	0	4	0	2	3	0	1	2	4	1	4	3	2	1	1	7	0	0	0	4
OTU_2274	k__Bacteria	p__Bacteroidetes	c__Bacteroidia	o__Bacteroidales	f__Prevotellaceae	g__	s__	0	0	0	0	0	0	0	0	0	0	0	0	0	0	0	0	1	0	0	0	0	0	0	0	0	0	0	0	0	0	0	0	0	0	0	0	0	0	0	0
OTU_2275	k__Bacteria	p__Actinobacteria	c__unidentified_Actinobacteria	o__Propionibacteriales	f__Nocardioidaceae	g__Nocardioides	s__Nocardioides_exalbidus	0	0	0	0	0	0	0	0	0	0	0	0	0	0	0	0	0	0	2	0	0	0	0	0	0	0	0	0	0	0	0	0	0	0	0	0	0	0	0	0
OTU_2276	k__Bacteria	p__Bacteroidetes	c__Bacteroidia	o__Bacteroidales	f__Muribaculaceae	g__	s__	0	0	0	0	0	0	5	2	1	0	1	0	2	0	1	1	0	3	4	0	3	0	4	0	0	0	0	0	1	0	0	0	0	0	2	5	0	0	0	0
OTU_2277	k__Bacteria	p__Chloroflexi	c__Chloroflexia	o__Chloroflexales	f__Roseiflexaceae	g__	s__	0	1	0	0	0	0	0	0	0	0	0	0	0	0	0	0	0	0	0	0	0	0	0	0	0	0	0	0	0	0	0	0	0	0	0	0	0	0	0	0
OTU_2278	k__Bacteria	p__Bacteroidetes	c__Bacteroidia	o__Bacteroidales	f__Bacteroidaceae	g__Bacteroides	Others	4	0	0	0	0	0	0	0	0	0	0	0	0	0	0	0	0	0	0	0	0	0	0	0	4	0	0	0	0	0	0	0	0	0	0	0	0	0	1	2
OTU_2280	k__Bacteria	p__Firmicutes	c__Clostridia	o__Clostridiales	f__Lachnospiraceae	Others	Others	0	0	1	2	1	0	0	3	0	4	12	3	24	0	34	0	0	2	0	14	2	0	0	1	0	23	4	26	16	0	0	43	0	0	0	0	0	26	79	0
OTU_2281	k__Bacteria	p__Verrucomicrobia	c__Verrucomicrobiae	o__Verrucomicrobiales	f__Akkermansiaceae	g__Akkermansia	Others	0	0	0	0	0	0	5	16	0	0	22	4	0	0	0	0	0	0	0	0	4	3	15	0	0	11	0	6	0	0	3	0	4	0	0	0	0	1	0	0
OTU_2282	k__Bacteria	p__Firmicutes	c__Clostridia	o__Clostridiales	Others	Others	Others	0	0	0	0	0	0	0	0	0	0	0	0	0	0	0	0	0	0	0	0	0	0	0	0	0	0	0	0	0	0	0	0	0	0	0	0	0	0	0	0
OTU_2283	k__Bacteria	p__Firmicutes	c__Bacilli	o__Bacillales	f__Thermoactinomycetaceae	g__Thermoactinomyces	Others	0	5	0	0	0	0	0	0	0	0	0	0	0	0	0	0	0	0	0	0	0	0	0	0	0	0	0	0	0	0	2	0	0	0	0	0	0	0	0	0
OTU_2287	k__Bacteria	p__Firmicutes	c__Erysipelotrichia	o__Erysipelotrichales	f__Erysipelotrichaceae	g__Dubosiella	s__	0	0	0	0	4	3	15	6	32	15	77	16	2	4	29	0	2	0	3	11	11	2	28	7	0	68	7	0	0	0	37	10	5	7	6	8	1	5	5	4
OTU_2289	k__Bacteria	p__Firmicutes	c__Clostridia	o__Thermoanaerobacterales	f__	g__	s__	0	0	0	0	0	1	0	0	0	0	0	0	0	0	0	0	0	0	0	0	0	0	0	0	0	0	0	0	0	0	0	0	0	0	0	0	0	0	0	0
OTU_2290	k__Bacteria	p__Firmicutes	c__Clostridia	o__Clostridiales	f__Ruminococcaceae	Others	Others	0	0	0	0	0	0	0	0	0	0	0	0	0	0	0	0	0	0	0	0	0	0	0	0	0	0	0	0	1	0	0	0	3	0	0	0	0	0	0	0
OTU_2291	k__Bacteria	p__Proteobacteria	c__Gammaproteobacteria	o__unidentified_Gammaproteobacteria	f__Burkholderiaceae	g__Candidatus_Tremblaya	s__Candidatus_Tremblaya_phenacola	0	0	0	0	0	0	0	0	0	0	0	0	0	0	0	0	0	0	0	0	0	0	0	0	0	0	0	0	0	0	0	0	0	0	0	0	0	0	0	0
OTU_2292	k__Bacteria	Others	Others	Others	Others	Others	Others	0	0	0	0	0	0	0	0	0	0	0	0	0	0	0	0	0	0	0	0	0	0	0	0	0	0	0	0	0	0	0	0	0	0	0	0	0	0	0	0
OTU_2294	k__Bacteria	p__Firmicutes	c__Clostridia	o__Clostridiales	f__Lachnospiraceae	Others	Others	0	2	0	0	0	0	1	0	0	0	0	0	0	0	0	0	0	0	0	0	0	0	0	0	0	0	0	0	20	0	0	0	2	0	0	4	0	0	0	0
OTU_2295	k__Bacteria	p__Proteobacteria	c__Gammaproteobacteria	o__Xanthomonadales	f__Xanthomonadaceae	Others	Others	0	0	0	0	0	0	0	0	0	0	0	0	0	0	0	0	0	0	0	0	0	0	0	0	0	0	0	0	0	0	0	0	1	0	0	0	0	0	0	0
OTU_2296	k__Bacteria	p__Firmicutes	c__Erysipelotrichia	o__Erysipelotrichales	f__Erysipelotrichaceae	g__Dubosiella	s__	0	0	0	2	3	3	3	3	13	10	11	8	2	2	8	0	1	5	4	4	3	1	6	6	0	25	81	0	0	10	17	1	1	4	4	418	21	0	1	3
OTU_2297	k__Bacteria	p__Bacteroidetes	c__Bacteroidia	o__Bacteroidales	f__Rikenellaceae	g__Alistipes	Others	4	0	0	0	0	0	3	0	0	0	0	0	1	0	0	0	0	0	4	0	0	2	0	0	3	1	0	0	1	0	0	0	7	0	6	3	0	2	0	0
OTU_2298	k__Bacteria	p__Firmicutes	c__Negativicutes	o__Selenomonadales	f__Veillonellaceae	g__Dialister	s__	0	0	1	0	0	0	0	0	0	0	0	0	0	0	0	0	0	0	1	0	0	0	0	0	0	2	0	2	0	0	0	0	2	0	0	0	0	0	3	0
OTU_2299	k__Bacteria	p__Firmicutes	c__Erysipelotrichia	o__Erysipelotrichales	f__Erysipelotrichaceae	g__Ileibacterium	s__Ileibacterium_valens	17	26	4	6	4	4	0	12	10	11	0	0	0	15	0	0	2	27	7	21	6	6	0	4	0	3	11	0	0	0	7	0	0	6	0	0	25	8	14	0
OTU_2300	k__Bacteria	p__Firmicutes	c__Clostridia	o__Clostridiales	f__Peptococcaceae	g__	s__	0	0	0	0	0	0	0	0	0	0	0	0	0	0	0	0	0	0	0	0	0	0	0	0	0	0	0	0	0	0	0	0	0	0	0	0	0	0	0	0
OTU_2301	k__Bacteria	p__Firmicutes	c__Erysipelotrichia	o__Erysipelotrichales	f__Erysipelotrichaceae	Others	Others	17	3	0	3	3	8	4	4	5	14	7	2	54	21	0	0	3	1	1	69	0	0	0	9	5	0	2	0	49	13	15	3	0	1	0	2	1	0	193	106
OTU_2302	k__Bacteria	p__Firmicutes	c__Clostridia	o__Clostridiales	f__Ruminococcaceae	Others	Others	0	0	0	0	0	2	0	0	0	0	0	0	0	0	0	0	1	0	0	0	0	0	0	0	0	0	0	0	0	0	0	0	0	0	0	0	0	0	0	0
OTU_2303	k__Bacteria	p__Firmicutes	c__Clostridia	o__Clostridiales	f__Lachnospiraceae	Others	Others	0	0	1	0	0	0	0	0	0	0	0	0	0	0	8	0	0	0	0	0	0	0	0	0	0	0	1	0	4	0	0	0	0	0	0	2	3	0	0	0
OTU_2304	k__Bacteria	p__Firmicutes	c__Clostridia	o__Clostridiales	f__Ruminococcaceae	g__unidentified_Ruminococcaceae	Others	0	0	1	0	0	3	2	0	0	0	4	1	0	0	0	1	0	0	2	0	2	0	1	0	1	0	0	1	1	0	0	0	3	0	0	0	0	0	0	0
OTU_2305	k__Bacteria	p__Firmicutes	c__Clostridia	o__Clostridiales	f__Ruminococcaceae	Others	Others	0	0	0	0	0	0	0	0	4	0	0	0	0	0	0	0	0	0	0	0	0	0	0	0	0	7	0	0	0	0	3	0	0	0	0	0	0	0	0	0
OTU_2306	k__Bacteria	p__Firmicutes	c__Erysipelotrichia	o__Erysipelotrichales	f__Erysipelotrichaceae	g__Ileibacterium	s__Ileibacterium_valens	284	7461	287	221	33	627	0	39	1111	638	26	1	13	129	13	1	76	3345	487	1596	294	134	0	812	0	32	1222	0	2	19	424	2	0	322	0	0	2883	154	1813	0
OTU_2307	k__Bacteria	p__Firmicutes	c__Clostridia	o__Clostridiales	Others	Others	Others	0	0	0	0	0	0	0	0	0	0	0	0	0	0	0	0	0	0	0	0	0	0	0	0	0	0	0	0	4	0	0	0	0	0	0	19	0	0	0	0
OTU_2309	k__Bacteria	p__Firmicutes	c__Clostridia	o__Clostridiales	f__Lachnospiraceae	g__Blautia	s__Ruminococcus_sp_Marseille-P328	0	0	0	0	0	3	0	4	0	0	0	0	0	0	0	0	0	0	0	0	0	0	6	0	0	0	0	0	0	0	0	0	4	0	0	0	0	0	0	0
OTU_2311	k__Bacteria	p__Proteobacteria	c__Alphaproteobacteria	o__Rhizobiales	f__Beijerinckiaceae	g__Microvirga	Others	0	0	0	0	0	0	0	0	0	0	0	0	0	0	0	0	0	0	0	0	0	0	0	0	0	0	0	0	0	0	0	0	0	0	0	0	0	0	0	0
OTU_2314	k__Bacteria	p__Firmicutes	c__Bacilli	o__Lactobacillales	f__Lactobacillaceae	g__Lactobacillus	s__Lactobacillus_delbrueckii	0	0	0	0	0	1	0	0	0	0	0	0	0	0	0	0	0	0	0	0	0	0	3	13	0	8	0	0	1	0	0	0	0	0	0	0	0	0	0	0
OTU_2316	k__Bacteria	p__Bacteroidetes	c__Bacteroidia	o__Bacteroidales	f__Muribaculaceae	Others	Others	0	0	0	0	0	0	0	0	0	0	0	0	0	0	0	2	0	0	0	0	0	0	0	0	0	0	0	0	0	0	0	0	0	0	0	139	0	0	0	0
OTU_2317	k__Archaea	p__unidentified_Archaea	c__unidentified_Archaea	o__unidentified_Archaea	f__unidentified_Archaea	g__unidentified_Archaea	Others	0	4	0	0	0	0	0	0	0	0	0	0	0	0	0	0	0	0	0	0	0	0	0	0	0	0	0	0	0	0	0	0	0	0	0	0	0	0	0	0
OTU_2319	k__Bacteria	p__Bacteroidetes	c__Bacteroidia	o__Bacteroidales	f__Muribaculaceae	g__	s__	0	0	0	0	0	0	2	2	0	0	2	0	0	0	5	0	0	1	0	0	1	0	0	0	0	0	0	0	0	0	0	2	16	0	8	2	0	0	0	0
OTU_2321	k__Bacteria	p__Firmicutes	c__Erysipelotrichia	o__Erysipelotrichales	f__Erysipelotrichaceae	g__Dubosiella	s__	0	0	0	0	1	0	0	2	19	8	4	0	0	2	0	0	0	0	1	1	0	0	0	0	0	11	0	0	0	0	11	0	0	0	0	0	0	0	0	0
OTU_2322	k__Bacteria	p__Chloroflexi	c__unidentified_Chloroflexi	o__unidentified_Chloroflexi	f__unidentified_Chloroflexi	g__unidentified_Chloroflexi	Others	0	0	0	0	0	0	0	0	0	0	0	0	0	0	0	0	0	0	0	0	0	0	0	0	0	0	0	0	0	0	0	0	0	0	0	0	0	0	0	0
OTU_2323	k__Bacteria	p__Firmicutes	c__Bacilli	o__Lactobacillales	f__Lactobacillaceae	g__Lactobacillus	Others	0	0	0	0	0	0	0	0	0	0	0	0	1	0	0	0	0	0	3	0	0	0	0	0	0	0	0	0	0	0	0	0	0	0	0	0	0	0	0	1
OTU_2324	k__Bacteria	p__Bacteroidetes	c__Bacteroidia	o__Bacteroidales	f__Muribaculaceae	g__	s__	3	0	0	0	0	0	0	0	0	0	1	0	1	0	5	0	0	0	0	0	4	0	0	0	1	0	4	0	0	0	0	0	2	0	1	0	0	0	0	3
OTU_2325	k__Bacteria	p__Bacteroidetes	c__Bacteroidia	o__Bacteroidales	f__Muribaculaceae	g__	s__	0	11	0	0	0	0	0	0	0	0	0	0	0	0	0	0	0	0	3	0	0	0	0	0	0	0	0	0	0	0	0	0	0	0	1	71	0	0	0	0
OTU_2326	k__Bacteria	p__Firmicutes	c__Clostridia	o__Clostridiales	f__Ruminococcaceae	Others	Others	0	0	0	0	3	0	0	0	0	0	0	0	0	0	0	0	0	0	0	0	0	0	0	0	0	0	0	11	0	0	0	0	0	0	0	0	0	0	0	0
OTU_2327	k__Bacteria	p__Proteobacteria	c__Deltaproteobacteria	o__Oligoflexales	f__	g__	s__	0	0	0	0	0	0	0	0	0	0	0	1	0	0	0	0	0	0	0	0	0	0	0	0	0	0	0	0	0	0	0	0	0	0	0	0	0	0	0	0
OTU_2328	k__Bacteria	p__Firmicutes	c__Clostridia	o__Clostridiales	f__Ruminococcaceae	Others	Others	0	0	0	0	1	0	0	0	0	0	0	0	0	0	0	0	0	0	0	0	0	0	0	0	0	0	0	0	0	0	0	0	0	0	0	0	0	0	0	0
OTU_2329	k__Bacteria	p__Firmicutes	c__Clostridia	o__Clostridiales	f__Ruminococcaceae	g__unidentified_Ruminococcaceae	Others	0	0	0	0	0	0	0	0	0	0	0	0	0	0	0	0	0	0	0	0	0	0	0	0	0	0	0	0	0	0	0	0	0	0	0	0	0	0	0	0
OTU_2330	k__Bacteria	p__Firmicutes	c__Clostridia	o__Clostridiales	f__Lachnospiraceae	Others	Others	0	0	0	0	0	0	0	0	0	0	0	0	0	0	0	27	0	0	0	0	0	0	0	0	0	0	0	0	0	0	0	0	0	0	0	0	0	0	0	0
OTU_2333	k__Bacteria	p__Firmicutes	c__Clostridia	o__Clostridiales	f__Ruminococcaceae	Others	Others	0	0	25	0	7	3	5	9	0	3	0	11	1	2	7	0	7	2	7	2	3	4	0	1	6	1	6	2	79	6	0	10	37	2	32	39	28	0	0	14
OTU_2334	k__Bacteria	p__Firmicutes	c__Bacilli	o__Lactobacillales	f__Lactobacillaceae	g__Lactobacillus	Others	1	3	6	8	4	1	0	2	0	5	2	4	1	1	2	3	0	3	6	7	0	4	0	0	7	7	2	0	6	21	0	0	0	7	0	0	11	0	0	0
OTU_2336	k__Bacteria	p__Proteobacteria	c__Gammaproteobacteria	o__unidentified_Gammaproteobacteria	f__Neisseriaceae	g__	s__	0	0	2	0	0	0	0	0	0	0	0	0	0	0	0	0	0	0	0	0	0	0	0	0	0	0	0	0	0	0	0	0	0	0	0	0	0	0	0	0
OTU_2337	k__Bacteria	p__Firmicutes	c__Clostridia	o__Clostridiales	f__Lachnospiraceae	Others	Others	0	0	0	0	0	0	0	0	0	0	0	0	0	0	0	0	2	0	0	0	0	0	0	0	0	0	0	0	0	0	0	0	0	0	0	0	0	0	0	0
OTU_2338	k__Bacteria	p__unidentified_Bacteria	c__unidentified_Bacteria	o__unidentified_Bacteria	f__unidentified_Bacteria	g__unidentified_Bacteria	s__Candidatus_Saccharibacteria_bacterium_GW2011_GWC2_44_17	0	0	0	0	0	0	0	2	0	0	0	0	0	0	0	0	0	0	0	0	0	0	0	0	0	0	0	0	0	0	0	0	0	0	0	0	0	0	0	0
OTU_2339	k__Bacteria	p__Proteobacteria	c__Deltaproteobacteria	o__Desulfuromonadales	f__Desulfuromonadaceae	g__Desulfuromonas	s__Desulfuromonas_thiophila	0	0	0	0	0	2	0	0	0	0	0	0	0	0	0	0	0	0	0	0	0	0	0	0	0	0	0	0	0	0	0	0	0	0	0	0	0	0	0	0
OTU_2340	k__Bacteria	p__Proteobacteria	c__Alphaproteobacteria	o__unidentified_Alphaproteobacteria	f__unidentified_Alphaproteobacteria	g__Reyranella	s__	0	3	0	0	0	0	0	0	0	0	0	1	0	0	0	0	0	0	0	0	0	0	0	0	0	0	0	0	0	0	0	0	0	0	0	0	0	0	0	0
OTU_2341	k__Bacteria	p__Firmicutes	c__Erysipelotrichia	o__Erysipelotrichales	f__Erysipelotrichaceae	g__Dubosiella	s__	0	0	0	0	3	3	0	1	34	5	21	6	0	2	0	0	2	0	5	11	2	1	1	0	0	13	0	0	0	0	21	1	3	7	2	0	0	0	10	0
OTU_2342	k__Bacteria	p__Firmicutes	c__Clostridia	o__Clostridiales	f__Lachnospiraceae	Others	Others	0	0	0	0	0	0	0	0	0	0	3	0	0	0	0	0	0	0	0	0	0	0	0	0	0	0	0	0	0	0	0	0	0	0	0	0	0	0	0	0
OTU_2343	k__Bacteria	p__Firmicutes	c__Clostridia	o__Clostridiales	f__Lachnospiraceae	g__unidentified_Lachnospiraceae	Others	0	0	0	0	0	0	0	0	0	0	0	0	0	0	0	0	0	0	0	0	0	0	0	0	0	0	0	0	0	4	0	0	0	0	0	31	0	0	0	0
OTU_2344	k__Bacteria	p__Bacteroidetes	c__Bacteroidia	o__Bacteroidales	f__Muribaculaceae	g__	s__	0	0	0	0	0	0	0	0	0	0	0	0	0	0	0	0	0	0	0	0	2	0	0	0	0	0	0	0	0	0	0	0	0	0	0	0	0	0	0	0
OTU_2345	k__Bacteria	p__Proteobacteria	c__Alphaproteobacteria	o__unidentified_Alphaproteobacteria	f__Geminicoccaceae	g__Candidatus_Alysiosphaera	s__	0	0	0	0	0	0	0	0	0	0	0	0	0	0	0	0	0	0	0	0	0	0	0	0	0	0	0	1	0	0	0	0	0	0	0	0	0	0	0	0
OTU_2346	k__Bacteria	p__Firmicutes	c__Clostridia	o__Clostridiales	f__Lachnospiraceae	g__unidentified_Lachnospiraceae	s__Lachnospiraceae_bacterium_A4	0	0	0	0	0	0	0	0	0	0	0	0	0	0	0	3	0	0	0	0	0	0	0	0	1	0	1	0	3	0	0	4	0	0	0	114	0	0	0	0
OTU_2347	k__Bacteria	p__Firmicutes	c__Clostridia	o__Clostridiales	f__Ruminococcaceae	Others	Others	3	13	5	0	4	0	1	1	0	2	8	1	10	0	4	8	0	0	69	9	0	0	0	3	2	2	4	0	15	6	3	3	2	8	7	24	15	4	8	0
OTU_2348	k__Bacteria	p__Firmicutes	c__Clostridia	o__Clostridiales	f__Lachnospiraceae	Others	Others	0	2	0	0	1	0	0	5	0	1	6	0	8	0	0	48	3	0	0	0	0	0	0	3	6	0	0	10	0	0	0	4	0	2	0	0	0	0	0	0
OTU_2349	k__Bacteria	p__Bacteroidetes	c__Ignavibacteria	o__Ignavibacteriales	f__Ignavibacteriaceae	g__Ignavibacterium	s__	0	0	0	0	0	0	0	0	0	1	0	0	0	0	0	0	0	0	0	0	0	0	0	0	0	0	0	2	0	0	0	0	0	0	0	0	0	0	0	0
OTU_2351	k__Bacteria	p__Proteobacteria	c__Alphaproteobacteria	o__Rhizobiales	f__unidentified_Rhizobiales	g__Alsobacter	s__	0	0	0	0	0	0	0	0	0	0	0	0	0	0	0	0	0	0	1	0	0	0	0	0	0	0	0	0	0	0	0	0	0	0	0	0	0	0	0	0
OTU_2352	k__Bacteria	p__Firmicutes	c__Clostridia	o__Clostridiales	f__Lachnospiraceae	Others	Others	0	0	0	0	0	0	0	0	0	2	0	0	0	7	0	0	0	0	0	1	1	0	0	9	0	0	0	2	0	0	0	0	1	1	0	0	0	6	0	0
OTU_2354	k__Bacteria	p__unidentified_Bacteria	c__unidentified_Bacteria	o__Campylobacterales	f__Helicobacteraceae	g__Helicobacter	Others	0	0	0	0	0	0	0	5	0	0	0	0	0	0	0	0	0	0	0	0	0	0	0	0	0	0	0	0	0	0	0	0	0	0	0	0	0	0	0	0
OTU_2355	k__Bacteria	p__Firmicutes	c__Clostridia	o__Clostridiales	f__Lachnospiraceae	g__unidentified_Lachnospiraceae	s__Lachnospiraceae_bacterium_DW67	1	5	0	0	0	0	0	0	0	0	1	0	12	1	0	1	0	0	4	2	0	0	0	3	1	0	0	1	1	0	0	0	0	2	2	0	0	0	0	0
OTU_2357	k__Bacteria	p__Bacteroidetes	c__Bacteroidia	o__Bacteroidales	f__	g__	s__	0	0	0	0	0	206	0	2	0	0	0	0	0	0	0	0	0	0	0	0	0	0	0	0	0	0	0	0	0	0	0	0	0	0	0	0	0	0	0	0
OTU_2361	k__Bacteria	p__Firmicutes	c__Clostridia	o__Clostridiales	f__Lachnospiraceae	g__unidentified_Lachnospiraceae	Others	0	0	0	0	0	0	3	0	0	0	0	0	0	0	0	0	0	0	0	0	0	0	0	0	0	0	0	0	0	0	0	0	0	0	0	0	0	0	0	0
OTU_2364	k__Bacteria	p__Bacteroidetes	c__Bacteroidia	o__Flavobacteriales	f__Flavobacteriaceae	g__Capnocytophaga	s__Capnocytophaga_gingivalis	0	0	0	0	0	0	0	0	0	0	0	0	0	0	0	0	0	0	0	0	0	0	0	0	0	0	0	0	0	0	4	0	0	0	0	0	0	0	0	0
OTU_2366	k__Bacteria	Others	Others	Others	Others	Others	Others	0	0	0	0	0	0	0	3	0	0	0	0	0	0	0	0	0	0	0	0	0	0	0	0	0	0	0	0	0	0	0	0	0	0	0	0	0	0	0	0
OTU_2367	k__Bacteria	p__Bacteroidetes	c__Bacteroidia	o__Bacteroidales	f__Bacteroidaceae	g__Bacteroides	Others	207	14	14	3	0	1	53	16	0	2	24	5	31	5	6	32	22	20	49	35	22	3	7	3	294	14	0	7	16	0	1	3	26	11	71	4	25	22	106	24
OTU_2368	k__Bacteria	p__Firmicutes	c__Clostridia	o__Clostridiales	f__Lachnospiraceae	Others	Others	0	0	0	0	1	1	3	0	2	0	3	0	3	11	0	0	0	0	0	1	1	0	0	0	0	0	0	0	0	0	0	0	0	1	5	1	0	0	0	0
OTU_2369	k__Bacteria	p__Firmicutes	c__Erysipelotrichia	o__Erysipelotrichales	f__Erysipelotrichaceae	g__Dubosiella	s__	5	7	5	14	130	169	194	81	598	382	439	354	11	63	134	2	96	3	128	153	112	79	159	103	4	413	83	7	0	6	464	59	84	260	84	164	37	28	70	31
OTU_2371	k__Bacteria	p__Firmicutes	c__Clostridia	o__Clostridiales	f__Lachnospiraceae	Others	Others	0	0	0	0	0	0	0	0	0	0	0	0	0	0	0	0	0	0	0	0	0	0	0	0	0	0	0	0	2	0	0	0	0	0	3	2	0	0	0	0
OTU_2373	k__Bacteria	p__Bacteroidetes	c__Bacteroidia	o__Bacteroidales	f__Muribaculaceae	g__	s__	6	2	5	2	0	0	0	1	0	0	0	0	0	0	0	0	0	0	3	0	2	0	0	0	0	0	0	0	0	0	0	0	0	1	1	0	0	0	0	0
OTU_2374	k__Bacteria	p__Proteobacteria	c__Gammaproteobacteria	Others	Others	Others	Others	0	4	0	0	0	0	0	0	0	0	0	0	0	0	0	0	0	0	0	0	0	0	0	0	0	0	0	0	0	0	0	0	0	0	0	0	0	0	0	0
OTU_2375	k__Bacteria	p__Actinobacteria	c__Thermoleophilia	o__Solirubrobacterales	f__	g__	s__	0	0	0	0	0	0	0	0	0	0	0	0	0	0	0	0	0	0	0	0	0	0	0	0	0	0	0	1	0	0	0	0	0	0	0	0	0	0	0	0
OTU_2376	k__Bacteria	p__Firmicutes	c__Clostridia	o__Clostridiales	f__Lachnospiraceae	g__Acetatifactor	Others	0	0	0	2	0	0	0	0	0	0	0	0	0	0	0	0	0	0	0	0	0	0	0	0	0	0	0	1	0	0	0	0	0	0	0	0	0	0	0	0
OTU_2377	k__Bacteria	p__Firmicutes	c__Erysipelotrichia	o__Erysipelotrichales	f__Erysipelotrichaceae	g__Erysipelatoclostridium	Others	21	12	9	15	0	0	58	0	2	0	154	6	62	1	0	12	2	0	0	0	2	7	45	8	0	0	4	99	0	0	0	0	32	30	5	1	0	0	4	20
OTU_2378	k__Bacteria	p__Firmicutes	c__Clostridia	o__Clostridiales	f__Lachnospiraceae	Others	Others	0	0	0	0	0	0	0	0	0	0	0	0	0	2	1	0	0	0	0	0	1	0	0	0	0	0	0	0	3	0	0	0	0	0	0	0	0	0	0	0
OTU_2380	k__Bacteria	p__Firmicutes	c__Erysipelotrichia	o__Erysipelotrichales	f__Erysipelotrichaceae	g__Ileibacterium	s__Ileibacterium_valens	0	8	0	1	2	0	0	0	0	1	0	0	0	0	0	0	0	2	0	3	1	0	0	4	0	0	0	0	0	0	0	0	0	0	0	0	5	1	0	0
OTU_2381	k__Bacteria	p__Bacteroidetes	c__Bacteroidia	o__Bacteroidales	f__Bacteroidaceae	g__Bacteroides	Others	2	0	0	0	0	0	3	0	0	0	0	0	0	0	0	0	2	2	0	0	0	0	0	0	2	0	0	0	0	0	0	0	0	0	1	0	0	0	2	0
OTU_2382	k__Bacteria	p__Bacteroidetes	c__Bacteroidia	o__Bacteroidales	f__Prolixibacteraceae	g__Mariniphaga	s__	0	0	0	0	0	2	0	0	0	0	0	0	0	0	0	0	0	0	0	0	0	0	0	0	0	0	0	0	0	0	0	0	0	0	0	0	0	0	0	0
OTU_2383	k__Bacteria	p__Verrucomicrobia	c__Verrucomicrobiae	o__Verrucomicrobiales	f__Rubritaleaceae	g__Luteolibacter	s__	0	0	0	0	0	0	0	0	0	0	0	0	0	0	0	0	0	0	0	0	0	0	0	0	0	0	0	0	0	0	0	0	0	0	0	0	0	0	0	0
OTU_2384	k__Bacteria	p__Firmicutes	c__Erysipelotrichia	o__Erysipelotrichales	f__Erysipelotrichaceae	g__Dubosiella	s__	0	0	0	0	0	1	0	0	5	5	1	4	1	0	0	0	1	0	3	0	0	1	0	0	0	12	0	0	0	0	10	1	0	5	0	9	0	0	1	0
OTU_2385	k__Bacteria	p__Firmicutes	c__Clostridia	o__Clostridiales	f__Christensenellaceae	Others	Others	0	0	0	0	0	0	0	0	0	0	0	0	0	0	0	0	0	0	0	0	0	0	0	0	0	0	0	0	0	0	0	0	0	0	0	0	0	0	0	0
OTU_2386	k__Bacteria	p__Firmicutes	c__Clostridia	o__Clostridiales	f__Lachnospiraceae	Others	Others	0	0	0	0	0	0	0	0	0	0	0	0	0	0	0	0	0	0	0	0	0	0	0	0	0	0	0	0	0	0	0	0	0	0	0	0	0	0	0	0
OTU_2390	k__Bacteria	p__Firmicutes	c__Clostridia	o__Clostridiales	f__Lachnospiraceae	g__unidentified_Lachnospiraceae	s__Clostridium_sp_Culture-54	3	9	1	8	13	4	9	10	3	2	5	0	6	13	5	8	0	2	0	1	0	2	2	3	0	16	0	16	33	0	0	50	2	33	19	0	4	10	0	22
OTU_2391	k__Bacteria	p__unidentified_Bacteria	c__unidentified_Bacteria	o__Campylobacterales	f__Helicobacteraceae	g__Helicobacter	s__Helicobacter_typhlonius	0	0	0	0	0	0	0	2	0	0	0	0	0	0	0	0	0	0	0	0	0	0	0	0	2	0	0	0	0	0	0	0	0	0	0	0	0	0	0	0
OTU_2392	k__Bacteria	p__Firmicutes	c__Clostridia	o__Clostridiales	f__Lachnospiraceae	g__Blautia	s__Lachnospiraceae_bacterium_609	0	0	0	0	0	0	1	0	0	0	0	0	4	0	13	1	1	0	0	0	0	0	0	0	1	0	0	0	0	0	2	0	1	1	0	0	5	0	0	0
OTU_2397	k__Bacteria	p__Bacteroidetes	c__Bacteroidia	o__Chitinophagales	f__Chitinophagaceae	g__Asinibacterium	s__	0	0	0	0	0	0	0	0	0	0	0	0	0	0	0	0	0	0	0	0	0	0	0	0	0	0	2	0	0	0	0	0	0	0	0	0	0	0	0	0
OTU_2399	k__Bacteria	p__Proteobacteria	c__Deltaproteobacteria	o__Myxococcales	f__Haliangiaceae	g__Haliangium	s__	0	10	0	0	0	0	0	0	0	0	0	0	0	0	0	0	0	0	0	0	0	0	0	0	0	0	0	0	0	0	0	0	0	0	0	0	0	0	0	0
OTU_2401	k__Bacteria	p__Firmicutes	c__Clostridia	o__Clostridiales	f__Lachnospiraceae	Others	Others	0	0	0	0	0	4	0	0	2	0	0	0	4	1	2	0	2	14	0	2	4	0	0	0	0	0	0	7	0	0	0	0	0	0	0	0	0	0	1	0
OTU_2403	k__Bacteria	p__Firmicutes	c__Clostridia	o__Clostridiales	f__Lachnospiraceae	Others	Others	0	0	0	0	0	0	0	0	0	0	0	0	0	0	0	0	0	0	0	0	0	0	0	0	0	0	5	0	0	19	0	0	0	0	0	7	0	0	0	0
OTU_2404	k__Bacteria	p__Bacteroidetes	c__Bacteroidia	o__Bacteroidales	f__Muribaculaceae	g__Muribaculum	Others	2	0	3	0	0	0	0	0	0	0	0	0	0	0	0	2	0	0	1	0	0	0	0	0	2	0	2	0	0	0	0	0	0	0	0	6	0	0	0	0
OTU_2405	k__Bacteria	p__Bacteroidetes	c__Bacteroidia	o__Bacteroidales	f__Bacteroidaceae	g__Bacteroides	s__Bacteroides_ovatus	5	2	0	0	0	0	3	3	0	1	0	0	0	0	0	0	0	0	0	1	0	0	2	0	1	0	0	0	19	0	0	0	4	0	1	0	0	1	3	0
[truncated: 402 more rows]
